# Supplementary material
Source: ML conference proceedings conference paper supplement (https://aclanthology.org/2024.findings-eacl.26)
Supplement: note [file dev.xlsx]

## Sheet: Sheet1
main_cord_uid	cord_uid	abstract	title	annotator_investigating_R0	text_response	json_response	publish_time	action	cluster_id
ves3pzl4	ves3pzl4	Background: Prime Minister of Japan Abe declared an emergency to control the COVIDÃ¢Ë†â€™19 outbreak on April 7, 2020. He asked almost half of the population of Japan to reduce their personal contacts by 70Ã¢Ë†â€™80%. Object: This study estimates the effectiveness of that emergency declaration. Method: We applied a simple susceptibleÃ¢Ë†â€™infectedÃ¢Ë†â€™recovery model to data of patients with sy…	Effect of emergency declaration for the COVID Ã¢Ë†â€™19 outbreak in Tokyo, Japan in the first two weeks	1	disease name: COVID-19 location: Tokyo, Japan date: February 27 to March 19 R0 value: 1.267 %CI values: [1.214, 1.341] method: simple susceptible-nfected-recovery model	[{"contribution":{"disease name": "COVID-19", "location": "Tokyo, Japan", "date": "February 27 to March 19", "R0 value": "1.267", "%CI values": "[1.214, 1.341]", "method": "simple susceptible-nfected-recovery model"}}]	2020-04-21 10:00:00
91si97iw	91si97iw	The coronavirus disease (COVID-19) which emerged in Wuhan, China, in December 2019, is widely controlled now in China. However, the global epidemic is still severe. To study and comment on Hubei's approaches for responding to the disease, the paper considered some factors such as suspected cases (part of them are influenza patients or common pneumonia patients, etc.), quarantine, patient classifi…	The Impact of Lockdown, Patient Classification, and the Large-Scale Case Screening on the Spread of the Coronavirus Disease 2019 (COVID-19) in Hubei	1	disease name: COVID-19 location: Hubei, China date: 10 to 22 January R0 value: 3.1571 %CI values: - method: SELIHR model based on the surveillance data of Hubei ,fminsearch optimization method | disease name: COVID-19 location: Hubei, China date: from 23 to 27 January R0 value: 2.0471 %CI values: - method: SELIHR model based on the surveillance data of Hubei ,fminsearch optimization method | dise…	[{"contribution":{"disease name": "COVID-19", "location": "Hubei, China", "date": "10 to 22 January", "R0 value": "3.1571", "%CI values": "-", "method": "SELIHR model based on the surveillance data of Hubei ,fminsearch optimization method"}},{"contribution":{"disease name": "COVID-19", "location": "Hubei, China", "date": "from 23 to 27 January", "R0 value": "2.0471", "%CI values": "-", "method": …	2022-05-06 10:00:00		661
ffp539qx	ffp539qx	This paper investigates a new model on coronavirus-19 disease (COVID-19), that is complex fractional SIR epidemic model with a nonstandard nonlinear incidence rate and a recovery, where derivative operator with Mittag-Leffler kernel in the Caputo sense (ABC). The model has two equilibrium points when the basic reproduction number [Formula: see text] ; a disease-free equilibrium [Formula: see text…	Complex mathematical SIR model for spreading of COVID-19 virus with Mittag-Leffler kernel	-1	unanswerable	unanswerable	2021-07-03 10:00:00
a72ok3yv	a72ok3yv	There remains a great challenge to minimize the spread of epidemics. This may be particularly true on densely populated, residential college campuses. To construct class and residential networks I used data from a four-year, residential liberal arts college with 5539 students. Equal-sized random networks also were created for each day. Different levels of compliance with mask use (none to 100%), …	Network assessment and modeling the management of an epidemic on a college campus with testing, contact tracing, and masking	-1	unanswerable	unanswerable	2021-04-09 10:00:00
tbbucb47	tbbucb47	We consider the $SEIRS$ epidemiology model with such features of the COVID-19 outbreak as: abundance of unidentified infected individuals, limited time of immunity and a possibility of vaccination. Within a compartmental realization of this model, we found the disease-free and the endemic stationary states. They exist in their respective restricted regions of the le via linear stability analysis.…	Compartmental and cellular automaton $SEIRS$ epidemiology models for the COVID-19 pandemic with the effects of temporal immunity and vaccination (preprint)/ en	-1	unanswerable	unanswerable	-
s1rixj81	s1rixj81	The novel coronavirus, which was called 2019-nCoV at the beginning of the outbreak, was named SARS-CoV-2 later. The clinical disease caused by the virus was also called Coronavirus disease 2019 (COVID-19). World Health Organization declared COVID-19 a global pandemic on 11.03.2020. As of 26.03.2020, there have been 462.684 confirmed cases and 20.834 deaths globally, and these numbers are expected…	2019 Coronavirus pandemic in Turkey and across the world/ DÃƒÂ¼nyada ve TÃƒÂ¼rkiye'de 2019 KoronavirÃƒÂ¼s Pandemisi	-1	unanswerable	unanswerable	2020
es7n6g3o	es7n6g3o	Time dependent reproduction number (TD - R0) is a measure of secondary infections or transmissibility of a disease useful in monitoring changes in the rate of infection and assessing policies put in place to control the spread of a.2, disease. In this study we used daily infections situation report of COVID - 19 published by the Nigeria Centre for Disease Control (NCDC) to estimate Nigeria's TD -…	Analysing secondary infections of coronavirus disease 2019 across the geopolitical zones of Nigeria using estimated time dependent reproduction number	-1	unanswerable	unanswerable	2020
9j1gf8n3	9j1gf8n3	BACKGROUND: On 20 February 2020, a locally acquired coronavirus disease (COVID-19) case was detected in Lombardy, Italy. This was the first signal of ongoing transmission of severe acute respiratory syndrome coronavirus 2 (SARS-CoV-2) in the country. The number of cases in Italy increased rapidly and the country became the first in Europe to experience a SARS-CoV-2 outbreak. AIM: Our aim was to d…	Epidemiological characteristics of COVID-19 cases and estimates of the reproductive numbers 1 month into the epidemic, Italy, 28 January to 31 March 2020	1	disease name: COVID-19 location: Tuscany,Italy date: 28 January to 31 March 2020 R0 value: 2.50 %CI values: 95% confidence interval (CI): 2.18-2.83 method: - | disease name: COVID-19 location: Lazio, Italy date: 28 January to 31 March 2020 R0 value: 3.00 %CI values: 95% CI: 2.68-3.33 method: - | disease name: COVID-19 location: Lombardy, Italy date: 28 January to 31 March 2020 R0 value: 2.96 %CI …	[{"contribution":{"disease name": "COVID-19", "location": "Tuscany,Italy", "date": "28 January to 31 March 2020", "R0 value": "2.50", "%CI values": "95% confidence interval (CI): 2.18-2.83", "method": "-"}},{"contribution":{"disease name": "COVID-19", "location": "Lazio, Italy", "date": "28 January to 31 March 2020", "R0 value": "3.00", "%CI values": "95% CI: 2.68-3.33", "method": "-"}},{"contrib…	2020-12-10 05:00:00		95
eey3j1uk	eey3j1uk	In December 2020, the United Kingdom (UK) reported a SARS-CoV-2 Variant of Concern (VoC) which is now coined B.1.1.7. Based on the UK data and later additional data from other countries, a transmission advantage of around 40-80% was estimated for this variant. In Switzerland, since spring 2020, we perform whole genome sequencing of SARS-CoV-2 samples obtained from a large diagnostic lab (Viollier…	Quantification of the spread of SARS-CoV-2 variant B.1.1.7 in Switzerland	1	disease name: SARS-CoV-2 variant B.1.1.7 location: Switzerland date: 01.01.2021-17.01.2021 R0 value: 1.28 %CI values: 1.07-1.49 method: Estimate based on total number of confirmed cases and Viollier sequencing data.	[{"contribution":{"disease name": "SARS-CoV-2 variant B.1.1.7", "location": "Switzerland", "date": "01.01.2021-17.01.2021", "R0 value": "1.28", "%CI values": "1.07-1.49", "method": "Estimate based on total number of confirmed cases and Viollier sequencing data."}}]	2021-03-09
8n85abve	8n85abve	A deterministic model is designed and used to analyze the transmission dynamics and the impact of antiviral drugs in controlling the spread of the 2009 swine influenza pandemic. In particular, the model considers the administration of the antiviral both as a preventive as well as a therapeutic agent. Rigorous analysis of the model reveals that its disease-free equilibrium is globally asymptotical…	Mathematical analysis of swine influenza epidemic model with optimal control	-1	unanswerable	unanswerable	2016-01-21
vzusr0ly	vzusr0ly	Background: On the present trajectory, COVID is inevitably becoming a global epidemic, leading to concerns regarding the pandemic potential in China and other countries. Objective: In this study, we use the time-dependent reproduction number (Rt) to comprise the COVID transmissibility across different countries. Methods: We used data from Jan 20, 2019, to Feb 29, 2020, on the number of newly conf…	Chinese effective control and other countries uncharted challenge against COVID-19: an epidemiological and modelling study	-1	unanswerable	unanswerable	2020-05-02
yxtdqjay	yxtdqjay	BACKGROUND: On June 11, 2009, the World Health Organization declared phase 6 of the novel influenza A/H1N1 pandemic. Although by the end of September 2009, the novel virus had been reported from all continents, the impact in most countries of the northern hemisphere has been limited. The return of the virus in a second wave would encounter populations that are still nonimmune and not vaccinated y…	Breaking the Waves: Modelling the Potential Impact of Public Health Measures to Defer the Epidemic Peak of Novel Influenza A/H1N1	-1	unanswerable	unanswerable	2009-12-21
rqn3jjsb	rqn3jjsb	Although multiple attempts have been made to mathematically model the current epidemic of SARS-CoV-2, the causative agent of coronavirus disease 2019 (COVID-19), few models have been conceived as accessible interactive tools for users from various backgrounds. The goal of this study was to develop a model that took into account the heterogeneity in contact rates within the population and to imple…	EvaluaciÃƒÂ³n de intervenciones durante la pandemia COVID-19: desarrollo de un modelo basado en subpoblaciones con distintas tasas de contacto	0	disease name: SARS-CoV-2 location: Argentina date: - R0 value: - %CI values: - method: -	[{"contribution":{"disease name": "SARS-CoV-2", "location": "Argentina", "date": "-", "R0 value": "-", "%CI values": "-", "method": "-"}}]	2021-07-24 10:00:00
85micjsd	85micjsd	Ongoing outbreak of pneumonia caused by novel coronavirus (2019-nCoV) began in December 2019 in Wuhan, China, and the number of new patients continues to increase. Even though it began to spread to many other parts of the world, such as other Asian countries, the Americas, Europe, and the Middle East, the impact of secondary outbreaks caused by exported cases outside China remains unclear. We con…	A simulation on potential secondary spread of novel coronavirus in an exported country using a stochastic epidemic seir model	1	disease name: 2019-nCoV location: a community outside China date: - R0 value: 6.5 %CI values: - method: Simulations using stochastic SEIR model	[{"contribution":{"disease name": "2019-nCoV", "location": "a community outside China", "date": "-", "R0 value": "6.5", "%CI values": "-", "method": "Simulations using stochastic SEIR model"}}]	2020
edsn0m20	edsn0m20	Infectious diseases have a huge impact on animal health, production and welfare, and human health. Understanding the role of host genetics in disease spread is important for developing disease control strategies that efficiently reduce infection incidence and risk of epidemics. While heritable variation in disease susceptibility has been targeted in livestock breeding, emerging evidence suggests …	Enhancing genetic disease control by selecting for lower host infectivity and susceptibility	-1	unanswerable	unanswerable	2019-01-16
w6i53vke	w6i53vke	Surgical resection for hilar cholangiocarcinoma is the only curative option, but low resectability rate and poor survival outcomes remain a challenge. This study was to assess the surgical resection for hilar cholangiocarcinoma and analyze the prognostic factors influencing postoperative survival. One hundred forty-two patients with hilar cholangiocarcinoma who underwent surgical resection betwee…	Surgical Resection and Prognostic Analysis of 142 Cases of Hilar Cholangiocarcinoma	-1	unanswerable	unanswerable	2017-01-07
uufeo0v1	uufeo0v1	BackgroundRepeated measurements of cross-sectional prevalence of Polymerase Chain Reaction (PCR) positivity or seropositivity provide rich insight into the dynamics of an infection. The UK Office for National Statistics (ONS) Community Infection Survey publishes such measurements for SARS-CoV-2 on a weekly basis based on testing enrolled households, contributing to situational awareness in the co…	Estimating epidemiological quantities from repeated cross-sectional prevalence measurements	-1	unanswerable	unanswerable	2022
b5nxbpcf	b5nxbpcf	Omicron, the latest SARS-CoV-2 Variant of Concern (VOC), first appeared in Africa in November 2021. At present, the question of whether a new VOC will out-compete the currently predominant variant is important for governments seeking to determine if current surveillance strategies and responses are appropriate and reasonable. Based on both virus genomes and daily-confirmed cases, we compare the a…	Assessing the Transmissibility of the New SARS-CoV-2 Variants: From Delta to Omicron	0	disease name: New SARS-CoV-2 Variants location: - date: - R0 value: - %CI values: - method: Bayesian framework and phylo-dynamics analysis	[{"contribution":{"disease name": "New SARS-CoV-2 Variants", "location": "-", "date": "-", "R0 value": "-", "%CI values": "-", "method": "Bayesian framework and phylo-dynamics analysis"}}]	2022
2jy2hjwy	2jy2hjwy	As the current COVID-19 pandemic continues to impact countries around the globe, refining our understanding of its transmission dynamics and the effectiveness of interventions is imperative. In particular, it is essential to obtain a firmer grasp on the effect of social distancing, potential individual-level heterogeneities in transmission such as age-specific infectivity, and impact of super-spr…	Characterizing super-spreading events and age-specific infectivity of COVID-19 transmission in Georgia, USA	1	disease name: COVID-19 location: State of Georgia USA date: March and early May 2020 R0 value: 2.88 %CI values: (95% C.I. [1.85, 4.9]) method: Bayesian data-augmentation techniques	[{"contribution":{"disease name": "COVID-19", "location": "State of Georgia USA", "date": "March and early May 2020", "R0 value": "2.88", "%CI values": "(95% C.I. [1.85, 4.9])", "method": "Bayesian data-augmentation techniques"}}]	2020-06-22 10:00:00		637
wnwroylq	wnwroylq	BACKGROUND: In the night of February 20, 2020, the first epidemic of the novel coronavirus disease (COVID-19) outside Asia was uncovered by the identification of its first patient in Lombardy region, Italy. In the following weeks, Lombardy experienced a sudden increase in the number of ascertained infections and strict measures were imposed to contain the epidemic spread. METHODS: We analyzed off…	The early phase of the COVID-19 epidemic in Lombardy, Italy	1	disease name: novel coronavirus disease (COVID-19) location: Pavia date: - R0 value: 2.6 %CI values: 95% CI, 2.1-3.2 method: - | disease name: novel coronavirus disease (COVID-19) location: Milan date: - R0 value: 3.3 %CI values: 95% CI, 2.9-3.8 method: -	[{"contribution":{"disease name": "novel coronavirus disease (COVID-19)", "location": "Pavia", "date": "-", "R0 value": "2.6", "%CI values": "95% CI, 2.1-3.2", "method": "-"}},{"contribution":{"disease name": "novel coronavirus disease (COVID-19)", "location": "Milan", "date": "-", "R0 value": "3.3", "%CI values": "95% CI, 2.9-3.8", "method": "-"}}]	2021-11-20		1421
nf1co6e6	nf1co6e6	Importance: The coronavirus disease 2019 (COVID-19) pandemic poses an existential threat to many US residential colleges; either they open their doors to students in September or they risk serious financial consequences. Objective: To define severe acute respiratory syndrome coronavirus 2 (SARS-CoV-2) screening performance standards that would permit the safe return of students to US residential …	Assessment of SARS-CoV-2 Screening Strategies to Permit the Safe Reopening of College Campuses in the United States	-1	unanswerable	unanswerable	2020
8fswufnx	8fswufnx	Since it first appeared in China's Guangdong Province, Severe Acute Respiratory Syndrome (SARS) has caused serious damages to many parts of the world, especially Asia. Little is known about its epidemiology. We developed a modified discrete SIR model including susceptible individuals, non-hospitalized SARS persons; hospitalized patients, cured hospital patients, and those who have died due to SAR…	The outbreak pattern of SARS cases in China as revealed by a mathematical model	1	disease name: SARS location: mainland of China date: - R0 value: 2.87 %CI values: - method: modified discrete SIR model	[{"contribution":{"disease name": "SARS", "location": "mainland of China", "date": "-", "R0 value": "2.87", "%CI values": "-", "method": "modified discrete SIR model"}}]	2007-06-16 10:00:00
e6w1u86k	e6w1u86k	Objectives. To compare the epidemic prevention ability of COVID-19 of each province in China and to evaluate the existing prevention and control capacity of each province.Methods. We established a quasi-Poisson linear mixed-effects model using the case data in cities outside Wuhan in Hubei Province, China. We adapted this model to estimate the number of potential cases in Wuhan and obtained epide…	Estimation of the Outbreak Severity and Evaluation of Epidemic Prevention Ability of COVID-19 by Province in China.	1	disease name: COVID-19 location: China date: during the initial outbreak R0 value: 3.30 %CI values: - method: quasi-Poisson linear mixed-effects model	[{"contribution":{"disease name": "COVID-19", "location": "China", "date": "during the initial outbreak", "R0 value": "3.30", "%CI values": "-", "method": "quasi-Poisson linear mixed-effects model"}}]	2020-10-15		369
ilfqof0y	ilfqof0y	The majority of cases infected with the severe acute respiratory syndrome coronavirus 2 (SARS-CoV-2) in China centered in the city of Wuhan. Despite a rapid increase in the number of cases and deaths due to the coronavirus disease 2019 (COVID-19), the epidemic was stemmed via a combination of epidemic mitigation and control measures. This study evaluates how the implementation of clinical diagnos…	Implementation of Clinical Diagnostic Criteria and Universal Symptom Survey Contributed to Lower Magnitude and Faster Resolution of the COVID-19 Epidemic in Wuhan	-1	unanswerable	unanswerable	2020
q1o8l6cz	q1o8l6cz	INTRODUCTION: Long-term exposure to pandemics like COVID-19 may increase psychological distress (e.g., peri-traumatic and post-traumatic distress) and sleep problems. Little is known about the effects of COVID-19 on peritraumatic distress, a well-documented risk factor for post-traumatic stress disorders (PTSD). The aim of this study was to investigate the association between COVID-19 risk percep…	712 COVID-19 Risk Perception, Sleep Health and Peritraumatic Distress Among New Yorkers: The NYU COVID-19 Mental Health Study	-1	unanswerable	unanswerable	2021-05-03 10:00:00
xz25mq8y	xz25mq8y	The first case of COVID-19 was detected in Brazil on 25 February 2020. We report and contextualize epidemiological, demographic and clinical findings for COVID-19 cases during the first 3 months of the epidemic. By 31 May 2020, 514,200 COVID-19 cases, including 29,314 deaths, had been reported in 75.3% (4,196 of 5,570) of municipalities across all five administrative regions of Brazil. The R0 val…	Epidemiological and clinical characteristics of the COVID-19 epidemic in Brazil.	1	disease name: COVID-19 location: Brazil date: during the first 3 months of the epidemic R0 value: 3.1 %CI values: 95% Bayesian credible interval = 2.4-5.5 method: -	[{"contribution":{"disease name": "COVID-19", "location": "Brazil", "date": "during the first 3 months of the epidemic", "R0 value": "3.1", "%CI values": "95% Bayesian credible interval = 2.4-5.5", "method": "-"}}]	2020-07-31
17la1byk	17la1byk	This paper analyses the evolution of COVID 19 disease in Cameroon over the period March 6 April 2020 using SIR model. Specifically, 1) we evaluate the basic reproduction number of the virus. 2) Determine the peak of the infection and the spread-out period of the disease. 3) Simulate the interventions of public health authorities. Data used in this study is obtained from the Ministry of Health of …	Simulating the progression of the COVID-19 disease in Cameroon using SIR models	1	disease name: COVID-19 location: Cameroon date: the period March 6 April 2020 R0 value: 1.5 %CI values: - method: SIR model	[{"contribution":{"disease name": "COVID-19", "location": "Cameroon", "date": "the period March 6 April 2020", "R0 value": "1.5", "%CI values": "-", "method": "SIR model"}}]	2020-05-21		449
l563cnzm	l563cnzm	A range of measures have been implemented to control within-school SARS-CoV-2 transmission in England, including the self-isolation of close contacts and twice weekly mass testing of secondary school pupils using lateral flow device tests (LFTs). Despite reducing transmission, isolating close contacts can lead to high levels of absences, negatively impacting pupils. To quantify pupil-to-pupil SAR…	Quantifying pupil-to-pupil SARS-CoV-2 transmission and the impact of lateral flow testing in English secondary schools	-1	unanswerable	unanswerable	2022-03-01
lwxd5bq6	lwxd5bq6	Coronavirus disease 2019 (COVID-19) is a disease caused by severe acute respiratory syndrome coronavirus 2 (SARS CoV-2). It was declared on March 11, 2020, by the World Health Organization as pandemic disease. The disease has neither approved medicine nor vaccine and has made governments and scholars search for drastic measures in combating the pandemic. Regrettably, the spread of the virus and m…	Controlling the Spread of COVID-19: Optimal Control Analysis	0	disease name: COVID-19 location: - date: - R0 value: - %CI values: - method: mathematical modeling and optimal control approach	[{"contribution":{"disease name": "COVID-19", "location": "-", "date": "-", "R0 value": "-", "%CI values": "-", "method": "mathematical modeling and optimal control approach"}}]	2020
kzzx8ni7	kzzx8ni7	Brazil is an epicentre for COVID-19 in Latin America. In this report we describe the Brazilian epidemic using three epidemiological measures: the number of infections, the number of deaths and the reproduction number. Our modelling framework requires sufficient death data to estimate trends, and we therefore limit our analysis to 16 states that have experienced a total of more than fifty deaths. …	Report 21: Estimating COVID-19 cases and reproduction number in Brazil	1	disease name: SARS-CoV-2 location: Brazil date: at the start of the epidemic R0 value: 3-4 %CI values: - method: - | disease name: SARS-CoV-2 location: Brazil date: Following non-pharmaceutical interventions R0 value: above 1 %CI values: - method: -	[{"contribution":{"disease name": "SARS-CoV-2", "location": "Brazil", "date": "at the start of the epidemic", "R0 value": "3-4", "%CI values": "-", "method": "-"}},{"contribution":{"disease name": "SARS-CoV-2", "location": "Brazil", "date": "Following non-pharmaceutical interventions", "R0 value": "above 1", "%CI values": "-", "method": "-"}}]	43969.4		797
n54arst7	n54arst7	The coronavirus disease 2019 (COVID-19) pandemic has caused the world to operate uncharacteristically for almost the last two years. Governments across the globe have taken different control measures to eradicate it. The Oxford COVID-19 Government Response Tracker (OxCGRT) provides open access data for different countries on 20 control measures, including numerous aggregated indices. This paper e…	A Hybrid Approach Toward COVID-19 Pandemic Modeling in Saudi Arabia Using the Modified Susceptible-Exposed-Infectious-Recovered Model and Open Data Sources	1	disease name: coronavirus disease 2019 (COVID-19) location: Saudi Arabia date: - R0 value: 1.119 %CI values: 0.515 to 1.892 method: modified Susceptible-Exposed-Infectious-Recovered (SEIR) epidemiology model	[{"contribution":{"disease name": "coronavirus disease 2019 (COVID-19)", "location": "Saudi Arabia", "date": "-", "R0 value": "1.119", "%CI values": "0.515 to 1.892", "method": "modified Susceptible-Exposed-Infectious-Recovered (SEIR) epidemiology model"}}]	2021
roiwpwdb	roiwpwdb	OBJECTIVE: To compare the epidemiological characteristics and transmission dynamics in relation to interventions against the COVID-19 and severe acute respiratory syndrome (SARS) outbreak in mainland China. DESIGN: Comparative study based on a unique data set of COVID-19 and SARS. SETTING: Outbreak in mainland China. PARTICIPANTS: The final database included 82 858 confirmed cases of COVID-19 and…	Outbreak of COVID-19 and SARS in mainland China: a comparative study based on national surveillance data	-1	unanswerable	unanswerable	2020
aakiwatt	aakiwatt	Accurate estimation of the parameters characterising infectious disease transmission is vital for optimising control interventions during epidemics. A valuable metric for assessing the current threat posed by an outbreak is the time-dependent reproduction number, i.e. the expected number of secondary cases caused by each infected individual. This quantity can be estimated using data on the number…	Improved inference of time-varying reproduction numbers during infectious disease outbreaks	-1	unanswerable	unanswerable	2019-08-26 10:00:00
0mx8gpap	0mx8gpap	We estimate an actual number of infected cases in Palestine based on the 18-day effect from infection to death. We find that the number of cases in April 22 varies between 506 and 2 026 infected cases. We also focus on the reproductive number in Palestine based on population dynamics with two SEIR models. Dataset is from 5 March to 22 April 2020. With a transmission rate equal to 4.55 106, on May…	COVID-19 data analysis and modeling in Palestine	1	disease name: COVID-19 location: Palestine date: 5 March to 22 April 2020 R0 value: 1.54 %CI values: - method: two SEIR models	[{"contribution":{"disease name": "COVID-19", "location": "Palestine", "date": "5 March to 22 April 2020", "R0 value": "1.54", "%CI values": "-", "method": "two SEIR models"}}]	2020-04-29 10:00:00
14bhv388	14bhv388	Interventions targeting symptomatic hosts and their contacts were successful in bringing the 2003 SARS pandemic under control. In contrast, the COVID-19 pandemic has been harder to contain, partly because of its wide spectrum of symptoms in infectious hosts. Current evidence suggests that individuals can transmit the novel coronavirus while displaying few symptoms. Here, we show that the proporti…	Time from symptom onset to hospitalisation of coronavirus disease 2019 (Covid-19) cases: Implications for the proportion of transmissions from infectors with few symptoms	-1	unanswerable	unanswerable	2020
px0twvhs	px0twvhs	The COVID-19 outbreak has been a serious public health threat worldwide. We use individually documented case descriptions of COVID-19 from China (excluding Hubei Province) to estimate the distributions of the generation time, incubation period, and periods from symptom onset to isolation and to diagnosis. The recommended 14-day quarantine period may lead to a 6.7% failure for quarantine. We recom…	Transmission characteristics of the COVID-19 outbreak in China: a study driven by data	1	disease name: COVID-19 location: China (excluding Hubei Province) date: - R0 value: 1.54 %CI values: - method: -	[{"contribution":{"disease name": "COVID-19", "location": "China (excluding Hubei Province)", "date": "-", "R0 value": "1.54", "%CI values": "-", "method": "-"}}]	2020-03-01 05:00:00
bi1gwoj8	bi1gwoj8	Background Brazil is one of the countries worst affected by the COVID-19 pandemic with over 20 million cases and 557,000 deaths reported by August 2021. Comparison of real-time local COVID-19 data between areas is essential for understanding transmission, measuring the effects of interventions, and predicting the course of the epidemic, but are often challenging due to different population sizes …	Tracking the emergence of disparities in the subnational spread of COVID-19 in Brazil using an online application for real-time data visualisation: A longitudinal analysis	-1	unanswerable	unanswerable	2021
78mae6o3	78mae6o3	Epidemiological and molecular characterization of SARS-CoV-2 is essential for identifying the source of the virus and for effective control of the spread of local strains. We estimated case fatality rate, cumulative recovery number, basic reproduction number (R0) and future incidence of COVID-19 in Bangladesh. We illustrated the spatial distribution of cases throughout the country. We performed p…	Assessment of basic reproduction number (R0), spatial and temporal epidemiological determinants, and genetic characterization of SARS-CoV-2 in Bangladesh	1	disease name: COVID-19 location: Bangladesh date: - R0 value: 1.173 %CI values: - method: Exponential Growth	[{"contribution":{"disease name": "COVID-19", "location": "Bangladesh", "date": "-", "R0 value": "1.173", "%CI values": "-", "method": "Exponential Growth"}}]	2021
5owe60kv	5owe60kv	We investigate the problem of estimating the distribution of the individual reproduction number governing the COVID-19 pandemic. Under the assumption that this random variable follows a Negative Binomial distribution, we focus on constructing estimators of the parameters of this distribution using reported infection data and taking into account issues like under-reporting or the time behavior of …	Estimation of the Distribution of the Individual Reproduction Number: The Case of the COVID-19 Pandemic	-1	unanswerable	unanswerable	2021
3bhosnw5	3bhosnw5	BACKGROUND: To control the COVID-19 outbreak in Japan, sports and entertainment events were canceled and schools were closed throughout Japan from February 26 through March 19. That policy has been designated as voluntary event cancellation and school closure (VECSC). OBJECT: This study assesses VECSC effectiveness based on predicted outcomes. METHODS: A simple susceptibleÃ¢â‚¬â€œinfectedÃ¢â‚¬â€œ…	Effects of voluntary event cancellation and school closure as countermeasures against COVID-19 outbreak in Japan	1	disease name: COVID-19 location: Japan date: January 14- March 26 R0 value: 2.534 [2.449, 2.598] %CI values: - method: Simple susceptible–infected–recovered model	[{"contribution":{"disease name": "COVID-19", "location": "Japan", "date": "January 14- March 26", "R0 value": "2.534 [2.449, 2.598]", "%CI values": "-", "method": "Simple susceptible–infected–recovered model"}}]	2020-12-21 05:00:00		1119
3h0clh5h	3h0clh5h	INTRODUCTION: This study was planned to assess the trends of epidemiological indicators and demographic determinants related to the COVID-19 in India. METHODOLOGY: This was a descriptive analysis of the COVID-19 cases and their outcomes between 1st March to 31st May 2020 in India. Unpaired t-test and ANOVA were used to determine the statistical differences. Linear regression models were prepared …	Trends of Epidemiological and Demographic Indicators of COVID-19 in India	1	disease name: COVID-19 location: India date: 1st March to 31st May 2020 R0 value: 1.72 %CI values: - method: Linear regression models	[{"contribution":{"disease name": "COVID-19", "location": "India", "date": "1st March to 31st May 2020", "R0 value": "1.72", "%CI values": "-", "method": "Linear regression models"}}]	2021
t44zt8vc	t44zt8vc	The aim of this work is to study an over-dispersed SEIQR infectious disease and obtain optimal methods of contact tracing. A prototypical example of such a disease is that of the current SARS-CoV-2 pandemic. In consequence, this study is immediately applicable to the current health crisis. In this paper, we introduce both a discrete and continuous model for various modes of contact tracing. From …	An analysis of contact tracing protocol in an over-dispersed SEIQR Covid-like disease	0	disease name: over-dispersed SEIQR Covid-like disease location: - date: - R0 value: - %CI values: - method: both a discrete and continuous model for various modes of contact tracing	[{"contribution":{"disease name": "over-dispersed SEIQR Covid-like disease", "location": "-", "date": "-", "R0 value": "-", "%CI values": "-", "method": "both a discrete and continuous model for various modes of contact tracing"}}]	2021-12-14 05:00:00
2ghdpxsn	2ghdpxsn	BACKGROUNDShortness of breath, chest pain, and palpitations occur as post-acute sequelae of COVID-19 (PASC), but whether symptoms are associated with echocardiographic abnormalities, cardiac biomarkers, or markers of systemic inflammation remains unknown. METHODSIn a cross-sectional analysis, we assessed symptoms, performed echocardiograms, and measured biomarkers among adults >8 weeks after PCR-…	Role of antibodies, inflammatory markers, and echocardiographic findings in post-acute cardiopulmonary symptoms after SARS-CoV-2 infection	-1	unanswerable	unanswerable	2021
y7fivzzc	y7fivzzc	We show results for the contact process on Barabasi networks. The contact process is a model for an epidemic spreading without permanent immunity that has an absorbing state. For finite lattices, the absorbing state is the true stationary state, which leads to the need for simulation of quasi-stationary states, which we did in two ways: reactivation by inserting spontaneous infected individuals, …	Phase Diagram of the Contact Process on Barabasi-Albert Networks	-1	unanswerable	unanswerable	2022-01-21 05:00:00
s496bcpc	s496bcpc	The Bioethics Committee of Belarus and the local ethics committee of the St. Petersburg Pasteur Institute approved the study. Selection of participants was carried out using a questionnaire method and online technology (internet, cloud server). Volunteers were randomized into seven age groups (years of age): 1Ã¢â‚¬â€œ17;18Ã¢â‚¬â€œ29;30Ã¢â‚¬â€œ39;40Ã¢â‚¬â€œ49;50Ã¢â‚¬â€œ59;60Ã¢â‚¬â€œ69;and 70+. Reg…	HERD IMMUNITY to SARS-CoV-2 among the POPULATION of the REPUBLIC of BELARUS AMID the COVID-19 PANDEMIC	1	disease name: COVID-19 location: Republic of Belarus date: - R0 value: 1.3 %CI values: - method: Questionnaire method and online technology (internet, cloud server)	[{"contribution":{"disease name": "COVID-19", "location": "Republic of Belarus", "date": "-", "R0 value": "1.3", "%CI values": "-", "method": "Questionnaire method and online technology (internet, cloud server)"}}]	2021
4ystayoh	4ystayoh	Objective: Measure the effects of the Tier system on the COVID-19 pandemic in the UK between the first and second national lockdowns, before the emergence of the B.1.1.7 variant of concern. Design: Modelling study combining estimates of the real-time reproduction number Rt (derived from UK case, death and serological survey data) with publicly available data on regional non-pharmaceutical interve…	Impact of the Tier system on SARS-CoV-2 transmission in the UK between the first and second national lockdowns	-1	unanswerable	unanswerable	2021-02-24 05:00:00		309
eoioxy6g	eoioxy6g	In the attempt to counter the second COVID-19 wave in autumn 2020, the Italian government introduced a unique countrywide system of physical distancing measures organized in progressively restrictive tiers (coded as yellow, orange, and red) imposed on a regional basis according to epidemiological risk assessments. This followed a set of other scattered or limited measures described in full detail…	The tiered restrictions enforced in November 2020 did not impact the epidemiology of the second wave of COVID-19 in Italy.	-1	unanswerable	unanswerable	2021-09-13
fm7f8i3i	fm7f8i3i	OBJECTIVES: We aim to estimate the impact of various mitigation strategies on COVID-19 transmission in a US jail beyond those offered in national guidelines. DESIGN: We developed a stochastic dynamic transmission model of COVID-19. SETTING: One anonymous large urban US jail. PARTICIPANTS: Several thousand staff and incarcerated individuals. INTERVENTIONS: There were four intervention phases durin…	Effectiveness of interventions to reduce COVID-19 transmission in a large urban jail: a model-based analysis	1	disease name: COVID-19 location: US jail date: For the first outbreak phase R0 value: 8.44 %CI values: (95% credible interval (CrI): 5.00 to 13.10) method: next generation method | disease name: COVID-19 location: US jail date: phase 2 R0 value: 3.64 %CI values: (95% CrI: 2.43 to 5.11) method: next generation method | disease name: COVID-19 location: US jail date: phase 3 R0 value: 1.72 %CI value…	[{"contribution":{"disease name": "COVID-19", "location": "US jail", "date": "For the first outbreak phase", "R0 value": "8.44", "%CI values": "(95% credible interval (CrI): 5.00 to 13.10)", "method": "next generation method"}},{"contribution":{"disease name": "COVID-19", "location": "US jail", "date": "phase 2", "R0 value": "3.64", "%CI values": "(95% CrI: 2.43 to 5.11)", "method": "next generat…	2021		397
19zqt8cj	19zqt8cj	OBJECTIVE: To assess whether the basic reproduction number (R(0)) of COVID-19 is different across countries and what national-level demographic, social, and environmental factors other than interventions characterize initial vulnerability to the virus. METHODS: We fit logistic growth curves to reported daily case numbers, up to the first epidemic peak, for 58 countries for which 16 explanatory co…	Social, economic, and environmental factors influencing the basic reproduction number of COVID-19 across countries	1	disease name: COVID-19 location: 58 countries date: - R0 value: 1.70 (S.D. 0.57) %CI values: - method: fit logistic growth curves to reported daily case numbers, up to the first epidemic peak | disease name: COVID-19 location: Ghana date: - R0 value: 1.1 %CI values: - method: fit logistic growth curves to reported daily case numbers, up to the first epidemic peak | disease name: COVID-19 location…	[{"contribution":{"disease name": "COVID-19", "location": "58 countries", "date": "-", "R0 value": "1.70 (S.D. 0.57)", "%CI values": "-", "method": "fit logistic growth curves to reported daily case numbers, up to the first epidemic peak"}},{"contribution":{"disease name": "COVID-19", "location": "Ghana", "date": "-", "R0 value": "1.1", "%CI values": "-", "method": "fit logistic growth curves to …	2021-06-09		1128
vqubtgsf	vqubtgsf	We propose a variational model for computing the effective reproduction number (ERN) of SARS-CoV-2 from the daily count of incident cases. This computation only requires the knowledge of the serial interval. The ERN estimate is made through the minimization of a functional that includes: (i) the adjustment of the incidence curve using an epidemiological model, (ii) the regularity of the estimatio…	A variational model for computing the effective reproduction number of SARS-CoV-2	-1	unanswerable	unanswerable	2020-08-04 10:00:00
9bi6pobg	9bi6pobg	We evaluated the impact of early social distancing on the COVID-19 transmission in the Sao Paulo metropolitan area. Using an age-stratified SEIR model, we determined the time-dependent reproductive number, and forecasted the ICU beds necessary to tackle this epidemic. Within 60 days, these measures might prevent 89,133 deaths.	The impact of early social distancing at COVID-19 Outbreak in the largest Metropolitan Area of Brazil.	-1	unanswerable	unanswerable	2020-04-08 10:00:00
6a2bt3mg	6a2bt3mg	This is the first study on omicron genomes from India to focus on phylodynamics and phylogenomics trait to provide an insight into the evolution of omicron variants. We analyzed 564 genomes deposited to GISAID database from various states of India. Pangolin COVID-19 Lineage Assigner tool was used to determine lineage assignment of all retrieved genomes. A Maximum likelihood (MLE) tree constructio…	Analyses of Omicron genomes from India reveal BA.2 as a more transmissible variant	1	disease name: COVID-19(Omicron genomes) location: India date: - R0 value: 2.445 %CI values: - method: Maximum likelihood (MLE) tree	[{"contribution":{"disease name": "COVID-19(Omicron genomes)", "location": "India", "date": "-", "R0 value": "2.445", "%CI values": "-", "method": "Maximum likelihood (MLE) tree"}}]	2022
uuaoi0ky	uuaoi0ky	Objectives Nursing homes (NHs) are important health care and residential environments for the growing number of frail older adults. The COVID-19 pandemic highlighted the vulnerability of NHs as they became COVID-19 hotspots. This study examines the associations of NH design with COVID-19 cases, deaths, and transmissibility, and provides relevant design recommendations. Design A cross-sectional, n…	Nursing Home Design and COVID-19: Implications for Guidelines and Regulation	0	disease name: COVID-19 location: Nursing homes (NHs) in the US date: - R0 value: - %CI values: - method: Zero-inflated negative binomial models	[{"contribution":{"disease name": "COVID-19", "location": "Nursing homes (NHs) in the US", "date": "-", "R0 value": "-", "%CI values": "-", "method": "Zero-inflated negative binomial models"}}]	2021-12-24 05:00:00
5jv2wxt8	5jv2wxt8	Purpose - This paper investigates if the existing degree of students' acceptance and use of mobile or m-learning may face the online shift determined by SARS-CoV-2. Based on the extended unified theory of acceptance and use of technology (UTAUT2), a new comprehensive model, SD-UTAUT (social distancing-UTAUT), is developed to better understand relationships between the original constructs, plus pe…	Mobile learning acceptance and use in higher education during social distancing circumstances: an expansion and customization of UTAUT2	-1	unanswerable	unanswerable	2021
hh45680z	hh45680z	The first wave of COVID-19 epidemic began in late January in Malaysia and ended with a very small final size. The second wave of infections broke out in late February and grew rapidly in the first 3 weeks. Authorities in the country responded quickly with a series of control strategies collectively known as the Movement Control Order (MCO) with different levels of intensity matching the progressi…	Characteristics of COVID-19 epidemic and control measures to curb transmission in Malaysia	-1	unanswerable	unanswerable	2020
4ydv4khf	4ydv4khf	Motivated by the quick control in Wuhan, China, and the rapid spread in other countries of COVID-19, we investigate the questions that what is the turning point in Wuhan by quantifying the variety of basic reproductive number after the lockdown city. The answer may help the world to control the COVID-19 epidemic. A modified SEIR model is used to study the COVID-19 epidemic in Wuhan city. Our mode…	The effects of the clinical symptoms pneumonia-confirmation strategy of the COVID-19 epidemic in Wuhan, China	1	disease name: COVID-19 location: Wuhan, China date: Jan 25 to Mar 10, 2020 R0 value: 1.5517 %CI values: 95% CI 1.1716-4.4283 method: Modified SEIR Model | disease name: COVID-19 location: Wuhan, China date: Feb 12 to Mar 10 R0 value: 0.4738 %CI values: 95% CI 0.0997-0.8370 method: Modified SEIR Model	[{"contribution":{"disease name": "COVID-19", "location": "Wuhan, China", "date": "Jan 25 to Mar 10, 2020", "R0 value": "1.5517", "%CI values": "95% CI 1.1716-4.4283", "method": "Modified SEIR Model"}},{"contribution":{"disease name": "COVID-19", "location": "Wuhan, China", "date": "Feb 12 to Mar 10", "R0 value": "0.4738", "%CI values": "95% CI 0.0997-0.8370", "method": "Modified SEIR Model"}}]	2020		1257
gi40crwr	gi40crwr	The ultimate aim of the article is to predict COVID-19 virus inter-cellular behavioral dynamics using an infection model with a quarantine compartment. Internal viral dynamics and stability attributes are thoroughly investigated around stable equilibrium states to probe possible ways in reducing rapid spread by incorporating fractional-order components into epidemic systems. Furthermore, a fracti…	Fractional dynamical probes in COVID-19 model with control interventions: a comparative assessment of eight most affected countries	-1	unanswerable	unanswerable	2022-03-19 05:00:00
s6qh85o4	s6qh85o4	Broad-spectrum antivirals are powerful weapons against dangerous viruses where no specific therapy exists, as in the case of the ongoing SARS-CoV-2 pandemic. We discovered that a lysine- and arginine-specific supramolecular ligand (CLR01) destroys enveloped viruses, including HIV, Ebola, and Zika virus, and remodels amyloid fibrils in semen that promote viral infection. Yet, it is unknown how CLR…	Supramolecular Mechanism of Viral Envelope Disruption by Molecular Tweezers	-1	unanswerable	unanswerable	2020
ve3v4bz0	ve3v4bz0	OBJECTIVES: The recent discoveries of phylogenetically confirmed COVID-19 reinfection cases worldwide, together with studies suggesting that antibody titres decrease over time, raise the question of what course the epidemic trajectories may take if immunity were really to be temporary in a significant fraction of the population. The objective of this study is to answer this question. METHODS: We …	Impact of reproduction number on multiwave spreading dynamics of COVID-19 with temporary immunity: a mathematical model	-1	unanswerable	unanswerable	2021-01-11 05:00:00
ckay4ufw	ckay4ufw	This study shows that the disease free equilibrium (E_0 ) for COVID-19 coronavirus does not satisfy the criteria for a locally or globally asymptotic stability. This implies that as a pandemic as declared by WHO (2020) the COVID-19 coronavirus does not have a curative vaccine yet and precautionary measures are advised through quarantine and observatory procedures. Also, the Basic Reproductive num…	MATHEMATICAL PREDICTIONS FOR COVID-19 AS A GLOBAL PANDEMIC	-1	unanswerable	unanswerable	2020-03-24 05:00:00
n11fcwmw	n11fcwmw	Teaser: Our review found the average R0 for 2019-nCoV to be 3.28, which exceeds WHO estimates of 1.4 to 2.5.	The reproductive number of COVID-19 is higher compared to SARS coronavirus	1	disease name: COVID-19 location: - date: - R0 value: 3.28 %CI values: - method: -	[{"contribution":{"disease name": "COVID-19", "location": "-", "date": "-", "R0 value": "3.28", "%CI values": "-", "method": "-"}}]	2020-02-13
gp2cjb9i	gp2cjb9i	This study estimates the COVID-19 infection network from actual data and draws on implications for policy and research. Using contact tracing information of 3283 confirmed patients in Seoul metropolitan areas from January 20, 2020 to July 19, 2020, this study created an infection network and analyzed its structural characteristics. The main results are as follows: (i) out-degrees follow an extrem…	A social network analysis of the spread of COVID-19 in South Korea and policy implications	-1	unanswerable	unanswerable	2021
rcbw54xc	rcbw54xc	Background: In the beginning of January 2020, new unknown virus pneumonia cases started to emerge in local hospitals in Wuhan, China. This virus epidemic quickly became a public health emergency of international concern by the WHO. Enormous amount of medical supplies as well as healthcare personals from other provinces were mobilized to support Wuhan. This current work tent to help people underst…	A model simulation study on effects of intervention measures in Wuhan COVID-19 epidemic	-1	unanswerable	unanswerable	2020-02-18 05:00:00
zqtlqbrr	zqtlqbrr	The current outbreak of the novel coronavirus also known as COVID-19 was declared as a public health emergency by the WHO where over a million people have been affected by the disease with over 50000 deaths till date. Social distancing is a method to minimize crowd interactions and prevent the spread of disease within groups of people. This is a common practice which has been carried out over gen…	COVID-19 and Importance of Social Distancing	-1	unanswerable	unanswerable	2020
41lfsedz	41lfsedz	In the absence of neither an effective treatment or vaccine and with an incomplete understanding of the epidemiological cycle, Govt. has implemented a nationwide lockdown to reduce COVID-19 transmission in India. To study the effect of social distancing measure, we considered a new mathematical model on COVID-19 that incorporates lockdown effect. By validating our model to the data on notified ca…	Assessment of Lockdown Effect in Some States and Overall India: A Predictive Mathematical Study on COVID-19 Outbreak	0	disease name: COVID-19 location: India date: - R0 value: - %CI values: - method: mathematical model	[{"contribution":{"disease name": "COVID-19", "location": "India", "date": "-", "R0 value": "-", "%CI values": "-", "method": "mathematical model"}}]	2020-07-08 10:00:00
66gjg9gd	66gjg9gd	The COVID-19 pandemic has brought more widespread attention to the basic reproductive number (R(o)), an epidemiologic measurement. A lesser-known measure of virologic infectivity is the particle-to-plaque ratio (P:PFU). We suggest that comparison between the two parameters may assist in better understanding viral transmission dynamics.	The basic reproductive number and particle-to-plaque ratio: comparison of these two parameters of viral infectivity	-1	unanswerable	unanswerable	2021-04-30 10:00:00
14oa7nsa	14oa7nsa	Influenza and COVID-19 are infectious diseases with significant burdens. Information and awareness on preventative techniques can be spread through the use of social media, which has become an increasingly utilized tool in recent years. This study developed a dynamic transmission model to investigate the impact of social media, particularly tweets via the social networking platform, Twitter on th…	Social media effectiveness as a humanitarian response to mitigate influenza epidemic and COVID-19 pandemic	-1	unanswerable	unanswerable	2021
q70w5rpa	q70w5rpa	INTRODUCTION: Severe acute respiratory syndrome coronavirus 2 has been transmitted to more than 200 countries, with 92.5 million cases and 1,981,678 deaths. METHODS: This study applied a mathematical model to estimate the increase in the number of cases in SÃƒÂ£o Paulo state, Brazil during four epidemic periods and the subsequent 300 days. We used different types of dynamic transmission models to…	Modeling transmission dynamics of severe acute respiratory syndrome coronavirus 2 in SÃƒÂ£o Paulo, Brazil	1	disease name: Severe acute respiratory syndrome coronavirus 2 location: Sao Paulo, Brazil date: - R0 value: 3.59 %CI values: 95% confidence interval [CI]: 3.48 - 3.72 method: model that incorporated multiple transmission pathways and an environmental class that represented the pathogen concentration in the environmental reservoir	[{"contribution":{"disease name": "Severe acute respiratory syndrome coronavirus 2", "location": "Sao Paulo, Brazil", "date": "-", "R0 value": "3.59", "%CI values": "95% confidence interval [CI]: 3.48 - 3.72", "method": "model that incorporated multiple transmission pathways and an environmental class that represented the pathogen concentration in the environmental reservoir"}}]	2021
6duvncad	6duvncad	Severe acute respiratory syndrome coronavirus 2 is the causative agent of the ongoing coronavirus disease pandemic. Initial estimates of the early dynamics of the outbreak in Wuhan, China, suggested a doubling time of the number of infected persons of 6-7 days and a basic reproductive number (R0) of 2.2-2.7. We collected extensive individual case reports across China and estimated key epidemiolog…	High Contagiousness and Rapid Spread of Severe Acute Respiratory Syndrome Coronavirus 2	1	disease name: Severe acute respiratory syndrome coronavirus 2 location: Wuhan, China date: - R0 value: 5.7 %CI values: (95% CI 3.8-8.9) method: mathematical modeling approaches	[{"contribution":{"disease name": "Severe acute respiratory syndrome coronavirus 2", "location": "Wuhan, China", "date": "-", "R0 value": "5.7", "%CI values": "(95% CI 3.8-8.9)", "method": "mathematical modeling approaches"}}]	2020
hyc93ybc	hyc93ybc	Background. Since the emergence of Middle East Respiratory Syndrome Coronavirus (MERS-CoV) in 2012, more than 1,300 laboratory confirmed cases of MERS-CoV infections have been reported in Asia, North Africa, and Europe by July 2015. The recent MERS-CoV nosocomial outbreak in South Korea quickly became the second largest such outbreak with 186 total cases and 36 deaths in a little more than one mo…	2015 Middle East Respiratory Syndrome Coronavirus (MERS-CoV) nosocomial outbreak in South Korea: insights from modeling	1	disease name: MERS-CoV location: South Korea date: - R0 value: 7.0 - 19.3 %CI values: - method: Richards model	[{"contribution":{"disease name": "MERS-CoV", "location": "South Korea", "date": "-", "R0 value": "7.0 - 19.3", "%CI values": "-", "method": "Richards model"}}]	2015-12-17 05:00:00
uqytes4n	uqytes4n	BACKGROUND: Schools were closed in England on 4 January 2021 as part of increased national restrictions to curb transmission of SARS-CoV-2. The UK government reopened schools on 8 March. Although there was evidence of lower individual-level transmission risk amongst children compared to adults, the combined effects of this with increased contact rates in school settings and the resulting impact o…	Estimating the impact of reopening schools on the reproduction number of SARS-CoV-2 in England, using weekly contact survey data	1	disease name: SARS-CoV-2 location: England date: weekly from March 2020 R0 value: baseline of 0.8, we estimated a likely increase to between 1.0 and 1.5 with the reopening of all schools or to between 0.9 and 1.2 reopening primary or secondary schools %CI values: - method: measured social contacts of > 5000 participants	[{"contribution":{"disease name": "SARS-CoV-2", "location": "England", "date": "weekly from March 2020", "R0 value": "baseline of 0.8, we estimated a likely increase to between 1.0 and 1.5 with the reopening of all schools or to between 0.9 and 1.2 reopening primary or secondary schools", "%CI values": "-", "method": "measured social contacts of > 5000 participants"}}]	2021-09-10
tg5wbwf9	tg5wbwf9	Coronavirus disease 2019 (COVID-19) is a novel human respiratory disease caused by the SARS-CoV-2 virus. Asymptomatic carriers of the virus display no clinical symptoms but are known to be contagious. Recent evidence reveals that this sub-population, as well as persons with mild, represent a major contributor in the propagation of COVID-19. The asymptomatic sub-population frequently escapes detec…	Investigating the Impact of Asymptomatic Carriers on COVID-19 Transmission	-1	unanswerable	unanswerable	2020-03-20 05:00:00
lnoidb51	lnoidb51	ABSTRACT The severe acute respiratory syndrome coronavirus 2 has caused a worldwide pandemic. Control measures differ among countries and have a varying degree of effectiveness, which requires assessment. To evaluate the effectiveness of public health interventions of the coronavirus disease 2019 (COVID-19) in Guangzhou by 3 periods according to interventions: January 7 to 22 (no intervention), J…	Transmission dynamics and successful control measures of SARS-CoV-2 in the mega-size city of Guangzhou, China.	1	disease name: COVID-19 location: Guangzhou, China date: January 7 to 22 (no intervention) R0 value: 0.9 , fluctuated below 1.0 before January 22 except for January 14 %CI values: (95% confidence interval, 0.5-1.4) method: -	[{"contribution":{"disease name": "COVID-19", "location": "Guangzhou, China", "date": "January 7 to 22 (no intervention)", "R0 value": "0.9 , fluctuated below 1.0 before January 22 except for January 14", "%CI values": "(95% confidence interval, 0.5-1.4)", "method": "-"}}]	2021-12-03 05:00:00
aawzysnh	aawzysnh	In this article, Coronavirus Disease COVID-19 transmission dynamics were studied to examine the utility of the SEIR compartmental model, using two non-singular kernel fractional derivative operators. This method was used to evaluate the complete memory effects within the model. The Caputo-Fabrizio (CF) and Atangana-Baleanu models were used predicatively, to demonstrate the possible long-term traj…	Mathematical Modeling of Coronavirus Disease COVID-19 Dynamics using CF and ABC Non-Singular Fractional Derivatives	-1	unanswerable	unanswerable	2021
mr49gynz	mr49gynz	BACKGROUND: The coronavirus disease 2019 (COVID-19) outbreak has seriously endangered the health and lives of Chinese people. In this study, we predicted the COVID-19 epidemic trend and estimated the efficacy of several intervention strategies in the mainland of China. METHODS: According to the COVID-19 epidemic status, we constructed a compartmental model. Based on reported data from the Nationa…	Transmission patterns of COVID-19 in the mainland of China and the efficacy of different control strategies: a data- and model-driven study	-1	unanswerable	unanswerable	2020
e3522foi	e3522foi	IMPORTANCE: Measles cases and outbreaks continue to occur in the United States after the introduction of measles from endemic settings. OBJECTIVE: To discern the factors associated with measles transmission in the United States after measles had been eliminated. DESIGN, SETTING, AND PARTICIPANTS: This cross-sectional study was conducted from January 1, 2001, to December 31, 2017, in the United St…	Factors Associated With Measles Transmission in the United States During the Postelimination Era	-1	unanswerable	unanswerable	2019-11-18
bl35xu1z	bl35xu1z	The application, timing, and duration of lockdown strategies during a pandemic remain poorly quantified with regards to expected public health outcomes. Previous projection models have reached conflicting conclusions about the effect of complete lockdowns on COVID-19 outcomes. We developed a stochastic continuous-time Markov chain (CTMC) model with eight states including the environment (SEAMHQRD…	Modeling the Effect of Lockdown Timing as a COVID-19 Control Measure in Countries with Differing Social Contacts	0	disease name: COVID-19 location: Canada, China, Mexico, Niger date: - R0 value: - %CI values: - method: Stochastic continuous-time Markov chain (CTMC) model	[{"contribution":{"disease name": "COVID-19", "location": "Canada, China, Mexico, Niger", "date": "-", "R0 value": "-", "%CI values": "-", "method": "Stochastic continuous-time Markov chain (CTMC) model"}}]	2020-11-16 05:00:00
t2x4yfrv	t2x4yfrv	By proposing a varying coefficient Susceptible-Infected-Removal model (vSIR), we track the epidemic of COVID-19 in 30 provinces in China and 15 cities in Hubei province, the epicenter of the outbreak. It is found that the spread of COVID-19 has been significantly slowing down within the two weeks from January 27 to February 10th with 87.0% and 84.3% reductions in the reproduction number R0 among …	Tracking and Predicting COVID-19 Epidemic in China Mainland	-1	unanswerable	unanswerable	2020-02-20
mushg30y	mushg30y	The 2019-2020 pandemic of atypical pneumonia (COVID-19) caused by the virus SARS-CoV-2 has spread globally and has the potential to infect large numbers of people in every country. Estimating the country-specific basic reproductive ratio is a vital first step in public-health planning. The basic reproductive ratio (R(0)) is determined by both the nature of pathogen and the network of human contac…	Estimation of country-level basic reproductive ratios for novel Coronavirus (SARS-CoV-2/COVID-19) using synthetic contact matrices	0	disease name: atypical pneumonia (COVID-19) location: 152 countries date: - R0 value: - %CI values: - method: transmission model combining age-stratified contact frequencies with age-dependent susceptibility, probability of clinical symptoms, and transmission from asymptomatic (or mild) cases	[{"contribution":{"disease name": "atypical pneumonia (COVID-19)", "location": "152 countries", "date": "-", "R0 value": "-", "%CI values": "-", "method": "transmission model combining age-stratified contact frequencies with age-dependent susceptibility, probability of clinical symptoms, and transmission from asymptomatic (or mild) cases"}}]	2020-07-02
xxbyxokp	xxbyxokp	Contact tracing is critical to controlling COVID-19, but most protocols only "forward-trace" to notify people who were recently exposed. Using a stochastic branching-process model, we find that "bidirectional" tracing to identify infector individuals and their other infectees robustly improves outbreak control. In our model, bidirectional tracing more than doubles the reduction in effective repro…	Bidirectional contact tracing could dramatically improve COVID-19 control	-1	unanswerable	unanswerable	2021
zc7oxui5	zc7oxui5	Introduction The first reported UK case of COVID-19 occurred on 31 January 2020, and a lockdown of unknown duration began on 24 March. One model to forecast disease spread depends on clinical parameters and transmission rates. Output includes the basic reproduction number R0 and the log growth rate r in the exponential phase. Methods UK data on reported deaths is used to estimate r. A likelihood …	COVID-19 UK Lockdown Forecasts and R0	1	disease name: COVID-19 location: UK date: - R0 value: 5.81 %CI values: 90% CI (5.08 , 6.98) method: Parameter samples from the Metropolis-Hastings algorithm	[{"contribution":{"disease name": "COVID-19", "location": "UK", "date": "-", "R0 value": "5.81", "%CI values": "90% CI (5.08 , 6.98)", "method": "Parameter samples from the Metropolis-Hastings algorithm"}}]	2020-04-10 10:00:00		1124
4h4q9h02	4h4q9h02	BACKGROUND: The high prevalence of dengue in Taiwan and the consecutive large dengue outbreaks in the period 2014Ã¢â‚¬â€œ2015 suggest that current control interventions are suboptimal. Understanding the effect of control effort is crucial to inform future control strategies. OBJECTIVES: We developed a framework to measure season-based health burden risk from 2001 to 2014. We reconstructed various…	Assessing health burden risk and control effect on dengue fever infection in the southern region of Taiwan	1	disease name: dengue location: Taiwan date: 2001 to 2014 R0 value: 2.37 %CI values: - method: -	[{"contribution":{"disease name": "dengue", "location": "Taiwan", "date": "2001 to 2014", "R0 value": "2.37", "%CI values": "-", "method": "-"}}]	2018-09-06 10:00:00
3e31i6sn	3e31i6sn	BACKGROUND: In South Korea, an outbreak of Middle East respiratory syndrome (MERS) occurred in 2015. It was the second largest MERS outbreak. As a result of the outbreak in South Korea, 186 infections were reported, and 36 patients died. At least 16,693 people were isolated with suspicious symptoms. This paper estimates the basic reproduction number of the MERS coronavirus (CoV), using data on th…	Estimation of basic reproduction number of the Middle East respiratory syndrome coronavirus (MERS-CoV) during the outbreak in South Korea, 2015	1	disease name: Middle East respiratory syndrome coronavirus (MERS-CoV) location: South Korea date: - R0 value: 8.0977 %CI values: - method: employ data from the 2015 South Korea MERS outbreak and the susceptible-infected-removed (SIR) model, a mathematical model that uses a set of ordinary differential equations (ODEs)	[{"contribution":{"disease name": "Middle East respiratory syndrome coronavirus (MERS-CoV)", "location": "South Korea", "date": "-", "R0 value": "8.0977", "%CI values": "-", "method": "employ data from the 2015 South Korea MERS outbreak and the susceptible-infected-removed (SIR) model, a mathematical model that uses a set of ordinary differential equations (ODEs)"}}]	2017-06-13 10:00:00
nr5fwzk6	nr5fwzk6	The coronavirus has a high basic reproduction number (R0) and has caused the global COVID-19 pandemic. Governments are implementing lockdowns that are leading to economic fallout in many countries. Policy makers can take better decisions if provided with the indicators connected with the disease spread. This study is aimed to cluster the countries using social, economic, health and environmental …	Clustering of Countries for COVID-19 Cases based on Disease Prevalence, Health Systems and Environmental Indicators	-1	unanswerable	unanswerable	2021-02-19 05:00:00
x4rw8vmh	x4rw8vmh	Due to COVID-19, many countries including Japan have implemented a suspension of economic activities for infection control. It has contributed to reduce the transmission of COVID-19 but caused severe economic losses. Today, several promising vaccines have been developed and are already being distributed in some countries. Therefore, we evaluated various vaccine and intensive countermeasure strate…	Effective vaccine allocation strategies, balancing economy with infection control against COVID-19 in Japan	-1	unanswerable	unanswerable	2021-09-02 10:00:00
g67c9wqr	g67c9wqr	Identifying actual risk zones in a country where the overall test positive rate (TPR) is higher than 5% is crucial to contain the pandemic. However, TPR-based risk zoning methods are debatable since they do not consider the rate of infection in an area and thus, it has been observed to overestimate the risk. Similarly, the rate of infection in an area has been noticed to underestimate the risk of…	Challenges in Tracking the Risk of COVID-19 in Bangladesh: Evaluation of A Novel Method	-1	unanswerable	unanswerable	2021
rma1vwkj	rma1vwkj	Background: The first case of COVID-19 was reported in Wuhan, China in December 2019. The disease has spread to 210 countries and has been labelled as a pandemic by the World Health Organization (WHO). Modelling, evaluating, and predicting the rate of disease transmission is crucial in understanding optimal methods for prevention and control. Our aim is to assess the impact of interstate and fore…	Modelling COVID-19 transmission in the United States through interstate and foreign travels and evaluating impact of governmental public health interventions	0	disease name: COVID-19 location: United States date: - R0 value: - %CI values: - method: disjoint mutually exclusive compartmental model, A system of nonlinear differential equations was formulated	[{"contribution":{"disease name": "COVID-19", "location": "United States", "date": "-", "R0 value": "-", "%CI values": "-", "method": "disjoint mutually exclusive compartmental model, A system of nonlinear differential equations was formulated"}}]	2020
dvqpwqiq	dvqpwqiq	BACKGROUND: The fungal cell wall constituent 1,3-ÃŽÂ²-d-glucan (BDG) is a pathogen-associated molecular pattern that can stimulate innate immunity. We hypothesized that BDG from colonizing fungi in critically ill patients may translocate into the systemic circulation and be associated with host inflammation and outcomes. METHODS: We enrolled 453 mechanically ventilated patients with acute respira…	Plasma 1,3-ÃŽÂ²-d-glucan levels predict adverse clinical outcomes in critical illness	-1	unanswerable	unanswerable	2021-07-22 10:00:00
698pwe4o	698pwe4o	Since the first case of coronavirus disease (COVID-19) in Wuhan Hubei, China, was reported in December 2019, COVID-19 has spread rapidly across the country and overseas. The first case in Anhui, a province of China, was reported on January 10, 2020. In the field of infectious diseases, modeling, evaluating and predicting the rate of disease transmission is very important for epidemic prevention a…	Modeling analysis of COVID-19 based on morbidity data in Anhui, China.	1	disease name: coronavirus disease (COVID-19) location: Anhui, China date: January 10 to February 11, 2020 R0 value: decreased from the initial 2.9764 to 0.8667 and then to 0.5725 %CI values: - method: SEI/QR model	[{"contribution":{"disease name": "coronavirus disease (COVID-19)", "location": "Anhui, China", "date": "January 10 to February 11, 2020", "R0 value": "decreased from the initial 2.9764 to 0.8667 and then to 0.5725", "%CI values": "-", "method": "SEI/QR model"}}]	2020-03-25
iawhu5ef	iawhu5ef	On March 10, 2020, Italy imposed a national lockdown to curtail the spread of COVID-19. Here we estimate that, fourteen days after the implementation of the strategy, the net reproduction number has dropped below the epidemic threshold - estimated range 0.4-0.7. Our findings provide a timeline of the effectiveness of the implemented lockdown, which is relevant for a large number of countries that…	The impact of a nation-wide lockdown on COVID-19 transmissibility in Italy	-1	unanswerable	unanswerable	2020-04-26 10:00:00
vhvdm82m	vhvdm82m	Introduction: SARS-CoV-2 primarily affects a person's respiratory system and leads to the spread of pathogenicity in the person and therefore this study evaluated the Case Fatality Rate (CFR) and Basic Reproductive Rate (R-naught) of COVID-19. Method: This cross-sectional descriptive study was performed on all people with COVID-19 from the first date of admission of positive PCR patients with SAR…	Evaluate the Case Fatality Rate (CFR) and Basic Reproductive Rate (R-naught) of COVID-19	1	disease name: COVID-19 location: Markazi Province in Khomein, Iran date: 20/2/2020 to 21/9/2020, (March) R0 value: 1.75 %CI values: - method: Cross-sectional descriptive study | disease name: COVID-19 location: Markazi Province in Khomein, Iran date: 20/2/2020 to 21/9/2020 (September) R0 value: 1.306 %CI values: - method: Cross-sectional descriptive study	[{"contribution":{"disease name": "COVID-19", "location": "Markazi Province in Khomein, Iran", "date": "20/2/2020 to 21/9/2020, (March)", "R0 value": "1.75", "%CI values": "-", "method": "Cross-sectional descriptive study"}},{"contribution":{"disease name": "COVID-19", "location": "Markazi Province in Khomein, Iran", "date": "20/2/2020 to 21/9/2020 (September)", "R0 value": "1.306", "%CI values":…	2021-06-30		1429
sdymtlha	sdymtlha	BACKGROUND: We describe the epidemiology of COVID-19 in South Africa following importation and during implementation of stringent lockdown measures. METHODS: Using national surveillance data including demographics, laboratory test data, clinical presentation, risk exposures (travel history, contacts and occupation) and outcomes of persons undergoing COVID-19 testing or hospitalised with COVID-19 …	The importation and establishment of community transmission of SARS-CoV-2 during the first eight weeks of the South African COVID-19 epidemic	-1	unanswerable	unanswerable	2021-08-12
eho8aoo4	eho8aoo4	OBJECTIVES: Despite an initial success, Israel's quarantine-isolation COVID-19 policy has abruptly collapsed. This study's aim is to identify the causes that led to this exponential rise in the accumulation of confirmed cases. METHODS: Epidemiological investigation reports were used to reconstruct chains of transmission as well as assess the net contribution of local infections relative to import…	A single holiday was the turning point of the COVID-19 policy of Israel	-1	unanswerable	unanswerable	2020
nzi9ioi2	nzi9ioi2	Importance: International Statistical Classification of Diseases and Related Health Problems, Tenth Revision (ICD-10) codes are used to characterize coronavirus disease 2019 (COVID-19)-related symptoms. Their accuracy is unknown, which could affect downstream analyses. Objective: To compare the performance of fever-, cough-, and dyspnea-specific ICD-10 codes with medical record review among patie…	Comparison of International Classification of Diseases and Related Health Problems, Tenth Revision Codes With Electronic Medical Records Among Patients With Symptoms of Coronavirus Disease 2019	-1	unanswerable	unanswerable	2020
e25puobn	e25puobn	BACKGROUND: In COVID-19 patients with acute respiratory distress syndrome (ARDS), the effectiveness of ventilatory rescue strategies remains uncertain, with controversial efficacy on systemic oxygenation and no data available regarding cerebral oxygenation and hemodynamics. METHODS: This is a prospective observational study conducted at San Martino Policlinico Hospital, Genoa, Italy. We included …	Early effects of ventilatory rescue therapies on systemic and cerebral oxygenation in mechanically ventilated COVID-19 patients with acute respiratory distress syndrome: a prospective observational study	-1	unanswerable	unanswerable	2021
fm7f8i3i	tlyak9tg	Objectives: To estimate the impact of various mitigation strategies on COVID-19 transmission in a U.S. jail beyond those offered in national guidelines. Methods: We developed a stochastic dynamic transmission model of COVID-19 in one large urban U.S. jail among staff and incarcerated individuals. We divided the outbreak into four intervention phases: the start of the outbreak, depopulation of the…	The effectiveness of interventions to reduce COVID-19 transmission in a large urban jail	1	disease name: COVID-19 location: U.S. jail date: first outbreak phase R0 value: 8.23 %CI values: 95% CrI: 5.01-12.90 method: next generation method | disease name: COVID-19 location: U.S. jail date: phase 2 R0 value: 3.58 %CI values: 95% CrI: 2.46-5.08 method: next generation method | disease name: COVID-19 location: U.S. jail date: phase 3 R0 value: 1.72 %CI values: 95% CrI: 1.41-2.12 method: ne…	[{"contribution":{"disease name": "COVID-19", "location": "U.S. jail", "date": "first outbreak phase", "R0 value": "8.23", "%CI values": "95% CrI: 5.01-12.90", "method": "next generation method"}},{"contribution":{"disease name": "COVID-19", "location": "U.S. jail", "date": "phase 2", "R0 value": "3.58", "%CI values": "95% CrI: 2.46-5.08", "method": "next generation method"}},{"contribution":{"di…	2020-06-18	change_main_cord_id	397
ojh5qu4n	ojh5qu4n	Most models of epidemic spread, including many designed specifically for COVID-19, implicitly assume that social networks are undirected, i.e., that the infection is equally likely to spread in either direction whenever a contact occurs. In particular, this assumption implies that the individuals most likely to spread the disease are also the most likely to receive it from others. Here, we review…	The role of directionality, heterogeneity and correlations in epidemic risk and spread	-1	unanswerable	unanswerable	2020
4cvv7yvn	4cvv7yvn	Although lung disease is the primary clinical outcome in COVID-19 patients, how SARS-CoV-2 induces lung pathology remains elusive. Here we describe a high-throughput platform to generate self-organizing, nearly identical, and genetically-matched human lung buds derived from hESCs cultured on micropatterned substrates. Synthetic lung buds resemble human fetal lungs and display proximo-distal patte…	Self-Organizing, Symmetry Breaking, Isogenic Human Lung Buds on Microchips Identify Alveolar Stem Cells as Novel Targets of SARS-CoV-2	-1	unanswerable	unanswerable	2021
k3utpaq9	k3utpaq9	BACKGROUND: Understanding the drivers of SARS-CoV-2 transmission is crucial for control policies but evidence of transmission rates in different settings remains limited. METHODS: We conducted a systematic review to estimate secondary attack rates (SAR) and observed reproduction numbers (Robs) in different settings exploring differences by age, symptom status, and duration of exposure. To account…	SARS-CoV-2 setting-specific transmission rates: a systematic review and meta-analysis	-1	unanswerable	unanswerable	2021
royctorf	royctorf	In the beginning of 2020, the COVID-19 epidemic broke out and spread all over the world in just a few months. COVID-19 spread analysis has attracted considerable research efforts in many areas including the impact of population mobility on the epidemic development. However, most studies do not use real data on population mobility, or choose an overly wide range of objects. This paper studies the …	Population Mobility Driven COVID-19 Analysis in Shenzhen	1	disease name: COVID-19 location: Shenzhen date: January 26 to February 16 R0 value: 2.61 %CI values: - method: Source-SEIR model	[{"contribution":{"disease name": "COVID-19", "location": "Shenzhen", "date": "January 26 to February 16", "R0 value": "2.61", "%CI values": "-", "method": "Source-SEIR model"}}]	2021
9sj9bgq2	9sj9bgq2	The transmission potential of a novel infection depends on both the inherent transmissibility of a pathogen, and the level of susceptibility in the host population. However, distinguishing between these pathogen- and population-specific properties typically requires detailed serological studies, which are rarely available in the early stages of an outbreak. Using a simple transmission model that …	Characterizing the Transmission Potential of Zoonotic Infections from Minor Outbreaks	0	disease name: monkeypox, influenza A(H5N1) and A(H7N9) location: - date: - R0 value: - %CI values: - method: simple transmission model that incorporates age-stratified social mixing patterns	[{"contribution":{"disease name": "monkeypox, influenza A(H5N1) and A(H7N9)", "location": "-", "date": "-", "R0 value": "-", "%CI values": "-", "method": "simple transmission model that incorporates age-stratified social mixing patterns"}}]	2015-04-10 10:00:00
27nwpjpw	27nwpjpw	We discuss the dynamics of new COVID-19 epidemic model by considering asymptomatic infections and the policies such as quarantine, protection (adherence to health protocols), and vaccination. The proposed model contains nine subpopulations: Susceptible (S), exposed (E), symptomatic infected (I), asymptomatic infected (A), recovered (R), death (D), protected (P), quarantined (Q), and vaccinated (V…	Dynamics of COVID-19 Epidemic Model with Asymptomatic Infection, Quarantine, Protection and Vaccination	-1	unanswerable	unanswerable	2021
7ln3g57q	7ln3g57q	Ascertaining the state of coronavirus outbreaks is crucial for public health decision-making. Absent repeated representative viral test samples in the population, public health officials and researchers alike have relied on lagging indicators of infection to make inferences about the direction of the outbreak and attendant policy decisions. Recently researchers have shown that SARS-CoV-2 RNA can …	Aligning SARS-CoV-2 indicators via an epidemic model: application to hospital admissions and RNA detection in sewage sludge	1	disease name: SARS-CoV-2 location: - date: - R0 value: 2.4 %CI values: ± 0.2 method: -	[{"contribution":{"disease name": "SARS-CoV-2", "location": "-", "date": "-", "R0 value": "2.4", "%CI values": "± 0.2", "method": "-"}}]	2020-10-28 05:00:00
z7a3g6e8	z7a3g6e8	Since the first identified individual of 2019 novel coronavirus (COVID-19) infection on Jan 20, 2020 in South Korea, the number of confirmed cases rapidly increased. As of Feb 26, 2020, 1,261 cases of COVID-19 including 12 deaths were confirmed in South Korea. Using the incidence data of COVID-19, we estimate the reproduction number at 1.5 (95% CI: 1.4-1.6), which indicates sustained transmission…	Transmission potential of COVID-19 in South Korea	1	disease name: COVID-19 location: South Korea date: - R0 value: 1.5 %CI values: (95% CI: 1.4-1.6) method: -	[{"contribution":{"disease name": "COVID-19", "location": "South Korea", "date": "-", "R0 value": "1.5", "%CI values": "(95% CI: 1.4-1.6)", "method": "-"}}]	2020-02-29 05:00:00
x0bnf7mp	x0bnf7mp	The occurrence of coronavirus disease 2019 (COVID-19) was followed by a small burst of cases around the world; afterward, due to a series of emergency non-pharmaceutical interventions (NPIs), the increasing number of confirmed cases slowed down in many countries. However, the subsequent gradual easing of governance led to a sudden increase in cases in late July 2020, arousing deep concern across …	Global COVID-19 pandemic waves: Limited lessons learned worldwide over the past year	-1	unanswerable	unanswerable	2021-09-14 10:00:00
d8ac6l6o	d8ac6l6o	In this paper, we present a mathematical model of an infectious disease according to the characteristics of the COVID-19 pandemic. The proposed enhanced model, which will be referred to as the SEIR (Susceptible-Exposed-Infectious-Recovered) model with population migration, is inspired by the role that asymptomatic infected individuals, as well as population movements can play a crucial role in sp…	The introduction of population migration to SEIAR for COVID-19 epidemic modelling with an efficient intervention strategy	0	disease name: COVID-19 location: - date: - R0 value: - %CI values: - method: SEIR (Susceptible-Exposed-Infectious-Recovered) model with population migration	[{"contribution":{"disease name": "COVID-19", "location": "-", "date": "-", "R0 value": "-", "%CI values": "-", "method": "SEIR (Susceptible-Exposed-Infectious-Recovered) model with population migration"}}]	2020-08-06 10:00:00
tmm0e4dm	tmm0e4dm	We describe an elemental logistic model for the propagation of CoV-2 in a community and illustrate the sensitivity of the model to key parameters such as R0, the initial rate of infections per infected person, and A0 , the fraction of infected people developing neutralizing antibodies. We demonstrate the importance of the duration of immunity in the population, the development of waves of new cas…	A logistic model of CoV-2 propagation	-1	unanswerable	unanswerable	2020-07-26 10:00:00
19zqt8cj	q7qdkqm2	Objective: To assess whether the basic reproduction number (R0) of COVID-19 is different across countries and what national-level demographic, social, and environmental factors characterize initial vulnerability to the virus. Methods: We fit logistic growth curves to reported daily case numbers, up to the first epidemic peak. This fitting estimates R0. We then use a generalized additive model to …	Social, economic, and environmental factors influencing the basic reproduction number of COVID-19 across countries	1	disease name: COVID-19 location: Across countries date: - R0 value: 1.70 (mean) %CI values: - method: fit logistic growth curves to reported daily case numbers, up to the first epidemic peak | disease name: COVID-19 location: Ghana date: - R0 value: 1.10 %CI values: - method: fit logistic growth curves to reported daily case numbers, up to the first epidemic peak | disease name: COVID-19 location…	[{"contribution":{"disease name": "COVID-19", "location": "Across countries", "date": "-", "R0 value": "1.70 (mean)", "%CI values": "-", "method": "fit logistic growth curves to reported daily case numbers, up to the first epidemic peak"}},{"contribution":{"disease name": "COVID-19", "location": "Ghana", "date": "-", "R0 value": "1.10", "%CI values": "-", "method": "fit logistic growth curves to …	2021-01-25 05:00:00	change_main_cord_id	1128
i9qt5uzu	i9qt5uzu	The SIR (Ã¢â‚¬Ëœsusceptible-infectious-recoveredÃ¢â‚¬â„¢) formulation is used to uncover the generic spread mechanisms observed by COVID-19 dynamics globally, especially in the early phases of infectious spread. During this early period, potential controls were not effectively put in place or enforced in many countries. Hence, the early phases of COVID-19 spread in countries where controls were w…	Global convergence of COVID-19 basic reproduction number and estimation from early-time SIR dynamics	1	disease name: COVID-19 location: Global date: - R0 value: 4.5 %CI values: - method: SIR formulation	[{"contribution":{"disease name": "COVID-19", "location": "Global", "date": "-", "R0 value": "4.5", "%CI values": "-", "method": "SIR formulation"}}]	2020-09-24 10:00:00
uxy1u33i	uxy1u33i	Background: In response to the COVID-19 pandemic, China implemented strict restrictions on cross-border travel to prevent disease importation. Yunnan, a Chinese province that borders dengue-endemic countries in Southeast Asia, experienced unprecedented reduction in dengue, from 6840 recorded cases in 2019 to 260 in 2020. Methods: Using a combination of epidemiological and virus genomic data, coll…	Assessing the impact of COVID-19 border restrictions on dengue transmission in Yunnan Province, China: an observational epidemiological and phylogenetic analysis	-1	unanswerable	unanswerable	2021-08-20 10:00:00
py5yhkw7	py5yhkw7	OBJECTIVE: To quantitatively evaluate the effectiveness of Fangcang shelter hospitals, designated hospitals, and the time interval from illness onset to diagnosis toward the prevention and control of the COVID-19 epidemic. METHODS: We used SEIAR and SEIA-CQFH warehouse models to simulate the two-period epidemic in Wuhan and calculate the time dependent basic reproduction numbers (BRNs) of symptom…	Quantitative assessment of the effectiveness of joint measures led by Fangcang shelter hospitals in response to COVID-19 epidemic in Wuhan, China	1	disease name: COVID-19 location: Wuhan, China date: on Jan 22, 2020 R0 value: 4.5 %CI values: - method: SEIAR and SEIA-CQFH warehouse models | disease name: COVID-19 location: Wuhan, China date: on March 18, 2020 R0 value: 0.18 %CI values: - method: SEIAR and SEIA-CQFH warehouse models	[{"contribution":{"disease name": "COVID-19", "location": "Wuhan, China", "date": "on Jan 22, 2020", "R0 value": "4.5", "%CI values": "-", "method": "SEIAR and SEIA-CQFH warehouse models"}},{"contribution":{"disease name": "COVID-19", "location": "Wuhan, China", "date": "on March 18, 2020", "R0 value": "0.18", "%CI values": "-", "method": "SEIAR and SEIA-CQFH warehouse models"}}]	2021-07-01		1498
0b0pxfi9	0b0pxfi9	Changes in human behaviour are a major determinant of epidemic dynamics. Collective activity can be modified through imposed control measures, but spontaneous changes can also arise as a result of uncoordinated individual responses to the perceived risk of contagion. Here, we introduce a stochastic epidemic model implementing population responses driven by individual time-varying risk aversion. T…	Individual risk-aversion responses tune epidemics to critical transmissibility (R = 1)	-1	unanswerable	unanswerable	2022
k63wzu3a	k63wzu3a	Coronavirus disease 2019 (COVID-19) is currently under a global pandemic trend. The efficiency of containment measures and epidemic tendency of typical countries should be assessed. In this study, the efficiency of prevention and control measures in China, Italy, Iran, South Korea, and Japan was assessed, and the COVID-19 epidemic tendency among these countries was compared. Results showed that t…	Linking key intervention timings to rapid declining effective reproduction number to quantify lessons against COVID-19	-1	unanswerable	unanswerable	2020-06-04 10:00:00
hwds5rja	hwds5rja	Background The emergence of a novel coronavirus (SARS-CoV-2) in Wuhan, China, at the end of 2019 has caused widespread transmission around the world. As new epicentres in Europe and America have arisen, of particular concern is the increased number of imported coronavirus disease 2019 (COVID-19) cases in Africa, where the impact of the pandemic could be more severe. We aim to estimate the number …	Importations of COVID-19 into African countries and risk of onward spread	-1	unanswerable	unanswerable	2020-05-24 10:00:00
bh2s99n6	bh2s99n6	The 2019 novel coronavirus disease (COVID-19) is running rampantly in China and is swiftly spreading to other countries in the world, which causes a great concern on the global public health. The absence of specific therapeutic treatment or effective vaccine against COVID-19 call for other avenues of the prevention and control measures. Media reporting is thought to be effective to curb the sprea…	Effects of media reporting on mitigating spread of COVID-19 in the early phase of the outbreak.	1	disease name: 2019 novel coronavirus disease (COVID-19) location: China date: - R0 value: 5.3167 %CI values: - method: deterministic dynamical model to examine the interaction of the disease progression and the media reports and to investigate the effectiveness of media reporting on mitigating the spread of COVID-19	[{"contribution":{"disease name": "2019 novel coronavirus disease (COVID-19)", "location": "China", "date": "-", "R0 value": "5.3167", "%CI values": "-", "method": "deterministic dynamical model to examine the interaction of the disease progression and the media reports and to investigate the effectiveness of media reporting on mitigating the spread of COVID-19"}}]	2020-03-10
7dm6egse	7dm6egse	INTRODUCTION: An effective response to the COVID-19 pandemic has been the decision to subject individuals residing in New York City to quarantine rules in order to reduce the spread of the virus. As might have been expected, restriction of usual daily activities would affect individualsÃ¢â‚¬â„¢ sleep-wake patterns. It is also known that exposure to traumatic experiences can also engender sleep di…	685 Sleep Latency, Pre and Peri-COVID-19 Experiences and PTSD Symptoms: Results from the NYU COVID-19 Mental Health Study	-1	unanswerable	unanswerable	2021-05-03 10:00:00
y6vqq77t	y6vqq77t	BACKGROUND: Given the rising rates of obesity there is a pressing need for medical schools to better prepare students for intervening with patients who have overweight or obesity and for prevention efforts. OBJECTIVE: To assess the effect of a multi-modal weight management curriculum on counseling skills for health behavior change. DESIGN: A pair-matched, group-randomized controlled trial (2015-2…	Teaching Medical Students to Help Patients Manage Their Weight: Outcomes of an Eight-School Randomized Controlled Trial	-1	unanswerable	unanswerable	2021-04-09 10:00:00
toude4rl	toude4rl	Estimating key aspects of transmission is crucial in infectious disease control. Serial intervals - the time between symptom onset in an infector and infectee - are fundamental, and help to define rates of transmission, estimates of reproductive numbers, and vaccination levels needed to prevent transmission. However, estimating the serial interval requires knowledge of individuals' contacts and e…	Genomic epidemiology offers high resolution estimates of serial intervals for COVID-19	-1	unanswerable	unanswerable	2022-03-03 05:00:00
lf80v3vr	lf80v3vr	Hand-foot-and-mouth disease (HFMD) is a common childhood disease with substantial disease burden in Asia. Mixed results were reported on the associations between HFMD incidence and meteorological factors or school holidays, while limited studies focused on their association on transmissibility. We aimed to measure the transmissibility of HFMD and to examine its potential driving factors in Hong K…	Transmission of Hand, Foot and Mouth Disease and Its Potential Driving Factors in Hong Kong	-1	unanswerable	unanswerable	2016-06-07
0i0t1p8x	0i0t1p8x	Background: Unprecedented public health interventions including travel restrictions and national lockdowns have been implemented to stem the COVID-19 epidemic, but the effectiveness of non-pharmaceutical interventions is still debated. International comparisons are hampered by highly variable conditions under which epidemics spread and differences in the timing and scale of interventions. Cumulat…	COVID-19 epidemic severity is associated with timing of non-pharmaceutical interventions	-1	unanswerable	unanswerable	2020-09-18 10:00:00
