# Supplementary material
Source: ML conference proceedings conference paper supplement (https://aclanthology.org/2024.findings-eacl.26)
Supplement: note [file test.xlsx]

## Sheet: Sheet1
main_cord_uid	cord_uid	abstract	title	annotator_investigating_R0	text_response	json_response	publish_time	action	cluster_id
85chebix	85chebix	Background: COVID-19 has emerged and spread at great speed globally and has presented one of the greatest public health challenges in modern times with no proven cure or vac-cine. Africa is still early in this epidemic, therefore the spectrum of disease severity is not yet clear. Methods: We used a mathematical model to fit to the observed cases of COVID-19 in South Africa to estimate the basic r…	Quantifying early COVID-19 outbreak transmission in South Africa and exploring vaccine efficacy scenarios	1	disease name: COVID-19 location: South Africa date: - R0 value: 2.95 %CI values: (95% credible interval [CrI] 2.83-3.33) method: mathematical model	[{"contribution":{"disease name": "COVID-19", "location": "South Africa", "date": "-", "R0 value": "2.95", "%CI values": "(95% credible interval [CrI] 2.83-3.33)", "method": "mathematical model"}}]	2020-04-29 10:00:00
4r9vb7ub	4r9vb7ub	Background COVID-19 continues to impose significant morbidity and mortality in Japan even after implementing the vaccination program. It would remain elusive if restrictions for its mitigation were to be lifted or relaxed in the future. Methods A simulation study that explored possible vaccination coverage scenarios and changes in the intensity of nonpharmaceutical intervention restrictions was p…	Simulation of future COVID-19 epidemic by vaccination coverage scenarios in Japan	-1	unanswerable	unanswerable	2021
l60snfap	l60snfap	Between April 2012 and June 2014, 820 laboratory-confirmed cases of the Middle East respiratory syndrome coronavirus (MERS-CoV) have been reported in the Arabian Peninsula, Europe, North Africa, Southeast Asia, the Middle East, and the United States. The observed epidemiology is different to SARS, which showed a classic epidemic curve and was over in eight months. The much longer persistence of M…	A Scenario-Based Evaluation of the Middle East Respiratory Syndrome Coronavirus and the Hajj	-1	unanswerable	unanswerable	2014-01-01
b2yalnrx	b2yalnrx	This paper presents a simple mathematical model that answers how much testing and tracing we need to do to suppress new surges of COVID-19 infections after reopening. We derived the model by modifying the SEIR model taking into the effects of testing and tracing. The following equation is one of the essential outcomes of the model: {rho}>(R0S/N-1)/(D(1+{eta}R0)) Where {rho} is the percentage of i…	A Model for the Testing and Tracing Needed to Suppress COVID-19	-1	unanswerable	unanswerable	2020-06-05 10:00:00
mnrxtd7j	mnrxtd7j	The spread of epidemics has been extensively investigated using susceptible-exposed infectious-recovered-susceptible (SEIRS) models. In this work, we propose a SEIRS pandemic model with infection forces and intervention strategies. The proposed model is characterized by a stochastic differential equation (SDE) framework with arbitrary parameter settings. Based on a Markov semigroup hypothesis, we…	A Stochastic SEIRS Epidemic Model with Infection Forces and Intervention Strategies	-1	unanswerable	unanswerable	2022-01-10
edwtagu1	edwtagu1	COVID-19 has globally spread to over 4 million people and the epidemic situation in Japan is very serious. The purpose of this research was to assess the risk of COVID-19 epidemic dissemination in Japan by estimating the current state of epidemic dissemination and providing some epidemic prevention and control recommendations. Firstly, the period from 6 January to 31 March 2020 was divided into f…	Forecast Possible Risk for COVID-19 Epidemic Dissemination Under Current Control Strategies in Japan	1	disease name: COVID-19 location: Japan date: 6 January to 31 March 2020 R0 value: 1.954 %CI values: 95% confidence interval (CI) 1.851-2.025 method: estimating the current state of epidemic dissemination	[{"contribution":{"disease name": "COVID-19", "location": "Japan", "date": "6 January to 31 March 2020", "R0 value": "1.954", "%CI values": "95% confidence interval (CI) 1.851-2.025", "method": "estimating the current state of epidemic dissemination"}}]	2020
ssrainqk	ssrainqk	The first case of coronavirus disease 2019 (COVID-19) in Algeria was reported on 25 February 2020. Since then, it has progressed rapidly and the number of cases grow exponentially each day. In this article, we utilize SEIR modelling to forecast COVID-19 outbreak in Algeria under two scenarios by using the real-time data from March 01 to April 10, 2020. In the first scenario: no control measures a…	Prediction of confinement effects on the number of Covid-19 outbreak in Algeria	1	disease name: Covid-19 location: Algeria date: March 01 to April 10, 2020 R0 value: 2.1 %CI values: - method: SEIR modelling	[{"contribution":{"disease name": "Covid-19", "location": "Algeria", "date": "March 01 to April 10, 2020", "R0 value": "2.1", "%CI values": "-", "method": "SEIR modelling"}}]	2020
j8019gin	j8019gin	As the SARS-CoV-2 pandemic continues its rapid global spread, quantification of local transmission patterns has been, and will continue to be, critical for guiding pandemic response. Understanding the accuracy and limitations of statistical methods to estimate the reproduction number, R0, in the context of emerging epidemics is therefore vital to ensure appropriate interpretation of results and t…	A comparative analysis of statistical methods to estimate the reproduction number in emerging epidemics with implications for the current COVID-19 pandemic	-1	unanswerable	unanswerable	2020-05-16 10:00:00
vd8zhp77	vd8zhp77	BACKGROUND: Undifferentiated carcinoma with osteoclast-like giant cells (UCOGCs) is a rare subtype of pancreatic cancer (PC), and its clinicopathological characteristics are still unclear. Herein, we report a case of initially unresectable UCOGC that was successfully resected after FOLFIRINOX therapy. CASE PRESENTATION: A 63-year-old man was referred to us for evaluation of a pancreatic mass dete…	Conversion surgery for undifferentiated carcinoma with osteoclast-like giant cells of the pancreas: a case report	-1	unanswerable	unanswerable	2022
cm4hhfvk	cm4hhfvk	COVID-19 is reported to have been brought under control in China. To understand the COVID-19 outbreak in China and provide potential lessons for other parts of the world, in this study we apply a mathematical model with multiple datasets to estimate the transmissibility of the SARS-CoV-2 virus and the severity of the illness associated with the infection, and how both were affected by unprecedent…	Transmission dynamics and control measures of COVID-19 outbreak in China: a modelling study	1	disease name: COVID-19 location: China date: before 8th February 2020 R0 value: 2.33 %CI values: 95% CI 1.96-3.69 method: Mathematical Model with Multiple Datasets	[{"contribution":{"disease name": "COVID-19", "location": "China", "date": "before 8th February 2020", "R0 value": "2.33", "%CI values": "95% CI 1.96-3.69", "method": "Mathematical Model with Multiple Datasets"}}]	2021
zq1pvawa	zq1pvawa	In this paper, a SIRD model is adapted to study the vaccine's impact on the spread of coronavirus (COVID19) spread in Lebanon. To describe the epidemic development across the country, a Kalman filter is integrated with the SIRD model in order to estimate the time-varying reproduction number R-t - is the most important indicator that predicts the severity of an epidemic outbreak. R-t denotes the n…	Tracking R-t of COVID-19 Vaccine Effectiveness Using Kalman Filter and SIRD Model	-1	unanswerable	unanswerable	2021
abpp98cz	abpp98cz	Covid-19 poses significant risk of nosocomial transmission, and preventing this requires good estimates of the basic reproduction number R0 in hospitals and care facilities, but these are currently lacking. Such estimates are challenging due to small population sizes in these facilities and inconsistent testing practices. We estimate the patient-to-patient R0 and daily transmission rate of SARS-C…	How well does SARS-CoV-2 spread in hospitals?	1	disease name: SARS-CoV-2 location: a closely monitored hospital outbreak in Paris, entire hospital date: 2020 during the first wave R0 value: 2.6 %CI values: - method: realistic epidemic model | disease name: SARS-CoV-2 location: a closely monitored hospital outbreak in Paris, individual wards date: 2020 during the first wave R0 value: from 3 to 15 %CI values: - method: realistic epidemic model |…	[{"contribution":{"disease name": "SARS-CoV-2", "location": "a closely monitored hospital outbreak in Paris, entire hospital", "date": "2020 during the first wave", "R0 value": "2.6", "%CI values": "-", "method": "realistic epidemic model"}},{"contribution":{"disease name": "SARS-CoV-2", "location": "a closely monitored hospital outbreak in Paris, individual wards", "date": "2020 during the first…	2021		425
oywlt4wz	oywlt4wz	A new modification of the SIR epidemic model incorporating vaccination is proposed in the present paper. The recent trend of vaccinating against COVID-19 pandemic reveals a strong control of infectious disease. On the other hand, it is observed in some countries that, the vaccine application offers less control over the spread of virus, since some portion of vaccinated people is not totally prote…	An extended epidemic model with vaccination: Weak-immune SIRVI	-1	unanswerable	unanswerable	2022-04-22 10:00:00
90ftzrif	90ftzrif	BACKGROUND: Imported COVID-19 cases, if unchecked, can jeopardize the effort of domestic containment. We aim to find out what sustainable border control options for different entities (e.g., countries, states) exist during the reopening phases, given their own choice of domestic control measures. METHODS: We propose a SUIHR model, which has built-in imported risk and (1-tier) contact tracing to s…	Sustainable border control policy in the COVID-19 pandemic: A math modeling study	-1	unanswerable	unanswerable	2021
xdjgjeb9	xdjgjeb9	The number of COVID-19 cases is continuously increasing in different countries (as of March 2020) including the Philippines. It is estimated that the basic reproductive number of COVID-19 is around 1.5 to 4. The basic reproductive number characterizes the average number of persons that a primary case can directly infect in a population full of susceptible individuals. However, there can be supers…	A mathematical model of COVID-19 transmission between frontliners and the general public	-1	unanswerable	unanswerable	2020-03-30 10:00:00
htd6ocsc	htd6ocsc	Mathematical model for the transition dynamics and control of the novel coronavirus (COVID-19) in Nigeria has been proposed for incorporating the impact of vaccination and prevention. The endemic equilibrium state and the effective reproductive number (R(0)) was obtained and used to find the best recipe for curbing the rate of transmission of the disease. Using the Nigerian demographic data, nume…	Mathematical recipe for curbing coronavirus (COVID-19) transmition dynamics	0	disease name: COVID-19 location: Nigeria date: - R0 value: - %CI values: - method: Mathematical model	[{"contribution":{"disease name": "COVID-19", "location": "Nigeria", "date": "-", "R0 value": "-", "%CI values": "-", "method": "Mathematical model"}}]	2021-05-21 10:00:00
lfe5vaz1	lfe5vaz1	BACKGROUND: Emergence of the coronavirus disease (COVID-19) caught the world off guard and unprepared, initiating a global pandemic. In the absence of evidence, individual communities had to take timely action to reduce the rate of disease spread and avoid overburdening their health care systems. Although a few predictive models have been published to guide these decisions, most have not taken in…	Modeling COVID-19 Latent Prevalence to Assess a Public Health Intervention at a State and Regional Scale: Retrospective Cohort Study	0	disease name: COVID-19 location: North Carolina and the Charlotte Metropolitan Region date: - R0 value: - %CI values: - method: susceptible-infected-removed (SIR) model	[{"contribution":{"disease name": "COVID-19", "location": "North Carolina and the Charlotte Metropolitan Region", "date": "-", "R0 value": "-", "%CI values": "-", "method": "susceptible-infected-removed (SIR) model"}}]	2020
ikqz23pe	ikqz23pe	The basic reproductive number, R(0), is one of the most common and most commonly misapplied numbers in public health. Often used to compare outbreaks and forecast pandemic risk, this single number belies the complexity that different epidemics can exhibit, even when they have the same R(0). Here, we reformulate and extend a classic result from random network theory to forecast the size of an epid…	Beyond R(0): heterogeneity in secondary infections and probabilistic epidemic forecasting	-1	unanswerable	unanswerable	2020-11-04 05:00:00
mip0v988	ch7nna59	As countries in the world review interventions for containing the COVID-19 pandemic, important lessons can be drawn by studying the full transmission dynamics of SARS-CoV-2 in Wuhan, China, where vigorous non-pharmaceutical interventions have suppressed the local COVID-19 outbreak1. Here, we use a modelling approach to reconstruct the full-spectrum dynamics of COVID-19 between January 1, 2020 and…	Reconstruction of the full transmission dynamics of COVID-19 in Wuhan.	1	disease name: COVID-19 location: Wuhan, China date: January 1, 2020 and March 8, 2020 R0 value: 3.54 %CI values: 95% credible interval [CrI]: 3.40-3.67 method: modelling approach to reconstruct the full-spectrum dynamics of COVID-19 | disease name: COVID-19 location: Wuhan, China date: as of March 8 R0 value: 0.28 %CI values: (0.23-0.33) method: modelling approach to reconstruct the full-spectrum…	[{"contribution":{"disease name": "COVID-19", "location": "Wuhan, China", "date": "January 1, 2020 and March 8, 2020", "R0 value": "3.54", "%CI values": "95% credible interval [CrI]: 3.40-3.67", "method": "modelling approach to reconstruct the full-spectrum dynamics of COVID-19"}},{"contribution":{"disease name": "COVID-19", "location": "Wuhan, China", "date": "as of March 8", "R0 value": "0.28",…	2020-07-16	change_main_cord_id	238
ix4w2jcf	ix4w2jcf	Social distancing measures have been imposed across the US in order to stem the spread of COVID-19. We quantify the reduction in doubling rate, by state, that is associated with this intervention. Using the earlier of K-12 school closures and restaurant closures, by state, to define the start of the intervention, and considering daily confirmed cases through April 23rd, 2020, we find that social …	Social distancing merely stabilized COVID-19 in the US	-1	unanswerable	unanswerable	2020
nz9dy3xr	nz9dy3xr	The present paper focuses on the modeling of the COVID-19 infection with the use of hospitalization, isolation and quarantine. Initially, we construct the model by spliting the entire population into different groups. We then rigorously analyze the model by presenting the necessary basic mathematical features including the feasible region and positivity of the problem solution. Further, we evalua…	Mathematical modeling and stability analysis of the COVID-19 with quarantine and isolation	-1	unanswerable	unanswerable	2022-02-08 05:00:00
iibgsr5l	iibgsr5l	Currently the COVID-19 epidemic is developing in the City of Culiac\'n Sinaloa, Mexico, where up to April 20 of this year there have been 35 deaths associated with this epidemic. The reproduction number $(R_0)$ of an epidemic represents the average number of people infected by an infected person during their period of infection. In this work we use the data published by the Secretary of Health of…	Estimaci\'on del n\'umero de reproducci\'on de la epidemia COVID-19 en Culiac\'an Sinaloa, M\'exico	1	disease name: COVID-19 location: Culiacán Sinaloa, Mexico date: - R0 value: 1.562 %CI values: (1.401,1.742) method: -	[{"contribution":{"disease name": "COVID-19", "location": "Culiacán Sinaloa, Mexico", "date": "-", "R0 value": "1.562", "%CI values": "(1.401,1.742)", "method": "-"}}]	2020-04-21 10:00:00
yusr53hp	yusr53hp	The reproductive number is an important metric that has been widely used to quantify the infectiousness of communicable diseases. The time-varying instantaneous reproductive number is useful for monitoring the real time dynamics of a disease to inform policy making for disease control. Local estimation of this metric, for instance at a county or city level, allows for more targeted interventions …	Estimation of heterogeneous instantaneous reproduction numbers with application to characterize SARS-CoV-2 transmission in Massachusetts counties	-1	unanswerable	unanswerable	2021-12-05 05:00:00		411
nkyhcs0c	nkyhcs0c	Background: Pregnant women are at increased risk for severe outcomes from coronavirus disease 2019 (COVID-19), but the pathophysiology underlying this increased morbidity and its potential effect on the developing fetus is not well understood. Methods: We assessed placental histology, ACE2 expression, and viral and immune dynamics at the term placenta in pregnant women with and without respirator…	Maternal respiratory SARS-CoV-2 infection in pregnancy is associated with a robust inflammatory response at the maternal-fetal interface	-1	unanswerable	unanswerable	2021
bp1ynsq0	bp1ynsq0	BACKGROUND: Mathematical models can provide insights on the spread of infectious diseases, such as the novel SARS-CoV-2 (COVID-19). This work applied a SEIR epidemiological compartmental model (susceptible-exposed-infected-recovered) with k phases to predict the actual spread of the COVID-19 virus. Fig. 1 Ã¢â‚¬â€œ SEIR model for COVID-19. [Image: see text] METHODS: Four parameters of the SEIR mod…	433. Mathematical Modeling of COVID-19 Transmission by a k Phases SEIR Model	1	disease name: novel SARS-CoV-2 (COVID-19) location: USA date: - R0 value: R0_1=1.0; R0_2=17.4; R0_3=1.0 %CI values: - method: SEIR epidemiological compartmental model (susceptible-exposed-infected-recovered) with k phases | disease name: novel SARS-CoV-2 (COVID-19) location: Brazil date: - R0 value: R0_1=8.0; R0_2=1.3 %CI values: - method: SEIR epidemiological compartmental model (susceptible-exp…	[{"contribution":{"disease name": "novel SARS-CoV-2 (COVID-19)", "location": "USA", "date": "-", "R0 value": "R0_1=1.0; R0_2=17.4; R0_3=1.0", "%CI values": "-", "method": "SEIR epidemiological compartmental model (susceptible-exposed-infected-recovered) with k phases"}},{"contribution":{"disease name": "novel SARS-CoV-2 (COVID-19)", "location": "Brazil", "date": "-", "R0 value": "R0_1=8.0; R0_2=1…	2020-12-31		1349
ryraplpe	ryraplpe	Background: Most of the countries are affected with the pandemic outbreak of the coronavirus infection. Understanding the severity and distribution in various regions will help in planning the controlling measures. Objectives: The objective was to assess the distribution and growth rate of COVID-19 infection in Tamil Nadu, India. Methods: The data on the number of infections of COVID-19 have been…	Distribution and growth rate of COVID-19 outbreak in Tamil Nadu: A log-linear regression approach	1	disease name: COVID-19 location: Tamil Nadu, India date: first 41 days of the outbreak started on March 7, 2020 R0 value: 1.88 (min = 1.09, max = 2.51) and 0.76 (min = 0.56, max = 0.99) in the growth and decay phases %CI values: - method: log-linear regression approach	[{"contribution":{"disease name": "COVID-19", "location": "Tamil Nadu, India", "date": "first 41 days of the outbreak started on March 7, 2020", "R0 value": "1.88 (min = 1.09, max = 2.51) and 0.76 (min = 0.56, max = 0.99) in the growth and decay phases", "%CI values": "-", "method": "log-linear regression approach"}}]	2020
kwnteqg1	kwnteqg1	BACKGROUND: Estimates of parameters for disease transmission in large-scale infectious disease outbreaks are often obtained to represent large groups of people, providing an average over a potentially very diverse area. For control measures to be more effective, a measure of the heterogeneity of the parameters is desirable. METHODS: We propose a novel extension of a network-based approach to esti…	Estimating the reproductive number in the presence of spatial heterogeneity of transmission patterns	1	disease name: Influenza location: South Africa date: - R0 value: 1.33 (1.31, 1.36) %CI values: - method: novel extension of a network-based approach, South Africa as a single entity with homogeneous transmission characteristics | disease name: Influenza location: South Africa date: - R0 value: (1.23-1.37) %CI values: - method: novel extension of a network-based approach, fitting a new model for e…	[{"contribution":{"disease name": "Influenza", "location": "South Africa", "date": "-", "R0 value": "1.33 (1.31, 1.36)", "%CI values": "-", "method": "novel extension of a network-based approach, South Africa as a single entity with homogeneous transmission characteristics"}},{"contribution":{"disease name": "Influenza", "location": "South Africa", "date": "-", "R0 value": "(1.23-1.37)", "%CI val…	2013-07-26 10:00:00		1180
xplon6eh	xplon6eh	In this study, we formulate a mathematical model incorporating age specific transmission dynamics of COVID-19 to evaluate the role of vaccination and treatment strategies in reducing the size of COVID-19 burden. Initially, we establish the positivity and boundedness of the solutions of the model and calculate the basic reproduction number. We then formulate an optimal control problem with vaccina…	Optimal Vaccination and Treatment Strategies in Reduction of COVID-19 Burden	-1	unanswerable	unanswerable	2021
8bf5te4l	8bf5te4l	The ongoing SARS-CoV-2 pandemic is one of the biggest outbreaks after the Spanish flu of 1918. Understanding the epidemiology of viral outbreaks is the first step towards vaccine development programs. This is the first phylodynamics study attempted on of SARS-CoV-2 genomes from India to infer its current evolution in the context of an ongoing pandemic. Out of 286 retrieved SARS-CoV-2 whole genome…	Phylogenomics and phylodynamics of SARS-CoV-2 retrieved genomes from India	-1	unanswerable	unanswerable	2020-06-26
ax9x6q6c	ax9x6q6c	Public health interventions have been implemented to contain the outbreak of COVID-19 in New York City. However, the assessment of those interventions, e.g. social distancing, cloth face covering based on the real-world data from filed study is lacking. The SEIR compartmental model was used to evaluate the social distancing and cloth face covering effect on the daily culminative laboratory confir…	Do Stay at Home Orders and Cloth Face Coverings Control COVID-19 in New York City? Results from a SIER Model Based on Real World Data	1	disease name: COVID-19 location: New York City date: - R0 value: 4.60 in Phase 1 without any intervention %CI values: - method: SEIR compartmental model	[{"contribution":{"disease name": "COVID-19", "location": "New York City", "date": "-", "R0 value": "4.60 in Phase 1 without any intervention", "%CI values": "-", "method": "SEIR compartmental model"}}]	2020-09-24
36fbcobw	36fbcobw	Objectives: To estimate the basic reproduction number (R0) of COVID-19 in the early stage of the epidemic and predict the expected number of new cases in Shahroud, Northeast of Iran. Methods: The R0 of COVID-19 was estimated using the serial interval distribution and the number of incidence cases. The serial interval was fit with a gamma distribution. The probable incidence and cumulative inciden…	The basic reproduction number and prediction of the epidemic size of the novel coronavirus (COVID-19) in Shahroud, Iran	1	disease name: COVID-19 location: Shahroud, Northeast of Iran date: early 14 days R0 value: 2.7 %CI values: 95% confidence interval (CI): 2.1 to 3.4 method: the serial interval distribution and the number of incidence cases | disease name: COVID-19 location: Shahroud, Northeast of Iran date: by the end of the day 41 R0 value: 1.13 %CI values: 95% CI: 1.03 to 1.25 method: the serial interval distri…	[{"contribution":{"disease name": "COVID-19", "location": "Shahroud, Northeast of Iran", "date": "early 14 days", "R0 value": "2.7", "%CI values": "95% confidence interval (CI): 2.1 to 3.4", "method": "the serial interval distribution and the number of incidence cases"}},{"contribution":{"disease name": "COVID-19", "location": "Shahroud, Northeast of Iran", "date": "by the end of the day 41", "R0…	2020-04-08		165
r87zpmkf	r87zpmkf	The current emergence of coronavirus (SARS-CoV-2) puts the world in threat. The structural research on the receptor recognition by SARS-CoV-2 has identified the key interactions between SARS-CoV-2 spike protein and its host (epithelial cell) receptor, also known as angiotensin-converting enzyme 2 (ACE2). It controls both the cross-species and human-to-human transmissions of SARS-CoV-2. In view of…	A Model for SARS-CoV-2 Infection with Treatment	-1	unanswerable	unanswerable	2020
zanh629x	zanh629x	BACKGROUND The transmission potential of primary pneumonic plague, caused by Yersinia pestis, is one of the key epidemiological determinants of a potential biological weapon, and requires clarification and time dependent interpretation. METHOD This study estimated the reproduction number and its time dependent change through investigations of outbreaks in Mukden, China (1946), and Madagascar (195…	Transmission potential of primary pneumonic plague: time inhomogeneous evaluation based on historical documents of the transmission network.	1	disease name: primary pneumonic plague location: Mukden, China date: 1946 R0 value: 2.8 to 3.5 %CI values: The lower 95% confidence intervals of R(0) exceeded unity method: statistical estimation of R(0) based on similar information | disease name: primary pneumonic plague location: Madagascar date: 1957 R0 value: 2.8 to 3.5 %CI values: The lower 95% confidence intervals of R(0) exceeded unity me…	[{"contribution":{"disease name": "primary pneumonic plague", "location": "Mukden, China", "date": "1946", "R0 value": "2.8 to 3.5", "%CI values": "The lower 95% confidence intervals of R(0) exceeded unity", "method": "statistical estimation of R(0) based on similar information"}},{"contribution":{"disease name": "primary pneumonic plague", "location": "Madagascar", "date": "1957", "R0 value": "2…	2006		1245
wgwjwxjb	wgwjwxjb	In this work, a new compartmental mathematical model of COVID-19 pandemic has been proposed incorporating imperfect quarantine and disrespectful behavior of citizens towards lockdown policies, which are evident in most of the developing countries. An integer derivative model has been proposed initially and then the formula for calculating basic reproductive number, R 0 of the model has been prese…	Forecasting of COVID-19 pandemic: From integer derivatives to fractional derivatives	1	disease name: COVID-19 location: Cameroon date: - R0 value: 3.41 %CI values: ( 95 % CI : 2.2 - 4.4 ) method: compartmental mathematical model	[{"contribution":{"disease name": "COVID-19", "location": "Cameroon", "date": "-", "R0 value": "3.41", "%CI values": "( 95 % CI : 2.2 - 4.4 )", "method": "compartmental mathematical model"}}]	2020
qnuec68y	qnuec68y	We develop an epidemic model to explain and predict the dynamics of the SARS-CoV-2 virus and to assess the economic costs of lockdown scenarios. The standard epidemic three-variable model, SIR (Susceptible, Infected and Removed) is extended into a five-variable model SCARE: Susceptible, Carrier, Affected (i.e. sick), Recovered and Eliminated (i.e. dead). Using WHO and Oxford data on cases and dea…	Scare: When Economics Meets Epidemiology with COVID-19	0	disease name: COVID-19 location: Belgium date: - R0 value: - %CI values: - method: standard epidemic three-variable model, SIR (Susceptible, Infected and Removed) is extended into a five-variable model SCARE: Susceptible, Carrier, Affected (i.e. sick), Recovered and Eliminated (i.e. dead)	[{"contribution":{"disease name": "COVID-19", "location": "Belgium", "date": "-", "R0 value": "-", "%CI values": "-", "method": "standard epidemic three-variable model, SIR (Susceptible, Infected and Removed) is extended into a five-variable model SCARE: Susceptible, Carrier, Affected (i.e. sick), Recovered and Eliminated (i.e. dead)"}}]	2020
r48t4g3k	r48t4g3k	The dynamics of immunity are crucial to understanding the long-term patterns of the SARS-CoV-2 pandemic. Several cases of reinfection with SARS-CoV-2 have been documented 48-142 days after the initial infection and immunity to seasonal circulating coronaviruses is estimated to be shorter than 1 year. Using an age-structured, deterministic model, we explore potential immunity dynamics using contac…	Dynamics of SARS-CoV-2 with waning immunity in the UK population	-1	unanswerable	unanswerable	2021
e5ufj3yt	e5ufj3yt	To investigate the early epidemic of COVID-19, a total of 176 confirmed COVID-19 cases in Shiyan city, Hubei province, China were surveyed. Our data indicated that the rate of emergence of early confirmed COVID-19 cases in Hubei province outside Wuhan was dependent on migration population, and the second-generation of patients were family clusters originating from Wuhan travelers. Epidemiological…	Epidemiological and Clinical Characteristics of Patients With Coronavirus Disease-2019 in Shiyan City, China	1	disease name: Coronavirus Disease-2019 location: Shiyan City, Hubei Province, China date: - R0 value: 1.81 %CI values: - method: Epidemiological investigation	[{"contribution":{"disease name": "Coronavirus Disease-2019", "location": "Shiyan City, Hubei Province, China", "date": "-", "R0 value": "1.81", "%CI values": "-", "method": "Epidemiological investigation"}}]	2020
hm3lr16i	hm3lr16i	BACKGROUND: Face masks have become commonplace across the USA because of the severe acute respiratory syndrome coronavirus 2 (SARS-CoV-2) epidemic. Although evidence suggests that masks help to curb the spread of the disease, there is little empirical research at the population level. We investigate the association between self-reported mask-wearing, physical distancing, and SARS-CoV-2 transmissi…	Mask-wearing and control of SARS-CoV-2 transmission in the USA: a cross-sectional study	-1	unanswerable	unanswerable	2021
mtthwhbm	mtthwhbm	BACKGROUND: Restricting human mobility is an effective strategy used to control disease spread. However, whether mobility restriction is a proportional response to control the ongoing COVID-19 pandemic is unclear. We aimed to develop a model that can quantify the potential effects of various intracity mobility restrictions on the spread of COVID-19. METHODS: In this modelling study, we used anony…	Effects of human mobility restrictions on the spread of COVID-19 in Shenzhen, China: a modelling study using mobile phone data	-1	unanswerable	unanswerable	2020-07-27 10:00:00
t4kkydnm	t4kkydnm	In managing COVID-19 with non-pharmaceutical interventions, occupancy of intensive care units (ICU) is often used as an indicator to inform when to intensify mitigation and thus reduce SARS-CoV-2 transmission, strain on ICUs, and deaths. However, ICU occupancy thresholds at which action should be taken are often selected arbitrarily. We propose a quantitative approach using mathematical modeling …	Modeling robust COVID-19 intensive care unit occupancy thresholds for imposing mitigation to prevent exceeding capacities	-1	unanswerable	unanswerable	2021
w94v2ozp	w94v2ozp	With the aim of studying the spread of the SARS-CoV-2 infection in the Tuscany region of Italy during the first epidemic wave (February-June 2020), we define a compartmental model that accounts for both detected and undetected infections and assumes that only notified cases can die. We estimate the infection fatality rate, the case fatality rate, and the basic reproduction number, modeled as a ti…	The first wave of the SARS-CoV-2 epidemic in Tuscany (Italy): A SI2R2D compartmental model with uncertainty evaluation	1	disease name: SARS-CoV-2 location: Tuscany , Italy date: (February-June 2020) R0 value: 6.055 %CI values: - method: compartmental model	[{"contribution":{"disease name": "SARS-CoV-2", "location": "Tuscany , Italy", "date": "(February-June 2020)", "R0 value": "6.055", "%CI values": "-", "method": "compartmental model"}}]	2021
rl6yum7n	rl6yum7n	Severe acute respiratory syndrome (SARS) has been the first severe contagious disease to emerge in the 21st century. The available epidemic curves for SARS show marked differences between the affected regions with respect to the total number of cases and epidemic duration, even for those regions in which outbreaks started almost simultaneously and similar control measures were implemented at the …	Different Epidemic Curves for Severe Acute Respiratory Syndrome Reveal Similar Impacts of Control Measures	-1	unanswerable	unanswerable	2004-09-15 10:00:00
jznzhmlp	jznzhmlp	BACKGROUND: Malaria antigen-specific antibodies and polymorphisms in host receptors involved in antibody functionality have been associated with different outcomes of Plasmodium falciparum infections. Thus, to identify key prospective malaria antigens for vaccine development, there is the need to evaluate the associations between malaria antibodies and antibody dependent host factors with more ri…	Evaluating the predictive performance of malaria antibodies and FCGR3B gene polymorphisms on Plasmodium falciparum infection outcome: a prospective cohort study	-1	unanswerable	unanswerable	2020-08-27
nf6tz36s	nf6tz36s	Despite efforts made to model and predict COVID-19 transmission, large predictive uncertainty remains. Failure to understand the dynamics of the nonlinear pandemic prediction model is an important reason. To this end, local and multiple global sensitivity analysis approaches are synthetically applied to analyze the sensitivities of parameters and initial state variables and community size (N) in …	Understanding the dynamics of pandemic models to support predictions of COVID-19 transmission: Parameter sensitivity analysis of the SIR-type model	-1	unanswerable	unanswerable	2022
sw4g4ble	sw4g4ble	The role of lockdown measures in mitigating COVID-19 in Mexico is investigated using a comprehensive nonlinear ODE model. The model includes both asymptomatic and presymptomatic populations with the latter leading to sickness (with recovery, hospitalization and death as possible outcomes). We consider situations involving the application of social-distancing and other intervention measures in the…	Lockdown measures and their impact on single- and two-age-structured epidemic model for the COVID-19 outbreak in Mexico	0	disease name: COVID-19 location: Mexico date: - R0 value: - %CI values: - method: comprehensive nonlinear ODE model	[{"contribution":{"disease name": "COVID-19", "location": "Mexico", "date": "-", "R0 value": "-", "%CI values": "-", "method": "comprehensive nonlinear ODE model"}}]	2021		102
jc0byl72	jc0byl72	Countries worldwide have adopted various strategies to minimize the socio-economic impact of the ongoing COVID-19 pandemic. Stringency of imposed measures universally reflects the standpoint from which protecting public health and avoiding damage to economy are seen as contradictory objectives. Based on epidemic trajectories of 25 highly developed countries and 10 US states in the (mobility reduc…	Pareto-based evaluation of national responses to COVID-19 pandemic shows that saving lives and protecting economy are non-trade-off objectives	-1	unanswerable	unanswerable	2021
80bn2wgd	80bn2wgd	Non-pharmaceutical interventions (NPIs) are founded to be effective to delay epidemic spread and to reduce the number of patients. Moderate NPIs took in Japan seemed to have reduced the COVID-19 patients and to lower death rates, thus, effects of those NPIs are worthy of investigation. We used open source data and divided the data into three periods: Jan 22 to Feb 25 (Period I), Feb 26 to Apr 6 (…	The effect of non-pharmaceutical interventions (NPIs) on the spread of COVID-19 pandemic in Japan: A modeling study	1	disease name: COVID-19 location: Japan date: Jan 22 to Feb 25 (Period I) R0 value: 4.66 %CI values: - method: SIRD model and the Monte Carlo Simulation | disease name: COVID-19 location: Japan date: Feb 26 to Apr 6 (Period II) R0 value: 2.50 %CI values: - method: SIRD model and the Monte Carlo Simulation | disease name: COVID-19 location: Japan date: Apr 7 to May 14 (Period III) R0 value: 1.79 %C…	[{"contribution":{"disease name": "COVID-19", "location": "Japan", "date": "Jan 22 to Feb 25 (Period I)", "R0 value": "4.66", "%CI values": "-", "method": "SIRD model and the Monte Carlo Simulation"}},{"contribution":{"disease name": "COVID-19", "location": "Japan", "date": "Feb 26 to Apr 6 (Period II)", "R0 value": "2.50", "%CI values": "-", "method": "SIRD model and the Monte Carlo Simulation"}…	2020-05-23 10:00:00		860
mhmc3ts8	mhmc3ts8	In the Czech Republic, the first COVID-19 cases were confirmed on 1 March 2020; early population interventions were adopted in the following weeks. A simple epidemiological model was developed to help decision-makers understand the course of the epidemic and perform short-term predictions. In this paper, we present the use of the model and estimated changes in the reproduction number (decrease fr…	Modelling the first wave of the COVID-19 epidemic in the Czech Republic and the role of government interventions	1	disease name: COVID-19 location: Czech Republic date: March and April 2020 R0 value: >2.00 to < 1.00 %CI values: - method: simple epidemiological model	[{"contribution":{"disease name": "COVID-19", "location": "Czech Republic", "date": "March and April 2020", "R0 value": ">2.00 to < 1.00", "%CI values": "-", "method": "simple epidemiological model"}}]	2020-09-11 10:00:00
t9109ckd	t9109ckd	Thailand was hit by the second wave of Coronavirus Disease 2019 (COVID-19) in a densely migrant-populated province (Samut Sakhon). COVID-19 vaccines were known to be effective; however, the supply was limited. Therefore, this study aimed to predict the effectiveness of ThailandÃ¢â‚¬â„¢s COVID-19 vaccination strategy. We obtained most of the data from the Ministry of Public Health. Deterministic s…	Prioritization of the Target Population for Coronavirus Disease 2019 (COVID-19) Vaccination Program in Thailand	1	disease name: Coronavirus Disease 2019 (COVID-19) location: Thailand date: - R0 value: reproduction number (R) between Thais and migrants was estimated at 1.25 and 2.5, respectively %CI values: - method: Deterministic system dynamics and compartmental models	[{"contribution":{"disease name": "Coronavirus Disease 2019 (COVID-19)", "location": "Thailand", "date": "-", "R0 value": "reproduction number (R) between Thais and migrants was estimated at 1.25 and 2.5, respectively", "%CI values": "-", "method": "Deterministic system dynamics and compartmental models"}}]	2021-10-14
bez86xik	bez86xik	Background and aim: A shutdown of businesses enacted during the SARS-CoV-2 pandemic can serve different goals, e.g., preventing the intensive care unit (ICU) capacity from being overwhelmed ('flattening the curve') or keeping the reproduction number substantially below one ('squashing the curve'). The aim of this study was to determine the clinical and economic value of a shutdown that is success…	The Clinical and Economic Value of a Successful Shutdown During the SARS-CoV-2 Pandemic in Germany	-1	unanswerable	unanswerable	2020
tvwlvoz6	tvwlvoz6	New habitat-based models for spread of hantavirus are developed which account for interspecies interaction. Existing habitat-based models do not consider interspecies pathogen transmission, a primary route for emergence of new infectious diseases and reservoirs in wildlife and man. The modeling of interspecies transmission has the potential to provide more accurate predictions of disease persiste…	A Habitat-Based Model for the Spread of Hantavirus Between Reservoir and Spillover Species	0	disease name: Hantavirus location: Paraguay date: - R0 value: - %CI values: - method: System of ordinary differential equations (ODE) and a continuous-time Markov chain (CTMC) model	[{"contribution":{"disease name": "Hantavirus", "location": "Paraguay", "date": "-", "R0 value": "-", "%CI values": "-", "method": "System of ordinary differential equations (ODE) and a continuous-time Markov chain (CTMC) model"}}]	2009-10-01 10:00:00
op1bes33	op1bes33	BACKGROUND: Bluetongue is a serious disease of ruminants caused by the bluetongue virus (BTV). BTV is transmitted by biting midges (Culicoides spp.). Serological evidence from livestock and the presence of at least one competent vector species of Culicoides suggests that transmission of BTV is possible and may have occurred in Kazakhstan. METHODS: We estimated the risk of transmission using a mat…	Modelling bluetongue risk in Kazakhstan	-1	unanswerable	unanswerable	2021-09-25
li6t5neo	li6t5neo	In December 2019, the first patients in Wuhan, China were diagnosed with a primary atypical pneumonia, which showed to be unknown and contagious. Since then, known as COVID-19 disease, the responsible viral pathogen, SARS-CoV-2, has spread around the world in a pandemic. Decisions on how to deal with the crisis are often based on simulations of the pandemic spread of the virus. The results of som…	COVID-19 mitigation strategies and overview on results from relevant studies in Europe	-1	unanswerable	unanswerable	2020
gfetl2xg	gfetl2xg	The Distributed Logistic Model and the Adaptive Logistic Model of epidemics are formulated and used to study the course of cases and deaths during the COVID-19 pandemic. The distributed model is designed to account for a spread of initiation times of hot spots across a country; it does especially well at capturing the initial and linear phases of epidemics. The adaptive model accounts for the dev…	Two New Models for Epidemics with Application to the COVID-19 Pandemic in the United States, Italy, and the United Kingdom	1	disease name: COVID-19 location: United States, Italy, and the United Kingdom date: - R0 value: 0.29 per day for each country %CI values: - method: Distributed Logistic Model and the Adaptive Logistic Model of epidemics	[{"contribution":{"disease name": "COVID-19", "location": "United States, Italy, and the United Kingdom", "date": "-", "R0 value": "0.29 per day for each country", "%CI values": "-", "method": "Distributed Logistic Model and the Adaptive Logistic Model of epidemics"}}]	2020-07-14
sqdk57f9	sqdk57f9	Documentation in scientific literature is not available on prospective evaluation of the efficiency of the unlock measure related to COVID-19 transmission change points in India, projecting the infected population, planning suitable measures related to future interventions and lifting of restrictions so that the economic settings are not damaged beyond repair. We have applied SIR model and Bayesi…	Detection of transmission change points during unlock-3 and unlock-4 measures controlling COVID-19 in India	1	disease name: COVID-19 location: India date: 1 August 2020 to 30 September 2020 R0 value: 1 %CI values: - method: SIR model and Bayesian approach combined with Monte Carlo Markov algorithms	[{"contribution":{"disease name": "COVID-19", "location": "India", "date": "1 August 2020 to 30 September 2020", "R0 value": "1", "%CI values": "-", "method": "SIR model and Bayesian approach combined with Monte Carlo Markov algorithms"}}]	2020-11-18
7kfr88g8	7kfr88g8	Background. The effective reproduction number R(e)(t) is a critical measure of epidemic potential. R(e)(t) can be calculated in near real time using an incidence time series and the generation time distribution: the time between infection events in an infector-infectee pair. In calculating R(e)(t), the generation time distribution is often approximated by the serial interval distribution: the tim…	Estimating effective reproduction number using generation time versus serial interval, with application to covid-19 in the Greater Toronto Area, Canada	-1	unanswerable	unanswerable	2020-11-01 05:00:00
pghy7llh	pghy7llh	This paper introduces a multigroup COVID-19 model with immunity, in which the total population of each group is partitioned into five compartments, that is, susceptible, exposed, infective, infective in treatment and recovered compartment. If the basic reproduction number is less than or equal to one, and the infection graph is strongly connected, then the disease-free equilibrium is globally asy…	Control of a multigroup COVID-19 model with immunity: treatment and test elimination	-1	unanswerable	unanswerable	2020-09-30 10:00:00
q40upcz6	q40upcz6	OBJECTIVES: to describe the epidemic trends of COVID-19 over time and by area in the territory covered by Milan's Agency for Health Protection (ATS-MI) from February to May 2020. DESIGN: descriptive study of COVID-19 cases. SETTING AND PARTICIPANTS: a new information system was developed to record COVID-19 cases with positive nasopharyngeal swab. Patients resident in the area covered by ATS-MI wi…	Describing the epidemic trends of COVID-19 in the area covered by Agency for Health Protection of the Metropolitan Area of Milan	1	disease name: COVID-19 location: Metropolitan Area of Milan date: February to May 2020 R0 value: 3.0 %CI values: - method: -	[{"contribution":{"disease name": "COVID-19", "location": "Metropolitan Area of Milan", "date": "February to May 2020", "R0 value": "3.0", "%CI values": "-", "method": "-"}}]	2020
0e0gnsb4	7styuuzo	Background: A novel coronavirus strain, severe acute respiratory syndrome coronavirus 2 (SARS-CoV-2), emerged in China in late 2019. The resulting disease, Coronavirus Disease 2019 (COVID-2019), soon became a pandemic. This study aims to characterize key attributes of the epidemiology of this infection in China. Methods: An age-stratified mathematical model was constructed to describe the transmi…	Characterizing key attributes of the epidemiology of COVID-19 in China: Model-based estimations	1	disease name: Coronavirus Disease 2019 (COVID-2019) location: China date: late 2019 R0 value: 2.1 %CI values: (95% UI=1.8-2.4) method: age-stratified mathematical model | disease name: Coronavirus Disease 2019 (COVID-2019) location: China date: following onset of interventions R0 value: 0.06 %CI values: (95% UI=0.05-0.07) method: age-stratified mathematical model	[{"contribution":{"disease name": "Coronavirus Disease 2019 (COVID-2019)", "location": "China", "date": "late 2019", "R0 value": "2.1", "%CI values": "(95% UI=1.8-2.4)", "method": "age-stratified mathematical model"}},{"contribution":{"disease name": "Coronavirus Disease 2019 (COVID-2019)", "location": "China", "date": "following onset of interventions", "R0 value": "0.06", "%CI values": "(95% UI…	2020-04-11	change_main_cord_id	25
b03s7wsw	b03s7wsw	BACKGROUND: Ambulatory antibiotic prescriptions without a clinic visit or without documentation of infection could represent overuse and contribute to adverse outcomes. We aim to describe US ambulatory antibiotic prescribing, including those without an associated visit or infection diagnosis. METHODS: We conducted an observational cohort study using data of all patients receiving antibacterial, a…	Non-visit-based and non-infection-related antibiotic use in the US: a cohort study of privately insured patients during 2016-2018	-1	unanswerable	unanswerable	2021-08-01 10:00:00
30sh7zwv	30sh7zwv	We propose a stochastic SIR model, specified as a system of stochastic differential equations, to analyse the data of the Italian COVID-19 epidemic, taking also into account the under-detection of infected and recovered individuals in the population. We find that a correct assessment of the amount of under-detection is important to obtain reliable estimates of the critical model parameters. Moreo…	A stochastic SIR model for the analysis of the COVID-19 Italian epidemic	-1	unanswerable	unanswerable	2021
5aur6xd4	5aur6xd4	Coronavirus disease 2019 (COVID-19), caused by severe acute respiratory syndrome coronavirus - 2 (SARS-CoV-2), was declared a global pandemic on 11th March, 2020 by World Health Organization. As of now,27th May,2020, there are about 54,88,825 infected cases and 3,49,095 deaths globally. Coronavirus samples collected from all the countries have been sequenced for advanced studies in a bid to under…	Comparative analysis of SARS-CoV2 with special emphasis on genome sequences	1	disease name: Coronavirus disease 2019 (COVID-19) location: Global date: 27th May, 2020 R0 value: 1.4- 5.7 %CI values: - method: -	[{"contribution":{"disease name": "Coronavirus disease 2019 (COVID-19)", "location": "Global", "date": "27th May, 2020", "R0 value": "1.4- 5.7", "%CI values": "-", "method": "-"}}]	2020
103c8wtt	103c8wtt	A series of spreadsheet simulations using SEIS, SEIR, and SEIRS models showed that different durations of effective immunity could have important consequences for the prevalence of an epidemic disease with COVID-19 characteristics. Immunity that lasted four weeks, twelve weeks, six months, one year, and two years was tested with pathogen R0 values of 1.5, 2.3, and 3.0. Shorter durations of immuni…	The Influence of Time-Limited Immunity on a COVID-19 Epidemic: A Simulation Study	-1	unanswerable	unanswerable	2020-06-29 10:00:00
5hn193c7	5hn193c7	As of January 19, 2021, the cumulative number of people infected with coronavirus disease-2019 (COVID-19) in the United States has reached 24,433,486, and the number is still rising. The outbreak of the COVID-19 epidemic has not only affected the development of the global economy but also seriously threatened the lives and health of human beings around the world. According to the transmission cha…	Modeling the COVID-19 Epidemic With Multi-Population and Control Strategies in the United States	0	disease name: COVID-19 location: United States date: As of January 19, 2021 R0 value: - %CI values: - method: theoretical differential equation mathematical model, estimated model parameters through epidemiological data, obtained accurate mathematical models, and adopted global sensitivity analysis methods	[{"contribution":{"disease name": "COVID-19", "location": "United States", "date": "As of January 19, 2021", "R0 value": "-", "%CI values": "-", "method": "theoretical differential equation mathematical model, estimated model parameters through epidemiological data, obtained accurate mathematical models, and adopted global sensitivity analysis methods"}}]	2022-01-03
xab2t2j6	xab2t2j6	Social distancing measures have been implemented in the United States (US) since March 2020, to mitigate the spread of SARS-CoV-2, the causative agent of COVID-19. However, by mid-May most states began relaxing these measures to support the resumption of economic activity, even as disease incidence continued to increase in many states. To evaluate the impact of relaxing social distancing restrict…	State-level impact of social distancing and testing on COVID-19 in the United States	-1	unanswerable	unanswerable	2020-07-07 10:00:00
y63r6v0r	y63r6v0r	Background: Since the beginning of the COVID-19 pandemic, researchers and health authorities have sought to identify the different parameters that govern their infection and death cycles, in order to be able to make better decisions. In particular, a series of reproduction number estimation models have been presented, with different practical results. Objective: This article aims to present an ef…	COVID-19: Time-Dependent Effective Reproduction Number and Sub-notification Effect Estimation Modeling	-1	unanswerable	unanswerable	2020-07-30 10:00:00
b1mp3tn5	b1mp3tn5	The estimation of unknown parameters in simulations, also known as calibration, is crucial for practical management of epidemics and prediction of pandemic risk. A simple yet widely used approach is to estimate the parameters by minimizing the sum of the squared distances between actual observations and simulation outputs. It is shown in this paper that this method is inefficient, particularly wh…	Efficient calibration for imperfect epidemic models with applications to the analysis of COVID-19	0	disease name: COVID-19 location: 20 countries date: - R0 value: - %CI values: - method: SEIR (Susceptible-Exposed-Infectious-Recovered) model with both deterministic and stochastic simulations	[{"contribution":{"disease name": "COVID-19", "location": "20 countries", "date": "-", "R0 value": "-", "%CI values": "-", "method": "SEIR (Susceptible-Exposed-Infectious-Recovered) model with both deterministic and stochastic simulations"}}]	2020-09-26 10:00:00
iwdng6fr	iwdng6fr	Colleges and other organizations are considering testing plans to return to operation as the COVID-19 pandemic continues. Pre-symptomatic spread and high false negative rates for testing may make it difficult to stop viral spread. Here, we develop a stochastic agent-based model of COVID-19 in a university sized population, considering the dynamics of both viral load and false negative rate of tes…	Temporal dynamics of viral load and false negative rate influence the levels of testing necessary to combat COVID-19 spread	-1	unanswerable	unanswerable	2021
frivrm3s	frivrm3s	This paper studies the SEIRD epidemic model for COVID-19. First, I show that the model is poorly identified from the observed number of deaths and confirmed cases. There are many sets of parameters that are observationally equivalent in the short run but lead to markedly different long run forecasts. Second, I show that the basic reproduction number [Formula: see text] can be identified from the …	Identification and estimation of the SEIRD epidemic model for COVID-19	-1	unanswerable	unanswerable	2020-07-30 10:00:00
mo7yn6mc	mo7yn6mc	This is work in progress. We make it accessible hoping that people might find the idea useful. We propose a discrete, recursive 5-compartment model for the spread of epidemics, which we call {\em SEPIR-model}. Under mild assumptions which typically are fulfilled for the Covid-19 pandemic it can be used to reproduce the development of an epidemic from a small number of parameters closely related t…	Proposal of a recursive compartment model of epidemics and applications to the Covid-19 pandemic	-1	unanswerable	unanswerable	2020-09-01 10:00:00
p8rnoqt6	p8rnoqt6	With the recent outbreak of COVID-19, the reach and scale of COVID-19 cases is top of mind for everyone and many research groups are actively monitoring and exploring the potential spread. A positive consequence of past epidemics and pandemics is that there are sound epidemiological compartmental modelling approaches that can effectively model disease spread. With minor changes to the underlying …	A Study of the COVID-19 Impacts on the Canadian Population	-1	unanswerable	unanswerable	2020
ajdca6sj	ajdca6sj	Despite the adoption of a national immunization program in China, the incidence of mumps remains high. This study aimed to describe the epidemiological characteristics, including the time, region, occupation, and age, of mumps in Wuhan from 2005 to 2018 and to evaluate its transmissibility. In this study, the susceptibleÃ¢â‚¬â€œexposedÃ¢â‚¬â€œinfectiousÃ¢â‚¬â€œasymptomaticÃ¢â‚¬â€œrecovered (SEIAR…	Estimating the Transmissibility of Mumps: A Modelling Study in Wuhan City, China	-1	unanswerable	unanswerable	2021-08-03
i5jq6bgp	i5jq6bgp	OBJECTIVE: This research aimed to explore the application of a mathematical model based on deep learning in hospital infection control of novel coronavirus (COVID-19) pneumonia. METHODS: First, the epidemic data of Beijing, China, were utilized to make a definite susceptible-infected-removed (SIR) model fitting to determine the estimated value of the COVID-19 removal intensity ÃŽÂ², which was the…	Susceptible-Infected-Removed Mathematical Model under Deep Learning in Hospital Infection Control of Novel Coronavirus Pneumonia	-1	unanswerable	unanswerable	2021-10-27 10:00:00
jpk03ap9	jpk03ap9	Given maximal social distancing duration and intensity, how can one minimize the epidemic final size, or equivalently the total number of individuals infected during the outbreak? A complete answer to this question is provided and demonstrated here for the SIR epidemic model. In this simplified setting, the optimal solution consists in enforcing the highest confinement level during the longest al…	How best can finite-time social distancing reduce epidemic final size?	-1	unanswerable	unanswerable	2021
at1jvlnn	at1jvlnn	COVID-19 is a viral disease that is caused by Severe Acute Respiratory Syndrome coronavirus 2 (SARSCoV-2) which has no approved vaccine. Based on the available non-pharmacological interventions like wearing of face masks, observing social distancing, and lockdown, this work assesses the impact of non-pharmaceutical control measures (social distancing and use of face-masks) and mass testing on the…	The role of mathematical model in curbing COVID-19 in Nigeria	1	disease name: COVID-19 location: Nigeria date: - R0 value: less than unity %CI values: - method: next-generation method	[{"contribution":{"disease name": "COVID-19", "location": "Nigeria", "date": "-", "R0 value": "less than unity", "%CI values": "-", "method": "next-generation method"}}]	2020		546
smznem1d	smznem1d	Pandemics, such as Covid-19 and AIDS, tend to be highly contagious and have the characteristics of global spread and existence of multiple virus strains. To analyze the competition among different strains, a high dimensional SIR model studying multiple strains' competition in patchy environments is introduced in this work. By introducing the basic reproductive number of different strains, we foun…	The Global dynamics of a SIR model considering competitions among multiple strains in patchy environments	-1	unanswerable	unanswerable	2022
zb3aybzg	zb3aybzg	BACKGROUND: More than half of the global population is under strict forms of social distancing. Estimating the expected impact of lockdown and exit strategies is critical to inform decision makers on the management of the COVID-19 health crisis. METHODS: We use a stochastic age-structured transmission model integrating data on age profile and social contacts in ÃƒÅ½le-de-France to (i) assess the …	Impact of lockdown on COVID-19 epidemic in ÃƒÅ½le-de-France and possible exit strategies	1	disease name: COVID-19 location: le-de-France date: prior to lockdown R0 value: 3.18 %CI values: [3.09, 3.24] (95% confidence interval) method: stochastic age-structured transmission model | disease name: COVID-19 location: le-de-France date: during lockdown R0 value: 0.68 %CI values: [0.66, 0.69] method: stochastic age-structured transmission model	[{"contribution":{"disease name": "COVID-19", "location": "le-de-France", "date": "prior to lockdown", "R0 value": "3.18", "%CI values": "[3.09, 3.24] (95% confidence interval)", "method": "stochastic age-structured transmission model"}},{"contribution":{"disease name": "COVID-19", "location": "le-de-France", "date": "during lockdown", "R0 value": "0.68", "%CI values": "[0.66, 0.69]", "method": "…	2020		1397
pys3ueum	pys3ueum	In order to explore the intrinsic laws of the spread of COVID-19 across the globe, this paper applies partial differential equation and related theories to model and carry out theoretical analysis and numerical analysis. Firstly, by adding the free diffusion term to the traditional ordinary differential SEIRS epidemic model, the corresponding partial differential epidemic model is established. Se…	Mathematical model establishment and simulation analysis of the spread of COVID-19 epidemic	0	disease name: COVID-19 location: across the globe date: - R0 value: - %CI values: - method: operator theory and spectral method	[{"contribution":{"disease name": "COVID-19", "location": "across the globe", "date": "-", "R0 value": "-", "%CI values": "-", "method": "operator theory and spectral method"}}]	2021
0xb67cv2	0xb67cv2	Following the outbreak of COVID-19 pandemic, governments around the globe coerced their citizens to adhere to preventive health behaviours, aiming to reduce the effective reproduction numbers of the virus. Driven by game theoretic considerations and inspired by the work of US National Research Council's Committee on Food Habits (1943) during WWII, and the post-WWII Yale Communication Research Pro…	The behavioural challenge of the COVID-19 pandemic: indirect measurements and personalized attitude changing treatments (IMPACT)	-1	unanswerable	unanswerable	2020-08-26 10:00:00
yt300mbt	yt300mbt	Background: The coronavirus pandemic (COVID-19) is causing a havoc globally, exacerbated by the newly discovered SARS-CoV-2 virus. Due to its high population density, India is one of the most badly effected countries from the first wave of COVID-19. Therefore, it is extremely necessary to accurately predict the state-wise and overall dynamics of COVID-19 to get the effective and efficient organiz…	A study of the COVID-19 epidemic in India using the SEIRD model	0	disease name: coronavirus pandemic (COVID-19) location: India date: - R0 value: - %CI values: - method: SEIRD epidemiological model	[{"contribution":{"disease name": "coronavirus pandemic (COVID-19)", "location": "India", "date": "-", "R0 value": "-", "%CI values": "-", "method": "SEIRD epidemiological model"}}]	2021
chpzxo43	chpzxo43	BACKGROUND: Since the first cluster of cases was identified in Wuhan City, China, in December 2019, coronavirus disease 2019 (COVID-19) rapidly spreads globally. Scientists have made strides in estimating key transmission and epidemiological parameters. In particular, accumulating evidence points to a substantial fraction of asymptomatic or subclinical infections, which influences our understandi…	Early epidemiological assessment of the transmission potential and virulence of coronavirus disease 2019 (COVID-19) in Wuhan City, China, January-February, 2020	1	disease name: COVID-19 location: Wuhan City, China date: 2019-2020 R0 value: 3.49 %CI values: (95% CrI 3.39-3.62) method: statistical methods | disease name: COVID-19 location: Wuhan City, China date: after January 23 in 2020 R0 value: 0.84 %CI values: (95% CrI 0.81-0.88) method: statistical methods	[{"contribution":{"disease name": "COVID-19", "location": "Wuhan City, China", "date": "2019-2020", "R0 value": "3.49", "%CI values": "(95% CrI 3.39-3.62)", "method": "statistical methods"}},{"contribution":{"disease name": "COVID-19", "location": "Wuhan City, China", "date": "after January 23 in 2020", "R0 value": "0.84", "%CI values": "(95% CrI 0.81-0.88)", "method": "statistical methods"}}]	2020		497
s2v7b4dv	s2v7b4dv	COVID-19 presents an urgent global challenge because of its contagious nature, frequently changing characteristics, and the lack of a vaccine or effective medicines. A model for measuring and preventing the continued spread of COVID-19 is urgently required to provide smart health care services. This requires using advanced intelligent computing such as artificial intelligence, machine learning, d…	Measuring and Preventing COVID-19 Using the SIR Model and Machine Learning in Smart Health Care	0	disease name: COVID-19 location: KSA date: - R0 value: - %CI values: - method: SIR and machine learning	[{"contribution":{"disease name": "COVID-19", "location": "KSA", "date": "-", "R0 value": "-", "%CI values": "-", "method": "SIR and machine learning"}}]	2020
248x096x	248x096x	This report describes an ongoing R03 grant that explores the links between trait reward sensitivity, substance use, and neural responses to social and nonsocial reward. Although previous research has shown that trait reward sensitivity and neural responses to reward are linked to substance use, whether this relationship is impacted by how people process social stimuli remains unclear. We are inve…	The Role of Social Reward and Corticostriatal Connectivity in Substance Use	-1	unanswerable	unanswerable	2020-10-29 05:00:00
xpy9el86	xpy9el86	The SARS-CoV-2 pandemic is one of the most concerning health problems around the globe. We reported the emergence of SARS-CoV-2 variant B.1.1.519 in Mexico City. We reported the effective reproduction number (Rt) of B.1.1.519 and presented evidence of its geographical origin based on phylogenetic analysis. We also studied its evolution via haplotype analysis and identified the most recurrent hapl…	The Evolutionary Landscape of SARS-CoV-2 Variant B.1.1.519 and Its Clinical Impact in Mexico City	-1	unanswerable	unanswerable	2021-10-29 10:00:00
cut3vf2c	cut3vf2c	Abstract Background: A new type of coronavirus (later named Sars-Cov-2) drew attention on 31 December 2019 after the reporting of 27 unidentified pneumonia cases detected in Wuhan, China to the World Health Organization (WHO). Rapid progression of the COVID-19 pandemic has revealed the necessity of epidemic modeling studies to evaluate the course of the epidemic and its burden on the health syste…	Nowcasting and Forecasting the Spread of COVID-19 and Healthcare Demand In Turkey, A Modelling Study	1	disease name: COVID-19 location: Turkey date: - R0 value: 3 %CI values: - method: SEIR modeling | disease name: COVID-19 location: Turkey date: - R0 value: 1.38 %CI values: - method: SEIR modeling 2nd scenario | disease name: COVID-19 location: Turkey date: - R0 value: 1.38 %CI values: - method: SEIR modeling 3rd scenario | disease name: COVID-19 location: Turkey date: - R0 value: 0.98 %CI values…	[{"contribution":{"disease name": "COVID-19", "location": "Turkey", "date": "-", "R0 value": "3", "%CI values": "-", "method": "SEIR modeling"}},{"contribution":{"disease name": "COVID-19", "location": "Turkey", "date": "-", "R0 value": "1.38", "%CI values": "-", "method": "SEIR modeling 2nd scenario"}},{"contribution":{"disease name": "COVID-19", "location": "Turkey", "date": "-", "R0 value": "1…	43938.4		715
xjufduyt	xjufduyt	Today, the world is fighting against a dangerous epidemic caused by the novel coronavirus, also known as COVID-19. All have been impacted and countries are trying to recover from the social, economic, and health devastations of COVID-19. Recent epidemiology research has concentrated on using different prediction models to estimate the numbers of infected, recovered, and deceased cases around the …	A Study on the Efficiency of the Estimation Models of COVID-19	-1	unanswerable	unanswerable	2021-06-11 10:00:00
er5ozxzl	er5ozxzl	Since December 2020, variants of COVID-19 (especially Delta and Omicron) appeared with different characteristics that influenced death and transmissibility emerged around the world. To address the novel dynamics of the disease, we propose a dynamical model of two strains, namely native and mutant, transmission dynamics with mutation and imperfect vaccination. It is also assumed that the recuperat…	Mutations make pandemics worse or better: modeling SARS-CoV-2 variants and imperfect vaccination	-1	unanswerable	unanswerable	2022-01-17 05:00:00
1vf94lg0	1vf94lg0	The Coronavirus disease of 2019 (COVID-19) is an ongoing public health concern worldwide. COVID-19 infections continue to occur and thus, it is important to assess the effects of various public health measures. This study aims to forecast COVID-19 cases by geographical area in Korea, based on the effects of different control-intervention intensities (CII). Methods involved estimating the effectiv…	Forecasting COVID-19 cases by assessing control-intervention effects in Republic of Korea: a statistical modeling approach	-1	unanswerable	unanswerable	2022-02-18 05:00:00
z6q11loy	z6q11loy	The coronavirus disease 2019 (COVID-19) pandemic has created unprecedented healthcare emergencies across the globe. The World Health Organization (WHO) has proposed social distancing (SD) as a prudent measure to contain the pandemic and, hence, governments have been enacting lockdowns of varied nature. These lockdowns, causing economic and social strain, warrant the development of quantitative mo…	COVID-19 Modeling in Saudi Arabia Using the Modified Susceptible-Exposed-Infectious-Recovered (SEIR) Model	1	disease name: coronavirus disease 2019 (COVID-19) location: Saudi Arabia date: - R0 value: 0.6014 and 2.7860 %CI values: - method: Modified Susceptible-Exposed-Infectious-Recovered (SEIR) Model	[{"contribution":{"disease name": "coronavirus disease 2019 (COVID-19)", "location": "Saudi Arabia", "date": "-", "R0 value": "0.6014 and 2.7860", "%CI values": "-", "method": "Modified Susceptible-Exposed-Infectious-Recovered (SEIR) Model"}}]	2020-09-14
204w2huq	204w2huq	BACKGROUND: After more than six months into the coronavirus disease (COVID-19) pandemic, as of August 10, 2020, over 734,664 people had died worldwide. The current study aims to evaluate how mitigating interventions affected the epidemic process in the 30 largest metropolitan areas in the US and whether temperature played a role in the epidemic process. METHODS: Publicly available data for the ti…	Impact of mitigating interventions and temperature on the instantaneous reproduction number in the COVID-19 pandemic among 30 US metropolitan areas	-1	unanswerable	unanswerable	2020-08-22 10:00:00
pz9lsaw6	pz9lsaw6	The relationship between epidemiology, mathematical modeling and computational tools allows to build and test theories on the development and battling of a disease. This PhD thesis is motivated by the study of epidemiological models applied to infectious diseases in an Optimal Control perspective, giving particular relevance to Dengue. Dengue is a subtropical and tropical disease transmitted by m…	Optimal Control and Numerical Optimization Applied to Epidemiological Models	-1	unanswerable	unanswerable	2014-01-29 05:00:00
dy2tige9	dy2tige9	In this article, we develop a mathematical model considering susceptible, exposed, infected, asymptotic, quarantine/isolation and recovered classes as in case of COVID-19 disease. The facility of quarantine/isolation have been provided to both exposed and infected classes. Asymptotic individuals either recovered without undergo treatment or moved to infected class after some duration. We have for…	A nonlinear epidemiological model considering asymptotic and quarantine classes for SARS CoV-2 virus	0	disease name: COVID-19 location: - date: - R0 value: - %CI values: - method: A nonlinear epidemiological model considering asymptotic and quarantine classes	[{"contribution":{"disease name": "COVID-19", "location": "-", "date": "-", "R0 value": "-", "%CI values": "-", "method": "A nonlinear epidemiological model considering asymptotic and quarantine classes"}}]	2020-06-04 10:00:00
6a6njt3u	6a6njt3u	Background: Novel coronavirus (SARS-CoV-2) has extended its range of transmission in all parts of the world, with substantial variation in rates of transmission and severity of associated disease. Many countries have implemented social distancing as a measure to control further spread. Methods: We evaluate whether and under which conditions containment or slowing down COVID-19 epidemics are possi…	Isolation and contact tracing can tip the scale to containment of COVID-19 in populations with social distancing	-1	unanswerable	unanswerable	2020-03-13 05:00:00
eb8ysg2b	eb8ysg2b	We propose a mathematical model to simulate the SARS outbreak in Beijing. The model consists of six subpopulations, namely susceptible, exposed, quarantined, suspect, probable and removed, as China started to report SARS cases as suspect and probable separately from April 27 and cases transferred from suspect class to probable class from May 2. By simplifying the model to a two-compartment suspec…	Simulating the SARS outbreak in Beijing with limited data	1	disease name: SARS location: Beijing date: from April 27 and cases transferred from suspect class to probable class from May 2 R0 value: 1.0698 to 3.2524 %CI values: - method: two-compartment suspect-probable model and a single-compartment probable model	[{"contribution":{"disease name": "SARS", "location": "Beijing", "date": "from April 27 and cases transferred from suspect class to probable class from May 2", "R0 value": "1.0698 to 3.2524", "%CI values": "-", "method": "two-compartment suspect-probable model and a single-compartment probable model"}}]	2004-04-07
r3gvxz2y	r3gvxz2y	Background: Recent outbreak of 2019-nCoV in Wuhan raised serious public health concerns. By February 15, 2020 in Wuhan, the total number of confirmed infection cases has reached 37 914, and the number of deaths has reached 1123, accounting for 56.9% of the total confirmed cases and 73.7% of the total deaths in China. People are eager to know when the epidemic will be completely controlled and whe…	When will the battle against novel coronavirus end in Wuhan: A SEIR modeling analysis	1	disease name: 2019-nCoV location: Wuhan date: after the closure of Wuhan city till February 12, 2020 R0 value: 1.44 %CI values: interquartile range: 1.40-1.47 method: SEIR modeling method	[{"contribution":{"disease name": "2019-nCoV", "location": "Wuhan", "date": "after the closure of Wuhan city till February 12, 2020", "R0 value": "1.44", "%CI values": "interquartile range: 1.40-1.47", "method": "SEIR modeling method"}}]	2020		814
82nuvva9	82nuvva9	We augment the well-known susceptible - infected - recovered - deceased (SIRD) epidemiological model to include vaccination dynamics, implemented as a piecewise continuous simulation. We calibrate this model to reported case data in the UK at a national level. Our modelling approach decouples the inherent characteristics of the infection from the degree of human interaction (as defined by the eff…	Mechanistic model calibration and the dynamics of the COVID-19 epidemic in the UK (the past, the present and the future)	1	disease name: COVID-19 location: UK date: March 2020 and May 2020 R0 value: 3.23 %CI values: - method: susceptible - infected - recovered - deceased (SIRD) epidemiological model	[{"contribution":{"disease name": "COVID-19", "location": "UK", "date": "March 2020 and May 2020", "R0 value": "3.23", "%CI values": "-", "method": "susceptible - infected - recovered - deceased (SIRD) epidemiological model"}}]	2021-05-22 10:00:00
b0f5ysxf	b0f5ysxf	Epidemics generally spread through a succession of waves that reflect factors on multiple timescales. On short timescales, super-spreading events lead to burstiness and overdispersion, while long-term persistent heterogeneity in susceptibility is expected to lead to a reduction in the infection peak and the herd immunity threshold (HIT). Here, we develop a general approach to encompass both times…	Time-dependent heterogeneity leads to transient suppression of the COVID-19 epidemic, not herd immunity	-1	unanswerable	unanswerable	2021
5t08uwkz	5t08uwkz	Background COVID-19 spread may have a dramatic impact in countries with vulnerable economies and limited availability of, and access to, healthcare resources and infrastructures. However, in sub-Saharan Africa a low prevalence and mortality have been observed so far. Methods We collected data on individual social contacts in Ethiopia across geographical contexts characterized by heterogeneous pop…	Demography, social contact patterns and the COVID-19 burden in different settings of Ethiopia: a modeling study	-1	unanswerable	unanswerable	2020-11-24 05:00:00
q6pz6l2b	q6pz6l2b	In this paper, we estimate the reproductive number R0 of COVID-19 based on Wallinga and Lipsitch framework {11} and a novel statistical time delay dynamic system. We use the observed data reported in CCDC's paper to estimate distribution of the generation interval of the infection and apply the simulation results from the time delay dynamic system as well as released data from CCDC to fit the gro…	The reproductive number R0 of COVID-19 based on estimate of a statistical time delay dynamical system	1	disease name: COVID-19 location: - date: - R0 value: 3.25-3.4 %CI values: - method: Wallinga and Lipsitch framework {11} and a novel statistical time delay dynamic system	[{"contribution":{"disease name": "COVID-19", "location": "-", "date": "-", "R0 value": "3.25-3.4", "%CI values": "-", "method": "Wallinga and Lipsitch framework {11} and a novel statistical time delay dynamic system"}}]	2020-02-20 05:00:00
p8ido632	p8ido632	BACKGROUND: Wuhan was the first epicentre of COVID-19 in the world, accounting for 80% of cases in China during the first wave. We aimed to assess household transmissibility of severe acute respiratory syndrome coronavirus 2 (SARS-CoV-2) and risk factors associated with infectivity and susceptibility to infection in Wuhan. METHODS: This retrospective cohort study included the households of all la…	Household transmission of SARS-CoV-2 and risk factors for susceptibility and infectivity in Wuhan: a retrospective observational study	-1	unanswerable	unanswerable	2021
aiz57q5n	aiz57q5n	Multimodal treatment including surgery and chemotherapy is considered the gold standard treatment of pancreatic cancer by most guidelines. Neoadjuvant therapy (NAT) has been seen as a possible treatment option for resectable, borderline resectable and locally advanced PaC. The aim of this paper is to offer a state-of-the-art review on neoadjuvant treatments in the setting of pancreatic ductal ade…	Neoadjuvant therapy for pancreatic cancer	-1	unanswerable	unanswerable	2021-10-09 10:00:00
kqkn7imd	kqkn7imd	We present an epidemic model capable of describing key features of the Covid-19 pandemic. While capturing several qualitative properties of the virus spreading, it allows to compute the basic reproduction number, the number of deaths due to the virus and various other statistics. Numerical integrations are used to illustrate the adherence of the evolutions described by the model to specific well …	An age and space structured SIR model describing the Covid-19 pandemic	0	disease name: Covid-19 location: - date: - R0 value: - %CI values: - method: An age and space structured SIR model	[{"contribution":{"disease name": "Covid-19", "location": "-", "date": "-", "R0 value": "-", "%CI values": "-", "method": "An age and space structured SIR model"}}]	2020-08-08 10:00:00		368
yogjoo2a	yogjoo2a	The Mathematical and Theoretical Biology Institute (MTBI) is a national award winning Research Experience for Undergraduates (REU) that has been running every summer since 1996. Since 1997, students have developed and proposed their own research questions and derived their research projects from them as the keystone of the program. Because MTBIÃ¢â‚¬â„¢s mentors have no control over what students …	A Tour of the Basic Reproductive Number and the Next Generation of Researchers	-1	unanswerable	unanswerable	2020-02-18
zefl5ul8	zefl5ul8	Although many persons in the United States have acquired immunity to COVID-19, either through vaccination or infection with SARS-CoV-2, COVID-19 will pose an ongoing threat to non-immune persons so long as disease transmission continues. We can estimate when sustained disease transmission will end in a population by calculating the population-specific basic reproduction number R_0, the expected n…	Bayesian Inference of State-Level COVID-19 Basic Reproduction Numbers across the United States	1	disease name: COVID-19 location: New Jersey, United States date: 21-January-2020 to 21-June-2020 R0 value: 7.1 %CI values: - method: Bayesian inference | disease name: COVID-19 location: Wyoming, United States date: 21-January-2020 to 21-June-2020 R0 value: 2.3 %CI values: - method: Bayesian inference	[{"contribution":{"disease name": "COVID-19", "location": "New Jersey, United States", "date": "21-January-2020 to 21-June-2020", "R0 value": "7.1", "%CI values": "-", "method": "Bayesian inference"}},{"contribution":{"disease name": "COVID-19", "location": "Wyoming, United States", "date": "21-January-2020 to 21-June-2020", "R0 value": "2.3", "%CI values": "-", "method": "Bayesian inference"}}]	2021-09-28		187
2lkkj1fk	2lkkj1fk	A SEIR model with an added fomite term is used to constrain the contribution of fomites to the spread of COVID-19 under the Spring 2020 lockdown in the UK. Assuming uniform priors on the reproduction number in lockdown and the fomite transmission rate, an upper limit is found on the fomite transmission rate of less than 1 contaminated object in 7 per day per infectious person (95% CL). Basing the…	The fomite contribution to the transmission of COVID-19 in the UK: an evolutionary population estimate	-1	unanswerable	unanswerable	2021
pxvu5wdn	pxvu5wdn	In the recent COVID-19 pandemic, mathematical modeling constitutes an important tool to evaluate the prospective effectiveness of non-pharmaceutical interventions (NPIs) and to guide policy-making. Most research is, however, centered around characterizing the epidemic based on point estimates like the average infectiousness or the average number of contacts. In this work, we use stochastic simula…	Why ODE models for COVID-19 fail: Heterogeneity shapes epidemic dynamics	-1	unanswerable	unanswerable	2021-03-26 05:00:00
733e9ojg	733e9ojg	Mathematical and computational modeling approaches are increasingly used as quantitative tools in the analysis and forecasting of infectious disease epidemics. The growing need for realism in addressing complex public health questions is, however, calling for accurate models of the human contact patterns that govern the disease transmission processes. Here we present a data-driven approach to gen…	Inferring high-resolution human mixing patterns for disease modeling	-1	unanswerable	unanswerable	2021-01-12
v5y9s97b	v5y9s97b	BACKGROUND: Highly refined surveillance data on the 2009 A/H1N1 influenza pandemic are crucial to quantify the spatial and temporal characteristics of the pandemic. There is little information about the spatial-temporal dynamics of pandemic influenza in South America. Here we provide a quantitative description of the age-specific morbidity pandemic patterns across administrative areas of Peru. ME…	Spatial and Temporal Characteristics of the 2009 A/H1N1 Influenza Pandemic in Peru	1	disease name: 2009 A/H1N1 Influenza location: Peru, Lima metropolitan area date: May 1 to December 31, 2009 R0 value: 1.6-2.2 %CI values: - method: - | disease name: 2009 A/H1N1 Influenza location: Peru, rest of Peru date: May 1 to December 31, 2009 R0 value: 1.3-1.5 %CI values: - method: -	[{"contribution":{"disease name": "2009 A/H1N1 Influenza", "location": "Peru, Lima metropolitan area", "date": "May 1 to December 31, 2009", "R0 value": "1.6-2.2", "%CI values": "-", "method": "-"}},{"contribution":{"disease name": "2009 A/H1N1 Influenza", "location": "Peru, rest of Peru", "date": "May 1 to December 31, 2009", "R0 value": "1.3-1.5", "%CI values": "-", "method": "-"}}]	2011-06-21 10:00:00		1172
pgkblrw3	pgkblrw3	In February 2020, the exponential growth of COVID-19 cases in Wuhan city posed a huge economic burden to local medical systems. Consequently, Wuhan established Fangcang Shelter hospitals as a One Health approach for responding to and containing the COVID-19 outbreak by isolating and caring for mild-to-moderate cases. However, it is unclear to what degree the hospitals contained COVID-19. This stu…	Fangcang shelter hospitals are a One Health approach for responding to the COVID-19 outbreak in Wuhan, China	1	disease name: COVID-19 location: Wuhan, China date: February 2020 R0 value: 4.0 to 2.0 %CI values: - method: interrupted time series analysis	[{"contribution":{"disease name": "COVID-19", "location": "Wuhan, China", "date": "February 2020", "R0 value": "4.0 to 2.0", "%CI values": "-", "method": "interrupted time series analysis"}}]	2020-08-29
i7l6tqdk	i7l6tqdk	Novel coronavirus (COVID-19) caused by severe acute respiratory syndrome coronavirus 2 (SARS-CoV-2) is an epidemic declared by the World Health Organization (WHO). Till now in June 13, 2020, the total COVID-19 cases in different countries around the world are 77,56,905 with 4,28,576 deaths and 3,974,422 recovered. The virus has taken spread in India as well, whereas of June 13, 2020, 3,09,603 cas…	Transmission dynamics and estimation of basic reproduction number (R0 ) from early outbreak of novel coronavirus (covid-19) in india	1	disease name: Novel Coronavirus (COVID-19) location: India date: - R0 value: 1.53 to 3.25 %CI values: - method: R packages 'R0' and 'earlyR'	[{"contribution":{"disease name": "Novel Coronavirus (COVID-19)", "location": "India", "date": "-", "R0 value": "1.53 to 3.25", "%CI values": "-", "method": "R packages 'R0' and 'earlyR'"}}]	2020
duvwdoub	duvwdoub	OBJECTIVES: To assess the potential impacts of successive lockdown-easing measures in England, at a point in the COVID-19 pandemic when community transmission levels were relatively high. DESIGN: We developed a Bayesian model to infer incident cases and reproduction number (R) in England, from incident death data. We then used this to forecast excess cases and deaths in multiple plausible scenari…	Modelling the impact of lockdown-easing measures on cumulative COVID-19 cases and deaths in England	1	disease name: COVID-19 location: England date: 13 May 2020 R0 value: 0.75 %CI values: - method: Bayesian model	[{"contribution":{"disease name": "COVID-19", "location": "England", "date": "13 May 2020", "R0 value": "0.75", "%CI values": "-", "method": "Bayesian model"}}]	2021-09-08
gk1vosah	gk1vosah	RESUMEN Objetivo Predecir el nÃƒÂºmero de casos de COVID-19 en la ciudad de Cali-Colombia mediante el desarrollo de un modelo SEIR. MÃƒÂ©todos Se utilizÃƒÂ³ un modelo determinista compartimental SEIR considerando los estados: susceptibles (S), expuestos (E), infectados (I) y recuperados (R). Los parÃƒÂ¡metros del modelo fueron seleccionados de acuerdo a la revisiÃƒÂ³n de literatura. En el caso de…	Predicciones de un modelo SEIR para casos de COVID-19 en Cali, Colombia/ Predictions of a SEIR model for COVID-19 cases in Cali-Colombia	-1	unanswerable	unanswerable	2020
wqw14s93	wqw14s93	Quantifying the effectiveness of large-scale non-pharmaceutical interventions against COVID-19 is critical to adapting responses against future waves of the pandemic. By combining phylogenetic data of 5,198 SARS-CoV-2 genomes with the chronology of non-pharmaceutical interventions in 57 countries, we examine how interventions and combinations thereof alter the divergence rate of viral lineages, w…	SARS-CoV-2 phylodynamics differentiates the effectiveness of non-pharmaceutical interventions	-1	unanswerable	unanswerable	2020-08-26 10:00:00
kwz6l6a2	kwz6l6a2	On the basis of a semi-realistic SIR microsimulation for Germany and Poland, we show that the R0 parameter interval for which the COVID-19 epidemic stays overcritical but below the capacity limit of the health care system to reach herd immunity is so narrow that a successful implementation of this strategy is likely to fail. Our microsimulation is based on official census data and involves househ…	Mitigation and herd immunity strategy for COVID-19 is likely to fail	-1	unanswerable	unanswerable	2020-03-30 10:00:00
rd8xazlz	rd8xazlz	Simultaneously controlling COVID-19 epidemics and limiting economic and societal impacts presents a difficult challenge, especially with limited public health budgets. Testing, contact tracing, and isolating/quarantining is a key strategy that has been used to reduce transmission of SARS-CoV-2, the virus that causes COVID-19. However, manual contact tracing is a time-consuming process and as case…	Contact tracing efficiency, transmission heterogeneity, and accelerating COVID-19 epidemics	-1	unanswerable	unanswerable	2020-09-07 10:00:00		679
2xl0gp1o	2xl0gp1o	Since the detection of the first case of COVID-19 in Chile on March 3(rd), 2020, a total of 513,188 cases, including ~14,302 deaths have been reported in Chile as of November 2(nd), 2020. Here, we estimate the reproduction number throughout the epidemic in Chile and study the effectiveness of control interventions especially the effectiveness of lockdowns by conducting short-term forecasts based …	Transmission dynamics and control of COVID-19 in Chile, March-October, 2020	1	disease name: COVID-19 location: Chile date: March-October, 2020 R0 value: 1.8 %CI values: (95% CI: 1.6, 1.9) method: short-term forecasts based on the early transmission dynamics of COVID-19 | disease name: COVID-19 location: Chile, Greater Santiago and other municipalities date: as of November 2(nd), 2020 R0 value: 0.96 %CI values: (95% CI: 0.95, 0.98) method: short-term forecasts based on the …	[{"contribution":{"disease name": "COVID-19", "location": "Chile", "date": "March-October, 2020", "R0 value": "1.8", "%CI values": "(95% CI: 1.6, 1.9)", "method": "short-term forecasts based on the early transmission dynamics of COVID-19"}},{"contribution":{"disease name": "COVID-19", "location": "Chile, Greater Santiago and other municipalities", "date": "as of November 2(nd), 2020", "R0 value":…	2021-01-22 05:00:00		1083
ztrmpvbr	ztrmpvbr	BACKGROUND: As one of the strategies to mitigate the COVID-19 pandemic, social distancing (SD) measures are recommended to control disease spread and reduce the attack rate. Therefore, this study aims to estimate the costs and effects of SD measures through school closures, workforce, and community contact reductions for mitigating the COVID-19 pandemic in Indonesia. METHODS: Two mitigation scena…	The cost-effectiveness of social distancing measures for mitigating the COVID-19 pandemic in a highly-populated country: A case study in Indonesia	-1	unanswerable	unanswerable	2021-12-23 05:00:00
du5bdjlp	du5bdjlp	Information on severe acute respiratory syndrome coronavirus-2 (SARS-CoV-2) spread in Africa is limited by fragile 2 surveillance systems and insufficient diagnostic capacity. 3 We assessed the coronavirus disease-19 (COVID-19)-related diagnostic workload in Benin, Western Africa, 4 characterized SARS-CoV-2 genomes from 12 acute cases of COVID-19, used those together with public data to 5 estimat…	Diagnostics and spread of SARS-CoV-2 in Western Africa: An observational laboratory-based study from Benin	-1	unanswerable	unanswerable	2020-07-08 10:00:00
e05oyl8r	e05oyl8r	We derive a novel hybrid approach, a combination of neural networks and inverse problem, in order to forecast COVID-19 cases, and more generally any infectious disease. For this purpose, we extract a second order nonlinear differential equation for the total confirmed cases from a SIR-like model. That differential equation is the key factor of the present study. The neural network and inverse pro…	A hybrid approach to predict COVID-19 cases using neural networks and inverse problem	1	disease name: COVID-19 location: Canada date: from 100 to 365 days of the current pandemic in Canada R0 value: closed to unity over a wide range %CI values: - method: second order nonlinear differential equation for the total confirmed cases from a SIR-like model	[{"contribution":{"disease name": "COVID-19", "location": "Canada", "date": "from 100 to 365 days of the current pandemic in Canada", "R0 value": "closed to unity over a wide range", "%CI values": "-", "method": "second order nonlinear differential equation for the total confirmed cases from a SIR-like model"}}]	2022-05-17
eg8p2030	eg8p2030	Community quarantine has been resorted to by various governments to address the current COVID-19 pandemic; however, this is not the only non-therapeutic method of effectively controlling the spread of the infection. We study an SEIR model with nonlinear incidence rates, and introduce two parameters, and {varepsilon}, which mimics the effect of quarantine (Q). We compare this with the Q-SEIR model…	Protection after Quarantine: Insights from a Q-SEIR Model with Nonlinear Incidence Rates Applied to COVID-19	-1	unanswerable	unanswerable	2020-06-09
8uxntauq	8uxntauq	The effectiveness of control measures to contain coronavirus disease 2019 (COVID-19) in Wanzhou, China was assessed. Epidemiological data were analyzed for 183 confirmed COVID-19 cases and their close contacts from five generations of transmission of severe acute respiratory syndrome coronavirus 2 throughout the entire COVID-19 outbreak in Wanzhou. Approximately 67.2% and 32.8% of cases were symp…	Effective control of SARS-CoV-2 transmission in Wanzhou, China.	1	disease name: coronavirus disease 2019 (COVID-19) location: Wanzhou, China date: - R0 value: 1.64 %CI values: 95% confidence interval: 1.16-2.40 method: -	[{"contribution":{"disease name": "coronavirus disease 2019 (COVID-19)", "location": "Wanzhou, China", "date": "-", "R0 value": "1.64", "%CI values": "95% confidence interval: 1.16-2.40", "method": "-"}}]	2020-11-30
emurar4d	emurar4d	Severe acute respiratory syndrome-coronavirus 2 (SARS-CoV-2) is the most significant global health crisis of the 21(st) century. The aim of this study was to develop a model to estimate the effect of undocumented infections, seasonal infectivity, immunity, and non-pharmaceutical interventions (NPIs), such as social distancing, on the transmission, morbidity, and mortality of SARS-CoV-2 in New Yor…	Significant Relaxation of SARS-CoV-2-Targeted Non-Pharmaceutical Interventions Will Result in Profound Mortality: A New York State Modelling Study	1	disease name: Severe acute respiratory syndrome-coronavirus 2 (SARS-CoV-2) location: New York State (NYS) date: - R0 value: 5.7 %CI values: - method: -	[{"contribution":{"disease name": "Severe acute respiratory syndrome-coronavirus 2 (SARS-CoV-2)", "location": "New York State (NYS)", "date": "-", "R0 value": "5.7", "%CI values": "-", "method": "-"}}]	2020-05-14
uzbb6vyc	uzbb6vyc	Following the detection of the new coronavirus1 severe acute respiratory syndrome coronavirus 2 (SARS-CoV-2) and its spread outside of China, Europe has experienced large epidemics of coronavirus disease 2019 (COVID-19). In response, many European countries have implemented non-pharmaceutical interventions, such as the closure of schools and national lockdowns. Here we study the effect of major i…	Estimating the effects of non-pharmaceutical interventions on COVID-19 in Europe	-1	unanswerable	unanswerable	2020
36fbcobw	0y4dttsz	The aim of this study was to estimate the basic reproduction number (R0) of COVID-19 in the early stage of the epidemic and predict the expected number of new cases in Shahroud in Northeastern Iran. The R0 of COVID-19 was estimated using the serial interval distribution and the number of incidence cases. The 30-day probable incidence and cumulative incidence were predicted using the assumption th…	The basic reproduction number and prediction of the epidemic size of the novel coronavirus (COVID-19) in Shahroud, Iran	1	disease name: COVID-19 location: Shahroud in Northeastern Iran date: early 14 days R0 value: 2.7 %CI values: 95% confidence interval (CI): 2.1-3.4 method: the serial interval distribution and the number of incidence cases | disease name: COVID-19 location: Shahroud in Northeastern Iran date: by the end of day 42. R0 value: 1.13 %CI values: 95% CI 1.03-1.25 method: the serial interval distribution…	[{"contribution":{"disease name": "COVID-19", "location": "Shahroud in Northeastern Iran", "date": "early 14 days", "R0 value": "2.7", "%CI values": "95% confidence interval (CI): 2.1-3.4", "method": "the serial interval distribution and the number of incidence cases"}},{"contribution":{"disease name": "COVID-19", "location": "Shahroud in Northeastern Iran", "date": "by the end of day 42.", "R0 v…	2020	change_main_cord_id	165
c8vr9gk7	c8vr9gk7	Spain is among the countries worst hit by the Covid-19 pandemic, with one of the highest rate of infections and deaths per million inhabitants. First positive was reported on late January 2020. Mid March, with 7000 confirmed cases, nationwide lockdown was imposed. Mid May the epidemic was stabilized and government eased measures. Here we model the dynamics of the epidemic in Spain over the whole …	The Covid-19 outbreak in Spain. A simple dynamics model, some lessons, and a theoretical framework for control response	1	disease name: Covid-19 location: Spain date: over the whole span R0 value: 2.5 %CI values: 95% CI 2.3-2.7 method: (SIR) model | disease name: Covid-19 location: Germany date: over the whole span R0 value: - %CI values: - method: (SIR) model | disease name: Covid-19 location: Italy date: over the whole span R0 value: - %CI values: - method: (SIR) model	[{"contribution":{"disease name": "Covid-19", "location": "Spain", "date": "over the whole span", "R0 value": "2.5", "%CI values": "95% CI 2.3-2.7", "method": "(SIR) model"}},{"contribution":{"disease name": "Covid-19", "location": "Germany", "date": "over the whole span", "R0 value": "-", "%CI values": "-", "method": "(SIR) model"}},{"contribution":{"disease name": "Covid-19", "location": "Italy…	2020		359
pu5czpyz	pu5czpyz	Reemergent local outbreaks of coronavirus disease 2019 (COVID-19) have occurred in China, yet few Chinese response strategies and its evaluation have been reported. This study presents a preliminary assessment of Chinese strategy in controlling reemergent local outbreaks of COVID-19. Time course of accumulative and daily new cases and time-varying reproductive numbers (Rt) of outbreak areas were …	Preliminary Assessment of Chinese Strategy in Controlling Reemergent Local Outbreak of COVID-19	-1	unanswerable	unanswerable	2021-07-02 10:00:00
w5d7ho1m	w5d7ho1m	This work aims to model, simulate and provide insights into the dynamics and control of COVID-19 infection rates. Using an established epidemiological model augmented with a time-varying disease transmission rate allows daily model calibration using COVID-19 case data from countries around the world. This hybrid model provides predictive forecasts of the cumulative number of infected cases. It al…	Insights into the dynamics and control of COVID-19 infection rates	0	disease name: COVID-19 location: countries around the world date: - R0 value: - %CI values: - method: established epidemiological model augmented with a time-varying disease transmission rate	[{"contribution":{"disease name": "COVID-19", "location": "countries around the world", "date": "-", "R0 value": "-", "%CI values": "-", "method": "established epidemiological model augmented with a time-varying disease transmission rate"}}]	2020
j852fh90	j852fh90	Most countries around the world are battling to limit the spread of severe acute respiratory syndrome-coronavirus 2 (SARS-CoV-2). As the world strives to get an effective medication to control the disease, appropriate control measures for now remains one of the effective measures to reduce the spread of the disease. In this study, a fractional optimal control model is formulated in Atangana-Balea…	Fractional optimal control dynamics of coronavirus model with MittagÃ¢â‚¬â€œLeffler law	-1	unanswerable	unanswerable	2021-01-31 05:00:00
62b5yddl	62b5yddl	The spread of SARS-CoV-2 created a pandemic crisis with > 150,000 cumulative cases in > 65 countries within a few months. The reproductive number (R) is a metric to estimate the transmission of a pathogen during an outbreak. Preliminary published estimates were based on the initial outbreak in China. Whole genome sequences (WGS) analysis found mutational variations in the viral genome; however, p…	Analysis of SARS-CoV-2 genomic epidemiology reveals disease transmission coupled to variant emergence and allelic variation	-1	unanswerable	unanswerable	2021
vm8bq4eo	vm8bq4eo	This paper provides estimates of COVID-19 effective reproduction numbers worldwide and explains their evolution for selected European countries since the start of the pandemic, taking account of changes in voluntary and government-mandated social distancing, incentives to comply, vaccination and the emergence of mutations. Evidence based on panel data modeling indicates that the diversity of outc…	Social Distancing, Vaccination and Evolution of Covid-19 Transmission Rates in Europe (preprint)/ en	-1	unanswerable	unanswerable	-
kjbflli1	kjbflli1	The 2005 dengue outbreak in Singapore cumulated in > 14,000 cases and 27 reported dengue deaths. We fit the single-phase Richards model to weekly dengue notification numbers to detect the turning point for the outbreak, which enables us to study the impact of intervention measures relating to the turning point. The results indicate that turning point had most likely occurred in late August or ear…	Intervention measures, turning point, and reproduction number for dengue, Singapore, 2005.	1	disease name: Dengue location: Singapore date: - R0 value: 1.89-2.23 %CI values: (95% confidence interval: 1.15-3.00) method: single-phase Richards model	[{"contribution":{"disease name": "Dengue", "location": "Singapore", "date": "-", "R0 value": "1.89-2.23", "%CI values": "(95% confidence interval: 1.15-3.00)", "method": "single-phase Richards model"}}]	2009
8tg17wm3	8tg17wm3	The fast-spreading Omicron variant of SARS-CoV-2 overwhelmed Hong Kong, causing the fifth wave of COVID-19. It remains to be determined what mitigation measures might have played a role in reversing the rising trend of confirmed cases in this major outbreak. The government of Hong Kong has launched the mass rapid antigen tests (RAT) in the population and the StayHomeSafe scheme since February 202…	Understanding the impact of rapid antigen tests on SARS-CoV-2 transmission in the fifth wave of COVID-19 in Hong Kong in early 2022	-1	unanswerable	unanswerable	2022-05-23 10:00:00
weaoecu3	weaoecu3	The outbreak of the novel coronavirus, COVID-19, has been declared a pandemic by the WHO. The structures of social contact critically determine the spread of the infection and, in the absence of vaccines, the control of these structures through large-scale social distancing measures appears to be the most effective means of mitigation. Here we use an age-structured SIR model with social contact m…	Age-structured impact of social distancing on the COVID-19 epidemic in India	0	disease name: COVID-19 location: India date: - R0 value: - %CI values: - method: age-structured SIR model with social contact matrices obtained from surveys and Bayesian imputation	[{"contribution":{"disease name": "COVID-19", "location": "India", "date": "-", "R0 value": "-", "%CI values": "-", "method": "age-structured SIR model with social contact matrices obtained from surveys and Bayesian imputation"}}]	2020
13tpjcms	13tpjcms	Background: Various mathematical modeling approaches are used to provide a robust framework for understanding the transmission dynamics of infectious diseases in human populations. In an epidemic, models can be used for the analysis of the spread of a disease, forecasting, identifying trends and making parameter estimates which can be used for planning and implementing intervention measures. Meth…	Simulation of the Third Wave of COVID 19 Infections in Zambia using the SIR Model (preprint)/ en	1	disease name: COVID-19 location: Zambia date: for the third wave of the pandemic obtained from the Zambia National Public Health Institute (ZNPHI) R0 value: 1.31 %CI values: - method: classical Susceptible - Infected - Recovered (SIR) model	[{"contribution":{"disease name": "COVID-19", "location": "Zambia", "date": "for the third wave of the pandemic obtained from the Zambia National Public Health Institute (ZNPHI)", "R0 value": "1.31", "%CI values": "-", "method": "classical Susceptible - Infected - Recovered (SIR) model"}}]	-
5dd89gnm	5dd89gnm	Since December 8, 2019, the spread of COVID-19 is increasing every day. It is particularly important to predict the trend of the epidemic for the timely adjustment of the economy and industries. We proposed a Flow-SEHIR model in this paper, based on which we further analyzed the trends of 2019-nCoV (COVID-19) in China. The results show that the basic reproductive numbers R0 of COVID-19 is 3.56 (9…	Assessing the Tendency of 2019-nCoV (COVID-19) Outbreak in China	1	disease name: COVID-19 location: China date: Since December 8, 2019 R0 value: 3.56 %CI values: 95% CI: 2.31-4.81 method: Flow-SEHIR model	[{"contribution":{"disease name": "COVID-19", "location": "China", "date": "Since December 8, 2019", "R0 value": "3.56", "%CI values": "95% CI: 2.31-4.81", "method": "Flow-SEHIR model"}}]	2020-02-11
f6owfp5t	f6owfp5t	Epidemic models play a key role in understanding and responding to the emerging COVID-19 pandemic. Widely used compartmental models are static and are of limited use to evaluate intervention strategies with the emerging pandemic. Applying the technology of data assimilation, we propose a Bayesian updating approach for estimating epidemiological parameters using observable information for the purp…	A Bayesian Updating Scheme for Pandemics: Estimating the Infection Dynamics of COVID-19	-1	unanswerable	unanswerable	2020
zz293iy5	zz293iy5	In this paper, we propose a four compartmental model to understand the dynamics of infectious disease COVID-19. We show the boundedness and non-negativity of solutions of the model. We analytically calculate the basic reproduction number of the model and perform the stability analysis at the equilibrium points to understand the epidemic and endemic cases based on the basic reproduction number. Ou…	Modeling the dispersal effect to reduce the infection of COVID-19 in Bangladesh	0	disease name: COVID-19 location: - date: - R0 value: - %CI values: - method: a four compartmental model	[{"contribution":{"disease name": "COVID-19", "location": "-", "date": "-", "R0 value": "-", "%CI values": "-", "method": "a four compartmental model"}}]	2020-09-28 10:00:00
4sxsyr6k	4sxsyr6k	Background In order to slow down the spread of SARS-CoV-2, the virus causing the COVID-19 pandemic, the UK government has imposed strict physical distancing (lockdown) measures including school 'dismissals' since 23 March 2020. As evidence is emerging that these measures may have slowed the spread of the pandemic, it is important to assess the impact of any changes in strategy, including scenario…	Determining the optimal strategy for reopening schools, work and society in the UK: balancing earlier opening and the impact of test and trace strategies with the risk of occurrence of a secondary COVID-19 pandemic wave	-1	unanswerable	unanswerable	2020-06-01 10:00:00
6w1zqbax	6w1zqbax	The Coronavirus Disease 2019 (COVID-19) has fast spread to over 200 countries and regions worldwide since its outbreak, while in March, Europe became the emerging epicentre. In this study, we aimed to model the epidemic trends and estimate the essential epidemic features of COVID-19 in Italy, Spain, Germany, and France at the initial stage. The numbers of daily confirmed cases and total confirmed…	Modelling the initial epidemic trends of COVID-19 in Italy, Spain, Germany, and France	1	disease name: Coronavirus Disease 2019 (COVID-19) location: Italy date: - R0 value: 3.44 %CI values: 3.35-3.54 method: extended Susceptible-Exposed-Infectious-Removed (SEIR) model | disease name: Coronavirus Disease 2019 (COVID-19) location: Spain date: - R0 value: 6.25 %CI values: 5.97-6.55 method: extended Susceptible-Exposed-Infectious-Removed (SEIR) model | disease name: Coronavirus Disease 2…	[{"contribution":{"disease name": "Coronavirus Disease 2019 (COVID-19)", "location": "Italy", "date": "-", "R0 value": "3.44", "%CI values": "3.35-3.54", "method": "extended Susceptible-Exposed-Infectious-Removed (SEIR) model"}},{"contribution":{"disease name": "Coronavirus Disease 2019 (COVID-19)", "location": "Spain", "date": "-", "R0 value": "6.25", "%CI values": "5.97-6.55", "method": "extend…	2020		1425
6pb0lpyc	6pb0lpyc	In this work, we estimate the total number of infected and deaths by COVID-19 in Brazil and two Brazilian States (Rio de Janeiro and Sao Paulo). To obtain the unknown data, we use an iterative method in the Gompertz model, whose formulation is well known in the field of biology. Based on data collected from the Ministry of Health from February 26, 2020, to July 2, 2020, we predict, from July 3 to…	Predicting the number of total COVID-19 cases and deaths in Brazil by the Gompertz model	1	disease name: COVID-19 location: Brazil date: February 26, 2020, to July 2, 2020 R0 value: 1.3 %CI values: - method: iterative method in the Gompertz model | disease name: COVID-19 location: Sao Paulo date: February 26, 2020, to July 2, 2020 R0 value: 1.3 %CI values: - method: iterative method in the Gompertz model | disease name: COVID-19 location: Rio de Janeiro date: February 26, 2020, to July…	[{"contribution":{"disease name": "COVID-19", "location": "Brazil", "date": "February 26, 2020, to July 2, 2020", "R0 value": "1.3", "%CI values": "-", "method": "iterative method in the Gompertz model"}},{"contribution":{"disease name": "COVID-19", "location": "Sao Paulo", "date": "February 26, 2020, to July 2, 2020", "R0 value": "1.3", "%CI values": "-", "method": "iterative method in the Gompe…	2020		176
jep80bed	jep80bed	Coronaviruses of humans were first identified more than 60 years ago from individuals with respiratory infections, mainly mild. Two different viruses, 229E and OC43 were initially recognized. Because of difficulty in isolating them using standard techniques, many of the early studies of their occurrence were seroepidemiologic. They were confirmed to be worldwide in distribution, and, in the North…	Coronaviruses	-1	unanswerable	unanswerable	2014-02-27
7ws2kleo	7ws2kleo	Since the appearance of the first case of COVID-19 in Morocco on March, 02,2020, the cumulative number of reported infectious cases continues to increase and, up to date, the peak-time of infection is not reached yet. In this study, we propose a Susceptible-Asymptomatic-Infectious deterministic model to evaluate the impact of compulsory containment imposed in Morocco on March, 21 on the spread of…	Impact assessment of containment measure against COVID-19 spread in Morocco	1	disease name: COVID-19 location: Morocco date: - R0 value: 2.9949 %CI values: - method: Susceptible-Asymptomatic-Infectious deterministic model	[{"contribution":{"disease name": "COVID-19", "location": "Morocco", "date": "-", "R0 value": "2.9949", "%CI values": "-", "method": "Susceptible-Asymptomatic-Infectious deterministic model"}}]	2020-08-22 10:00:00
z16o1tps	z16o1tps	Given the worldwide pandemic of the novel coronavirus disease 2019 (COVID-19) and its continuing threat brought by the emergence of virus variants, there are great demands for accurate surveillance and monitoring of outbreaks. A valuable metric for assessing the current risk posed by an outbreak is the time-varying reproduction number ((Formula presented.)). Several methods have been proposed to …	Local Surveillance of the COVID-19 Outbreak	-1	unanswerable	unanswerable	2022
tu9l6fue	tu9l6fue	How does one interpret the observed increase or decrease in COVID19 case rates? Did the compliance to the non pharmaceutical interventions, seasonal changes in the temperature influence the transmission rates or are they purely an artefact of the number of tests? To answer these questions, we estimate the effect sizes from these different factors on the reproduction ratios (Rt) from the different…	Estimating Effect-sizes to Infer if COVID-19 transmission rates were low because of Masks, Heat or High because of Air-conditioners, Tests	-1	unanswerable	unanswerable	2021-01-20 05:00:00
fcng6yov	fcng6yov	Background: The third wave of COVID-19 in England peaked in January 2022 resulting from the rapid transmission of the Omicron variant. However, rates of hospitalisations and deaths were substantially lower than in the first and second waves Methods: In the REal-time Assessment of Community Transmission-1 (REACT-1) study we obtained data from a random sample of 94,950 participants with valid throa…	The Omicron SARS-CoV-2 epidemic in England during February 2022	1	disease name: SARS-CoV-2 location: England date: 8 February to 1 March 2022 R0 value: 0.94 (0.91-0.96) %CI values: - method: -	[{"contribution":{"disease name": "SARS-CoV-2", "location": "England", "date": "8 February to 1 March 2022", "R0 value": "0.94 (0.91-0.96)", "%CI values": "-", "method": "-"}}]	2022-03-13 05:00:00
guc9d605	guc9d605	INTRODUCTION: Italy became the second epicenter of the novel coronavirus disease 2019 (COVID-19) pandemic after China, surpassing by far China's death toll. The disease swept through Lombardy, which remained in lockdown for about two months, starting from the 8th of March. As of that day, the isolation measures taken in Lombardy were extended to the entire country. Here, assuming that effectively…	Tracing day-zero and forecasting the COVID-19 outbreak in Lombardy, Italy: A compartmental modelling and numerical optimization approach	1	disease name: COVID-19 location: Lombardy, Italy date: March 20 and March 21, 2020 R0 value: 4.53 %CI values: min-max range: 4.40- 4.65 method: modified compartmental Susceptible/ Exposed/ Infectious Asymptomatic/ Infected Symptomatic/ Recovered/ Dead (SEIIRD) model	[{"contribution":{"disease name": "COVID-19", "location": "Lombardy, Italy", "date": "March 20 and March 21, 2020", "R0 value": "4.53", "%CI values": "min-max range: 4.40- 4.65", "method": "modified compartmental Susceptible/ Exposed/ Infectious Asymptomatic/ Infected Symptomatic/ Recovered/ Dead (SEIIRD) model"}}]	2020
isg4hklm	isg4hklm	INTRODUCTION: The COVID-19 global pandemic has likely led to changes in physical activity as behavioral patterns were disrupted. This is important because sleep and physical activity are interrelated and promote health, and well-being. This study examined whether changes to physical activity were related to changes to sleep health as a result of the COVID-19 pandemic. METHODS: A sample of N=419 U…	204 Changes in Physical Activity During the COVID-19 Pandemic Associated with Changes in Sleep	-1	unanswerable	unanswerable	2021-05-03 10:00:00
k78iemm8	k78iemm8	The state of Kuwait is facing a substantial challenge in responding to the spread of the novel coronavirus 2019 (COVID-19). The government's decision to repatriate stranded citizens back to Kuwait from various COVID-19 epicenters has generated a great concern. It has heightened the need for prediction models to estimate the epidemic size. Mathematical modeling plays a pivotal role in predicting t…	Forecasting the spread of COVID-19 in kuwait using compartmental and logistic regression models	1	disease name: COVID-19 location: Kuwait date: until 19 April 2020 and before the repatriation plan R0 value: 2.2 %CI values: - method: Deterministic and stochastic modeling	[{"contribution":{"disease name": "COVID-19", "location": "Kuwait", "date": "until 19 April 2020 and before the repatriation plan", "R0 value": "2.2", "%CI values": "-", "method": "Deterministic and stochastic modeling"}}]	2020
aqyqofe7	aqyqofe7	Stochastic transmission dynamic models are especially useful for studying the early emergence of novel pathogens given the importance of chance events when the number of infectious individuals is small. However, methods for parameter estimation and prediction for these types of stochastic models remain limited. In this manuscript, we describe a calibration and prediction framework for stochastic …	A Likelihood Approach for Real-Time Calibration of Stochastic Compartmental Epidemic Models	-1	unanswerable	unanswerable	2017-01-17
qrm25ia3	qrm25ia3	BACKGROUND: The new coronavirus disease COVID-19 began in December 2019 and has spread rapidly by human-to-human transmission. This study evaluated the transmissibility of the infectious disease and analyzed its association with temperature and humidity to study the propagation pattern of COVID-19. METHODS: In this study, we revised the reported data in Wuhan based on several assumptions to estim…	Transmissibility of COVID-19 in 11 major cities in China and its association with temperature and humidity in Beijing, Shanghai, Guangzhou, and Chengdu	1	disease name: new coronavirus disease COVID-19 location: Wuhan date: January 24, 2020 to February 13, 2020 R0 value: 2.7 %CI values: - method: equation derived from the Susceptible-Exposed-Infectious-Recovered (SEIR) model | disease name: new coronavirus disease COVID-19 location: other cities,china date: January 24, 2020 to February 13, 2020 R0 value: ranging from 1.8 to 2.4 %CI values: - method…	[{"contribution":{"disease name": "new coronavirus disease COVID-19", "location": "Wuhan", "date": "January 24, 2020 to February 13, 2020", "R0 value": "2.7", "%CI values": "-", "method": "equation derived from the Susceptible-Exposed-Infectious-Recovered (SEIR) model"}},{"contribution":{"disease name": "new coronavirus disease COVID-19", "location": "other cities,china", "date": "January 24, 202…	2020-07-10		1413
13u8pms3	13u8pms3	We estimate the basic reproductive number and case counts for 15 distinct SARS-CoV-2 outbreaks, distributed across 10 countries and one cruise ship, based solely on phylodynamic analyses of genomic data. Our results indicate that, prior to significant public health interventions, the reproductive numbers for a majority (10) of these outbreaks are similar, with median posterior estimates ranging b…	Estimates of outbreak-specific SARS-CoV-2 epidemiological parameters from genomic data	1	disease name: SARS-CoV-2 location: 10 countries and one cruise ship date: - R0 value: 1.4 and 2.8 %CI values: - method: phylodynamic analyses of genomic data	[{"contribution":{"disease name": "SARS-CoV-2", "location": "10 countries and one cruise ship", "date": "-", "R0 value": "1.4 and 2.8", "%CI values": "-", "method": "phylodynamic analyses of genomic data"}}]	2020-09-14 10:00:00
6sotuqxs	6sotuqxs	Coronavirus disease 2019 (COVID-19) is a contagious disease caused by severe acute respiratory syndrome coronavirus 2 (SARS-CoV-2). This disease has spread globally, causing more than 161.5 million cases and 3.3 million deaths to date. Surveillance and monitoring of new mutations in the virusÃ¢â‚¬â„¢ genome are crucial to our understanding of the adaptation of SARS-CoV-2. Moreover, how the tempor…	Dynamics of SARS-CoV-2 mutations reveals regional-specificity and similar trends of N501 and high-frequency mutation N501Y in different levels of control measures	-1	unanswerable	unanswerable	2021-09-07 10:00:00
355guih4	debcgzrg	{\bf Abstract.} \\ {\bf Background:} Bangladesh hosts more than 800,000 Rohingya refugees from Myanmar. The low health immunity, lifestyle, access to good healthcare services, social-security cause this population to be at risk of far more direct effects of COVID-19 than the host population. Therefore, evidence-based forecasting of the COVID-19 burden is vital in this regard. In this study, we ai…	SARS-CoV-2 and Rohingya Refugee Camp, Bangladesh: Uncertainty and How the Government Took Over the Situation	1	disease name: COVID-19 location: Rohingya Refugee Camp, Bangladesh date: - R0 value: 0.7563 %CI values: - method: modified Susceptible-Exposed-Infectious Recovered (SEIR) transmission model	[{"contribution":{"disease name": "COVID-19", "location": "Rohingya Refugee Camp, Bangladesh", "date": "-", "R0 value": "0.7563", "%CI values": "-", "method": "modified Susceptible-Exposed-Infectious Recovered (SEIR) transmission model"}}]	2020	change_main_cord_id	1506
bwvtcrno	bwvtcrno	Background: Households appear to be the highest risk setting for transmission of COVID-19. Large household transmission studies were reported in the early stages of the pandemic in Asia with secondary attack rates ranging from 5-30% but few large scale household transmission studies have been conducted outside of Asia. Methods: A prospective case ascertained study design based on the World Health…	Transmission dynamics of COVID-19 in household and community settings in the United Kingdom	1	disease name: COVID-19 location: United Kingdom date: Late January 2020 R0 value: 1.85 and a household reproduction number of 2.33 %CI values: - method: prospective case ascertained study design based on the World Health Organization FFX protocol	[{"contribution":{"disease name": "COVID-19", "location": "United Kingdom", "date": "Late January 2020", "R0 value": "1.85 and a household reproduction number of 2.33", "%CI values": "-", "method": "prospective case ascertained study design based on the World Health Organization FFX protocol"}}]	2020-08-22
5grstp0p	5grstp0p	Between March 5th and July 25th, 2020, the total number of SARS-CoV-2 confirmed cases in Bosnia and Herzegovina (BH) was 10,090, corresponding to a cumulative incidence rate of 285.7/100,000 population. Demographic and clinical information on all the cases along with exposure and contact information were collected using a standardized case report form. In suspected SARS-CoV-2 cases, respiratory s…	SARS-CoV-2 virus outbreak and the emergency public health measures in Bosnia and Herzegovina: January - July, 2020	-1	unanswerable	unanswerable	2020
l82zkd0n	l82zkd0n	This review is aimed at evaluating whether radiation therapy (RT) can be omitted in older adult early-stage low-risk breast cancer (BC) patients. The published data are particularly relevant at present, during the COVID-19 pandemic emergency, to define a treatment strategy and to prioritize essential therapy. Cochrane Database of Systematic Reviews and PubMED were systematically researched from o…	Omission of adjuvant radiotherapy for older adults with early-stage breast cancer particularly in the COVID era: A literature review (on the behalf of Italian Association of Radiotherapy and Clinical Oncology)	-1	unanswerable	unanswerable	2021
t056gze6	t056gze6	In this paper, we develop a mathematical model for the spread and control of the coronavirus disease. An outbreak of COVID-19 has led to more than one million confirmed cases as of April 3rd, 2020. Understanding the early spread dynamics of the infection and evaluating the effectiveness of control measures is crucial for assessing the potential for sustained transmission to occur in new areas. Co…	Mathematical modelling on diffusion and control of COVID-19	1	disease name: COVID-19 location: within and outside of Wuhan, China date: January and February 2020 (one week before travel restrictions on Jan 23rd) R0 value: 2·45 %CI values: (95% CI: 1·16-4·87) method: SEIR framework model | disease name: COVID-19 location: within and outside of Wuhan, China date: January and February 2020 (one week after travel restrictions on Jan 23rd) R0 value: 1.05 %CI val…	[{"contribution":{"disease name": "COVID-19", "location": "within and outside of Wuhan, China", "date": "January and February 2020 (one week before travel restrictions on Jan 23rd)", "R0 value": "2·45", "%CI values": "(95% CI: 1·16-4·87)", "method": "SEIR framework model"}},{"contribution":{"disease name": "COVID-19", "location": "within and outside of Wuhan, China", "date": "January and February…	2020		275
eemk2z4v	eemk2z4v	Healthcare-associated infections (HAIs) remain a public health problem. Previous work showed intensive care unit (ICU) population structure impacts methicillin-resistant Staphylococcus aureus (MRSA) rates. Unexplored in that work was the transient dynamics of this system. We consider the dynamics of MRSA in an ICU in three different models: 1) a Ross-McDonald model with a single healthcare staff …	Transient Dynamics of Infection Transmission in a Simulated Intensive Care Unit	1	disease name: methicillin-resistant Staphylococcus aureus (MRSA) location: Intensive Care Unit (ICU) date: - R0 value: 0.337 %CI values: - method: Next Generation Matrix method (single-staff model) | disease name: methicillin-resistant Staphylococcus aureus (MRSA) location: Intensive Care Unit (ICU) date: - R0 value: 0.278 %CI values: - method: Next Generation Matrix method (other two models)	[{"contribution":{"disease name": "methicillin-resistant Staphylococcus aureus (MRSA)", "location": "Intensive Care Unit (ICU)", "date": "-", "R0 value": "0.337", "%CI values": "-", "method": "Next Generation Matrix method (single-staff model)"}},{"contribution":{"disease name": "methicillin-resistant Staphylococcus aureus (MRSA)", "location": "Intensive Care Unit (ICU)", "date": "-", "R0 value":…	2019-09-26 10:00:00		529
2gt15im7	2gt15im7	A simplified method to compute $R_t$, the Effective Reproduction Number, is presented. The method relates the value of $R_t$ to the estimation of the doubling time performed with a local exponential fit. The condition $R_t = 1$ corresponds to a growth rate equal to zero or equivalently an infinite doubling time. Different assumptions on the probability distribution of the generation time are cons…	A simplified estimate of the Effective Reproduction Number $R_t$ using its relation with the doubling time and application to Italian COVID-19 data	-1	unanswerable	unanswerable	2021
e23pdtfn	e23pdtfn	INTRODUCTION: During the COVID-19 pandemic, individuals have faced unprecedented events, which are often stressful. Stress has an important impact on dreams, and stress-induced sleep difficulties may also impact dream recall. The present study evaluated associations between sleep, stress and dream content on dream recall during the pandemic. METHODS: A sample of N=419 US adults completed online s…	210 Changes in Dream Recall During the COVID-19 Pandemic: Associations with Sleep, Stress and Dream Content	-1	unanswerable	unanswerable	2021-05-03 10:00:00
4tuxmhco	4tuxmhco	BACKGROUND: Recent reports have suggested that among individuals previously infected with SARS-CoV-2, a single mRNA vaccine dose is sufficient to elicit high levels of immunity. METHODS: We compared anti-SARS-CoV-2 spike receptor binding domain (RBD) IgG antibody concentrations and antibody-mediated neutralization of spike-angiotensin-converting enzyme (ACE2) receptor binding in vitro following v…	Comparison of IgG and neutralizing antibody responses after one or two doses of COVID-19 mRNA vaccine in previously infected and uninfected individuals.	-1	unanswerable	unanswerable	2021-07-13 10:00:00
fg1t15vi	fg1t15vi	The emerging virus, COVID-19, has caused a massive outbreak worldwide. Based on the publicly available contact-tracing data, we identified 509 transmission chains from 20 provinces in China and estimated the serial interval (SI) and generation interval (GI) of COVID-19 in China. Inspired by different possible values of the time-varying reproduction number for the imported cases and the local case…	Serial Interval and Generation Interval for Imported and Local Infectors, Respectively, Estimated Using Reported Contact-Tracing Data of COVID-19 in China	-1	unanswerable	unanswerable	2020
ii0ceksc	ii0ceksc	The Omicron variant is the most transmissible variant of the severe acute respiratory syndrome coronavirus 2 (SARS-CoV-2) we had so far. The BA.1 and BA.2 sublineages of Omicron are circulating in Europe and it is urgent to evaluate the transmissibility of these sub-lineages. Using a mathematical model describing trajectories of variant frequencies that assumes a constant ratio in generation time…	Estimating relative generation times and relative reproduction numbers of Omicron BA.1 and BA.2 with respect to Delta in Denmark	-1	unanswerable	unanswerable	2022-03-04 05:00:00
lpdvpg1y	lpdvpg1y	BACKGROUND: Nosocomial outbreaks of severe acute respiratory syndrome coronavirus 2 (SARS-CoV-2) are frequent despite implementation of conventional infection control measures. We performed an outbreak investigation using advanced genomic and statistical techniques to reconstruct likely transmission chains and assess the role of healthcare workers (HCWs) in SARS-CoV-2 transmission. METHODS: We in…	Explosive nosocomial outbreak of SARS-CoV-2 in a rehabilitation clinic: the limits of genomics for outbreak reconstruction	-1	unanswerable	unanswerable	2021-08-27 10:00:00
x7jfgb8f	x7jfgb8f	AIM: To estimate the epidemiological parameters related to the Covid-19 outbreak in Iran. BACKGROUND: Estimating the epidemiological parameters of new public health threat (COVID-19) is essential to support and inform public health decision-making in different communities including Iran. METHODS: We established a mathematical model to estimate the epidemiological parameters from 19 Feb to 15 Marc…	Early estimation of the epidemiological parameters of novel coronavirus disease (COVID-2019) outbreak in Iran: 19 Feb-15 March, 2020	1	disease name: COVID-19 location: Iran date: 19 Feb-15 March, 2020 R0 value: 2.11 %CI values: (95% CI, 1.87-2.50) method: mathematical model	[{"contribution":{"disease name": "COVID-19", "location": "Iran", "date": "19 Feb-15 March, 2020", "R0 value": "2.11", "%CI values": "(95% CI, 1.87-2.50)", "method": "mathematical model"}}]	2020
2n7ojlf6	2n7ojlf6	Importance: Taiwan is one of the few countries with initial success in COVID-19 control without strict lockdown or school closure. The reasons remain to be fully elucidated. Objective: To compare and evaluate the effectiveness of case-based (including contact tracing and quarantine) and population-based (including social distancing and facial masking) interventions for COVID-19 in Taiwan. Design,…	Comparison of Estimated Effectiveness of Case-Based and Population-Based Interventions on COVID-19 Containment in Taiwan	1	disease name: COVID-19 location: Taiwan date: 253 days between April and December 2020 R0 value: voluntary population-based interventions, if used alone, were estimated to have reduced the reproduction number to 1.30 %CI values: 95% CrI, 1.03-1.58 method: stochastic branching process model	[{"contribution":{"disease name": "COVID-19", "location": "Taiwan", "date": "253 days between April and December 2020", "R0 value": "voluntary population-based interventions, if used alone, were estimated to have reduced the reproduction number to 1.30", "%CI values": "95% CrI, 1.03-1.58", "method": "stochastic branching process model"}}]	2021
vw5yjxmc	vw5yjxmc	Importance. Incarcerated individuals are a vulnerable population for severe acute respiratory syndrome coronavirus 2 (SARS-CoV-2) infection. Understanding SARS-CoV-2 dynamics in prisons is crucial for curbing transmission both within correctional facilities and in the surrounding community. Objective. The purpose of this study was to identify transmission scenarios that could underly rapid, wides…	COVID-19 dynamics in an Ohio prison	1	disease name: SARS-CoV-2 location: Ohio prison date: - R0 value: 14 and 3 %CI values: - method: -	[{"contribution":{"disease name": "SARS-CoV-2", "location": "Ohio prison", "date": "-", "R0 value": "14 and 3", "%CI values": "-", "method": "-"}}]	44211.2
n8rikeh8	n8rikeh8	Kuwait has been experiencing a COVID-19 outbreak since the first imported case on Feb 24, 2020. Analysis of data from the early stage of COVID-19 outbreak in Kuwait can provide important information about the potential epidemic and healthcare burdens as well as assist in evaluating the potential impact of various outbreak control measures. Such control measures are essentially implemented to achi…	Real-time tracking and forecasting of the of COVID-19 outbreak in Kuwait: a mathematical modeling study	0	disease name: COVID-19 location: Kuwait date: - R0 value: - %CI values: - method: maximum likelihood framework	[{"contribution":{"disease name": "COVID-19", "location": "Kuwait", "date": "-", "R0 value": "-", "%CI values": "-", "method": "maximum likelihood framework"}}]	2020-05-08 10:00:00
5aikaw84	5aikaw84	BACKGROUND: The pandemic coronavirus disease 2019 (COVID-19) has spread and caused enormous and serious damages to many countries worldwide. One of the most typical interventions is the social distancing such as lockdown that would contribute to reduce the number of contacts among undiagnosed individuals. However, prolongation of the period of such a restrictive intervention could hugely affect t…	Possible effects of mixed prevention strategy for COVID-19 epidemic: massive testing, quarantine and social distancing	-1	unanswerable	unanswerable	2020-07-06 10:00:00
dks24zau	dks24zau	Greece imposed a nationwide lockdown in March 2020 to mitigate transmission of severe acute respiratory syndrome coronavirus 2 during the first epidemic wave. We conducted a survey on age-specific social contact patterns to assess effects of physical distancing measures and used a susceptible-exposed-infectious-recovered model to simulate the epidemic. Because multiple distancing measures were im…	Effects of Social Distancing Measures during the First Epidemic Wave of Severe Acute Respiratory Syndrome Infection, Greece	1	disease name: severe acute respiratory syndrome coronavirus 2 location: Greece date: Before measures were implemented R0 value: 2.38 %CI values: (95% CI 2.01-2.80) method: susceptible-exposed-infectious-recovered model	[{"contribution":{"disease name": "severe acute respiratory syndrome coronavirus 2", "location": "Greece", "date": "Before measures were implemented", "R0 value": "2.38", "%CI values": "(95% CI 2.01-2.80)", "method": "susceptible-exposed-infectious-recovered model"}}]	2021
39ja79c6	39ja79c6	We develop an agent-based model to assess the cumulative number of deaths during hypothetical Covid-19-like epidemics for various non-pharmaceutical intervention strategies. The model simulates three interrelated stochastic processes: epidemic spreading, availability of respiratory ventilators and changes in death statistics. We consider local and non-local modes of disease transmission. The firs…	Modelling Excess Mortality in Covid-19-Like Epidemics	-1	unanswerable	unanswerable	2020
3dcbf1fh	3dcbf1fh	Epidemiology models with constant parameters may not capture the infection patterns in the presence of pharmaceutical and non-pharmaceutical mitigation measures during a pandemic, since infectiousness is a function of time. In this paper, Epidemiology Informed Neural Network (EINN) algorithms are introduced to discover time-varying infection rates for the COVID-19 pandemic. Since there are asympt…	Data-driven deep learning algorithms for time-varying infection rates of COVID-19 and mitigation measures	-1	unanswerable	unanswerable	2021
x05qoh09	x05qoh09	Importance: A significant proportion of COVID-19 transmission occurs silently during the presymptomatic and asymptomatic stages of infection. Children, although important drivers of silent transmission, are not included in the current COVID-19 vaccination campaigns. Objective: To estimate the benefits of identifying silent infections among children as a proxy for their vaccination. Design, Settin…	Simulated Identification of Silent COVID-19 Infections Among Children and Estimated Future Infection Rates With Vaccination	-1	unanswerable	unanswerable	2021
j1huk63f	j1huk63f	Each state in the United States exhibited a unique response to the COVID-19 outbreak, along with variable levels of testing, leading to different actual case burdens in the country. In this study, via per-capita testing dependent ascertainment rates, along with case and death data, we fit a minimal epidemic model for each state. We estimate infection-level responsive lockdown entry and exit rates…	Modeling COVID-19 outbreaks in United States with distinct testing, lockdown speed and fatigue rates	-1	unanswerable	unanswerable	2021-01-06 05:00:00
nlatfc7x	nlatfc7x	BackgroundHealthcare workers (HCWs) and ethnic minority groups are at increased risk of COVID-19 infection and adverse outcome. Severe acute respiratory syndrome coronavirus-2 (SARS-CoV-2) vaccination is now available for frontline UK HCWs; however, demographic/occupational associations with vaccine uptake in this cohort are unknown. We sought to establish these associations in a large UK hospita…	Association of demographic and occupational factors with SARS-CoV-2 vaccine uptake in a multi-ethnic UK healthcare workforce: a rapid real-world analysis	-1	unanswerable	unanswerable	2021-02-15 05:00:00
qrm25ia3	xsurzew3	Background: The new coronavirus disease COVID-19 outbroke in Wuhan, Hubei Province, China in December 2019, and has spread by human-to-human transmission to other areas. This study evaluated the transmissibility of the infectious disease and analyzed its association with temperature and humidity, in order to put forward suggestions on how to suppress the transmission. Methods: In this study, we r…	Transmissibility of COVID-19 and its association with temperature and humidity	1	disease name: new coronavirus disease COVID-19 location: Wuhan date: from January 24, 2020 to February 13, 2020 R0 value: 2.7011 %CI values: - method: Susceptibleâ€“Exposedâ€“Infectiousâ€“Recovered (SEIR) model | disease name: new coronavirus disease COVID-19 location: other cities,china date: from January 24, 2020 to February 13, 2020 R0 value: ranging from 1.7762 to 2.3700 %CI values: - method:…	[{"contribution":{"disease name": "new coronavirus disease COVID-19", "location": "Wuhan", "date": "from January 24, 2020 to February 13, 2020", "R0 value": "2.7011", "%CI values": "-", "method": "Susceptibleâ€“Exposedâ€“Infectiousâ€“Recovered (SEIR) model"}},{"contribution":{"disease name": "new coronavirus disease COVID-19", "location": "other cities,china", "date": "from January 24, 2020 to Fe…	2020	change_main_cord_id	1413
4zwn2bus	4zwn2bus	The rapidly spreading Covid-19 that affected almost all countries, was first reported at the end of 2019. As a consequence of its highly infectious nature, countries all over the world have imposed extremely strict measures to control its spread. Since the earliest stages of this major pandemic, academics have done a huge amount of research in order to understand the disease, develop medication, …	What Can We Estimate from Fatality and Infectious Case Data using the Susceptible-Infected-Removed (SIR) model? A case Study of Covid-19 Pandemic	0	disease name: Covid-19 location: ten countries date: anuary 22, 2020 - April 18, 2020 R0 value: - %CI values: - method: Susceptible-Infected-Removed (SIR) model	[{"contribution":{"disease name": "Covid-19", "location": "ten countries", "date": "anuary 22, 2020 - April 18, 2020", "R0 value": "-", "%CI values": "-", "method": "Susceptible-Infected-Removed (SIR) model"}}]	2020
68p1q0ye	68p1q0ye	BACKGROUND: Transmission of respiratory pathogens such as SARS-CoV-2 depends on patterns of contact and mixing across populations. Understanding this is crucial to predict pathogen spread and the effectiveness of control efforts. Most analyses of contact patterns to date have focused on high-income settings. METHODS: Here, we conduct a systematic review and individual-participant meta-analysis of…	Social contact patterns and implications for infectious disease transmission Ã¢â‚¬â€œ a systematic review and meta-analysis of contact surveys	-1	unanswerable	unanswerable	2021-11-25 05:00:00
l0c69uul	l0c69uul	In this work we propose a simple mathematical model for the analysis of the impact of control measures against an emerging infection, namely, the severe acute respiratory syndrome (SARS). The model provides a testable hypothesis by considering a dynamical equation for the contact parameter, which drops exponentially with time, simulating control measures. We discuss the role of modelling in publi…	Forecasting versus projection models in epidemiology: The case of the SARS epidemics	1	disease name: SARS location: Hong Kong date: - R0 value: 1.2 %CI values: - method: simple mathematical model | disease name: SARS location: Toronto (Canada) date: - R0 value: 1.32 %CI values: - method: simple mathematical model	[{"contribution":{"disease name": "SARS", "location": "Hong Kong", "date": "-", "R0 value": "1.2", "%CI values": "-", "method": "simple mathematical model"}},{"contribution":{"disease name": "SARS", "location": "Toronto (Canada)", "date": "-", "R0 value": "1.32", "%CI values": "-", "method": "simple mathematical model"}}]	2005-03-30 10:00:00		1224
xu33wkt3	xu33wkt3	Full genome sequences are increasingly used to track the geographic spread and transmission dynamics of viral pathogens. Here, with a focus on Israel, we sequence 212 SARS-CoV-2 sequences and use them to perform a comprehensive analysis to trace the origins and spread of the virus. We find that travelers returning from the United States of America significantly contributed to viral spread in Isra…	Full genome viral sequences inform patterns of SARS-CoV-2 spread into and within Israel	1	disease name: SARS-CoV-2 location: Israel date: - R0 value: initially around 2.5 %CI values: - method: phylodynamic analysis	[{"contribution":{"disease name": "SARS-CoV-2", "location": "Israel", "date": "-", "R0 value": "initially around 2.5", "%CI values": "-", "method": "phylodynamic analysis"}}]	2020
jmxdbngt	jmxdbngt	Despite having a small footprint origin, COVID-19 has expanded its clutches to being a global pandemic with severe consequences threatening the survival of the human species. Despite international communities closing their corridors to reduce the exponential spread of the coronavirus. The need to study the patterns of transmission and spread gains utmost importance at the grass-root level of the …	Accessing Covid19 Epidemic Outbreak in Tamilnadu and the Impact of Lockdown through Epidemiological Models and Dynamic systems	-1	unanswerable	unanswerable	2020
iokyu7ja	iokyu7ja	Transmission of SARS-CoV-2 appears especially effective in "hot zone" locations where individuals interact in close proximity. We present mathematical models describing two types of hot zones. First, we consider a metapopulation model of infection spread where transmission hot zones are explicitly described by independent demes in which the same people repeatedly interact (referred to as "static"…	Effect of hot zone infection outbreaks on the dynamics of SARS-CoV-2 spread in the community at large	-1	unanswerable	unanswerable	2020-11-24 05:00:00
n7gxgfhi	n7gxgfhi	The death toll for Covid-19 may be reduced by dividing the population into two classes, the vulnerable and the fit, with different lockdown regimes. Instead of one reproduction number there now are four parameters. These make it possible to quantify the effect of the social distancing measures. There is a simple stochastic model for epidemics in a two type population. Apart from the size of the p…	Shielding the vulnerable in an epidemic: a numerical approach	-1	unanswerable	unanswerable	2020
21hwmk1z	21hwmk1z	BACKGROUND: COVID-19 continues to threaten human life worldwide. We explored how human behaviours have been influenced by the COVID-19 pandemic in Hong Kong, and how the transmission of other respiratory diseases (e.g. influenza) has been influenced by human behaviour. METHODS: We focused on the spread of COVID-19 and influenza infections based on reported COVID-19 cases and influenza surveillanc…	Effects of human behaviour changes during the COVID-19 pandemic on influenza spread in Hong Kong	-1	unanswerable	unanswerable	2020
54x472tr	54x472tr	The pandemic of the severe acute respiratory syndrome coronavirus 2 (SARS-CoV-2) took the world by surprise. Following the first outbreak of COVID-19 in December 2019, several models have been developed to study and understand its transmission dynamics. Although the spread of COVID-19 is being slowed down by vaccination and other interventions, there is still a need to have a clear understanding …	The basic reproduction number of COVID-19 across Africa	1	disease name: COVID-19 location: Sudan date: - R0 value: 1.98 %CI values: - method: SEIR model and a Bayesian inference framework | disease name: COVID-19 location: Mauritius date: - R0 value: 9.66 %CI values: - method: SEIR model and a Bayesian inference framework | disease name: COVID-19 location: Africa date: - R0 value: a median of 3.67 %CI values: 90% CrI: 3.31 - 4.12 method: SEIR model and …	[{"contribution":{"disease name": "COVID-19", "location": "Sudan", "date": "-", "R0 value": "1.98", "%CI values": "-", "method": "SEIR model and a Bayesian inference framework"}},{"contribution":{"disease name": "COVID-19", "location": "Mauritius", "date": "-", "R0 value": "9.66", "%CI values": "-", "method": "SEIR model and a Bayesian inference framework"}},{"contribution":{"disease name": "COVI…	2021		1270
o8tus083	o8tus083	The correct evaluation of the reproductive number $R$ for COVID-19 -- which characterizes the average number of secondary cases generated by each typical primary case -- is central in the quantification of the potential scope of the pandemic and the selection of an appropriate course of action. In most models, $R$ is modeled as a universal constant for the virus across outbreak clusters and indiv…	Modeling the Heterogeneity in COVID-19's Reproductive Number and its Impact on Predictive Scenarios	-1	unanswerable	unanswerable	2021
kmdkbdoe	kmdkbdoe	Background: The outbreak of novel coronavirus disease (COVID-19), started from Wuhan, China, at the end of December 2019, hits almost the entire world. In Bangladesh, the first case was officially reported on March 8, 2020. We estimated the basic reproductive number, R 0 , of COVID-19 for Bangladesh using the first 65-day data of the outbreak.MethodsWith time-varying disease reporting rate, epide…	Estimation of the basic reproduction number of novel coronavirus (COVID-19) in Bangladesh: A 65-day outbreak data-driven analysis	1	disease name: novel coronavirus disease (COVID-19) location: Bangladesh date: March 8 to May 11, 2020 R0 value: 1.82 %CI values: 95% CI: 1.81-1.84 method: exponential growth model	[{"contribution":{"disease name": "novel coronavirus disease (COVID-19)", "location": "Bangladesh", "date": "March 8 to May 11, 2020", "R0 value": "1.82", "%CI values": "95% CI: 1.81-1.84", "method": "exponential growth model"}}]	2020
foxbu4ec	foxbu4ec	Policy makers around the world are facing unprecedented challenges in making decisions on when and what degrees of measures should be implemented to tackle the COVID-19 pandemic. Here, using a nationwide mobile phone dataset, we developed a networked meta-population model to simulate the impact of intervention in controlling the spread of the virus in China by varying the effectiveness of transmi…	Investigating time, strength, and duration of measures in controlling the spread of COVID-19 using a networked meta-population model	0	disease name: COVID-19 location: China date: - R0 value: - %CI values: - method: networked meta-population model	[{"contribution":{"disease name": "COVID-19", "location": "China", "date": "-", "R0 value": "-", "%CI values": "-", "method": "networked meta-population model"}}]	2020		562
6xc0w5iv	6xc0w5iv	We present a global analysis of the spread of recently emerged SARS-CoV-2 variants and estimate changes in effective reproduction numbers at country-specific level using sequence data from GISAID. Nearly all investigated countries demonstrated rapid replacement of previously circulating lineages by the World Health Organization-designated variants of concern, with estimated transmissibility incre…	Increased transmissibility and global spread of SARS-CoV-2 variants of concern as at June 2021	-1	unanswerable	unanswerable	2021
4wnp1u22	4wnp1u22	Background: World Health organization declared Covid-19 as an outbreak, hence preventive measure like lockdown should be taken to control the spread of infection. This study offers an exhaustive analysis of the reproductive number (R0) in India with major intervention for COVID-19 outbreaks and analysed the lockdown effects on the Covid-19. Methodology: Covid-19 data extracted from Ministry of He…	A comprehensive analysis of R0 with different lockdown phase during covid-19 in India	1	disease name: Covid-19 location: India date: June and July R0 value: 1.73 to 1.08 %CI values: - method: Novel method implemented in the incidence and Optimum function in desolve package to the data of cumulative daily new confirmed cases for robustly estimating the reproduction number in the R software.	[{"contribution":{"disease name": "Covid-19", "location": "India", "date": "June and July", "R0 value": "1.73 to 1.08", "%CI values": "-", "method": "Novel method implemented in the incidence and Optimum function in desolve package to the data of cumulative daily new confirmed cases for robustly estimating the reproduction number in the R software."}}]	2020-07-11 10:00:00
k5c0ptbk	k5c0ptbk	The SARS-CoV-2 B.1.617.2 (Delta) variant flared up in late May in Guangzhou, China. Transmission characteristics of Delta variant were analysed for 153 confirmed cases and two complete transmission chains with seven generations were fully presented. A rapid transmission occurred in five generations within 10 days. The basic reproduction number (R(0)) was 3.60 (95% confidence interval: 2.50Ã¢â‚¬â€…	Crucial control measures to contain China's first Delta variant outbreak	1	disease name: SARS-CoV-2 B.1.617.2 (Delta) variant location: Guangzhou, China date: late May R0 value: 3.6 %CI values: 95% confidence interval: 2.50-5.30 method: Transmission characteristics of Delta variant were analysed for 153 confirmed cases and two complete transmission chains with seven generations were fully presented.	[{"contribution":{"disease name": "SARS-CoV-2 B.1.617.2 (Delta) variant", "location": "Guangzhou, China", "date": "late May", "R0 value": "3.6", "%CI values": "95% confidence interval: 2.50-5.30", "method": "Transmission characteristics of Delta variant were analysed for 153 confirmed cases and two complete transmission chains with seven generations were fully presented."}}]	2022-01-18
z22ekgtv	z22ekgtv	BACKGROUND: Influenza A pandemics cause significant mortality and morbidity. H2N2 viruses have caused a prior pandemic, and are circulating in avian reservoirs. The age-related frequency of current population immunity to H2 viruses was evaluated. METHODS: Hemagglutinin inhibition (HAI) assays against historical human and recent avian influenza A(H2N2) viruses were performed across age groups in R…	Population Serologic Immunity to Human and Avian H2N2 Viruses in the United States and Hong Kong for Pandemic Risk Assessment	1	disease name: H2N2 viruses location: Rochester, New York date: - R0 value: <1.2 %CI values: - method: Hemagglutinin inhibition (HAI) assays against historical human and recent avian influenza A(H2N2) viruses | disease name: H2N2 viruses location: Hong Kong, China date: - R0 value: <1.2 %CI values: - method: Hemagglutinin inhibition (HAI) assays against historical human and recent avian influenza …	[{"contribution":{"disease name": "H2N2 viruses", "location": "Rochester, New York", "date": "-", "R0 value": "<1.2", "%CI values": "-", "method": "Hemagglutinin inhibition (HAI) assays against historical human and recent avian influenza A(H2N2) viruses"}},{"contribution":{"disease name": "H2N2 viruses", "location": "Hong Kong, China", "date": "-", "R0 value": "<1.2", "%CI values": "-", "method":…	2018-10-01 10:00:00		1200
9blabiww	9blabiww	Background: Small studies have correlated hypertension with pneumonia risk; whether this is recapitulated in larger prospective studies, and represents a causal association, is unclear. Methods: We estimated the risk for prevalent hypertension with incident respiratory diseases over mean follow-up of 8 years among 377,143 British participants in the UK Biobank. Mendelian randomization of blood pr…	Elevated Blood Pressure Increases Pneumonia Risk: Epidemiological Association and Mendelian Randomization in the UK Biobank	-1	unanswerable	unanswerable	2020
xpqi1rwp	xpqi1rwp	Background: Severe Acute Respiratory Syndrome Coronavirus 2 (SARS-CoV-2) has entered our lives with the fear of outbreak, death, and recurrence. Our objective in this study is to evaluate the epidemiological features of Coronavirus Disease 2019 (COVID-19) infection and death in Fars province, Iran. Methods: A cross-sectional study was conducted from February 18th to September 30th, 2020, where ag…	Epidemiological Study of Infection and Death Due to COVID-19 in Fars Province, Iran, From February to September 2020	1	disease name: Coronavirus Disease 2019 (COVID-19) location: Fars Province, Iran date: February 18th to September 30th, 2020 R0 value: 2.8 %CI values: - method: Cross-sectional study	[{"contribution":{"disease name": "Coronavirus Disease 2019 (COVID-19)", "location": "Fars Province, Iran", "date": "February 18th to September 30th, 2020", "R0 value": "2.8", "%CI values": "-", "method": "Cross-sectional study"}}]	2022
ldvhl5ik	ldvhl5ik	BACKGROUND: We recently showed that seasonal patterns of COVID-19 incidence and Influenza-Like Illnesses incidence are highly similar, in a country in the temperate climate zone, such as the Netherlands. We hypothesize that in The Netherlands the same environmental factors and mobility trends that are associated with the seasonality of flu-like illnesses are predictors of COVID-19 seasonality as …	Environmental factors and mobility predict COVID-19 seasonality in the Netherlands	-1	unanswerable	unanswerable	2022-03-04 05:00:00	keep	154
l9x8c2dq	l9x8c2dq	To counter the second COVID-19 wave, the Italian government has adopted a scheme of three sets of restrictions (coded as yellow, orange, and red) imposed on a regional basis. We estimate that milder restrictions in regions at lower risk (yellow) resulted in a transmissibility reduction of about 18%, leading to a reproduction number Rt of about 0.99. Stricter measures (orange and red) led to reduc…	Effectiveness of regional restrictions in reducing SARS-CoV-2 transmission during the second wave of COVID-19, Italy.	-1	unanswerable	unanswerable	2021-01-11 05:00:00
byvxg8o1	byvxg8o1	Background: The SEIR model or a variation of it is commonly used to study epidemic spread and make predictions on how it evolves. It is used to guide officials in their response to an epidemic. This research demonstrates an effective and simple approach that estimates the parameters of any variations of the SEIR model. This new technique will be demonstrated on the spread of COVID-19 in Libya. Me…	A New Mathematical Approach for the Estimation of epidemic Model Parameters with Demonstration on COVID-19 Pandemic in Libya	1	disease name: COVID-19 location: Libya date: May 5th R0 value: 7.6 %CI values: - method: SEIR model	[{"contribution":{"disease name": "COVID-19", "location": "Libya", "date": "May 5th", "R0 value": "7.6", "%CI values": "-", "method": "SEIR model"}}]	2020-07-21
rr7r7ef0	rr7r7ef0	The outbreak of the novel coronavirus disease, COVID-19, originating from Wuhan, China in early December, has infected more than 70,000 people in China and other countries and has caused more than 2,000 deaths. As the disease continues to spread, the biomedical society urgently began identifying effective approaches to prevent further outbreaks. Through rigorous epidemiological analysis, we chara…	Characterizing the transmission and identifying the control strategy for COVID-19 through epidemiological modeling	1	disease name: COVID-19 location: - date: - R0 value: 5.6 %CI values: - method: rigorous epidemiological analysis	[{"contribution":{"disease name": "COVID-19", "location": "-", "date": "-", "R0 value": "5.6", "%CI values": "-", "method": "rigorous epidemiological analysis"}}]	2020-02-25 05:00:00
mqsudckd	mqsudckd	I describe SIR modeling of the COVID-19 pandemic in two U.S. urban environments, New York City (NYC) and Cook County, IL, from onset through the month of June, 2020. Since testing was not widespread early in the pandemic in the U.S., I do not use data on confirmed cases and rely solely on public fatality data to estimate model parameters. Fits to the first 20 days of data determine a degenerate c…	A "Tail" of Two Cities: Fatality-based Modeling of COVID-19 Evolution in New York City and Cook County, IL	-1	unanswerable	unanswerable	2020-08-12 10:00:00
ho27d3ob	ho27d3ob	BackgroundThe outbreak of Coronavirus disease, which originated in Wuhan, China in 2019, has affected the lives of billions of people globally. Throughout 2020, the reproduction number of COVID-19 was widely used by decision-makers to explain their strategies to control the pandemic. MethodsIn this work, we deduce and analyze both initial and effective reproduction numbers for 12 diverse world re…	Human behaviour, NPI and mobility reduction effects on COVID-19 transmission in different countries of the world	0	disease name: COVID-19 location: 12 diverse world regions date: February and December of 2020. R0 value: - %CI values: - method: -	[{"contribution":{"disease name": "COVID-19", "location": "12 diverse world regions", "date": "February and December of 2020.", "R0 value": "-", "%CI values": "-", "method": "-"}}]	2022
a89zj5mh	a89zj5mh	BACKGROUND: Mathematical modeling of virus dynamics has provided quantitative insights into viral infections such as influenza, the simian immunodeficiency virus/human immunodeficiency virus, hepatitis B, and hepatitis C. Through modeling, we can estimate the half-life of infected cells, the exponential growth rate, and the basic reproduction number (R(0)). To calculate R(0) from virus load data,…	Improving the estimation of the death rate of infected cells from time course data during the acute phase of virus infections: application to acute HIV-1 infection in a humanized mouse model	1	disease name: HIV-1 location: - date: - R0 value: 2.30 %CI values: - method: Reduced quasi-steady state (RQS) model | disease name: HIV-1 location: - date: - R0 value: 2.38 %CI values: - method: the piece-wise regression (PWR) model	[{"contribution":{"disease name": "HIV-1", "location": "-", "date": "-", "R0 value": "2.30", "%CI values": "-", "method": "Reduced quasi-steady state (RQS) model"}},{"contribution":{"disease name": "HIV-1", "location": "-", "date": "-", "R0 value": "2.38", "%CI values": "-", "method": "the piece-wise regression (PWR) model"}}]	2014-05-21 10:00:00		1234
vc29aif3	vc29aif3	Mass media reports can induce individual behaviour change during a disease outbreak, which has been found to be useful as it reduces the force of infection. We propose a compartmental model by including a new compartment of the intensity of the media reports, which extends existing models by considering a novel media function, which is dependent both on the number of infected individuals and on t…	Optimal media reporting intensity on mitigating spread of an emerging infectious disease	0	disease name: 2009 A/H1N1 influenza location: Shaanxi Province of China date: - R0 value: - %CI values: - method: compartmental model by including a new compartment of the intensity of the media reports	[{"contribution":{"disease name": "2009 A/H1N1 influenza", "location": "Shaanxi Province of China", "date": "-", "R0 value": "-", "%CI values": "-", "method": "compartmental model by including a new compartment of the intensity of the media reports"}}]	2019-03-21 05:00:00
ddyidt3n	ddyidt3n	Containment strategies to combat epidemics such as SARS-CoV-2/COVID-19 require the availability of epidemiological parameters, e.g., the effective reproduction number. Parametric models such as the commonly used susceptible-infected-removed (SIR) compartment models fitted to observed incidence time series have limitations due to the time-dependency of the parameters. Furthermore, fatalities are d…	Exploring COVID-19 daily records of diagnosed cases and fatalities based on simple nonparametric methods	1	disease name: SARS-CoV-2/COVID-19 location: Germany date: - R0 value: 2.4 and 3.4 %CI values: - method: comprehensible nonparametric methods including time-delay correlation analyses	[{"contribution":{"disease name": "SARS-CoV-2/COVID-19", "location": "Germany", "date": "-", "R0 value": "2.4 and 3.4", "%CI values": "-", "method": "comprehensible nonparametric methods including time-delay correlation analyses"}}]	2021
ecen7ke8	ecen7ke8	Objective: To understand the epidemiological characteristics of COVID-19 cases in different epidemic stages in Gansu province. Methods: Epidemiological investigation was conducted to collect the information of confirmed COVID-19 cases, including demographic, epidemiological and clinical information. Results: As of 25 February 2020, a total of 91 confirmed COVID-19 cases had been reported in Gansu…	[Epidemiological characteristics of COVID-19 in Gansu province]	1	disease name: COVID-19 location: Gansu province date: As of 25 February 2020 R0 value: decreased from 2.61 in imported case stage to 0.66 in indigenous case stage %CI values: - method: Epidemiological investigation	[{"contribution":{"disease name": "COVID-19", "location": "Gansu province", "date": "As of 25 February 2020", "R0 value": "decreased from 2.61 in imported case stage to 0.66 in indigenous case stage", "%CI values": "-", "method": "Epidemiological investigation"}}]	2020
crhs4ygw	crhs4ygw	BACKGROUND SARS-CoV-2 RNA quantities, measured by reverse transcription quantitative PCR (RT-qPCR), have been proposed to stratify clinical risk or determine analytical performance targets. We investigated reproducibility and how setting diagnostic cut-offs altered the clinical sensitivity of COVID-19 testing. METHODS Quantitative SARS-CoV-2 RNA distributions (Cq and copies/mL) from more than 600…	The dangers of using Cq to quantify nucleic acid in biological samples; a lesson from COVID-19.	-1	unanswerable	unanswerable	2021-10-11 10:00:00
c4a7h4ab	c4a7h4ab	OBJECTIVE: While interest in elective robotic surgery is growing, use in emergency setting remains limited due to challenges posed by sicker patients, advanced pathology and logistical issues. During the COVID-19 pandemic, robotic surgery could provide the benefit of having the surgeon away from the bedside and reducing the number of directly exposed medical staff. The objective of this study was…	Emergency robotic colorectal surgery during COVID-19 pandemic: A retrospective case series study	-1	unanswerable	unanswerable	2022-03-22 05:00:00
prifbaqy	prifbaqy	The control of Covid 19 epidemics by public health policy in Italy during the first and the second epidemic waves has been driven by using reproductive number Rt(t) to identify the supercritical (percolative), the subcritical (arrested), separated by the critical regime. Here we show that to quantify the Covid-19 spreading rate with containment measures (CSRwCM) there is a need of a 3D expanded p…	Metastable states in plateaus and multi-wave epidemic dynamics of Covid-19 spreading in Italy	-1	unanswerable	unanswerable	2021
4oyejow9	4oyejow9	How to avoid a second wave of COVID-19 after reopening the economy is a pressing question. The extremely high basic reproductive number $R_0$ (5.7 to 6.4, shown in new studies) of SARS-CoV-2 further complicates the challenge. Here we assess effects of Social distancing 2.0, i.e. proximity alert (to maintain inter-personal distance) plus privacy-preserving contact tracing. To solve the dual task, …	Social Distancing 2.0 with Privacy-Preserving Contact Tracing to Avoid a Second Wave of COVID-19	-1	unanswerable	unanswerable	2020
f0ohxkjm	f0ohxkjm	The first case of Corona Virus Disease 2019 (COVID-19) was reported in Wuhan, China in December 2019. Since then, COVID-19 has quickly spread out to all provinces in China and over 150 countries or territories in the world. With the first level response to public health emergencies (FLRPHE) launched over the country, the outbreak of COVID-19 in China is achieving under control in China. We develo…	The Impact of Isolation on the Transmission of COVID-19 and Estimation of Potential Second Epidemic in China	1	disease name: Corona Virus Disease 2019 (COVID-19) location: China (excluding Hubei province) date: January 30 R0 value: 2.5 %CI values: - method: mathematical model based on epidemiology of COVID-19, incorporating the isolation of healthy people, confirmed cases and close contacts | disease name: Corona Virus Disease 2019 (COVID-19) location: Hubei province date: January 30 R0 value: 2.9 %CI val…	[{"contribution":{"disease name": "Corona Virus Disease 2019 (COVID-19)", "location": "China (excluding Hubei province)", "date": "January 30", "R0 value": "2.5", "%CI values": "-", "method": "mathematical model based on epidemiology of COVID-19, incorporating the isolation of healthy people, confirmed cases and close contacts"}},{"contribution":{"disease name": "Corona Virus Disease 2019 (COVID-…	2020		1551
mw8uliak	mw8uliak	In this work, we extend existing models of vector-borne diseases by including density-dependent rates and some existing control mechanisms to decrease the disease burden in the human population. We begin by analyzing the vector model dynamics and by determining the offspring reproductive number denoted by N as well as the trivial and nontrivial equilibria. Using theory of cooperative systems and …	Mathematical modeling and projections of a vector-borne disease with optimal control strategies: A case study of the Chikungunya in Chad	1	disease name: Chikungunya location: Chad date: - R0 value: 1.8519 %CI values: - method: non-linear least-square method	[{"contribution":{"disease name": "Chikungunya", "location": "Chad", "date": "-", "R0 value": "1.8519", "%CI values": "-", "method": "non-linear least-square method"}}]	2021
58qmh46w	58qmh46w	Objective: To analyze of the transmission characteristics of a cluster of COVID-19 cases in Chongqing and evaluate the infectivity of COVID-19 in the incubation period. Methods: A retrospective survey was conducted by using unified questionnaire through field and telephone interviews among 129 close contacts of COVID-19 cases. The relationship of transmission was indicated by transmission chain, …	[Investigation of transmission chain of a cluster COVID-19 cases].	1	disease name: COVID-19 location: Chongqing date: - R0 value: 3.8 %CI values: - method: Field and telephone interviews	[{"contribution":{"disease name": "COVID-19", "location": "Chongqing", "date": "-", "R0 value": "3.8", "%CI values": "-", "method": "Field and telephone interviews"}}]	2020-05-13
rslc829m	rslc829m	Background Some aspects of severe acute respiratory syndrome coronavirus 2 (SARS-CoV-2) transmission in children and adults remain unclear. This report describes different SARS-CoV-2 transmission patterns by age group in Japan. Methods and findings This retrospective observational case series study analyzed transmission patterns of real-time polymerase chain reaction (RT-PCR)-confirmed SARS-CoV-2…	SARS-CoV-2 infection control implementation based on sources of infection showing directions for three age groups in Japan	1	disease name: SARS-CoV-2 location: Japan date: during January 14 through July 31, 2020 R0 value: underage infection sources directed to underage, adult, and elderly people were estimated respectively as 0.0415 (95% CI, 0.0138- 0.0691), 1.11 (95% CI, 0.9171-1.3226), and 0.2811 (95% CI, 0.2074-0.3687) %CI values: - method: - | disease name: SARS-CoV-2 location: Japan date: during January 14 through…	[{"contribution":{"disease name": "SARS-CoV-2", "location": "Japan", "date": "during January 14 through July 31, 2020", "R0 value": "underage infection sources directed to underage, adult, and elderly people were estimated respectively as 0.0415 (95% CI, 0.0138- 0.0691), 1.11 (95% CI, 0.9171-1.3226), and 0.2811 (95% CI, 0.2074-0.3687)", "%CI values": "-", "method": "-"}},{"contribution":{"disease…	2021-01-15		1500
5deyoiq8	5deyoiq8	Finding medications or vaccines that may decrease the infectious period of severe acute respiratory syndrome coronavirus 2 (SARS-CoV-2) could potentially reduce transmission in the broader population. We developed a computational model of the U.S. simulating the spread of SARS-CoV-2 and the potential clinical and economic impact of reducing the infectious period duration. Simulation experiments f…	The value of decreasing the duration of the infectious period of severe acute respiratory syndrome coronavirus 2 (SARS-CoV-2) infection	1	disease name: severe acute respiratory syndrome coronavirus 2 (SARS-CoV-2) location: U.S. date: - R0 value: 2.5 %CI values: - method: computational model of the U.S. simulating the spread of SARS-CoV-2 and the potential clinical and economic impact of reducing the infectious period duration	[{"contribution":{"disease name": "severe acute respiratory syndrome coronavirus 2 (SARS-CoV-2)", "location": "U.S.", "date": "-", "R0 value": "2.5", "%CI values": "-", "method": "computational model of the U.S. simulating the spread of SARS-CoV-2 and the potential clinical and economic impact of reducing the infectious period duration"}}]	2021-01-07
qz06ccmt	qz06ccmt	Background: The transmissibility of SARS-CoV-2 determines both the ability of the virus to invade a population and the strength of intervention that would be required to contain or eliminate the spread of infection. The basic reproduction number, R0, provides a quantitative measure of the transmission potential of a pathogen. Objective: Conduct a scoping review of the available literature providi…	The basic reproduction number of SARS-CoV-2: a scoping review of available evidence	-1	unanswerable	unanswerable	2020-07-30 10:00:00
u5o6fq24	u5o6fq24	Emerging and re-emerging infections such as SARS (2003) and pandemic H1N1 (2009) have caused concern for public health researchers and policy makers due to the increased burden of these diseases on health care systems. This concern has prompted the use of mathematical models to evaluate strategies to control disease spread, making these models invaluable tools to identify optimal intervention str…	Early real-time estimation of the basic reproduction number of emerging or reemerging infectious diseases in a community with heterogeneous contact pattern: Using data from Hong Kong 2009 H1N1 Pandemic Influenza as an illustrative example	-1	unanswerable	unanswerable	2015-09-15
pytbdsq1	pytbdsq1	Background: The spread of the novel coronavirus seems mysterious enough to make us double-check the indices being used to predict its transmission. In this study, serological analysis was performed to assess some metric and epidemiological aspects of the infection and its transmissibility among people in contact with SARA-CoV-2 patients. Material and Methods: A total of 453 contacts of 40 COVID-1…	A contact tracing prospective cohort retrieving epidemiological facts on sars-cov-2 transmission aspects: A serological analysis in an iranian community	1	disease name: novel coronavirus location: iranian community date: - R0 value: 2.58 %CI values: - method: SPSS V21.0 and R software	[{"contribution":{"disease name": "novel coronavirus", "location": "iranian community", "date": "-", "R0 value": "2.58", "%CI values": "-", "method": "SPSS V21.0 and R software"}}]	2021
tat7wuvc	tat7wuvc	COVTD-19 is an infectious disease which is spreading as a global pandemy to the whole world. This paper exlplores nonlinear compartemental dynamic models which is used to model the spread of Covid-19. The Susceptible-Infected-Removed (SIR) model is one of the compartmental dynamic models which can be used to simulate what happens when someone in the community catches a disease, like Covid-19. The…	Lyapunov Stability Analysis of Covid 19 SIR Modeling	-1	unanswerable	unanswerable	2021
zefl5ul8	1sc17vgr	Although many persons in the United States have acquired immunity to COVID-19, either through vaccination or infection with SARS-CoV-2, COVID-19 will pose an ongoing threat to non-immune persons so long as disease transmission continues. We can estimate when sustained disease transmission will end in a population by calculating the population-specific basic reproduction number [R]0, the expected …	Bayesian Inference of State-Level COVID-19 Basic Reproduction Numbers across the United States	1	disease name: COVID-19 location: New Jersey date: 21-January-2020 to 21-June-2020 R0 value: 7.1 %CI values: - method: Bayesian inference | disease name: COVID-19 location: Wyoming date: 21-January-2020 to 21-June-2020 R0 value: 2.3 %CI values: - method: Bayesian inference	[{"contribution":{"disease name": "COVID-19", "location": "New Jersey", "date": "21-January-2020 to 21-June-2020", "R0 value": "7.1", "%CI values": "-", "method": "Bayesian inference"}},{"contribution":{"disease name": "COVID-19", "location": "Wyoming", "date": "21-January-2020 to 21-June-2020", "R0 value": "2.3", "%CI values": "-", "method": "Bayesian inference"}}]	2021	change_main_cord_id	187
6xntkvki	6xntkvki	COVID-19 pandemic has rapidly spread worldwide. Spain has suffered one of the largest nationwide bursts, particularly in the highly populated areas of Madrid and Barcelona (two of the five largest conurbations in Europe). We used segmented regression analyses to identify shifts in the evolution of the effective reproduction number (Rt) reported for 16 Spanish administrative regions. We associate …	COVID-19 effective reproduction number dropped during Spain's nationwide dropdown, then spiked at lower-incidence regions	-1	unanswerable	unanswerable	2020-09-09 10:00:00
b2f0pn3l	b2f0pn3l	The role of asymptomatic carriers in transmission poses challenges for control of the COVID-19 pandemic. Study of asymptomatic transmission and implications for surveillance and disease burden are ongoing, but there has been little study of the implications of asymptomatic transmission on dynamics of disease. We use a mathematical framework to evaluate expected effects of asymptomatic transmissio…	The time scale of asymptomatic transmission affects estimates of epidemic potential in the COVID-19 outbreak	-1	unanswerable	unanswerable	2020
avjugdkq	avjugdkq	It is of great theoretical and application value to accurately forecast the spreading dynamics of COVID-19 epidemic. We first proposed and established a Bayesian model to predict the epidemic spreading behavior. In this model, the infection probability matrix is estimated according to the individual contact frequency in certain population group. This infection probability matrix is highly correla…	A Continuous Bayesian Model for the Stimulation COVID-19 Epidemic Dynamics	-1	unanswerable	unanswerable	2021-06-22 10:00:00
squ2ksbg	squ2ksbg	Studies of novel coronavirus disease 2019 (COVID-19), which is caused by severe acute respiratory syndrome coronavirus 2 (SARS-CoV-2), have reported varying estimates of epidemiological parameters, including serial interval distributions-i.e., the time between illness onset in successive cases in a transmission chain-and reproduction numbers. By compiling a line-list database of transmission pair…	Serial interval of SARS-CoV-2 was shortened over time by nonpharmaceutical interventions	-1	unanswerable	unanswerable	2020
o03j064x	o03j064x	An [Formula: see text] epidemiological model with suscptibles dispersal between two patches is addressed and discussed. The basic reproduction numbers [Formula: see text] and [Formula: see text] are defined as the threshold parameters. It shows that if both [Formula: see text] and [Formula: see text] are below unity, the disease-free equilibrium is shown to be globally asymptotically stable by us…	Global dynamics for an SIR patchy model with susceptibles dispersal	-1	unanswerable	unanswerable	2012-08-01 10:00:00
8dwq6bib	8dwq6bib	The aim of this study is the characterization and genomic tracing by phylogenetic analyses of 59 new SARS-CoV-2 Italian isolates obtained from patients attending clinical centres in North and Central Italy until the end of April 2020. All but one of the newly-characterized genomes belonged to the lineage B.1, the most frequently identified in European countries, including Italy. Only a single seq…	Molecular Tracing of SARS-CoV-2 in Italy in the First Three Months of the Epidemic	-1	unanswerable	unanswerable	2020
g0rfkk9b	g0rfkk9b	The COVID-19 pandemic has resulted in more 176 million cases and around 3.82 million deaths worldwide. Different drug interventions acting at multiple stages of the pathogenesis of COVID-19 can substantially reduce infection-induced mortality. The current within-host mathematical modeling studies deals with the optimal combined drug intervention strategy and its efficacy in reducing the burden of…	Combined drug interventions and its efficacy in the reduction of COVID-19 burden: A within-host modeling study with reference to HCQ and BCG vaccination	-1	unanswerable	unanswerable	2021
9ymxgwj9	9ymxgwj9	Background Paediatric palliative care services in LMIC countries compete for resources with many other priorities. Their provision is desirable and includes advocacy, training health and community care workers, policy development and mentorship. Objectives The THET J&J start-up grants provided an ideal opportunity to establish a partnership with the Ministry of Health (MoH). The long term aim bei…	Development of a partnership to improve palliative care services for children in the Gambia	-1	unanswerable	unanswerable	2021
qmrxje99	qmrxje99	There was a fury of the pandemic because of novel coronavirus (2019-nCoV/SARS-CoV-2) that happened in Wuhan, Hubei province, in China in December 2019. Since then, many model predictions on the COVID-19 pandemic in Wuhan and other parts of China have been reported. The first incident of coronavirus disease 2019 (COVID-19) in India was reported on 30 January 2020, which was a student from Wuhan. T…	COVID-19 peak estimation and effect of nationwide lockdown in India	1	disease name: coronavirus disease 2019 (COVID-19) location: India date: from 30 February to 14 April 2020 R0 value: 3.3 %CI values: 95%CI, 3.1 to 3.5 method: epidemic compartmental model SEIR	[{"contribution":{"disease name": "coronavirus disease 2019 (COVID-19)", "location": "India", "date": "from 30 February to 14 April 2020", "R0 value": "3.3", "%CI values": "95%CI, 3.1 to 3.5", "method": "epidemic compartmental model SEIR"}}]	2020-05-13
yp9kj5cv	yp9kj5cv	BACKGROUND: Since the coronavirus disease 2019 outbreak began in the Chinese city of Wuhan on Dec 31, 2019, 68 imported cases and 175 locally acquired infections have been reported in Singapore. We aimed to investigate options for early intervention in Singapore should local containment (eg, preventing disease spread through contact tracing efforts) be unsuccessful. METHODS: We adapted an influen…	Interventions to mitigate early spread of SARS-CoV-2 in Singapore: a modelling study	-1	unanswerable	unanswerable	2020
aek3t5w6	aek3t5w6	Detection and isolation of infected people are believed to play an important role in the control of the COVID-19 pandemic. Some countries conduct large-scale screenings for testing, whereas others test mainly people with high prior probability of infection such as showing severe symptoms and/or having an epidemiological link with a known or suspected case or cluster of cases. However, what a good…	Relationship of Test Positivity Rates with COVID-19 Epidemic Dynamics	-1	unanswerable	unanswerable	2021
u5qt9es8	u5qt9es8	OBJECTIVES: The outbreak of Middle Eastern respiratory syndrome coronavirus (MERS-CoV) was one of the major events in South Korea in 2015. In particular, this study pays attention to formulating a mathematical model for MERS transmission dynamics and estimating transmission rates. METHODS: Incidence data of MERS-CoV from the government authority was analyzed for the first aim and a mathematical m…	The Characteristics of Middle Eastern Respiratory Syndrome Coronavirus Transmission Dynamics in South Korea	0	disease name: MERS location: South Korea date: - R0 value: - %CI values: - method: mathematical mode	[{"contribution":{"disease name": "MERS", "location": "South Korea", "date": "-", "R0 value": "-", "%CI values": "-", "method": "mathematical mode"}}]	2016-01-18 05:00:00
926bl05q	926bl05q	Studies on the early introduction of SARS-CoV-2 in a naive population have important epidemic control implications. We report findings from the epidemiological investigation of the initial 135 COVID-19 cases in Brunei and describe the impact of control measures and travel restrictions. Epidemiological and clinical information was obtained for all confirmed COVID-19 cases, whose symptom onset was …	Epidemiological Investigation of the First 135 COVID-19 Cases in Brunei: Implications for Surveillance, Control, and Travel Restrictions	1	disease name: COVID-19 location: Brunei date: from March 9 to April 5, 2020 R0 value: between 3.9 and 6.0 %CI values: - method: Time-varying R	[{"contribution":{"disease name": "COVID-19", "location": "Brunei", "date": "from March 9 to April 5, 2020", "R0 value": "between 3.9 and 6.0", "%CI values": "-", "method": "Time-varying R"}}]	2020
5wn7l61e	5wn7l61e	BACKGROUND: The required efforts, feasibility and predicted success of an intervention strategy against an infectious disease are partially determined by its basic reproduction number, R(0). In its simplest form R(0) can be understood as the product of the infectious period, the number of infectious contacts and the per-contact transmission probability, which in the case of vector-transmitted dis…	Robustness of the reproductive number estimates in vector-borne disease systems	-1	unanswerable	unanswerable	2018-12-17
bu43gmpc	bu43gmpc	BACKGROUND: The role of demographic factors, climatic conditions, school cycles, and connectivity patterns in shaping the spatio-temporal dynamics of pandemic influenza is not clearly understood. Here we analyzed the spatial, age and temporal evolution of the 2009 A/H1N1 influenza pandemic in Chile, a southern hemisphere country covering a long and narrow strip comprising latitudes 17Ã‚Â°S to 56Ã…	The influence of climatic conditions on the transmission dynamics of the 2009 A/H1N1 influenza pandemic in Chile	1	disease name: A/H1N1 influenza location: Chile, southern region date: 01-May to 31-December, 2009 R0 value: 1.6-2.0 %CI values: - method: growth rate of the exponential pandemic phase by date of symptoms onset | disease name: A/H1N1 influenza location: Chile, central region date: 01-May to 31-December, 2009 R0 value: 1.3-1.5 %CI values: - method: growth rate of the exponential pandemic phase by d…	[{"contribution":{"disease name": "A/H1N1 influenza", "location": "Chile, southern region", "date": "01-May to 31-December, 2009", "R0 value": "1.6-2.0", "%CI values": "-", "method": "growth rate of the exponential pandemic phase by date of symptoms onset"}},{"contribution":{"disease name": "A/H1N1 influenza", "location": "Chile, central region", "date": "01-May to 31-December, 2009", "R0 value":…	2012-11-13 05:00:00		1177
fdwrrpnl	fdwrrpnl	BACKGROUND: Since the 2009 A/H1N1 pandemic, Public Health England have developed a suite of real-time statistical models utilising enhanced pandemic surveillance data to nowcast and forecast a future pandemic. Their ability to track seasonal influenza and predict heightened winter healthcare burden in the light of high activity in Australia in 2017 was untested. METHODS: Four transmission models …	Forecasting the 2017/2018 seasonal influenza epidemic in England using multiple dynamic transmission models: a case study	-1	unanswerable	unanswerable	2020-04-15
m9mrbf3l	m9mrbf3l	OBJECTIVES: Universities are exploring strategies to mitigate the spread of COVID-19 prior to reopening their campuses. National guidelines do not currently recommend testing students prior to campus arrival. However, the impact of presemester testing has not been studied. DESIGN: Dynamic SARS-CoV-2 transmission models are used to explore the effects of three presemester testing interventions. IN…	Modelling the impact of presemester testing on COVID-19 outbreaks in university campuses	-1	unanswerable	unanswerable	2020-12-15 05:00:00
o5twfbsh	o5twfbsh	This study examined four countries Israel, United States, United Kingdom, and Serbia and present their possible vaccination trajectories into 2021. We found that populations in all the four countries are relaxing and taking the advantage of the benefit of an increasingly immunized community hence, experiencing a rising phase of Rc(t). The United States is of particular concern, due to its fast ri…	Estimation of the Reproduction Number for COVID-19 Based on Latest Vaccination Results and the Timing for Herd-Immunity: Prospect for 2021	1	disease name: COVID-19 location: Israel date: 2021 R0 value: 2.2 %CI values: - method: -	[{"contribution":{"disease name": "COVID-19", "location": "Israel", "date": "2021", "R0 value": "2.2", "%CI values": "-", "method": "-"}}]	2021-03-26
qugxks5e	qugxks5e	The novel coronavirus disease 2019 (COVID-19) infection broke out in December 2019 in Wuhan, and rapidly overspread 31 provinces in mainland China on 31 January 2020. In the face of the increasing number of daily confirmed infected cases, it has become a common concern and worthy of pondering when the infection will appear the turning points, what is the final size and when the infection would be…	Current trends and future prediction of novel coronavirus disease (COVID-19) epidemic in China: a dynamical modeling analysis.	1	disease name: novel coronavirus disease 2019 (COVID-19) location: Wuhan, China date: - R0 value: 5.78 %CI values: 95%CI: 5.71-5.89 method: Markov Chain Monte Carlo algorithm	[{"contribution":{"disease name": "novel coronavirus disease 2019 (COVID-19)", "location": "Wuhan, China", "date": "-", "R0 value": "5.78", "%CI values": "95%CI: 5.71-5.89", "method": "Markov Chain Monte Carlo algorithm"}}]	2020-04-08
l0750hal	l0750hal	In the night of February 20, 2020, the first case of novel coronavirus disease (COVID-19) was confirmed in the Lombardy Region, Italy. In the week that followed, Lombardy experienced a very rapid increase in the number of cases. We analyzed the first 5,830 laboratory-confirmed cases to provide the first epidemiological characterization of a COVID-19 outbreak in a Western Country. Epidemiological …	The early phase of the COVID-19 outbreak in Lombardy, Italy	1	disease name: COVID-19 location: Lombardy, Italy date: - R0 value: 3.1 %CI values: (95% CI, 2.9 to 3.2) method: -	[{"contribution":{"disease name": "COVID-19", "location": "Lombardy, Italy", "date": "-", "R0 value": "3.1", "%CI values": "(95% CI, 2.9 to 3.2)", "method": "-"}}]	2020
3g8pwbcq	3g8pwbcq	OBJECTIVES: The novel coronavirus (SARS-CoV-2) originating from Wuhan spread rapidly throughout China. While its origin remains uncertain, accumulating evidence links a wet market with the early spread of SARS-CoV-2 in Wuhan. Similarly, the influence of the marketplace on the early transmission dynamics is yet to be investigated. METHODS: Using the daily series of COVID-19 incidence, stratified a…	Effect of a wet market on coronavirus disease (COVID-19) transmission dynamics in China, 2019-2020	1	disease name: COVID-19 location: China date: 2019-2020 R0 value: 0.24 for market-to-human transmission %CI values: (95% CrI: 0.01-1.38) method: quantitative modeling analyses | disease name: COVID-19 location: China date: 2019-2020 R0 value: 2.37 for human-to-human transmission %CI values: (95% CrI: 2.08-2.71) method: quantitative modeling analyses	[{"contribution":{"disease name": "COVID-19", "location": "China", "date": "2019-2020", "R0 value": "0.24 for market-to-human transmission", "%CI values": "(95% CrI: 0.01-1.38)", "method": "quantitative modeling analyses"}},{"contribution":{"disease name": "COVID-19", "location": "China", "date": "2019-2020", "R0 value": "2.37 for human-to-human transmission", "%CI values": "(95% CrI: 2.08-2.71)"…	2020		69
ixtq6e46	ixtq6e46	In epidemiology, the effective reproduction number $R_e$ is used to characterize the growth rate of an epidemic outbreak. In this paper, we investigate properties of $R_e$ for a modified SEIR model of COVID-19 in the city of Houston, TX USA, in which the population is divided into low-risk and high-risk subpopulations. The response of $R_e$ to two types of control measures (testing and distancing…	Cost Effective Reproduction Number Based Strategies for Reducing Deaths from COVID-19	-1	unanswerable	unanswerable	2021-04-19
jsr6b9pb	jsr6b9pb	The spread of COVID-19 within a region in South East Asia has been modelled using a compartment model called SEIR (Susceptible, Exposed, Infected, Recovered). Actual number of sick people needing treatments, or the number active case data was used to obtain realistic values of the model parameters such as the reproduction number (R0), incubation, and recovery periods. It is shown that at the begi…	Application Of Seir Model In COVID-19 And The Effect Of Lockdown On Reducing The Number Of Active Cases	1	disease name: COVID-19 location: a region in South East Asia date: - R0 value: 3 %CI values: - method: compartment model (SEIR)	[{"contribution":{"disease name": "COVID-19", "location": "a region in South East Asia", "date": "-", "R0 value": "3", "%CI values": "-", "method": "compartment model (SEIR)"}}]	2020
yxhn0sns	yxhn0sns	BackgroundGovernments around the world have implemented non-pharmaceutical interventions to limit the transmission of COVID-19. While lockdowns and physical distancing have proven effective for reducing COVID-19 transmission, there is still limited understanding of how NPI measures are reflected in indicators of human mobility. Further, there is a lack of understanding about how findings from hig…	Estimating the relationship between mobility, non-pharmaceutical interventions, and COVID-19 transmission in Ghana	-1	unanswerable	unanswerable	2021
9yi3rv38	9yi3rv38	Multiple safe and effective vaccines and antiviral drugs have been approved or authorized for use against the COVID-19 pandemic in the United States. The effectiveness of these and other intervention measures is threatened by the emergence of numerous SARS-CoV-2 variants of concern. We present a model for studying the transmission dynamics of two of these variants (Delta and Omicron) in the prese…	Dynamics of the Delta and Omicron variants of SARS-CoV-2 in the United States: the battle of supremacy in the presence of vaccination, mask usage and antiviral treatment	1	disease name: COVID-19, Delta variant location: United States date: End of November 2021 to date R0 value: 0.28 %CI values: - method: Model fitted using daily case data for the COVID-19 pandemic in the United States | disease name: COVID-19, Omicron location: United States date: End of November 2021 to date R0 value: 0.96 %CI values: - method: Model fitted using daily case data for the COVID-19 p…	[{"contribution":{"disease name": "COVID-19, Delta variant", "location": "United States", "date": "End of November 2021 to date", "R0 value": "0.28", "%CI values": "-", "method": "Model fitted using daily case data for the COVID-19 pandemic in the United States"}},{"contribution":{"disease name": "COVID-19, Omicron", "location": "United States", "date": "End of November 2021 to date", "R0 value":…	2022-02-24 05:00:00		145
kpc35qbs	kpc35qbs	BACKGROUND: The dynamics of the COVID-19 pandemic vary owing to local population density and policy measures. During decision-making, policymakers consider an estimate of the effective reproduction number Rt, which is the expected number of secondary infections spread by a single infected individual. OBJECTIVE: We propose a simple method for estimating the time-varying infection rate and the Rt. …	Adaptive Susceptible-Infectious-Removed Model for Continuous Estimation of the COVID-19 Infection Rate and Reproduction Number in the United States: Modeling Study	-1	unanswerable	unanswerable	2021
2yzgc9xb	2yzgc9xb	Analysis of genetic sequence data from the SARS-CoV-2 pandemic can provide insights into epidemic origins, worldwide dispersal, and epidemiological history. With few exceptions, genomic epidemiological analysis has focused on geographically distributed data sets with few isolates in any given location. Here, we report an analysis of 20 whole SARS- CoV-2 genomes from a single relatively small and …	Genomic epidemiology of a densely sampled COVID-19 outbreak in China	1	disease name: COVID-19 location: Weifang, People's Republic of China date: 4 February R0 value: 3.4 %CI values: 95% highest posterior density interval: 2.1-5.2 method: Bayesian model-based phylodynamic methods	[{"contribution":{"disease name": "COVID-19", "location": "Weifang, People's Republic of China", "date": "4 February", "R0 value": "3.4", "%CI values": "95% highest posterior density interval: 2.1-5.2", "method": "Bayesian model-based phylodynamic methods"}}]	2021-03-14
ditadt8l	ditadt8l	The coronavirus disease 2019 (COVID-19) has been damaging our daily life after declaration of pandemic. Therefore, we have started studying on the characteristics of Susceptible-Infectious-Recovered (SIR) model to know about the truth of infectious disease and our future. After detailed studies on the characteristics of the SIR model for the various parameter dependencies with respect to such as …	Suppression of COVID-19 infection by isolation time control based on the SIR model and an analogy from nuclear fusion research	0	disease name: coronavirus disease 2019 (COVID-19) location: Tokyo date: - R0 value: - %CI values: - method: Susceptible-Infectious-Recovered (SIR) model	[{"contribution":{"disease name": "coronavirus disease 2019 (COVID-19)", "location": "Tokyo", "date": "-", "R0 value": "-", "%CI values": "-", "method": "Susceptible-Infectious-Recovered (SIR) model"}}]	2020-09-20 10:00:00
w5dmgt13	w5dmgt13	Coronavirus disease 2019 (covid-19), with the fatality rate in elder (60 years old or more) being much higher than young (60 years old or less) patients, was declared a pandemic by the World Health Organization on March 11, 2020. Taking into account this age-dependent fatality rate, a mathematical model considering young and elder subpopulations was formulated based on the natural history of covi…	Mathematical modeling of the transmission of SARS-CoV-2 '' Evaluating the impact of isolation in Sao Paulo State (Brazil) and lockdown in Spain associated with protective measures on the epidemic of covid-19	1	disease name: covid-19 location: Sao Paulo State (Brazil) date: - R0 value: 9.24 %CI values: - method: mathematical model considering young and elder subpopulation | disease name: covid-19 location: Spain date: - R0 value: 8 %CI values: - method: mathematical model considering young and elder subpopulation	[{"contribution":{"disease name": "covid-19", "location": "Sao Paulo State (Brazil)", "date": "-", "R0 value": "9.24", "%CI values": "-", "method": "mathematical model considering young and elder subpopulation"}},{"contribution":{"disease name": "covid-19", "location": "Spain", "date": "-", "R0 value": "8", "%CI values": "-", "method": "mathematical model considering young and elder subpopulation…	2020-08-01 10:00:00		598
0e0gnsb4	0e0gnsb4	A novel coronavirus strain, severe acute respiratory syndrome coronavirus 2 (SARS-CoV-2), emerged in China. This study aims to characterize key attributes of SARS-CoV-2 epidemiology as the infection emerged in China. An age-stratified mathematical model was constructed to describe transmission dynamics and estimate age-specific differences in biological susceptibility to infection, age-assortativ…	Characterizing key attributes of COVID-19 transmission dynamics in China's original outbreak: Model-based estimations	1	disease name: SARS-CoV-2 location: China date: - R0 value: 2.1 %CI values: (95% UI = 1.8-2.4) method: age-stratified mathematical model | disease name: SARS-CoV-2 location: China date: following interventions' onset R0 value: 0.06 %CI values: (95% UI = 0.05-0.07) method: age-stratified mathematical model	[{"contribution":{"disease name": "SARS-CoV-2", "location": "China", "date": "-", "R0 value": "2.1", "%CI values": "(95% UI = 1.8-2.4)", "method": "age-stratified mathematical model"}},{"contribution":{"disease name": "SARS-CoV-2", "location": "China", "date": "following interventions' onset", "R0 value": "0.06", "%CI values": "(95% UI = 0.05-0.07)", "method": "age-stratified mathematical model"}…	2020		25
at1jvlnn	6n1jlpvc	The role of mathematical models in controlling infectious diseases cannot be overemphasized. COVID-19 is a viral disease that is caused by Severe Acute Respiratory Syndrome coronavirus 2 (SARS-CoV-2) which has no approved vaccine. The available control measures are non-pharmacological interventions like wearing face masks, social distancing, and lockdown which are being advocated for by the WHO. …	The role of mathematical model in curbing COVID-19 in Nigeria	1	disease name: COVID-19 location: Nigeria date: - R0 value: R_0<1 %CI values: - method: community-based transmission model	[{"contribution":{"disease name": "COVID-19", "location": "Nigeria", "date": "-", "R0 value": "R_0<1", "%CI values": "-", "method": "community-based transmission model"}}]	2020-07-25	change_main_cord_id	546
4gr6i8rf	4gr6i8rf	As severe acute respiratory syndrome coronavirus 2 (SARS-CoV-2) spreads, the susceptible subpopulation declines causing the rate at which new infections occur to slow down. Variation in individual susceptibility or exposure to infection exacerbates this effect. Individuals that are more susceptible or more exposed tend to be infected and removed from the susceptible subpopulation earlier. This se…	Herd immunity thresholds for SARS-CoV-2 estimated from unfolding epidemics	-1	unanswerable	unanswerable	2020-07-24 10:00:00
n4sc7g1u	n4sc7g1u	Mathematical modeling in epidemiology has a very important role in the study of the dynamics of an epidemic. The outbreak of COVID-19, which is currently being spread widely in the world requires in-depth study, starting from the search for sources, prediction of spread patterns, to strategies for handling this virus outbreak. Mathematical modeling can be applied to support various fields of the …	Pemodelan Matematika Penyebaran COVID-19 Di Provinsi Kalimantan Selatan	-1	unanswerable	unanswerable	2020
pxhott2p	pxhott2p	COVID-19 pandemic has become a major threat to the country. Till date, well tested medication or antidote is not available to cure this disease. According to WHO reports, COVID-19 is a severe acute respiratory syndrome which is transmitted through respiratory droplets and contact routes. Analysis of this disease requires major attention by the Government to take necessary steps in reducing the ef…	SEIR and Regression Model based COVID-19 outbreak predictions in India	1	disease name: COVID-19 location: India date: 30th January 2020 to 30th March 2020 R0 value: 2.02 %CI values: - method: SEIR model and Regression model	[{"contribution":{"disease name": "COVID-19", "location": "India", "date": "30th January 2020 to 30th March 2020", "R0 value": "2.02", "%CI values": "-", "method": "SEIR model and Regression model"}}]	2020-04-01 10:00:00
mip0v988	mip0v988	As countries in the world review interventions for containing the pandemic of coronavirus disease 2019 (COVID-19), important lessons can be drawn from the study of the full transmission dynamics of its causative agent-severe acute respiratory syndrome coronavirus 2 (SARS-CoV-2)- in Wuhan (China), where vigorous non-pharmaceutical interventions have suppressed the local outbreak of this disease1. …	Reconstruction of the full transmission dynamics of COVID-19 in Wuhan	1	disease name: COVID-19 location: Wuhan (China) date: 1 January and 8 March 2020 R0 value: 3.54 %CI values: (95% credible interval 3.40-3.67) method: modelling approach | disease name: COVID-19 location: Wuhan (China) date: as of 8 March 2022 R0 value: 0.28 %CI values: (95% credible interval 0.23-0.33) method: modelling approach	[{"contribution":{"disease name": "COVID-19", "location": "Wuhan (China)", "date": "1 January and 8 March 2020", "R0 value": "3.54", "%CI values": "(95% credible interval 3.40-3.67)", "method": "modelling approach"}},{"contribution":{"disease name": "COVID-19", "location": "Wuhan (China)", "date": "as of 8 March 2022", "R0 value": "0.28", "%CI values": "(95% credible interval 0.23-0.33)", "method…	2020		238
w63jlt4s	w63jlt4s	The transmission of severe acute respiratory syndrome coronavirus 2 (SARS-CoV-2) becomes pandemic, but presents different patterns in the world. To characterize the epi- demic of coronavirus disease 2019 (covid-19) in each countries and regions, mathematical models were formulated aiming the estimation of the basic reproduction number R0. Simple mathematical model, the SIR model, provided lower e…	The SIR model estimates incorrectly the basic reproduction number for the covid-19 epidemic	1	disease name: Coronavirus Disease 2019 (COVID-19) location: Sao Paulo State (Brazil) date: - R0 value: 9.24 %CI values: - method: more elaborate model | disease name: Coronavirus Disease 2019 (COVID-19) location: Spain date: - R0 value: 8.0 %CI values: - method: more elaborate model | disease name: Coronavirus Disease 2019 (COVID-19) location: - date: - R0 value: 1.5 to 3.0 %CI values: - method: …	[{"contribution":{"disease name": "Coronavirus Disease 2019 (COVID-19)", "location": "Sao Paulo State (Brazil)", "date": "-", "R0 value": "9.24", "%CI values": "-", "method": "more elaborate model"}},{"contribution":{"disease name": "Coronavirus Disease 2019 (COVID-19)", "location": "Spain", "date": "-", "R0 value": "8.0", "%CI values": "-", "method": "more elaborate model"}},{"contribution":{"di…	44117.4		1019
gz18sxzc	gz18sxzc	A better understanding of how the COVID-19 epidemic responds to social distancing efforts is required for the control of future outbreaks and to calibrate partial lock-downs. We present quantitative relationships between key parameters characterizing the COVID-19 epidemiology and social distancing efforts of nine selected European countries. Epidemiological parameters were extracted from the numb…	Effects of social distancing on the spreading of COVID-19 inferred from mobile phone data	-1	unanswerable	unanswerable	2020-06-26 10:00:00
66ulqu11	66ulqu11	Background: As the COVID-19 epidemic is spreading, incoming data allows us to quantify values of key variables that determine the transmission and the effort required to control the epidemic. We determine the incubation period and serial interval distribution for transmission clusters in Singapore and in Tianjin. We infer the basic reproduction number and identify the extent of pre-symptomatic tr…	Transmission interval estimates suggest pre-symptomatic spread of COVID-19	1	disease name: COVID-19 location: Singapore date: Jan.19-Feb.26 R0 value: 1.97 (1.45, 2.48) %CI values: - method: - | disease name: COVID-19 location: Tianjin, China date: Jan.21-Feb.27 R0 value: 1.87 (1.65,2.09) %CI values: - method: -	[{"contribution":{"disease name": "COVID-19", "location": "Singapore", "date": "Jan.19-Feb.26", "R0 value": "1.97 (1.45, 2.48)", "%CI values": "-", "method": "-"}},{"contribution":{"disease name": "COVID-19", "location": "Tianjin, China", "date": "Jan.21-Feb.27", "R0 value": "1.87 (1.65,2.09)", "%CI values": "-", "method": "-"}}]	2020-03-06 05:00:00		943
8jad0bcg	8jad0bcg	In this paper, for an infectious disease such as Covid-19, we present a SIR model which examines the impact of waning immunity, vaccination rates, vaccine efficacy, and the proportion of the susceptible population who aspire to be vaccinated. Under an assumed constant control reproduction number, we provide simple conditions for the disease to be eliminated, and conversely for it to exhibit the m…	A prototype vaccination model for endemic Covid-19 under waning immunity and imperfect vaccine take-up	-1	unanswerable	unanswerable	2021-11-11
ra1dy1i1	ra1dy1i1	Background: In late 2019, first cases of coronavirus disease 2019, or COVID-19, caused by the novel coronavirus SARS-CoV-2, were reported in Wuhan, China. Subsequently COVID-19 spread rapidly around the world. To contain the ensuing pandemic, numerous countries have implemented control measures related to international travel, including border closures, partial travel restrictions, entry or exit …	Travel-related control measures to contain the COVID-19 pandemic: a rapid review	-1	unanswerable	unanswerable	2020
66eqh79t	66eqh79t	Summary Epidemics of novel or re-emerging infectious diseases have quickly spread globally via air travel, as highlighted by pandemic H1N1 influenza in 2009 (pH1N1). Federal, state, and local public health responders must be able to plan for and respond to these events at aviation points of entry. The emergence of a novel influenza virus and its spread to the United States were simulated for Febr…	A model-based tool to predict the propagation of infectious disease via airports	-1	unanswerable	unanswerable	2012-01-31 05:00:00
zd4c3nep	zd4c3nep	This paper deals with the mathematical modeling of the second wave of COVID-19 and verifies the current Omicron variant pandemic data in India. We also we discussed such as uniformly bounded of the system, Equilibrium analysis and basic reproduction number R0. We calculated the analytic solutions by HPM (homotopy perturbation method) and used Mathematica 12 software for numerical analysis up to 8…	Stability and Numerical Solutions of Second Wave Mathematical Modeling on COVID-19 and Omicron Outbreak Strategy of Pandemic: Analytical and Error Analysis of Approximate Series Solutions by Using HPM	1	disease name: COVID-19 and Omicron Outbreak location: India date: January 2022 R0 value: 0.8454 - 2.0317 %CI values: - method: HPM (homotopy perturbation method) and used Mathematica 12 software)	[{"contribution":{"disease name": "COVID-19 and Omicron Outbreak", "location": "India", "date": "January 2022", "R0 value": "0.8454 - 2.0317", "%CI values": "-", "method": "HPM (homotopy perturbation method) and used Mathematica 12 software)"}}]	2022
bsfst41t	bsfst41t	Background: GC represents a worldwide problem;radical surgery remaining the gold standard of curative treatment. In the West, even with peri-operative chemotherapy, 5-year survival rate is approximately 40%. GC is a heterogeneous disease, well characterized by different molecular classifications, all having in common the role of the immune system and a T-cell inflamed phenotype across all subtype…	MONEO: A phase II study of avelumab (Av) plus FLOT in the peri-operative treatment for patients (pts) with resectable gastric or gastroesophageal junction cancer (GC)	-1	unanswerable	unanswerable	2021
3s2g3o81	3s2g3o81	In this work, a researcher develop $SHEIQRD$ (Susceptible-Stay at home-Exposed-Infected-Quarantine-Recovery-Death) coronavirus pandemic spread model. The disease-free and endemic equilibrium points are calculated and analyzed. The basic reproductive number $R_0$ is derived and its sensitivity analysis is done. COVID-19 pandemic spread is die out when $R_0\leq 1$ and its persist in the community w…	Model the transmission dynamics of COVID-19 propagation with public health intervention	0	disease name: COVID-19 location: - date: - R0 value: - %CI values: - method: Susceptible-Stay at home-Exposed-Infected-Quarantine-Recovery-Death) coronavirus pandemic spread model	[{"contribution":{"disease name": "COVID-19", "location": "-", "date": "-", "R0 value": "-", "%CI values": "-", "method": "Susceptible-Stay at home-Exposed-Infected-Quarantine-Recovery-Death) coronavirus pandemic spread model"}}]	2020-04-25 10:00:00
nhm24vmy	nhm24vmy	BACKGROUND: The novel coronavirus disease (COVID-19) culminated in a pandemic with many countries affected in varying stages. We aimed to develop a simulation environment for COVID-19 spread, taking environmental and social factors into account. METHODS: The program was written in R language. A stochastic point process simulation model for simulating epidemics, a maximum-likelihood estimation mod…	A stochastic process based modular tool-box for simulating COVID-19 infection spread	-1	unanswerable	unanswerable	2022-03-05
fbl13xq7	fbl13xq7	This paper addresses the problem of describing the spread of COVID-19 by a mathematical model introducing all the possible control actions as prevention (informative campaign, use of masks, social distancing, vaccination) and medication. The model adopted is similar to SEIQR, with the infected patients split into groups of asymptomatic subjects and isolated ones. This distinction is particularly …	A Control Based Mathematical Model for the Evaluation of Intervention Lines in COVID-19 Epidemic Spread: The Italian Case Study	-1	unanswerable	unanswerable	2021
0yjlpzwp	0yjlpzwp	OBJECTIVES: In the current early phase of the coronavirus disease 2019 (COVID-19) outbreak, Bali needs to prepare to face the escalation of cases, with a particular focus on the readiness of healthcare services. We simulated the future trajectory of the epidemic under current conditions, projected the impact of policy interventions, and analyzed the implications for healthcare capacity. METHODS: …	Forecasting COVID-19 Transmission and Healthcare Capacity in Bali, Indonesia	-1	unanswerable	unanswerable	2020
0ax7ovzv	0ax7ovzv	As of March 13, 2020, Europe became the center of COVID-19 pandemic. In order to prevent further spread and slow down the increase in confirmed cases and deaths, many countries in European Union have taken some interventions since mid-March. In this study, a metapopulation model was used to model the outbreak of COVID-19 in Europe and the effectiveness of these interventions were also estimated. …	An Analysis of Outbreak Dynamics and Intervention Effects for COVID-19 Transmission in Europe	-1	unanswerable	unanswerable	2020-07-25 10:00:00
m6u0xf5j	m6u0xf5j	We study epidemiological characteristics of 25 early COVID-19 outbreak countries, which emphasizes on the reproduction of infection and effects of government control measures. The study is based on a vSIADR model which allows asymptomatic and pre-diagnosis infections to reflect COVID-19 clinical realities, and a linear mixed-effect model to analyse the association between each country's control m…	Better strategies for containing COVID-19 pandemic: a study of 25 countries via a vSIADR model	-1	unanswerable	unanswerable	2021
idauypat	idauypat	Setting: Italy and especially Lombardy is experiencing a heavy burden of Covid-19 infection. The peak of the epidemics has not yet been reached and it is expected to be delayed in Central and Southern Italian regions compared to Northern ones. Objective: We have modeled the Covid-19 outbreak progression in Italian Regions vs. Lombardy to assess the epidemics. Primary and Secondary Measures: In ou…	Covid-19 Outbreak Progression in Italian Regions: Approaching the Peak by March 29th	1	disease name: Covid-19 location: Lombardy, Italy date: across a 1month period R0 value: 4.94 %CI values: the susceptible exposed infected removed (SEIR) compartment model, by fitting the exponential growth rate of the infection across a 1month period and also by using day by day assessment, based on single observations method: (SEIR) compartment model | disease name: Covid-19 location: Tuscany, I…	[{"contribution":{"disease name": "Covid-19", "location": "Lombardy, Italy", "date": "across a 1month period", "R0 value": "4.94", "%CI values": "the susceptible exposed infected removed (SEIR) compartment model, by fitting the exponential growth rate of the infection across a 1month period and also by using day by day assessment, based on single observations", "method": "(SEIR) compartment model…	2020-04-02 10:00:00		1031
n8vfx5xl	n8vfx5xl	This paper formulates and analyses a susceptible-exposed-infected-recovered (SEIR) type epidemic model with the effect of transport-related infection between two cities in the presence of treatment control. The dispersal of populations from one city to another city has an important impact on the dynamics of disease evolution. The basic reproduction number is calculated for all the different cases…	Population dispersal and optimal control of an SEIR epidemic model	-1	unanswerable	unanswerable	2020
pndu87bp	pndu87bp	We present a compartmental SEIAR model of epidemic spread as a generalization of the SEIR model. We believe that the asymptomatic infectious cohort is an omitted part of the understanding of the epidemic dynamics of disease COVID-19. We introduce and derive the basic reproduction number as the weighted arithmetic mean of the basic reproduction numbers of the symptomatic and asymptomatic cohorts. …	SEIAR model with asymptomatic cohort and consequences to efficiency of quarantine government measures in COVID-19 epidemic	1	disease name: COVID-19 location: European countries date: - R0 value: up to around 9 %CI values: - method: compartmental SEIAR model of epidemic spread as a generalization of the SEIR model	[{"contribution":{"disease name": "COVID-19", "location": "European countries", "date": "-", "R0 value": "up to around 9", "%CI values": "-", "method": "compartmental SEIAR model of epidemic spread as a generalization of the SEIR model"}}]	2020-04-06
355guih4	355guih4	SIMPLE SUMMARY: Year-long, every human race is fighting against SARS-CoV-2 with their all resources. Since 2017, the Bangladeshi government is providing shelter to a huge number of Rohingya refugees, and now in this COVID-19 pandemic, the government is to provide all necessities and medical supports to this population, while the country hardly can fulfill all rights of her own population. This st…	SARS-CoV-2 and Rohingya Refugee Camp, Bangladesh: Uncertainty and How the Government Took Over the Situation	1	disease name: COVID-19 location: Rohingya Refugee Camp, Bangladesh date: end of December 2020 R0 value: 0.7563 %CI values: - method: modified Susceptible-Exposed-Infectious-Recovered (SEIR) transmission model	[{"contribution":{"disease name": "COVID-19", "location": "Rohingya Refugee Camp, Bangladesh", "date": "end of December 2020", "R0 value": "0.7563", "%CI values": "-", "method": "modified Susceptible-Exposed-Infectious-Recovered (SEIR) transmission model"}}]	2021-02-05		1506
sy1eztce	sy1eztce	Global efforts to prevent the spread of the SARS-COV-2 pandemic in early 2020 focused on non-pharmaceutical interventions like social distancing; policies that aim to reduce transmission by changing mixing patterns between people. As countries have implemented these interventions, aggregated location data from mobile phones have become an important source of real-time information about human mobi…	The relationship between human mobility measures and SAR-Cov-2 transmission varies by epidemic phase and urbanicity: results from the United States	-1	unanswerable	unanswerable	2021-04-20 10:00:00
61o5f82j	61o5f82j	BackgroundMonitoring the time-varying reproduction number (Rt) of the disease is useful in determining whether there is sustained transmission in a population. In this study, we examined Rt of COVID-19 and compared its transmissibility between different intervention periods in Hangzhou and Shenzhen. MethodsDaily aggregated counts of confirmed imported and local cases between January 1, 2020 and M…	Transmissibility of coronavirus disease 2019 (COVID-19) in Chinese cities with different transmission dynamics of imported cases	-1	unanswerable	unanswerable	2020-03-18 05:00:00
ikv0xwwp	ikv0xwwp	The Covid-19 outbreak has led countries to implement unprecedented measures to limit virus spread within the population, impacting in particular the organization of workplaces, universities, schools. Yet, the power and limitations of such strategies remain unquantified. Here, we develop a simulation study to analyze Covid-19 transmission on three real-life contact networks from a workplace, a pri…	Analysis of mitigation of Covid-19 outbreaks in workplaces and schools by hybrid telecommuting	-1	unanswerable	unanswerable	2020-11-12 05:00:00
ajtq33sh	ajtq33sh	AIM: Comprehensive case investigation and contact tracing are crucial to prevent community spread of COVID-19. We demonstrated a utility of using traditional contact tracing measures supplemented with symptom tracking and contact management system to assist public health workers with high efficiency. METHODS: A centralized contact tracing system was developed to support data linkage, cross-jurisd…	Contact tracing with digital assistance in Taiwan's COVID-19 outbreak response	-1	unanswerable	unanswerable	2020
edpxab9w	edpxab9w	Intestinal microbiota can indirectly modulate airway physiology and immunity through the gut-lung axis. Recent microbiome studies indicate that patients with coronavirus disease 2019 (COVID-19) exhibit a specific intestinal dysbiosis that is closely associated with the disease pathophysiology. Therefore, rebalancing the intestinal microbiome using probiotics may be effective for controlling COVID…	Lactobacillus plantarum induces innate cytokine responses that potentially provide a protective benefit against COVID-19: A single-arm, double-blind, prospective trial combined with an in vitro cytokine response assay	-1	unanswerable	unanswerable	2021-11-02 05:00:00
efbt2xx0	efbt2xx0	Estimates of the reproductive number for novel pathogens such as severe acute respiratory syndrome coronavirus 2 are essential for understanding the potential trajectory of the epidemic and the level of intervention that is needed to bring the epidemic under control. However, most methods for estimating the basic reproductive number (R0) and time-varying effective reproductive number (Rt) assume …	The Impact of Changes in Diagnostic Testing Practices on Estimates of COVID-19 Transmission in the United States	-1	unanswerable	unanswerable	2021
6sqgqttc	6sqgqttc	The outbreak of COVID-19, caused by the SARS-CoV-2 coronavirus, has been declared a pandemic by the World Health Organization (WHO) in March, 2020 and rapidly spread to over 210 countries and territories around the world. By December 24, there are over 77M cumulative confirmed cases with more than 1.72M deaths worldwide. To mathematically describe the dynamic of the COVID-19 pandemic, we propose …	Toward the Impact of Non-pharmaceutical Interventions and Vaccination on the COVID-19 Pandemic With Time-Dependent SEIR Model	-1	unanswerable	unanswerable	2021-03-18 05:00:00
q4jbqsh1	q4jbqsh1	World Health Organization (WHO) has declared COVID-19 a pandemic on March 11, 2020. As of May 23, 2020, according to WHO, there are 213 countries, areas or territories with COVID-19 positive cases. To effectively address this situation, it is imperative to have a clear understanding of the COVID-19 transmission dynamics and to concoct efficient control measures to mitigate/contain the spread. In …	Dynamics and control of COVID-19 pandemic with nonlinear incidence rates	-1	unanswerable	unanswerable	2020-06-25 10:00:00
9xmsu5m9	9xmsu5m9	The current worldwide pandemic produced by coronavirus disease 2019 (COVID-19) has changed the paradigm of mathematical epidemiology due to the high number of unknowns of this new disease. Thus, the empirical approach has emerged as a robust tool to analyze the actual situation carried by the countries and also allows us to predict the incoming scenarios. In this paper, we propose three empirical…	Monitoring and Analysis of COVID-19 Pandemic: The Need for an Empirical Approach	-1	unanswerable	unanswerable	2021-07-08 10:00:00
jikjwrdj	jikjwrdj	India has been the latest global epicenter for COVID-19, a novel coronavirus disease that emerged in China in late 2019. We present a base mathematical model for the transmission dynamics of COVID-19 in India and its neighbour, Pakistan. The base model, which takes the form of a deterministic system of nonlinear differential equations, is parameterized using cumulative COVID-19 mortality data fro…	Dynamics of COVID-19 pandemic in India and Pakistan: A metapopulation modelling approach	-1	unanswerable	unanswerable	2021
utng9v48	utng9v48	BACKGROUND: The isolation of symptomatic cases and tracing of contacts has been used as an early COVID-19 containment measure in many countries, with additional physical distancing measures also introduced as outbreaks have grown. To maintain control of infection while also reducing disruption to populations, there is a need to understand what combination of measures-including novel digital traci…	Effectiveness of isolation, testing, contact tracing, and physical distancing on reducing transmission of SARS-CoV-2 in different settings: a mathematical modelling study	-1	unanswerable	unanswerable	2020
amynknk5	amynknk5	We develop a mathematical model to estimate the effect of New ZealandÃ¢â‚¬â„¢s vaccine rollout on the potential spread and health impacts of COVID-19. The main purpose of this study is to provide a basis for policy advice on border restrictions and control measures in response to outbreaks that may occur during the vaccination roll-out. The model can be used to estimate the theoretical population…	A COVID-19 vaccination model for Aotearoa New Zealand	-1	unanswerable	unanswerable	2022-02-17 05:00:00
4izymiy4	4izymiy4	Population density, behaviour and cultural habits strongly influence the spread of pathogens. Consequently, key epidemiological parameters may vary from country to country. Confirmed COVID-19 cases in in China have been used to estimate those parameters, that vary largely (reviewed in 1). The estimates also depend on testing frequency and case definitions that are prone to change during ongoing e…	Determination of daily reproduction numbers of SARS-CoV2 based on death cases suggests more rapid initial spread in Italy and the United States	-1	unanswerable	unanswerable	2020-03-31 10:00:00
v4mbry22	v4mbry22	As reported by the World Health Organization, a novel coronavirus (2019-nCoV) was identified as the causative virus of Wuhan pneumonia of unknown etiology by Chinese authorities on 7 January, 2020. In this study, we developed a Bats-Hosts-Reservoir-People transmission network model for simulating the potential transmission from the infection source (probable be bats) to the human infection. Since…	A mathematical model for simulating the transmission of Wuhan novel Coronavirus	0	disease name: 2019-nCoV location: - date: - R0 value: - %CI values: - method: Reservoir-People transmission network model.	[{"contribution":{"disease name": "2019-nCoV", "location": "-", "date": "-", "R0 value": "-", "%CI values": "-", "method": "Reservoir-People transmission network model."}}]	2020-01-19 05:00:00
nomcp6no	nomcp6no	The tempo-spatial patterns of Covid-19 infections are a result of nested personal, societal, and political decisions that involve complicated epidemiological dynamics across overlapping spatial scales. High infection "hotspots" interspersed within regions where infections remained sporadic were ubiquitous early in the outbreak, but the spatial signature of the infection evolved to affect most reg…	A kernel-modulated SIR model for Covid-19 contagious spread from county to continent	-1	unanswerable	unanswerable	2021
yk89gmcl	yk89gmcl	34,354,966 active cases and 460,787 deaths because of COVID-19 pandemic were recorded on November 06, 2021, in India. To end this ongoing global COVID-19 pandemic, there is an urgent need to implement multiple population-wide policies like social distancing, testing more people and contact tracing. To predict the course of the pandemic and come up with a strategy to control it effectively, a comp…	Mathematical modeling and optimal intervention strategies of the COVID-19 outbreak	-1	unanswerable	unanswerable	2022-01-30 05:00:00
vvn7sthi	vvn7sthi	BACKGROUND: TG01 is the first cancer immunotherapy targeting KRAS oncogenic mutations. This study assessed the safety and efficacy of TG01/GM-CSF in patients with resected pancreatic adenocarcinoma. METHODS: Patients with stage I or II pancreatic adenocarcinoma who had undergone surgical resection (R0 or R1) received adjuvant gemcitabine with TG01/GM-CSF using two schedules of vaccination. Immune…	TG01/GM-CSF and adjuvant gemcitabine in patients with resected RAS-mutant adenocarcinoma of the pancreas (CT TG01-01): a single-arm, phase 1/2 trial	-1	unanswerable	unanswerable	2020-02-17
i2mafyzi	i2mafyzi	Abstract Introduction: The COVID-19 has emerged as a global concern for public health due to large scale outbreak. The number of confirmed cases has also been increased in India in the past few weeks. The predictions for the COVID-19 can provide insights into the epidemiology of the disease, which helps policymakers to check health system capacities. Methods: We obtained data on daily confirmed, …	COVID-19 in India: Predictions, Reproduction Number and Public Health Preparedness	1	disease name: COVID-19 location: India date: until the end of April R0 value: 2.56 %CI values: - method: mathematical model	[{"contribution":{"disease name": "COVID-19", "location": "India", "date": "until the end of April", "R0 value": "2.56", "%CI values": "-", "method": "mathematical model"}}]	2020-04-14 10:00:00
w502ylcu	w502ylcu	BACKGROUND: Atopic dermatitis is a chronic, inflammatory condition causing a substantial burden to patients and caregivers. SHR0302 is an oral, highly selective, Janus kinase 1 inhibitor under investigation for inflammatory skin diseases. OBJECTIVE: The aim of this study was to investigate the efficacy and safety of SHR0302 in Chinese patients with moderate to severe atopic dermatitis. DESIGN AND…	Efficacy and Safety of SHR0302, a Highly Selective Janus Kinase 1 Inhibitor, in Patients with Moderate to Severe Atopic Dermatitis: A Phase II Randomized Clinical Trial	-1	unanswerable	unanswerable	2021-08-09 10:00:00
75sy3fiz	75sy3fiz	BACKGROUND: With the sensitivity of the polymerase chain reaction test used to detect the presence of the virus in the human host, the worldwide health community has been able to record a large number of the recovered population. OBJECTIVE: The aim of this study was to evaluate the probability of reinfection in the recovered class and the model equations, which exhibits the disease-free equilibri…	Estimation of the Probability of Reinfection With COVID-19 by the Susceptible-Exposed-Infectious-Removed-Undetectable-Susceptible Model	-1	unanswerable	unanswerable	2020		354
jwb9n00x	jwb9n00x	Humoral responses in COVID-19 disease are often of limited durability, as seen with other human coronavirus epidemics. To address the underlying etiology, we examined postmortem thoracic lymph nodes and spleens in acute SARS-CoV-2 infection and observed the absence of germinal centers, a striking reduction in Bcl-6+ germinal center B cells but preservation of AID+ B cells. Absence of germinal cen…	The Loss of Bcl-6 Expressing T Follicular Helper Cells and the Absence of Germinal Centers in COVID-19	-1	unanswerable	unanswerable	2020
1nkoogxn	1nkoogxn	As the novel coronavirus (SARS-CoV-2) continues to spread rapidly across the globe, we aimed to identify and summarize the existing evidence on epidemiological characteristics of SARS-CoV-2 and the effectiveness of control measures to inform policymakers and leaders in formulating management guidelines, and to provide directions for future research. We conducted a systematic review of the publish…	A Systematic Review of COVID-19 Epidemiology Based on Current Evidence	-1	unanswerable	unanswerable	2020
mddbbge4	mddbbge4	The outbreak of COVID-19 was first reported from China, and on 19 February 2020, the first case was confirmed in Qom, Iran. The basic reproduction number (R0 ) of infection is variable in different populations and periods. This study aimed to estimate the R0 of COVID-19 in Qom, Iran, and compare it with that in other countries. For estimation of the serial interval, we used data of the 51 confirm…	Estimation of the serial interval and basic reproduction number of COVID-19 in Qom, Iran, and three other countries: A data-driven analysis in the early phase of the outbreak	1	disease name: COVID-19 location: Qom, Iran date: early phase of the outbreak R0 value: 2 and 3 %CI values: - method: time-varying method | disease name: COVID-19 location: South Korea date: early phase of the outbreak R0 value: 1.5-2 %CI values: - method: time-varying method | disease name: COVID-19 location: Iran date: early phase of the outbreak R0 value: 4-5 %CI values: - method: time-varying …	[{"contribution":{"disease name": "COVID-19", "location": "Qom, Iran", "date": "early phase of the outbreak", "R0 value": "2 and 3", "%CI values": "-", "method": "time-varying method"}},{"contribution":{"disease name": "COVID-19", "location": "South Korea", "date": "early phase of the outbreak", "R0 value": "1.5-2", "%CI values": "-", "method": "time-varying method"}},{"contribution":{"disease na…	2020		7
ktjbgcnw	ktjbgcnw	Since COVID-19 was first identified in December 2019, various public health interventions have been implemented across the world. As different measures are implemented at different countries at different times, we conduct an assessment of the relative effectiveness of the measures implemented in 18 countries and regions using data from 22/01/2020 to 02/04/2020. We compute the top one and two meas…	An Investigation of COVID-19 Spreading Factors with Explainable AI Techniques	-1	unanswerable	unanswerable	2020-05-05 10:00:00
qpcqj2it	qpcqj2it	An outbreak of coronavirus disease began in a large penitentiary complex in Brazil on April 1, 2020. By June 12, there were 1,057 confirmed cases among inmates and staff. Nine patients were hospitalized, and 3 died. Mean serial interval was &#8776;2.5 days; reproduction number range was 1.0-2.3.	COVID-19 Outbreak in a Large Penitentiary Complex, April-June 2020, Brazil	1	disease name: coronavirus disease location: large penitentiary complex in Brazil date: on April 1, 2020. By June 12 R0 value: 1.0-2.3 %CI values: - method: -	[{"contribution":{"disease name": "coronavirus disease", "location": "large penitentiary complex in Brazil", "date": "on April 1, 2020. By June 12", "R0 value": "1.0-2.3", "%CI values": "-", "method": "-"}}]	2021
tm60ejkc	tm60ejkc	OBJECTIVE: The aim of this study was to systematically review and meta-analyze all literature reporting the basic reproductive number (R0), effective reproductive number (Re or Rt), and the serial interval (SI) values of severe acute respiratory syndrome-coronavirus-2 (SARS-CoV-2) infection. SUMMARY BACKGROUND DATA: To assess the rate at which an infectious disease can spread in a population, the…	Meta-Analysis on Serial Intervals and Reproductive Rates for SARS-CoV-2	-1	unanswerable	unanswerable	2020
ozsm5r0m	ozsm5r0m	This study aimed to estimate the basic reproduction number and the time-varying estimate of effective reproductive number of COVID-19 in American countries as they implemented non-pharmacological strategies for the containment of the SARS-CoV-2 virus. Data sources included COVID-19 epidemic data from Johns Hopkins Universityâ€™ data repository and official websites of countries with a relatively …	Estimation of time-varying reproduction numbers of COVID-19 in American countries with regards to non-pharmacological interventions	1	disease name: COVID-19 location: American countries date: - R0 value: - %CI values: - method: maximum likelihood method	[{"contribution":{"disease name": "COVID-19", "location": "American countries", "date": "-", "R0 value": "-", "%CI values": "-", "method": "maximum likelihood method"}}]	2020
m1vtzt07	m1vtzt07	BACKGROUND: Uncertainties surrounding the 2019 novel coronavirus (COVID-19) remain a major global health challenge and requires attention. Researchers and medical experts have made remarkable efforts to reduce the number of cases and prevent future outbreaks through vaccines and other measures. However, there is little evidence on how severe acute respiratory syndrome coronavirus 2 (SARS-CoV-2) i…	Predicting the number of COVID-19 infections and deaths in USA	1	disease name: COVID-19 location: USA date: - R0 value: <1 %CI values: - method: -	[{"contribution":{"disease name": "COVID-19", "location": "USA", "date": "-", "R0 value": "<1", "%CI values": "-", "method": "-"}}]	2022-03-28 10:00:00
v2loylpa	v2loylpa	Background: Amid a critical and emergent situation like the coronavirus disease (COVID-19) pandemic related to extreme health and economic repercussions, we used and presented the mathematical modeling like susceptible-infectious-recovered (SIR) to have a numerical demonstration that can shed light to decide the fate of the scourge in Bangladesh. To describe the idea about the factors influencing…	Prediction of Epidemics Trend of COVID-19 in Bangladesh	1	disease name: COVID-19 location: Bangladesh date: until 31 May 2020 R0 value: 6.924 %CI values: - method: SIR mathematical model	[{"contribution":{"disease name": "COVID-19", "location": "Bangladesh", "date": "until 31 May 2020", "R0 value": "6.924", "%CI values": "-", "method": "SIR mathematical model"}}]	2020
