# Supplementary material
Source: ML conference proceedings conference paper supplement (https://aclanthology.org/2024.findings-eacl.26)
Supplement: note [file train.xlsx]

## Sheet: Sheet1
main_cord_uid	cord_uid	abstract	title	annotator_investigating_R0	text_response	json_response	publish_time	action	cluster_id
djgczg59	djgczg59	A pandemic caused by a new corona virus has spread worldwide, affecting Argentina. We implement an SEIR model to analyze the disease evolution in Buenos Aires and neighboring cities. The model parameters are calibrated using the number of casualties officially reported. Since infinite solutions honor the data, we show different cases. In all of them the reproduction ratio R0 decreases after early…	A Numerical Simulation of the Covid-19 Epidemic in Argentina Using the Seir Model	0	disease name: Covid-19 location: Buenos Aires and neighboring cities date: - R0 value: - %CI values: - method: SEIR model	[{"contribution":{"disease name": "Covid-19", "location": "Buenos Aires and neighboring cities", "date": "-", "R0 value": "-", "%CI values": "-", "method": "SEIR model"}}]	2021
sai7ysuo	sai7ysuo	Background: How can we anticipate the progression of the ongoing pandemic of the coronavirus disease 2019 (COVID-19)? As a measure of transmissibility, we aimed to estimate concurrently the time-varying reproduction number, R0(t), over time during the COVID-19 pandemic for each of the following 12 heavily-attacked countries: Singapore, South Korea, Japan, Iran, Italy, Spain, Germany, France, Belg…	The Estimated Time-Varying Reproduction Numbers during the Ongoing Pandemic of the Coronavirus Disease 2019 (COVID-19) in 12 Selected Countries outside China	1	disease name: coronavirus disease 2019 (COVID-19) location: 12 heavily-attacked countries: Singapore, South Korea, Japan, Iran, Italy, Spain, Germany, France, Belgium, United Kingdom, the United States of America, and South Africa date: January 11, 2020 and May 1, 2020 R0 value: Varies by country %CI values: - method: incidence and EpiEstim packages to the data of daily new confirmed cases for ro…	[{"contribution":{"disease name": "coronavirus disease 2019 (COVID-19)", "location": "12 heavily-attacked countries: Singapore, South Korea, Japan, Iran, Italy, Spain, Germany, France, Belgium, United Kingdom, the United States of America, and South Africa", "date": "January 11, 2020 and May 1, 2020", "R0 value": "Varies by country", "%CI values": "-", "method": "incidence and EpiEstim packages t…	2020-05-14
m633aixq	m633aixq	The SARS-CoV-2 pandemic has transformed the way that the world functions. Health issues and population safety have driven countries' economies to a critical state;therefore, sustaining economic activity while keeping workers safe has become a worldwide goal. In this paper, we present a novel safety protocol based on rapid antibody testing (ABT). Using discrete event simulation, we evaluated its p…	Safer working spaces at coronavirus time: A novel use of antibody tests	-1	unanswerable	unanswerable	2020
o4zs06px	o4zs06px	The quantification of spreading heterogeneity in the COVID-19 epidemic is crucial as it affects the choice of efficient mitigating strategies irrespective of whether its origin is biological or social. We present a method to deduce temporal and individual variations in the basic reproduction number $R$ directly from epidemic trajectories at a community level. Using epidemic data from the 98 distr…	Variability of Individual Infectiousness Derived from Aggregate Statistics of COVID-19	-1	unanswerable	unanswerable	2021-01-15 05:00:00
wor0xxf7	wor0xxf7	a mathematical model depicting the spread of covid-19 epidemic and implementation of population covid-19 intervention in Italy. The model has 8 components leading to system of 8 ordinary differential equations. In this paper, we investigate the model using the concept of fractional differential operator. A numerical method based on the Lagrange polynomial was used to solve the system equations de…	A novel mathematics model of covid-19 with fractional derivative. Stability and numerical analysis	0	disease name: COVID-19 location: Italy date: - R0 value: - %CI values: - method: the next generation matrix, and the Lyapunov	[{"contribution":{"disease name": "COVID-19", "location": "Italy", "date": "-", "R0 value": "-", "%CI values": "-", "method": "the next generation matrix, and the Lyapunov"}}]	2020
u170bj15	u170bj15	Following the rapid dissemination of COVID-19 cases in Switzerland, large-scale non- pharmaceutical interventions (NPIs) were implemented by the cantons and the federal government between February 28 and March 20. Estimates of the impact of these interventions on SARS-CoV-2 transmission are critical for decision making in this and future outbreaks. We here aim to assess the impact of these NPIs o…	Assessing the impact of non-pharmaceutical interventions on SARS-CoV-2 transmission in Switzerland	1	disease name: COVID-19 location: Switzerland date: start of the epidemic R0 value: 3.15 %CI values: 95% CI: 2.13-3.76 method: stochastic transmission model explicitly simulating within hospital dynamics | disease name: COVID-19 location: Switzerland date: March 29-April 5 R0 value: 0.44 %CI values: 95% QR: 0.27-0.65 method: stochastic transmission model explicitly simulating within hospital dynam…	[{"contribution":{"disease name": "COVID-19", "location": "Switzerland", "date": "start of the epidemic", "R0 value": "3.15", "%CI values": "95% CI: 2.13-3.76", "method": "stochastic transmission model explicitly simulating within hospital dynamics"}},{"contribution":{"disease name": "COVID-19", "location": "Switzerland", "date": "March 29-April 5", "R0 value": "0.44", "%CI values": "95% QR: 0.27…	-		1265
frpxd5w6	frpxd5w6	In the absence of vaccines and effective antiviral drugs, control of the spread of coronavirus disease (Covid-19) relies mainly on the adequacy of public health resources and policies. Hence, failure to establish and implement scientifically reliable control measures may have a significant effect on the incidence of severe acute respiratory syndrome coronavirus 2 (SARS-CoV-2) infection, severity …	Transmission of severe acute respiratory syndrome coronavirus 2 through asymptomatic carriers and aerosols: A major public health challenge	-1	unanswerable	unanswerable	2020-12-11
wdj7eafq	wdj7eafq	BACKGROUND: Some clinical features of severe COVID-19 represent blood vessel damage induced by activation of host immune responses initiated by the coronavirus SARS-CoV-2. We hypothesized autoantibodies against angiotensin-converting enzyme 2 (ACE2), the SARS-CoV-2 receptor expressed on vascular endothelium, are generated during COVID-19 and are of mechanistic importance. METHODS: In an opportuni…	IgM anti-ACE2 autoantibodies in severe COVID-19 activate complement and perturb vascular endothelial function	-1	unanswerable	unanswerable	2022-05-09
e0b8gnh8	e0b8gnh8	BACKGROUND: As reported by the World Health Organization, a novel coronavirus (2019-nCoV) was identified as the causative virus of Wuhan pneumonia of unknown etiology by Chinese authorities on 7 January, 2020. The virus was named as severe acute respiratory syndrome coronavirus 2 (SARS-CoV-2) by International Committee on Taxonomy of Viruses on 11 February, 2020. This study aimed to develop a mat…	A mathematical model for simulating the phase-based transmissibility of a novel coronavirus	1	disease name: novel coronavirus (2019-nCoV) location: Wuhan date: 7 January, 2020 R0 value: 2.30 from reservoir to person and 3.58 from person to person %CI values: - method: Reservoir-People (RP) transmission network model	[{"contribution":{"disease name": "novel coronavirus (2019-nCoV)", "location": "Wuhan", "date": "7 January, 2020", "R0 value": "2.30 from reservoir to person and 3.58 from person to person", "%CI values": "-", "method": "Reservoir-People (RP) transmission network model"}}]	2020-02-28
dt0htasb	dt0htasb	BACKGROUND: The widespread pandemic of novel coronavirus disease 2019 (COVID-19) poses an unprecedented global health crisis. In the United States (US), different state governments have adopted various combinations of non-pharmaceutical public health interventions (NPIs), such as non-essential business closures and gathering bans, to mitigate the epidemic from February to April, 2020. Quantitativ…	Differential impact of non-pharmaceutical public health interventions on COVID-19 epidemics in the United States	-1	unanswerable	unanswerable	2021
ftcaed17	ftcaed17	Background: University campuses present an ideal environment for viral spread and are therefore at extreme risk of serving as a hotbed for a COVID-19 outbreak. While active surveillance throughout the semester such as widespread testing, contact tracing, and case isolation, may assist in detecting and preventing early outbreaks, these strategies will not be sufficient should a larger outbreak occ…	Reopening universities during the COVID-19 pandemic: A testing strategy to minimize active cases and delay outbreaks	-1	unanswerable	unanswerable	2020-07-07 10:00:00
dp9x1wft	dp9x1wft	Objective: To infer the start time of the resurgent COVID-19 epidemic in Xinfadi wholesale market in Beijing in June 2020 and evaluate the effect of comprehensive prevention and control measures in this epidemic. Methods: SEIR dynamics model was used to fit daily onset infections to search the start date of this resurgent COVID-19 epidemic in Beijing. The number of cumulative infections from June…	[Inference of start time of resurgent COVID-19 epidemic in Beijing with SEIR dynamics model and evaluation of control measure effect].	1	disease name: COVID-19 location: Beijing date: May 22 and May 28 R0 value: 4.22 %CI values: 95%CI: 2.88-7.02 method: SEIR dynamics model	[{"contribution":{"disease name": "COVID-19", "location": "Beijing", "date": "May 22 and May 28", "R0 value": "4.22", "%CI values": "95%CI: 2.88-7.02", "method": "SEIR dynamics model"}}]	2020-07-31
ivvuiqkp	ivvuiqkp	BACKGROUND: During the Coronavirus Disease 2019 (COVID-19) pandemic, the United Kingdom government imposed public health policies in England to reduce social contacts in hopes of curbing virus transmission. We conducted a repeated cross-sectional study to measure contact patterns weekly from March 2020 to March 2021 to estimate the impact of these policies, covering 3 national lockdowns intersper…	Changes in social contacts in England during the COVID-19 pandemic between March 2020 and March 2021 as measured by the CoMix survey: A repeated cross-sectional study	0	disease name: COVID-19 location: England, United Kingdom date: March 2020 to March 2021 R0 value: - %CI values: - method: calculated the mean daily contacts reported using a (clustered) bootstrap and fitted a censored negative binomial model to estimate age-stratified contact matrices and estimate proportional changes to the basic reproduction number	[{"contribution":{"disease name": "COVID-19", "location": "England, United Kingdom", "date": "March 2020 to March 2021", "R0 value": "-", "%CI values": "-", "method": "calculated the mean daily contacts reported using a (clustered) bootstrap and fitted a censored negative binomial model to estimate age-stratified contact matrices and estimate proportional changes to the basic reproduction number"…	2022-03-01 05:00:00
6hppjkbr	6hppjkbr	Air pollution with particulate matter has been implicated in the incidence and the mortality due to COVID-19 infection. The levels of particulate matter have been shown to have decreased after regional and national lockdowns in a number of countries. COVID-19 possesses an elevated reproduction number (R0) due to its high transmission rate. COVID-19 genes have been found adherent to particulate ma…	Could changes in the airborne pollutant particulate matter acting as a viral vector have exerted selective pressure to cause COVID-19 evolution?	-1	unanswerable	unanswerable	2020
7ogi87ya	7ogi87ya	INTRODUCTION: The impact of the COVID-19 pandemic in the border region is not well-described, including the impact of pandemic-related sleep disturbances on dream experiences, despite frequent reports of meaningful changes to dreams in the population. METHODS: Participants were 155 individuals who completed the Nogales Cardiometabolic Health and Sleep (NOCHES) Study and a COVID sub-study (95% His…	199 COVID-19 Pandemic Sleep and Dreams at the US-Mexico Border	-1	unanswerable	unanswerable	2021-05-03 10:00:00
9lmh0pnj	9lmh0pnj	We scrutinize the evolution of COVID-19 in Madagascar by comparing results from three approaches (cubic polynomial, semi-gaussian and gaussian-like models) which we use to provide an analytical form of the spread of the pandemic. In so doing, we introduce (for the first time) the ratio ÃƒÂ¢Ã‚â€žÃ‚â€ºI/Tc, d of the cumulative and daily numbers of infected persons over the corresponding one of test…	Scrutinizing the spread of COVID-19 in Madagascar	-1	unanswerable	unanswerable	2020
cg7uf35n	cg7uf35n	The Omicron variant of coronavirus has caused major disruptions world-wide with countries struggling to manage the overwhelming number of infections. Omicron is found to be significantly more transmissible compared to its predecessors and therefore almost every impacted country is exhibiting new infection peaks than seen earlier. In this work, we analyze the global statistics of Omicron-impacted …	Omicron Impact in India: An Early Analysis of the Ongoing COVID-19 Third Wave	-1	unanswerable	unanswerable	2022
liarities of quarantine and its violation	liarities of quarantine and its violation	the global number of cases will exceed 20 million. The probabilities of meeting a person spreading the infection and reproduction numbers were calculated for different countries and regions. Conclusions. The SIR model and statistical approach to the parameter identification are helpful to make some reliable estimations of the epidemic waves. The number of persons spreading the infection versus ti…	pandemic waves in Ukraine and in the world will be detected	-1	unanswerable	unanswerable	to predict the medical and economic consequences of the pandemic and to decide which countries' citizens are welcome guests."
armiubyz	armiubyz	A new class of time series models is used to track the progress of the COVID-19 epidemic in the UK in early 2021. Models are fitted to England and the regions, as well as to the UK as a whole. The growth rate of the daily number of cases and the instantaneous reproduction number are computed regularly and compared with those produced by SAGE. The results from figures published each day are compar…	Tracking the Mutant: Forecasting and Nowcasting Covid-19 in the Uk in 2021	-1	unanswerable	unanswerable	2021
u5nhyow9	u5nhyow9	BACKGROUND: Global vaccine development efforts have been accelerated in response to the devastating COVID-19 pandemic. We evaluated the impact of a 2-dose COVID-19 vaccination campaign on reducing incidence, hospitalizations, and deaths in the United States (US). METHODS: We developed an agent-based model of SARS-CoV-2 transmission and parameterized it with US demographics and age-specific COVID-…	The impact of vaccination on COVID-19 outbreaks in the United States	-1	unanswerable	unanswerable	2021
zovatjw0	zovatjw0	BACKGROUND: Social contact surveys can greatly help in quantifying the heterogeneous patterns of infectious disease transmission. The present study aimed to conduct a contact survey in Japan, offering estimates of contact by age and location and validating a social contact matrix using a seroepidemiological dataset of influenza. METHODS: An internet-based questionnaire survey was conducted, cover…	Quantifying heterogeneous contact patterns in Japan: a social contact survey	1	disease name: influenza A (H1N1) 2009 location: Japan date: - R0 value: 1.45 %CI values: (95% confidence interval: 1.42, 1.49). method: the next-generation matrix	[{"contribution":{"disease name": "influenza A (H1N1) 2009", "location": "Japan", "date": "-", "R0 value": "1.45", "%CI values": "(95% confidence interval: 1.42, 1.49).", "method": "the next-generation matrix"}}]	2019-03-20 05:00:00
3uljxsi0	3uljxsi0	Despite large outbreaks in humans seeming improbable for a number of zoonotic pathogens, several pose a concern due to their epidemiological characteristics and evolutionary potential. To enable effective responses to these pathogens in the event that they undergo future emergence, the Coalition for Epidemic Preparedness Innovations is advancing the development of vaccines for several pathogens p…	Projecting vaccine demand and impact for emerging zoonotic pathogens	-1	unanswerable	unanswerable	2021-11-10
e59r9q2v	e59r9q2v	The newest infection is a novel coronavirus named COVID-19, that initially appeared in December 2019, in Wuhan, China, and is still challenging to control . The main focus of this paper is to investigate a novel fractional-order mathematical model that explains the behavior of COVID-19 in Ethiopia. Within the proposed model, the entire population is divided into nine groups, each with its own set…	Modeling and analysis on the transmission of covid-19 Pandemic in Ethiopia	1	disease name: novel coronavirus named COVID-19 location: Ethiopia date: 22 June 2020 to 28 February 2021 R0 value: 1.4575 %CI values: - method: fractional-order mathematical model	[{"contribution":{"disease name": "novel coronavirus named COVID-19", "location": "Ethiopia", "date": "22 June 2020 to 28 February 2021", "R0 value": "1.4575", "%CI values": "-", "method": "fractional-order mathematical model"}}]	2021-11-06
kuf8p4e1	kuf8p4e1	Background: The first case of COVID-19 atypical pneumonia was reported in Wuhan, China on December 1, 2019. Since then, at least 33 other countries have been affected and there is a possibility of a global outbreak. A tremendous amount of effort has been made to understand its transmission dynamics; however, the temporal and spatial transmission heterogeneity and changing epidemiology have been m…	Changing transmission dynamics of COVID-19 in China: a nationwide population-based piecewise mathematical modelling study	1	disease name: COVID-19 location: China (except for Hubei) date: December 1, 2019 - March (end of) R0 value: ranged from 0.98 to 2.74 with an average of 1.79 %CI values: (95% CI 1.77-1.80) method: three-stage continuous-time Susceptible-Exposed-Infectious-Recovered (SEIR) meta-population model	[{"contribution":{"disease name": "COVID-19", "location": "China (except for Hubei)", "date": "December 1, 2019 - March (end of)", "R0 value": "ranged from 0.98 to 2.74 with an average of 1.79", "%CI values": "(95% CI 1.77-1.80)", "method": "three-stage continuous-time Susceptible-Exposed-Infectious-Recovered (SEIR) meta-population model"}}]	43920.4
muysmwy6	muysmwy6	The effective reproduction number $R_t$ measures an infectious disease's transmissibility as the number of secondary infections in one reproduction time in a population having both susceptible and non-susceptible hosts. Current approaches do not quantify the uncertainty correctly in estimating $R_t$, as expected by the observed variability in contagion patterns. We elaborate on the Bayesian estim…	Filtering and improved Uncertainty Quantification in the dynamic estimation of effective reproduction numbers	-1	unanswerable	unanswerable	2020
f6ezu821	f6ezu821	In susceptible-exposed-infectious-recovered (SEIR) epidemic models, with the exponentially distributed duration of exposed/infectious statuses, the mean generation interval (GI, time lag between infections of a primary case and its secondary case) equals the mean latent period (LP) plus the mean infectious period (IP). It was widely reported that the GI for COVID-19 is as short as 5 days. However…	Using proper mean generation intervals in modelling of COVID-19	-1	unanswerable	unanswerable	2021-03-26 05:00:00
wmbfbrd7	wmbfbrd7	Background: COVID-19 developed into a global pandemic in 2020 and poses challenges regarding the prevention and control capabilities of countries. A large number of inbound travelers from other regions could lead to a renewed outbreak of COVID-19 in the local regions. Globally, as a result of the imbalance in the control of the epidemic, all countries are facing the risk of a renewed COVID-19 out…	Impact of the Inflow Population From Outbreak Areas on the COVID-19 Epidemic in Yunnan Province and the Recommended Control Measures: A Preliminary Study	1	disease name: COVID-19 location: Yunnan Province date: 21 January 2020 to 20 February 2020 R0 value: 1.07 %CI values: - method: (SEIR) model analysis	[{"contribution":{"disease name": "COVID-19", "location": "Yunnan Province", "date": "21 January 2020 to 20 February 2020", "R0 value": "1.07", "%CI values": "-", "method": "(SEIR) model analysis"}}]	2020-12-02 05:00:00
8unu5ei6	8unu5ei6	We study the effects of physical distancing measures for the spread of COVID-19 in regional areas within British Columbia, using the reported cases of the five provincial Health Authorities. Building on the Bayesian epidemiological model of Anderson et al. (2020), we propose a hierarchical Bayesian model with time-varying regional parameters to account for the relative reduction in contact due to…	Assessing the effectiveness of regional physical distancing measures of COVID-19 in rural regions of British Columbia	0	disease name: COVID-19 location: rural regions of British Columbia date: March to December of 2020 R0 value: - %CI values: - method: a hierarchical Bayesian model with time-varying regional parameters	[{"contribution":{"disease name": "COVID-19", "location": "rural regions of British Columbia", "date": "March to December of 2020", "R0 value": "-", "%CI values": "-", "method": "a hierarchical Bayesian model with time-varying regional parameters"}}]	2021
ruk1o8kw	ruk1o8kw	We study a multi-group SAIRS-type epidemic model with vaccination. The role of asymptomatic and symptomatic infectious individuals is explicitly considered in the transmission pattern of the disease among the groups in which the population is divided. This is a natural extension of the homogeneous mixing SAIRS model with vaccination studied in Ottaviano et. al (2021). We provide a global stabilit…	Global stability of multi-group SAIRS epidemic models	-1	unanswerable	unanswerable	2022-02-07 05:00:00
85nbr8sv	85nbr8sv	The COVID-19 pandemic caused more than 800,000 infections and 40,000 deaths by the end of March 2020. However, some of the basic epidemiological parameters, such as the exponential epidemic growth rate and R(0) are debated. We developed an inference approach to control for confounding factors in data collection, such as underreporting and changes in surveillance intensities, and fitted a mathemat…	Fast spread of COVID-19 in Europe and the US suggests the necessity of early, strong and comprehensive interventions	1	disease name: COVID-19 location: eight European countries and the US date: End of March 2020 R0 value: between 4.0 and 7.1 %CI values: - method: inference approach to control for confounding factors in data collection, such as underreporting and changes in surveillance intensities, and fitted a mathematical model to infection and death count data	[{"contribution":{"disease name": "COVID-19", "location": "eight European countries and the US", "date": "End of March 2020", "R0 value": "between 4.0 and 7.1", "%CI values": "-", "method": "inference approach to control for confounding factors in data collection, such as underreporting and changes in surveillance intensities, and fitted a mathematical model to infection and death count data"}}]	2020-04-15
gu4hxlbb	gu4hxlbb	Approximately a year into the COVID-19 pandemic caused by the SARS-CoV-2 virus, many countries have seen additional "waves" of infections, especially in the temperate northern hemisphere. Other vulnerable regions, such as South Africa and several parts of South America have also seen cases rise, further impacting local economies and livelihoods. Despite substantial research efforts to date, it re…	Impact of climatic, demographic and disease control factors on the transmission dynamics of COVID-19 in large cities worldwide	0	disease name: COVID-19 location: 359 large cities across the world date: - R0 value: - %CI values: - method: logistic growth curves fitted to cumulative case data	[{"contribution":{"disease name": "COVID-19", "location": "359 large cities across the world", "date": "-", "R0 value": "-", "%CI values": "-", "method": "logistic growth curves fitted to cumulative case data"}}]	2021
jh9cgdn1	jh9cgdn1	BACKGROUND: The emergence of SARS-CoV-2 (ie, COVID-19) has given rise to a global pandemic affecting 215 countries and over 40 million people as of October 2020. Meanwhile, we are also experiencing an infodemic induced by the overabundance of information, some accurate and some inaccurate, spreading rapidly across social media platforms. Social media has arguably shifted the information acquisiti…	Using Tweets to Understand How COVID-19-Related Health Beliefs Are Affected in the Age of Social Media: Twitter Data Analysis Study	-1	unanswerable	unanswerable	2021
qrn08a3e	qrn08a3e	INTRODUCTION: Much attention has been given to stress-related symptoms including insomnia related to the COVID-19 pandemic. Exposure to racially targeted police violence and the disproportionate impact of COVID on their communities have been particularly salient stressors for African Americans. Aims for this presentation are to illuminate the emotional impact of COVID and racism on young adult Af…	700 Young African American Adults Endorse Greater Distress from Racism than COVID though COVID may have Greater Impact on Sleep	-1	unanswerable	unanswerable	2021-05-03 10:00:00
j0iyor8k	j0iyor8k	In this paper, we consider a fractional COVID-19 epidemic model with a convex incidence rate. The AtanganaÃ¢â‚¬â€œBaleanu fractional operator in the Caputo sense is taken into account. We establish the equilibrium points, basic reproduction number, and local stability at both the equilibrium points. The existence and uniqueness of the solution are proved by using Banach and LerayÃ¢â‚¬â€œSchauder …	Fractional optimal control of COVID-19 pandemic model with generalized Mittag-Leffler function	0	disease name: COVID-19 location: - date: - R0 value: - %CI values: - method: -	[{"contribution":{"disease name": "COVID-19", "location": "-", "date": "-", "R0 value": "-", "%CI values": "-", "method": "-"}}]	2021-08-19 10:00:00
6pus1n8p	6pus1n8p	The dynamics of COVID-19 pandemic varies across countries and it is important as researchers to study different kind of phenomena observed at different stages of the waves during the epidemic period. Our interest in this paper is not to model what happened during the endemic state but during the epidemic state. We proposed a continuous formulation of a unique maximum reproduction number estimate …	Maximal reproduction number estimation and identification of transmission rate from the first inflection point of new infectious cases waves: COVID-19 outbreak example	-1	unanswerable	unanswerable	2022-02-25 05:00:00
0jsl03gm	0jsl03gm	Despite the global efforts to mitigate the ongoing COVID-19 pandemic, the disease transmission and the effective controls still remain uncertain as the outcome of the epidemic varies from place to place. In this regard, the province-wise data from Nepal provides a unique opportunity to study the effective control strategies. This is because (a) some provinces of Nepal share an open-border with In…	Inter-provincial disparity of COVID-19 transmission and control in Nepal	1	disease name: COVID-19 location: Nepal date: Mid-June 2020 R0 value: 0.71 to 1.21 %CI values: - method: -	[{"contribution":{"disease name": "COVID-19", "location": "Nepal", "date": "Mid-June 2020", "R0 value": "0.71 to 1.21", "%CI values": "-", "method": "-"}}]	2021
rapu7cho	rapu7cho	The novel coronavirus disease (COVID-19) poses a serious threat to global public health and economics. Serial interval (SI), time between the onset of symptoms of a primary case and a secondary case, is a key epidemiological parameter. We estimated SI of COVID-19 in Shenzhen, China based on 27 records of transmission chains. We adopted three parametric models: Weibull, lognormal and gamma distrib…	Estimating the serial interval of the novel coronavirus disease (COVID-19) based on the public surveillance data in Shenzhen, China, from 19 January to 22 February 2020	1	disease name: novel coronavirus disease (COVID-19) location: Shenzhen, China date: 19 January to 22 February 2020 R0 value: 2.6 %CI values: 95% CI: 2.4-2.8 method: three parametric models: Weibull, lognormal and gamma distributions, and an interval-censored likelihood framework	[{"contribution":{"disease name": "novel coronavirus disease (COVID-19)", "location": "Shenzhen, China", "date": "19 January to 22 February 2020", "R0 value": "2.6", "%CI values": "95% CI: 2.4-2.8", "method": "three parametric models: Weibull, lognormal and gamma distributions, and an interval-censored likelihood framework"}}]	2020
2p3er108	2p3er108	BACKGROUND: As COVID-19 has become a pandemic emerging infectious disease it is important to examine whether there was a spatiotemporal clustering phenomenon in the globe during the rapid spread after the first outbreak reported from southern China. MATERIALS AND METHODS: The open data on the number of COVID-19 cases reported at daily basis form the globe were used to assess the evolution of outb…	Continental transmission of emerging COVID-19 on the 38Ã‚Â° north latitude	1	disease name: COVID-19 location: China date: December 2019 to March 2020 R0 value: 2.84 %CI values: - method: dynamic Susceptible-Infected-Recovered model	[{"contribution":{"disease name": "COVID-19", "location": "China", "date": "December 2019 to March 2020", "R0 value": "2.84", "%CI values": "-", "method": "dynamic Susceptible-Infected-Recovered model"}}]	2021
ybejt2kv	ybejt2kv	The emergence of Covid-19 requires new effective tools for epidemiological surveillance. Spatio-temporal disease mapping models, which allow dealing with highly disaggregated spatial and temporal units of analysis, are a priority in this sense. Spatio-temporal models provide a geographically detailed and temporally updated overview of the current state of the pandemics, making public health inter…	Spatio-temporal small area surveillance of the Covid-19 pandemics	-1	unanswerable	unanswerable	2020
b6r6j1ek	b6r6j1ek	Background: Recent outbreak of a novel coronavirus disease 2019 (COVID-19) in China has led a rapid global spread around the world. For controlling COVID-19 outbreaks, many countries have implemented two non-pharmaceutical interventions: suppression like immediate lockdowns in cities at epicentre of outbreak; or mitigation that slows down but not stopping epidemic for reducing peak healthcare dem…	Feasibility of Controlling COVID-19 Outbreaks in the UK by Rolling Interventions	-1	unanswerable	unanswerable	2020-04-07 10:00:00
ls6zgb75	ls6zgb75	The coronavirus disease 2019 (COVID-19) has grown up to be a pandemic within a short span of time. The quantification of COVID-19 transmissibility is desired for purposes of assessing the potential for a place to start an outbreak and the extent of transmission in the absence of control measures. It is well known that the transmissibility can be measured by reproduction number. For this reason, t…	Base Reproduction Number of COVID-19: Statistic Analysis	1	disease name: coronavirus disease 2019 (COVID-19) location: USA and Wuhan date: - R0 value: USA and Wuhan is about 8.21 and 7.9 %CI values: - method: averaging technique	[{"contribution":{"disease name": "coronavirus disease 2019 (COVID-19)", "location": "USA and Wuhan", "date": "-", "R0 value": "USA and Wuhan is about 8.21 and 7.9", "%CI values": "-", "method": "averaging technique"}}]	44102
o6sqvccr	o6sqvccr	The coronavirus disease 2019 (COVID-19) pandemic is currently the most critical challenge in public health. An understanding of the factors that affect severe acute respiratory syndrome-coronavirus-2 (SARS-CoV-2) infection will help fight the COVID-19 pandemic. This study sought to investigate the association between SARS-CoV-2 infection and blood type distribution. The big data provided by the W…	Association between the dynamics of the COVID-19 epidemic and ABO blood type distribution	0	disease name: COVID-19 location: six countries in each of six geographic zones divided according to the WHO date: - R0 value: - %CI values: - method: -	[{"contribution":{"disease name": "COVID-19", "location": "six countries in each of six geographic zones divided according to the WHO", "date": "-", "R0 value": "-", "%CI values": "-", "method": "-"}}]	2021-01-07 05:00:00
qmrjg59r	qmrjg59r	BACKGROUND: Non-pharmaceutical interventions (NPIs) are used to reduce transmission of SARS coronavirus 2 (SARS-CoV-2) that causes coronavirus disease 2019 (COVID-19). However, empirical evidence of the effectiveness of specific NPIs has been inconsistent. We assessed the effectiveness of NPIs around internal containment and closure, international travel restrictions, economic measures, and healt…	The impact of non-pharmaceutical interventions on SARS-CoV-2 transmission across 130 countries and territories	-1	unanswerable	unanswerable	2021-02-05 05:00:00
crmrqy74	crmrqy74	The basic reproduction number is the average number of people to whom an infected person transmits the infection when virtually all individuals in a population are susceptible. We sought to calculate the current reproduction number for COVID-19 for each state in the United States. For the entire United States, the reproduction number declined from 4.02 to 1.51 between March 17 and April 1, 2020. …	Time-Varying COVID-19 Reproduction Number in the United States	-1	unanswerable	unanswerable	2020-04-15 10:00:00
k5q07y4b	k5q07y4b	Early assessments of the spreading rate of COVID-19 were subject to significant uncertainty, as expected with limited data and difficulties in case ascertainment, but more reliable inferences can now be made. Here, we estimate from European data that COVID-19 cases are expected to double initially every three days, until social distancing interventions slow this growth, and that the impact of suc…	Challenges in control of Covid-19: short doubling time and long delay to effect of interventions	-1	unanswerable	unanswerable	2020-04-15 10:00:00
6x67wlwx	6x67wlwx	Objective: The number of confirmed and suspected cases of the COVID-19 in Hubei province is still increasing. However, the estimations of the basic reproduction number of COVID-19 varied greatly across studies. The objectives of this study are 1) to estimate the basic reproduction number (R(0)) of COVID-19 reflecting the infectiousness of the virus and 2) to assess the effectiveness of a range of…	[Estimating the basic reproduction number of COVID-19 in Wuhan, China]	1	disease name: COVID-19 location: Hubei, China date: January 17 to February 8, 2020 R0 value: 3.49 %CI values: (95%CI: 3.42-3.58) method: the exponential growth (EG) | disease name: COVID-19 location: Hubei, China date: after taking control measures R0 value: 2.95 %CI values: (95%CI: 2.86-3.03) method: the exponential growth (EG)	[{"contribution":{"disease name": "COVID-19", "location": "Hubei, China", "date": "January 17 to February 8, 2020", "R0 value": "3.49", "%CI values": "(95%CI: 3.42-3.58)", "method": "the exponential growth (EG)"}},{"contribution":{"disease name": "COVID-19", "location": "Hubei, China", "date": "after taking control measures", "R0 value": "2.95", "%CI values": "(95%CI: 2.86-3.03)", "method": "the …	2020		388
lc1n8ne0	lc1n8ne0	OBJECTIVES: On March 15, 2020, 61.3% of the confirmed cases of COVID-19 infection in South Korea are associated with the worship service that was organized on February 9 in the Shincheonji Church of Jesus in Daegu. We aim to evaluate the effects of mass infection in South Korea and assess the preventive control intervention. METHOD: Using openly available data of daily cumulative confirmed cases …	Evaluation of COVID-19 epidemic outbreak caused by temporal contact-increase in South Korea	1	disease name: COVID-19 location: South Korea date: - R0 value: 1.77 %CI values: - method: modified susceptible-exposed-infected-recovered-type epidemic model	[{"contribution":{"disease name": "COVID-19", "location": "South Korea", "date": "-", "R0 value": "1.77", "%CI values": "-", "method": "modified susceptible-exposed-infected-recovered-type epidemic model"}}]	2020		345
hpot7mwk	hpot7mwk	BACKGROUND: The coronavirus disease 2019 (COVID-19) epidemic, caused by severe acute respiratory syndrome coronavirus 2 (SARS-CoV-2), began in Wuhan city, Hubei province, in December, 2019, and has spread throughout China. Understanding the evolving epidemiology and transmission dynamics of the outbreak beyond Hubei would provide timely information to guide intervention policy. METHODS: We collec…	Evolving epidemiology and transmission dynamics of coronavirus disease 2019 outside Hubei province, China: a descriptive and modelling study	-1	unanswerable	unanswerable	2020
j4xrqpyn	j4xrqpyn	Vaccines do save lives; however, no vaccine provides complete immunity for all vaccinated individuals. Thus, some individuals remain susceptible to the contagious disease against which they were vaccinated. By relying on the supposed acquired immunity, these individuals can reduce the self-imposed prevention measures and, as a consequence, they can involuntarily promote the spread of the infectio…	A note on the impact of a behavioral side-effect of vaccine failure on the spread of a contagious disease	-1	unanswerable	unanswerable	2021-03-31 10:00:00
k5nx0h1r	k5nx0h1r	Recently, novel coronavirus is a serious global issue and having a negative impact on the economy of the whole world. Like other countries, it also effected the economy and people of Pakistan. According to the publicly reported data, the first case of novel corona virus in Pakistan was reported on 27th February 2020. The aim of the present study is to describe the mathematical model and dynamics …	A report on COVID-19 epidemic in Pakistan using SEIR fractional model	-1	unanswerable	unanswerable	2020
x8xs1iox	x8xs1iox	BACKGROUND: Various non-pharmaceutical interventions (NPIs) such as stay-at-home orders and school closures have been employed to limit the spread of Coronavirus disease (COVID-19). This study measures the impact of social distancing policies on COVID-19 transmission in US states during the early outbreak phase to assess which policies were most effective. METHODS: To measure transmissibility, we…	Policy interventions, social distancing, and SARS-CoV-2 transmission in the United States: a retrospective state-level analysis	-1	unanswerable	unanswerable	2021-01-11 05:00:00
fulwprk5	fulwprk5	The entire world and France were strongly impacted by the SARS-COV-2 epidemic. Finding appropriate measures that effectively contain the spread of the epidemic without putting a too severe pressure on social and economic life is major challenge for modern predictive approaches. To assess the impact of confinement (March 17th till May 11th) and deconfinement, we develop a novel rate model to monit…	Monitoring and predicting SARS-CoV-2 epidemic in France after deconfinement using a multiscale age-stratified rate model	-1	unanswerable	unanswerable	2020-05-19 10:00:00
7n76s3vy	7n76s3vy	Since the start of the SARS-CoV-2 pandemic in late 2019, several variants of concern (VOC) have been reported to have increased transmissibility. In addition, despite the progress of vaccination against SARS-CoV-2 worldwide, all vaccines currently in used are known to protect only partially from infection and onward transmission. We combined phylogenetic analysis with Bayesian inference under an …	SARS-CoV-2 transmissibility compared between variants of concern and vaccination status	-1	unanswerable	unanswerable	2022
scegtg0a	scegtg0a	Mesoamerica and the Caribbean form a region comprised by middle- and low-income countries affected by the COVID-19 pandemic differently. Here, we ask whether the spread of COVID-19, measured using early epidemic growth rates (r), reproduction numbers (R(t)), accumulated cases, and deaths, is influenced by how the Ã¢â‚¬Ëœused territoriesÃ¢â‚¬â„¢ across the regions have been differently shaped by u…	Trade, uneven development and people in motion: Used territories and the initial spread of COVID-19 in Mesoamerica and the Caribbean	-1	unanswerable	unanswerable	2021-09-29 10:00:00
avca9o0p	avca9o0p	To reconstruct the evolutionary dynamics of the 2019 novel-coronavirus recently causing an outbreak in Wuhan, China, 52 SARS-CoV-2 genomes available on 4 February 2020 at Global Initiative on Sharing All Influenza Data were analyzed. The two models used to estimate the reproduction number (coalescent-based exponential growth and a birth-death skyline method) indicated an estimated mean evolutiona…	Early phylogenetic estimate of the effective reproduction number of SARS-CoV-2	-1	unanswerable	unanswerable	2020
zez0b261	zez0b261	Identification of host factors contributing to replication of viruses and resulting disease progression remains a promising approach for development of new therapeutics. Here, we evaluated 6710 clinical and preclinical compounds targeting 2183 host proteins by immunocytofluorescence-based screening to identify SARS-CoV-2 infection inhibitors. Computationally integrating relationships between smal…	Identification of Druggable Host Targets Needed for SARS-CoV-2 Infection by Combined Pharmacological Evaluation and Cellular Network Directed Prioritization Both in vitro and in vivo (preprint)	-1	unanswerable	unanswerable	2022
p3neaa4z	p3neaa4z	Background: Mandatory use of face covering masks (FCM) had been established for children aged six and above in Catalonia (Spain), as one of the non-pharmaceutical interventions aimed at mitigating SARS-CoV-2 transmission within schools. To date, the effectiveness of this mandate has not been well established. The quasi-experimental comparison between 5 year-old children, as a control group, and 6…	Unravelling the Role of the Mandatory Use of Face Covering Masks for the Control of SARS-CoV-2 in Schools: A Quasi-Experimental Study Nested in a Population-Based Cohort in Catalonia (Spain) (preprint)	-1	unanswerable	unanswerable	2022
8qgz934e	8qgz934e	We studied the suitability of commercially available monoclonal antibodies (mAbs) for the immunohistochemical (IHC) detection of severe acute respiratory syndrome coronavirus 2 (SARS-CoV2) in standard archival specimens. Antibodies were screened on HEK293 cells transfected with viral nucleoprotein, S1 subunit and S2 subunit of spike protein and on untransfected cells, as well as a panel of normal…	Identification of Immunohistochemical Reagents for In Situ Protein Expression Analysis of Coronavirus-associated Changes in Human Tissues	-1	unanswerable	unanswerable	2021
hndt7730	hndt7730	In South Korea, the total number of the 2019 novel coronavirus disease (COVID-19) cases is 13,711 including 293 deaths as of July 18, 2020. To examine the change of the growth rate of the outbreak, we present estimates of the transmissibility of COVID-19 in the four most affected regions in the country: Seoul, Gyeonggi Province, Gyeongbuk Province, and Daegu. The daily confirmed COVID-19 cases in…	Regional variability in time-varying transmission potential of COVID-19 in South Korea	-1	unanswerable	unanswerable	2020-07-22 10:00:00
4yrsl4an	4yrsl4an	In this paper, we firstly propose SQIARD and SIARD models to investigate the transmission of COVID-19 with quarantine, infected and asymptomatic infected, and discuss the relation between the respective basic reproduction number $R_0, R_Q$ and the stability of the equilibrium points of model. Secondly, after training the related data parameters, in our numerical simulations, we respectively condu…	The Data Forecast in COVID-19 Model with Applications to US, South Korea, Brazil, India, Russia and Italy	0	disease name: COVID-19 location: US, South Korea, Brazil, India, Russia and Italy date: - R0 value: - %CI values: - method: SQIARD and SIARD models	[{"contribution":{"disease name": "COVID-19", "location": "US, South Korea, Brazil, India, Russia and Italy", "date": "-", "R0 value": "-", "%CI values": "-", "method": "SQIARD and SIARD models"}}]	2021
hk6x6mz8	hk6x6mz8	Hepatitis B virus (HBV) infection remains a worldwide health problem and no eradicative therapy is currently available. Host T cell immune responses have crucial influences on the outcome of HBV infection, however the development of therapeutic vaccines, T cell therapies and the clinical evaluation of HBV-specific T cell responses are hampered markedly by the lack of validated T cell epitopes. Th…	A Systematic Review of T Cell Epitopes Defined from the Proteome of Hepatitis B Virus	-1	unanswerable	unanswerable	2022-02-08 05:00:00
0v51a4f9	0v51a4f9	Using a respiratory virus epidemiological model we derive equations for the critical levels of mask efficiency (fraction blocked) and mask adoption (fraction of population wearing masks) that lower the effective reproduction number to unity. The model extends a basic epidemiological model and assumes that a specified fraction of a population dons masks at a given initial number of infections. The…	Critical levels of mask efficiency and of mask adoption that theoretically extinguish respiratory virus epidemics	-1	unanswerable	unanswerable	2020-05-15 10:00:00
jtmokwgu	jtmokwgu	COVID-19 is an emerging and rapidly evolving pandemic around the world, which causes severe acute respiratory syndrome and results in substantial morbidity and mortality. To examine the transmission dynamics of COVID-19 and its interactions with some exogenous factors such as limited medical resources and false detection problems, we employ a simple epidemiological model and analyse this system u…	Unraveling the Myths of R0 in Controlling the Dynamics of COVID-19 Outbreak: a Modelling Perspective	0	disease name: COVID-19 location: - date: - R0 value: - %CI values: - method: simple epidemiological model and analyse this system using modelling and dynamical systems techniques	[{"contribution":{"disease name": "COVID-19", "location": "-", "date": "-", "R0 value": "-", "%CI values": "-", "method": "simple epidemiological model and analyse this system using modelling and dynamical systems techniques"}}]	2020-04-29 10:00:00
7pkxj2ai	7pkxj2ai	We report an epidemiologic analysis of 4,210 cases of infection with severe acute respiratory syndrome coronavirus 2 and genetic analysis of 313 new near-complete virus genomes in Panama during March 9-April 16, 2020. Although containment measures reduced R0 and Rt, they did not interrupt virus spread in the country.	Early Transmission Dynamics, Spread, and Genomic Characterization of SARS-CoV-2 in Panama	-1	unanswerable	unanswerable	2021
vz7do8us	vz7do8us	We use an age-dependent SIR system of equations to model the evolution of the COVID-19. Parameters that measure the amount of interaction in different locations (home, work, school, other) are approximated from in-sample data using a random optimization scheme, and indicate changes in social distancing along the course of the pandemic. That allows the estimation of the time evolution of classical…	Multi-generational SIR modeling: Determination of parameters, epidemiological forecasting and age-dependent vaccination policies	0	disease name: COVID-19 location: Rio de Janeiro date: - R0 value: - %CI values: - method: age-dependent SIR system	[{"contribution":{"disease name": "COVID-19", "location": "Rio de Janeiro", "date": "-", "R0 value": "-", "%CI values": "-", "method": "age-dependent SIR system"}}]	2021-06-10 10:00:00
pezm1tnw	pezm1tnw	Background In February 2020, a locally-acquired COVID-19 case was detected in Lombardia, Italy. This was the first signal of ongoing transmission of SARS-CoV-2 in the country. The outbreak rapidly escalated to a national level epidemic, amid the WHO declaration of a pandemic. Methods We analysed data from the national case-based integrated surveillance system of all RT-PCR confirmed COVID-19 infe…	Epidemiological characteristics of COVID-19 cases in Italy and estimates of the reproductive numbers one month into the epidemic	1	disease name: COVID-19 location: Toscana, Italy date: as of March 24th 2020 R0 value: 2.5 %CI values: (95%CI: 2.18-2.83) method: - | disease name: COVID-19 location: Lazio, Italy date: as of March 24th 2020 R0 value: 3 %CI values: (95%CI: 2.68-3.33) method: -	[{"contribution":{"disease name": "COVID-19", "location": "Toscana, Italy", "date": "as of March 24th 2020", "R0 value": "2.5", "%CI values": "(95%CI: 2.18-2.83)", "method": "-"}},{"contribution":{"disease name": "COVID-19", "location": "Lazio, Italy", "date": "as of March 24th 2020", "R0 value": "3", "%CI values": "(95%CI: 2.68-3.33)", "method": "-"}}]	2020-04-11 10:00:00		866
1dxp1lcd	1dxp1lcd	Background: In countries with weak surveillance systems, confirmed coronavirus disease 2019 (COVID-19) deaths are likely to underestimate the pandemic's death toll. Many countries also have incomplete vital registration systems, hampering excess mortality estimation. Here, we fitted a dynamic transmission model to satellite imagery data of cemeteries in Mogadishu, Somalia during 2020 to estimate …	Date of introduction and epidemiologic patterns of severe acute respiratory syndrome coronavirus 2 (SARS-CoV-2) in Mogadishu, Somalia: estimates from transmission modelling of satellite-based excess mortality data in 2020.	1	disease name: coronavirus disease 2019 (COVID-19) location: Mogadishu, Somalia date: November-December 2019 R0 value: 1.4-1.7 %CI values: - method: Markov chain Monte Carlo (MCMC) fitting with an age-structured compartmental COVID-19 model	[{"contribution":{"disease name": "coronavirus disease 2019 (COVID-19)", "location": "Mogadishu, Somalia", "date": "November-December 2019", "R0 value": "1.4-1.7", "%CI values": "-", "method": "Markov chain Monte Carlo (MCMC) fitting with an age-structured compartmental COVID-19 model"}}]	2021	keep	641
0daws8oj	0daws8oj	While many epidemiological models were proposed to understand and handle COVID-19, too little has been invested to understand human viral replication and the potential use of novel antivirals to tackle the infection. In this work, using a control theoretical approach, validated mathematical models of SARS-CoV-2 in humans are characterized. A complete analysis of the main dynamic characteristic is…	Characterization of SARS-CoV-2 Dynamics in the Host	0	disease name: SARS-CoV-2 location: - date: - R0 value: - %CI values: - method: a control theoretical approach, validated mathematical models of SARS-CoV-2 in humans are characterized	[{"contribution":{"disease name": "SARS-CoV-2", "location": "-", "date": "-", "R0 value": "-", "%CI values": "-", "method": "a control theoretical approach, validated mathematical models of SARS-CoV-2 in humans are characterized"}}]	2020		454
mfiz5snp	mfiz5snp	The current study identifies the spatial distribution of COVID-19 cases and its association with meteorological and social variables in Punjab (densely populated province of Pakistan). To identify the COVID-19 propagation, the weekly growth, recovery, and deaths rate have also been calculated. The geographic information system (GIS) has used to determine COVID-19 impacts on gender (male/female), …	Prevalence and Associated Risk Factor of COVID-19 and Impacts of Meteorological and Social Variables on Its Propagation in Punjab, Pakistan	0	disease name: COVID-19 location: Punjab, Pakistan date: 11th March to 12th August, 2020 R0 value: - %CI values: - method: -	[{"contribution":{"disease name": "COVID-19", "location": "Punjab, Pakistan", "date": "11th March to 12th August, 2020", "R0 value": "-", "%CI values": "-", "method": "-"}}]	2021-07-07 10:00:00
aoup1qzl	aoup1qzl	In this article, we investigate the importance of demographic and contact patterns in determining the spread of COVID-19 and to the effectiveness of social distancing policies. We investigate these questions proposing an augmented epidemiological model with an age-structured model, with the population divided into susceptible (S), exposed (E), infected and asymptomatic (A), hospitalized (H), infe…	Mathematical Modeling and Investigation on the Role of Demography and Contact Patterns in Social Distancing Measures Effectiveness in COVID-19 Dissemination	1	disease name: COVID-19 location: aged developed country date: - R0 value: 1.74 %CI values: - method: Mathematical modeling and epidemiological model with an age-structured model | disease name: COVID-19 location: least developed country date: - R0 value: 2.00 %CI values: - method: Mathematical modeling and epidemiological model with an age-structured model | disease name: COVID-19 location: devel…	[{"contribution":{"disease name": "COVID-19", "location": "aged developed country", "date": "-", "R0 value": "1.74", "%CI values": "-", "method": "Mathematical modeling and epidemiological model with an age-structured model"}},{"contribution":{"disease name": "COVID-19", "location": "least developed country", "date": "-", "R0 value": "2.00", "%CI values": "-", "method": "Mathematical modeling and…	2022-05-10 10:00:00		507
15yv9z71	15yv9z71	In this work, a mathematical model consisting of a compartmentalized coupled nonlinear system of fractional order differential equations describing the transmission dynamics of COVID-19 is studied. The fractional derivative is taken in the Atangana-Baleanu-Caputo sense. The basic dynamic properties of the fractional model such as invariant region, existence of equilibrium points as well as basic …	A mathematical study on a fractional COVID-19 transmission model within the framework of nonsingular and nonlocal kernel	-1	unanswerable	unanswerable	2021
ykva94qb	ykva94qb	RESUMEN Objetivo Este estudio tiene como primer objetivo: realizar predicciones del curso de la infecciÃƒÂ³n en el horizonte temporal desde marzo 18 a abril 18 del 2020, segÃƒÂºn diferentes medidas de aislamiento aplicadas. Las predicciones incluyen, poblaciÃƒÂ³n total contagiada, mortalidad y necesidad de recursos hospitalarios. Segundo objetivo: modelar la mortalidad y la necesidad de recursos …	Proyecciones de impacto de la pandemia COVID-19 en la poblaciÃƒÂ³n colombiana, segÃƒÂºn medidas de mitigaciÃƒÂ³n: datos preliminares de modelos epidemiolÃƒÂ³gicos para el periodo del 18 de marzo al 18 de abril de 2020/ Impact of the COVID-19 pandemic on the Colombian population according to mitigation measures: preliminary data from epidemiological models for the period March 18 to April 18, 2020	-1	unanswerable	unanswerable	2020
vl3nohyn	vl3nohyn	The continuous mutation of SARS-CoV-2 opens the possibility of the appearance of new variants of the virus with important differences in its spreading characteristics, mortality rates, etc. On 14 December 2020, the United Kingdom reported a potentially more contagious coronavirus variant, present in that country, which is referred to as VOC 202012/01. On 18 December 2020, the South African govern…	Modeling the impact of SARS-CoV-2 variants and vaccines on the spread of COVID-19	-1	unanswerable	unanswerable	2021
w9j17mkc	w9j17mkc	Despite it being over 10 months since COVID-19 was first reported to the world and it having caused over 1.3 million deaths it is still uncertain how the virus can be controlled whilst minimising the negative impacts on society and the economy. On the 14th October England introduced a three-tier system of regional restrictions in an attempt to control the epidemic. This lasted until the 5th Novem…	The effectiveness of the three tier system of local restrictions for control of COVID-19	1	disease name: COVID-19 location: England date: 14th October - 5th November R0 value: 0.9 (tier 3) %CI values: - method: - | disease name: COVID-19 location: England date: 14th October - 5th November R0 value: 1.0 (tier 2) %CI values: - method: - | disease name: COVID-19 location: England date: 14th October - 5th November R0 value: 1.5 (tier 1) %CI values: - method: -	[{"contribution":{"disease name": "COVID-19", "location": "England", "date": "14th October - 5th November", "R0 value": "0.9 (tier 3)", "%CI values": "-", "method": "-"}},{"contribution":{"disease name": "COVID-19", "location": "England", "date": "14th October - 5th November", "R0 value": "1.0 (tier 2)", "%CI values": "-", "method": "-"}},{"contribution":{"disease name": "COVID-19", "location": "…	2020-11-24 05:00:00		760
jrmzuozu	jrmzuozu	Since the outbreak of COVID-19, many COVID-19 research studies have proposed different models for predicting trend of COVID-19. Among them, the prediction model based on mathematical epidemiology (SIR) is the most widely used, but most of these models are adapted in special situations based on various assumptions. In order to reflect the real-time trend of the epidemic in the process of infection…	TW-SIR: Time-window based SIR for COVID-19 forecasts	0	disease name: COVID-19 location: - date: - R0 value: - %CI values: - method: general adapted time- window based SIR model	[{"contribution":{"disease name": "COVID-19", "location": "-", "date": "-", "R0 value": "-", "%CI values": "-", "method": "general adapted time- window based SIR model"}}]	2020
1yf1ae1d	1yf1ae1d	The coronavirus disease 2019 (COVID-19) pandemic is caused by the severe acute respiratory syndrome coronavirus 2 (SARS-CoV-2), which can be transmitted via respiratory secretions. Since there are currently no specific therapeutics or vaccines available against the SARS-CoV-2, the commen nonpharmaceutical interventions (NPIs) are still the main measures to curb the COVID-19 epidemic. Face mask we…	How Efficient Can Non-Professional MasksSuppress COVID-19 Pandemic?	-1	unanswerable	unanswerable	2020-06-03 10:00:00
yxcw10bo	yxcw10bo	We assessed the status of measles elimination in the United States using outbreak notification data. Measles transmissibility was assessed by estimation of the reproduction number, R, the average number of secondary cases per infection, using 4 methods; elimination requires maintaining R at <1. Method 1 estimates R as 1 minus the proportion of cases that are imported. Methods 2 and 3 estimate R b…	Assessment of the Status of Measles Elimination in the United States, 2001Ã¢â‚¬â€œ2014	1	disease name: Measles location: United States date: 2001-2014 R0 value: 0.72 %CI values: (95% confidence interval (CI): 0.68, 0.76) method: Method 1: R as 1 minus the proportion of cases that are imported | disease name: Measles location: United States date: 2001-2014 R0 value: 0.66 %CI values: (95% CI: 0.62, 0.70) method: Method 2: fitting a model of the spread of infection to data on the sizes …	[{"contribution":{"disease name": "Measles", "location": "United States", "date": "2001-2014", "R0 value": "0.72", "%CI values": "(95% confidence interval (CI): 0.68, 0.76)", "method": "Method 1: R as 1 minus the proportion of cases that are imported"}},{"contribution":{"disease name": "Measles", "location": "United States", "date": "2001-2014", "R0 value": "0.66", "%CI values": "(95% CI: 0.62, 0…	2017-04-01 10:00:00		1206
ej1p1p77	ej1p1p77	India is currently experiencing the third wave of COVID-19, which began on around 28 Dec. 2021. Although genome sequencing data of a sufficiently large sample is not yet available, the rapid growth in the daily number of cases, comparable to South Africa, United Kingdom, suggests that the current wave is primarily driven by the Omicron variant. The logarithmic regression suggests the growth rate …	Omicron Impact in India: An Early Analysis of the Ongoing COVID-19 Third Wave	-1	unanswerable	unanswerable	2022-01-10
vl15tihv	vl15tihv	The initial exponential growth rate of an epidemic is an important measure that follows directly from data at hand, commonly used to infer the basic reproduction number. As the growth rates &#955;(t) of tested positive COVID-19 cases have crossed the threshold in many countries, with negative numbers as surrogate for disease transmission deceleration, lockdowns lifting are linked to the behavior …	Reproduction ratio and growth rates: Measures for an unfolding pandemic	0	disease name: COVID-19 location: Basque Country date: - R0 value: - %CI values: - method: wo different data sets, collected and then refined during the COVID-19 responses, are used as an exercise to estimate the momentary growth rates and reproduction numbers	[{"contribution":{"disease name": "COVID-19", "location": "Basque Country", "date": "-", "R0 value": "-", "%CI values": "-", "method": "wo different data sets, collected and then refined during the COVID-19 responses, are used as an exercise to estimate the momentary growth rates and reproduction numbers"}}]	2020
fe0vw9eo	fe0vw9eo	In this paper, we propose a continuous-time stochastic intensity model, namely, two-phase dynamic contagion process(2P-DCP), for modelling the epidemic contagion of COVID-19 and investigating the lockdown effect based on the dynamic contagion model introduced by Dassios and Zhao (2011). It allows randomness to the infectivity of individuals rather than a constant reproduction number as assumed by…	A Two-Phase Dynamic Contagion Model for COVID-19	-1	unanswerable	unanswerable	2020-06-11
ty28m81e	ty28m81e	The reproduction number is broadly considered as a key indicator for the spreading of the COVID-19 pandemic. Its estimated value is a measure of the necessity and, eventually, effectiveness of interventions imposed in various countries. Here we present an online tool for the data-driven inference and quantification of uncertainties for the reproduction number, as well as the time points of interv…	Data-driven inference of the reproduction number for COVID-19 before and after interventions for 51 European countries	0	disease name: COVID-19 location: 51 European countries date: - R0 value: - %CI values: - method: SIR and SEIR models	[{"contribution":{"disease name": "COVID-19", "location": "51 European countries", "date": "-", "R0 value": "-", "%CI values": "-", "method": "SIR and SEIR models"}}]	2020
1t3hg4wi	1t3hg4wi	Since its emergence in 2012, 2,260 cases and 803 deaths due to Middle East respiratory syndrome coronavirus (MERS-CoV) have been reported to the World Health Organization. Most cases were due to transmission in healthcare settings, sometimes causing large outbreaks. We analyzed epidemiologic and clinical data of laboratory-confirmed MERS-CoV cases from eleven healthcare-associated outbreaks in th…	Comparative Analysis of Eleven Healthcare-Associated Outbreaks of Middle East Respiratory Syndrome Coronavirus (Mers-Cov) from 2015 to 2017	1	disease name: MERS-CoV location: Saudi Arabia and the Republic of Korea date: 2015-2017 (At the start of these outbreaks) R0 value: 1.0 to 5.7 %CI values: - method: - | disease name: MERS-CoV location: Saudi Arabia and the Republic of Korea date: 2015-2017 (within 2 to 6 weeks) R0 value: below 1 %CI values: - method: -	[{"contribution":{"disease name": "MERS-CoV", "location": "Saudi Arabia and the Republic of Korea", "date": "2015-2017 (At the start of these outbreaks)", "R0 value": "1.0 to 5.7", "%CI values": "-", "method": "-"}},{"contribution":{"disease name": "MERS-CoV", "location": "Saudi Arabia and the Republic of Korea", "date": "2015-2017 (within 2 to 6 weeks)", "R0 value": "below 1", "%CI values": "-",…	43599.4		1226
obre5jar	obre5jar	The study was aimed to introduce a new model construction regarding the transmission of Coronavirus Disease (henceforth, COVID-19) in human population. The mathematical model was constructed by taking into consideration several epidemiology parameters that are closely identical with the real condition. The study further conducted an analysis on the model by identifying the endemicity parameters o…	Sensitivity Analysis Of Mathematical Model Of Coronavirus Disease (COVID-19) Transmission	-1	unanswerable	unanswerable	2020
02avx47f	02avx47f	As of the end of November, 2021, the rate of completion for second-dose COVID-19 vaccine administration was almost 80% in Japan. We evaluated waning COVID-19 vaccine effectiveness in Japan, controlling for mutated strains, the Olympic Games, and countermeasures. The effective reproduction number R(t) was regressed on current vaccine coverage and data of a certain number of days prior, as well as …	Waning COVID-19 vaccine effectiveness in Japan	-1	unanswerable	unanswerable	2022
osz2hk56	osz2hk56	OBJECTIVES: Importations of novel variants of concern (VOC), particularly B.1.617.2, have become the impetus behind recent outbreaks of SARS-CoV-2. Concerns around the impact on vaccine effectiveness, transmissibility and severity are now driving the public health response to these variants. This paper analyses the patterns of growth in hospitalisations and confirmed cases for novel VOCs by age g…	Growth, reproduction numbers and factors affecting the spread of SARS-CoV-2 novel variants of concern in the UK from October 2020 to July 2021: a modelling analysis	-1	unanswerable	unanswerable	2021-11-24 05:00:00
mo71hyr7	mo71hyr7	Coronavirus disease 2019 (COVID-19) emerged in Wuhan, China in 2019, has spread throughout the world and has since then been declared a pandemic. As a result, COVID-19 has caused a major threat to global public health. In this paper, we use mathematical modeling to analyze the reported data of COVID-19 cases in Vietnam and study the impact of non-pharmaceutical interventions. To achieve this, two…	Mathematical Modeling Predicts That Strict Social Distancing Measures Would Be Needed to Shorten the Duration of Waves of COVID-19 Infections in Vietnam	0	disease name: COVID-19 location: urban areas of Vietnam date: - R0 value: - %CI values: - method: susceptible-exposed-infectious-recovered (SEIR)	[{"contribution":{"disease name": "COVID-19", "location": "urban areas of Vietnam", "date": "-", "R0 value": "-", "%CI values": "-", "method": "susceptible-exposed-infectious-recovered (SEIR)"}}]	2021-01-12 05:00:00
tme9675v	tme9675v	Undoubtedly, COVID-19 pandemic is one of the largest pandemics and one of the biggest international challenges for health-care system of various countries in the world. This is a narrative review study based on the studies published related with different aspects of COVID-19. The highest numbers of active cases are in the USA, Brazil, India, Russia, South Africa, as well as Colombia and the disea…	Aspects of Epidemiology, Pathology, Virology, Immunology, Transmission, Prevention, Prognosis, Diagnosis, and Treatment of COVID-19 Pandemic: A Narrative Review	-1	unanswerable	unanswerable	2021-05-15 10:00:00
trdd70if	trdd70if	Mycobacterium tuberculosis infection features various disease outcomes: clearance, latency, active disease, and latent tuberculosis infection (LTBI) reactivation. Identifying the decisive factors for disease outcomes and progression is crucial to elucidate the macrophages-tuberculosis interaction and provide insights into therapeutic strategies. To achieve this goal, we first model the disease pr…	An investigation of tuberculosis progression revealing the role of macrophages apoptosis via sensitivity and bifurcation analysis	-1	unanswerable	unanswerable	2021-08-26
ycgu4jf8	ycgu4jf8	The reproduction number is an indicator of the evolution of an epidemic.Consequently, accurate estimators for this number are essential for decision making in politics. Many estimators use filtered data as input to compensate for fluctuations of reported cases. However, for daily-based estimations, this filtering leads to delays. Some approaches use small window sizes for filtering to overcome th…	Delay-robust Estimation of the Reproduction Number and Comparative Evaluation on Generated Synthetic Data	-1	unanswerable	unanswerable	2020-11-30
dv44aodo	dv44aodo	BackgroundMitochondrial DNA (MT-DNA) are intrinsically inflammatory nucleic acids released by damaged solid organs. Whether circulating cell-free MT-DNA quantitation could be used to predict the risk of poor COVID-19 outcomes remains undetermined.MethodsWe measured circulating MT-DNA levels in prospectively collected, cell-free plasma samples from 97 subjects with COVID-19 at hospital presentatio…	Circulating mitochondrial DNA is an early indicator of severe illness and mortality from COVID-19	-1	unanswerable	unanswerable	2021
11rqo0n8	11rqo0n8	BACKGROUND: Response to the unprecedented COVID-19 outbreak needs to be augmented in Texas, USA, where the first 5 cases were reported on March 6, 2020, were rapidly followed by an exponential rise within the next few weeks. This study aimed to determine the ongoing trend and upcoming infection status of COVID-19 in county levels of Texas. METHODS: Data were extracted from the following sources: …	Mathematical Modeling and Covid-19 Forecast in Texas, USA: a prediction model analysis and the probability of disease outbreak	1	disease name: COVID-19 location: Texas, USA date: by January 31, 2021 R0 value: 2.65 %CI values: - method: Four-compartment Susceptible-Exposed-Infectious-Removal (SEIR) mathematical model	[{"contribution":{"disease name": "COVID-19", "location": "Texas, USA", "date": "by January 31, 2021", "R0 value": "2.65", "%CI values": "-", "method": "Four-compartment Susceptible-Exposed-Infectious-Removal (SEIR) mathematical model"}}]	2021
x72hpw9c	x72hpw9c	Objective: Early identification of the basic reproduction number (BRN) is imperative to political decision making during an epidemic. In this study, we estimated the BRN 7, 14, 21 and 28 days after societal lockdown of Denmark during the early stage of the COVID-19 epidemic. Method: We implemented the SEIR dynamical system for disease spread without vital dynamics. The BRN was modulated using a s…	The basic reproduction number can be accurately estimated within 14 days after societal lockdown: The early stage of the COVID-19 epidemic in Denmark	1	disease name: COVID-19 location: Denmark date: at day 7 following lockdown during the early stage of the COVID-19 epidemic R0 value: 0.95 %CI values: (95% PI: 0.92-0.98) method: simulated annealing Monte Carlo algorithm | disease name: COVID-19 location: Denmark date: at day 28 following lockdown during the early stage of the COVID-19 epidemic R0 value: 0.92 %CI values: (95% PI: 0.92-0.93) method…	[{"contribution":{"disease name": "COVID-19", "location": "Denmark", "date": "at day 7 following lockdown during the early stage of the COVID-19 epidemic", "R0 value": "0.95", "%CI values": "(95% PI: 0.92-0.98)", "method": "simulated annealing Monte Carlo algorithm"}},{"contribution":{"disease name": "COVID-19", "location": "Denmark", "date": "at day 28 following lockdown during the early stage o…	2020-08-16 10:00:00		328
pg4sa09g	pg4sa09g	We model and calculate the fraction of infected population necessary for herd immunity to occur, taking into account the heterogeneity in infectiousness and susceptibility, as well as the correlation between the two parameters. We show that these cause the reproduction number to decrease with progression, and consequently have a drastic effect on the estimate of the necessary percentage of the po…	Heterogeneity and Superspreading Effect on Herd Immunity	-1	unanswerable	unanswerable	2020-09-01 10:00:00
oomqqtii	oomqqtii	Many studies have proposed a relationship between COVID-19 transmissibility and ambient pollution levels. However, a major limitation in establishing such associations is to adequately account for complex disease dynamics, influenced by e.g. significant differences in control measures and testing policies. Another difficulty is appropriately controlling the effects of other potentially important …	PM(2.5) as a major predictor of COVID-19 basic reproduction number in the USA	0	disease name: COVID-19 location: USA states date: - R0 value: - %CI values: - method: non-linear dynamics methods	[{"contribution":{"disease name": "COVID-19", "location": "USA states", "date": "-", "R0 value": "-", "%CI values": "-", "method": "non-linear dynamics methods"}}]	2021-06-24 10:00:00
wvbidnty	wvbidnty	To control and contain the outbreaks of emerging infectious diseases such as COVID-19, it is important to know how easy and fast they transmit among people. To explore the essential information of the novel infectious agents, people always confront an inverse problem: using (partially) observed numbers of infected people by time and region to dig up the underlying characteristics of unknown infec…	Modelling and Estimating the Transmissibility of COVID-19: Transmission Dynamics in Shaanxi Province of China as a Case Study	1	disease name: COVID-19 location: Shaanxi Province of China date: - R0 value: range from 0.46 to 0.61 %CI values: - method: infectious disease dynamics method	[{"contribution":{"disease name": "COVID-19", "location": "Shaanxi Province of China", "date": "-", "R0 value": "range from 0.46 to 0.61", "%CI values": "-", "method": "infectious disease dynamics method"}}]	2020
tq1z6e2b	tq1z6e2b	BACKGROUND: With an estimated basic reproductive number of 3.77, the Coronavirus Disease 2019 (COVID-19) continues to spread. It is urgent to exert adequate efforts for the management of dialysis patients, caregivers, and healthcare personnel (HCP). This study aimed at reporting practical workflow, identification of high-risk or suspected cases of CO-VID-19, and subsequent response measures. METH…	Infection Control Precautions and Care Delivery in Hemodialysis Unit during Coronavirus Disease 2019 Outbreak: A Case Series	-1	unanswerable	unanswerable	2020
wiogaezh	wiogaezh	After the blockade that many nations suffered to stop the growth of the incidence curve of COVID-19 during the first half of 2020, they face the challenge of resuming their social and economic activity. The rapid airborne transmissibility of SARS-CoV-2, and the absence of a vaccine, calls for active containment measures to avoid the propagation of transmission chains. The best strategy up to date…	Virus spread versus contact tracing: two competing contagion processes	-1	unanswerable	unanswerable	2021
o7qdi1fp	o7qdi1fp	We developed a simple mathematical model to describe criminality and the justice system composed of the police investigation and court trial. The model assessed two features of organized crime -- the cost-benefit analysis done by the crime-susceptible to commit a crime and the whistleblowing of the law offenders. The model was formulated considering the mass action law commonly used in the diseas…	A model-based assessment of the cost-benefit balance and the plea bargain in criminality -- A qualitative case study of the Covid-19 epidemic shedding light on the"car wash operation"in Brazil	-1	unanswerable	unanswerable	2022-01-09 05:00:00
ehp59yst	ehp59yst	On March 11, 2020, Italy imposed a national lockdown to curtail the spread of severe acute respiratory syndrome coronavirus 2. We estimate that, 14 days after lockdown, the net reproduction number had dropped below 1 and remained stable at Ã‚Â¼0.76 (95% CI 0.67-0.85) in all regions for >3 of the following weeks.	Impact of a Nationwide Lockdown on SARS-CoV-2 Transmissibility, Italy	-1	unanswerable	unanswerable	2021
t9dk3ez3	t9dk3ez3	Global and national surveillance of SARS-CoV-2 epidemiology is mostly based on targeted schemes focused on testing individuals with symptoms. These tested groups are often unrepresentative of the wider population and exhibit test positivity rates that are biased upwards compared with the true population prevalence. Such data are routinely used to infer infection prevalence and the effective repro…	Improving local prevalence estimates of SARS-CoV-2 infections using a causal debiasing framework	-1	unanswerable	unanswerable	2021-12-31 05:00:00
ucgngii4	ucgngii4	Background: The re-emerging outbreak of COVID-19 in Beijing China in summer of 2020 was originated from a contaminated super food wholesale market. The transmission mechanism was analyzed. Methods: We hypothesized that the Xinfadi outbreak was associated with activities of food-trade. Therefore, all the confirmed cases were divided into groups of sellers, buyer, seller transmitted and buyer trans…	The Food-Trade Associated Spreading of COVID-19 Outbreak from a Contaminated Super Wholesale Food Market in Beijing	-1	unanswerable	unanswerable	2020
5xtc2odp	5xtc2odp	ABSTRACT Background: Qatar has a population of 2.8 million, over half of whom are expatriate craft and manual workers (CMW). We aimed to characterize the severe acute respiratory syndrome coronavirus 2 (SARS-CoV-2) epidemic in Qatar. Methods: A series of epidemiologic studies were conducted including analysis of the national SARS-CoV-2 PCR testing and hospitalization database, community surveys a…	Characterizing the Qatar advanced-phase SARS-CoV-2 epidemic	1	disease name: SARS-CoV-2 location: Qatar date: - R0 value: 1.45-1.68 %CI values: - method: series of epidemiologic studies	[{"contribution":{"disease name": "SARS-CoV-2", "location": "Qatar", "date": "-", "R0 value": "1.45-1.68", "%CI values": "-", "method": "series of epidemiologic studies"}}]	2020-07-19 10:00:00
wh1ad3sy	wh1ad3sy	The outbreak of coronavirus disease-2019 (COVID-19) impacts public health dramatically around the world. The demographic characteristics, exposure history, dates of illness onset and dates of confirmed diagnosis were collected from the data of 24 family clusters from Beijing. The characteristics of the cases and the estimated key epidemiologic time-to-event distributions were described. The basic…	Transmission dynamics of COVID-19 among index case family clusters in Beijing, China	1	disease name: COVID-19 location: Beijing, China date: - R0 value: 2.06 %CI values: (95% CI 2.02-2.08) method: -	[{"contribution":{"disease name": "COVID-19", "location": "Beijing, China", "date": "-", "R0 value": "2.06", "%CI values": "(95% CI 2.02-2.08)", "method": "-"}}]	2020-01-19 05:00:00
l17y7cdo	l17y7cdo	BACKGROUND: Zika virus (ZIKV) transmission has been reported in 67 countries/territories in the Oceania region and the Americas since 2015, prompting the World Health Organization (WHO) to declare ZIKV as a Public Health Emergency of International Concern in February 2016, due to its strong association with medical complications such as microcephaly and GuillainÃ¢â‚¬â€œBarrÃƒÂ© Syndrome (GBS). Ho…	Temporal patterns and geographic heterogeneity of Zika virus (ZIKV) outbreaks in French Polynesia and Central America	1	disease name: Zika virus (ZIKV) location: Colombia, Guatemala and Suriname, all land-based populations date: - R0 value: between 1.05 and 1.75 %CI values: - method: phenomenological model , Richards model | disease name: Zika virus (ZIKV) location: island populations in French Polynesia, Puerto Rico and Saint Martin date: - R0 value: 5.70-6.89 %CI values: - method: phenomenological model , Richar…	[{"contribution":{"disease name": "Zika virus (ZIKV)", "location": "Colombia, Guatemala and Suriname, all land-based populations", "date": "-", "R0 value": "between 1.05 and 1.75", "%CI values": "-", "method": "phenomenological model , Richards model"}},{"contribution":{"disease name": "Zika virus (ZIKV)", "location": "island populations in French Polynesia, Puerto Rico and Saint Martin", "date":…	42815.2		1197
l58p2bod	l58p2bod	We proposed a delay differential model, associated with the response time for individuals to the current infection, to examine the media impact on the transmission dynamics of infectious diseases. We investigated the global bifurcation by considering the delay as a bifurcation parameter and examined the onset and termination of Hopf bifurcations from a positive equilibrium. Numerical studies to i…	Global hopf bifurcation of a delayed equation describing the lag effect of media impact on the spread of infectious disease.	1	disease name: 2009 A/H1N1 pandemic influenza location: Shaanxi province, China date: - R0 value: 1.79 %CI values: [95% CI (1.77-1.80)] method: delay differential model	[{"contribution":{"disease name": "2009 A/H1N1 pandemic influenza", "location": "Shaanxi province, China", "date": "-", "R0 value": "1.79", "%CI values": "[95% CI (1.77-1.80)]", "method": "delay differential model"}}]	2018
zymh8c6w	zymh8c6w	In 2014Ã¢â‚¬â€œ2016, Guinea, Sierra Leone and Liberia in West Africa experienced the largest and longest Ebola epidemic since the discovery of the virus in 1976. During the epidemic, incidence data were collected and published at increasing resolution. To monitor the epidemic as it spread within and between districts, we develop an analysis method that exploits the full spatiotemporal resolution …	Spatiotemporal Analysis of the 2014 Ebola Epidemic in West Africa	-1	unanswerable	unanswerable	2016-12-08
nx4ftdbk	nx4ftdbk	Novel Coronavirus is a highly infectious disease, with over one million confirmed cases and thousands of deaths recorded. The disease has become pandemic, affecting almost all nations of the world, and has caused enormous economic, social and psychological burden on countries. Hygiene and educational campaign programmes have been identified to be potent public health interventions that can curtai…	Dynamic model of COVID-19 disease with exploratory data analysis	-1	unanswerable	unanswerable	2020-07-11 10:00:00
yithhv1i	yithhv1i	Estimation of the effective reproductive number Rt is important for detecting changes in disease transmission over time. During the Coronavirus Disease 2019 (COVID-19) pandemic, policy makers and public health officials are using Rt to assess the effectiveness of interventions and to inform policy. However, estimation of Rt from available data presents several challenges, with critical implicatio…	Practical considerations for measuring the effective reproductive number, Rt	-1	unanswerable	unanswerable	2020
3mjb2wvr	3mjb2wvr	Background: India was one of the countries to institute strict measures for Severe acute respiratory syndrome coronavirus 2 (SARS-CoV-2) control in the early phase. Since, then, the epidemic growth trajectory was slow before registering an explosion of cases due to local cluster transmissions. Methods: We estimated the growth rate and doubling time of SARS-CoV-2 for India and high burden states u…	Epidemic Landscape and Forecasting of SARS-CoV-2 in India	1	disease name: SARS-CoV-2 location: India date: mid-July to early August 2020 R0 value: 1.43 to 1.85 %CI values: - method: modified standard Susceptible-Infectious-Recovered (SIR) models to SIR/Death (SIRD) model to accommodate deaths using R0 with the sequential Bayesian method for simulation in SIRD models	[{"contribution":{"disease name": "SARS-CoV-2", "location": "India", "date": "mid-July to early August 2020", "R0 value": "1.43 to 1.85", "%CI values": "-", "method": "modified standard Susceptible-Infectious-Recovered (SIR) models to SIR/Death (SIRD) model to accommodate deaths using R0 with the sequential Bayesian method for simulation in SIRD models"}}]	2021-03-03		1409
epjk1b1h	epjk1b1h	How to strategically allocate the available vaccines is a crucial issue for pandemic control. In this work, we propose a mathematical framework for optimal stabilizing vaccine allocation, where our goal is to send the infections to zero as soon as possible with a fixed number of vaccine doses. This framework allows us to efficiently compute the optimal vaccine allocation policy for general epidem…	Optimal Vaccine Allocation for Pandemic Stabilization	-1	unanswerable	unanswerable	2021
w0ax8xa8	w0ax8xa8	OBJECTIVES: Nosocomial infection is an ongoing concern in the COVID-19 outbreak. The effective screening of suspected cases in the healthcare setting is therefore necessary, enabling the early identification and prompt isolation of cases for epidemic containment. We aimed to assess the cost and health outcomes of an extended screening strategy, implemented in Singapore on 07 February 2020, which …	The costs of an expanded screening criteria for COVID-19: A modelling study	-1	unanswerable	unanswerable	2020
shet005i	shet005i	In the absence of other tools, monitoring the effects of protective measures, including social distancing and forecasting the outcome of outbreaks is of immense interest. Real-time data is noisy and very often hampered by systematic errors in reporting. Detailed epidemic models may contain a large number of empirical parameters, which cannot be determined with sufficient accuracy. In this paper, …	Forecasting the outcome and estimating the epidemic model parameters from the fatality time series in COVID-19 outbreaks	-1	unanswerable	unanswerable	2020
oi3dwucc	oi3dwucc	Super-spreading events in an outbreak can change the nature of an epidemic. Therefore, it is useful for public health teams to determine whether an ongoing outbreak has any contribution from such events, which may be amenable to interventions. We estimated the basic reproductive number (R0) and the dispersion factor (k) from empirical data on clusters of epidemiologically linked coronavirus disea…	Inferring super-spreading from transmission clusters of COVID-19 in Hong Kong, Japan, and Singapore	0	disease name: COVID-19 location: Hong Kong date: - R0 value: - %CI values: - method: - | disease name: COVID-19 location: Japan date: - R0 value: - %CI values: - method: - | disease name: COVID-19 location: Singapore date: - R0 value: - %CI values: - method: -	[{"contribution":{"disease name": "COVID-19", "location": "Hong Kong", "date": "-", "R0 value": "-", "%CI values": "-", "method": "-"}},{"contribution":{"disease name": "COVID-19", "location": "Japan", "date": "-", "R0 value": "-", "%CI values": "-", "method": "-"}},{"contribution":{"disease name": "COVID-19", "location": "Singapore", "date": "-", "R0 value": "-", "%CI values": "-", "method": "-"…	2020		519
7giu152z	7giu152z	Recently, four new strains of SARS-COV-2 were reported in different countries which are mutants and considered as 70 % more dangerous than the existing covid-19 virus. In this paper, hybrid mathematical models of new strains and co-infection in Caputo, Caputo-Fabrizio, and Atangana-Baleanu are presented. The idea behind this co-infection modeling is that, as per medical reports, both dengue and c…	Modeling, analysis and prediction of new variants of covid-19 and dengue co-infection on complex network	0	disease name: both dengue and covid-19 location: Caputo, Caputo-Fabrizio, and Atangana-Baleanu date: - R0 value: - %CI values: - method: The qualitative study via stability analysis is discussed at equilibria and reproduction number R 0 is computed. For the numerical purpose, Adams-Bashforth-Moulton and Newton methods are employed to obtain the approximate solutions of the proposed model	[{"contribution":{"disease name": "both dengue and covid-19", "location": "Caputo, Caputo-Fabrizio, and Atangana-Baleanu", "date": "-", "R0 value": "-", "%CI values": "-", "method": "The qualitative study via stability analysis is discussed at equilibria and reproduction number R 0 is computed. For the numerical purpose, Adams-Bashforth-Moulton and Newton methods are employed to obtain the approx…	2021
hbiopq2a	hbiopq2a	We updated a published mathematical model of SARS-CoV-2 transmission with laboratory-derived source and wearer protection efficacy estimates for a variety of face masks to estimate their impact on COVID-19 incidence and related mortality in the United States. When used at already-observed population rates of 80% for those [Ã¢â€°Â¥]65 years and 60% for those <65 years, face masks are associated wi…	Evaluation of Different Types of Face Masks to Limit the Spread of SARS CoV 2, A Modeling Study	-1	unanswerable	unanswerable	2021-04-27 10:00:00
4vgbzcx8	4vgbzcx8	We consider the pandemic spreading of COVID-19 for some selected countries after the outbreak of the coronavirus in Wuhan City, China. We estimated the infection rate and the initial infected individuals of COVID-19 by using the officially reported data at the early stage of the epidemic for the susceptible (S), infectable (I), quarantined (Q), and the cofirmed recovered (Rk) population model, so…	Estimation of Infection Rate and Prediction of Initial Infected Individuals of COVID-19	1	disease name: COVID-19 location: - date: Early stage of the epidemic R0 value: the range between 1.8 and 3.5 %CI values: - method: SIQRk model	[{"contribution":{"disease name": "COVID-19", "location": "-", "date": "Early stage of the epidemic", "R0 value": "the range between 1.8 and 3.5", "%CI values": "-", "method": "SIQRk model"}}]	2020-04-27
dutdxsox	dutdxsox	This study investigates the possibility to contain COVID-19 contagion in indoor environments via increasing ventilation rates obtained through high energy efficiency systems combining thermal recovery by heat exchanger and thermodynamic recovery by heat pump. The starting point of this assessment is a procedure to evaluate in naturally ventilated environments, the current infectious risk by using…	High energy efficiency ventilation to limit COVID-19 contagion in school environments	1	disease name: COVID-19 location: typical school environments in Italy date: - R0 value: up to exceed 13 %CI values: - method: procedure to evaluate in naturally ventilated environments, the current infectious risk by using measurements of indoor/outdoor CO2 concentrations to calculate actual air changes per hour	[{"contribution":{"disease name": "COVID-19", "location": "typical school environments in Italy", "date": "-", "R0 value": "up to exceed 13", "%CI values": "-", "method": "procedure to evaluate in naturally ventilated environments, the current infectious risk by using measurements of indoor/outdoor CO2 concentrations to calculate actual air changes per hour"}}]	2021
b0haj0az	b0haj0az	Vaccination strategies to control COVID-19 have been ongoing worldwide since the end of 2020. Understanding their possible effect is key to prevent future disease spread. Using a modelling approach, this study intends to measure the impact of the COVID-19 Portuguese vaccination strategy on the effective reproduction number and explore three scenarios for vaccine effectiveness waning. Namely, the …	Measuring the impact of COVID-19 vaccination and immunity waning: a modelling study for Portugal	-1	unanswerable	unanswerable	2021
urm2tgq1	urm2tgq1	The rapid increase in clinical cases of the new coronavirus disease, COVID-19, suggests high transmissibility. However, the estimates of the basic reproductive number reported in the literature vary widely. Considering this, we drew the function of contact-rate reduction required to control the transmission from both detectable and undetectable sources. Based on this, we offer a set of recommenda…	Translating transmissibility measures into recommendations for coronavirus prevention	-1	unanswerable	unanswerable	2020
zoasm15u	zoasm15u	Background: To control the COVIDÃ¢Ë†â€™19 outbreak in Japan, sports and entertainment events were canceled throughout Japan for two weeks from February 26 through March 19. That policy has been designated as voluntary event cancellation (VECSC). Object: This study assesses the VECSC effectiveness using predicted outcomes. Method: A simple susceptibleÃ¢Ë†â€™infectedÃ¢Ë†â€™recovery model was applie…	Effect of voluntary event cancellation and school closure as countermeasures against COVID-19 outbreak in Japan	1	disease name: COVID-19 location: Japan date: during January 14 through March 25 R0 value: 1.992 %CI values: [1.892, 2.088] method: simple susceptible-infected-recovery model	[{"contribution":{"disease name": "COVID-19", "location": "Japan", "date": "during January 14 through March 25", "R0 value": "1.992", "%CI values": "[1.892, 2.088]", "method": "simple susceptible-infected-recovery model"}}]	2020-03-23	keep	1119
m8zvj5fr	m8zvj5fr	A mathematical model was developed to evaluate and compare the effects and intensity of the Coronavirus disease 2019 prevention and control measures in Chinese provinces. The time course of the disease with government intervention was described using a dynamic model. The estimated government intervention parameters and area difference between with and without intervention were considered as the i…	Comparative and quantitative analysis of COVID-19 epidemic interventions in Chinese provinces	-1	unanswerable	unanswerable	2021
o5b6ptsi	o5b6ptsi	As COVID-19 cases continue to rise globally, many researchers have developed mathematical models to help capture the dynamics of the spread of COVID-19. Specifically, the compartmental SEIR model and its variations have been widely employed. These models differ in the type of compartments included, nature of the transmission rates, seasonality, and several other factors. Yet, while the spread of …	Mathematical modeling, analysis, and simulation of the COVID-19 pandemic with explicit and implicit behavioral changes	0	disease name: COVID-19 location: globally date: - R0 value: - %CI values: - method: Next Generation Matrix method	[{"contribution":{"disease name": "COVID-19", "location": "globally", "date": "-", "R0 value": "-", "%CI values": "-", "method": "Next Generation Matrix method"}}]	2020
gbn4b9tw	gbn4b9tw	As college campuses reopened in fall 2020, we saw a large-scale experiment unfold on the efficacy of various strategies to contain the SARS-CoV-2 virus. Traditional individual surveillance testing via nasal swabs and/or saliva is among the measures that colleges are pursuing to reduce the spread of the virus on campus. Additionally, some colleges are testing wastewater on their campuses for signs…	Evaluating the sensitivity of SARS-CoV-2 infection rates on college campuses to wastewater surveillance	-1	unanswerable	unanswerable	2021-09-21 10:00:00
yle9zfey	yle9zfey	In this paper, we propose a mathematical model for analyzing and predicting the number of confirmed cases of COVID-19. Our model is a time-dependent susceptible-infected-recovered (SIR) model that tracks two time series: (i) the transmission rate at time $t$ and (ii) the recovering rate at time $t$. Our time-dependent SIR method is better than the traditional static SIR model as it can adapt to t…	A Time-dependent SIR model for COVID-19	-1	unanswerable	unanswerable	2020-02-28 05:00:00
yuiivakf	yuiivakf	BACKGROUND: Existing literatures demonstrated that meteorological factors could be of importance in affecting the spread patterns of the respiratory infectious diseases. However, how ambient temperature may influence the transmissibility of COVID-19 remains unclear. OBJECTIVES: We explore the association between ambient temperature and transmissibility of COVID-19 in different regions across Chin…	Could the ambient higher temperature decrease the transmissibility of COVID-19 in China?	-1	unanswerable	unanswerable	2020-12-03 05:00:00		456
ztc5holk	ztc5holk	BACKGROUND: In order to compare the transmissibility of the 2009 pH1N1 pandemic during successive waves of infections in summer and fall/winter in the Northern Hemisphere, and to assess the temporal changes during the course of the outbreak in relation to the intervention measures implemented, we analyze the epidemiological patterns of the epidemic in Taiwan during July 2009-March 2010. METHODS: …	Transmissibility and temporal changes of 2009 pH1N1 pandemic during summer and fall/winter waves	1	disease name: 2009 pH1N1 location: Taiwan date: July 2009-March 2010 (for the first wave) R0 value: 1.04-1.27 %CI values: - method: multi-phase Richards model | disease name: 2009 pH1N1 location: Taiwan date: July 2009-March 2010 (for the second wave) R0 value: 1.01-1.05 %CI values: - method: multi-phase Richards model	[{"contribution":{"disease name": "2009 pH1N1", "location": "Taiwan", "date": "July 2009-March 2010 (for the first wave)", "R0 value": "1.04-1.27", "%CI values": "-", "method": "multi-phase Richards model"}},{"contribution":{"disease name": "2009 pH1N1", "location": "Taiwan", "date": "July 2009-March 2010 (for the second wave)", "R0 value": "1.01-1.05", "%CI values": "-", "method": "multi-phase R…	40879.2		1175
r0at2hut	r0at2hut	By March 31, 2020, COVID-19 had spread to more than 200 countries. Over 750,000 confirmed cases were reported, leading to more than 36,000 deaths. In this study, we analysed the efficiency of various intervention strategies to prevent infection by the virus, SARS-CoV-2, using an agent-based SEIIR model, in the fully urbanised city of Shenzhen, Guangdong Province, China. Shortening the duration fr…	Impact of intervention methods on COVID-19 transmission in Shenzhen	-1	unanswerable	unanswerable	2020
9yzum3er	9yzum3er	The Ebola virus disease (EVD) epidemic in West Africa in 2013Ã¢â‚¬â€œ2015 spread heterogeneously across the three hardest-hit countries Guinea, Liberia and Sierra Leone and the estimation of national transmission of EVD provides little information about local dynamics. To investigate district-level transmissibility of EVD, we applied a statistical modelling approach to estimate the basic reproduc…	Heterogeneity in District-Level Transmission of Ebola Virus Disease during the 2013-2015 Epidemic in West Africa	1	disease name: Ebola virus disease (EVD) location: Guinea date: 2013-2015 R0 value: 0.97 %CI values: (95% CI 0.77-1.18) method: statistical modelling approach | disease name: Ebola virus disease (EVD) location: Liberia date: 2013-2015 R0 value: 1.26 %CI values: (95% CI 0.98-1.55) method: statistical modelling approach | disease name: Ebola virus disease (EVD) location: Sierra Leone date: 2013-2015…	[{"contribution":{"disease name": "Ebola virus disease (EVD)", "location": "Guinea", "date": "2013-2015", "R0 value": "0.97", "%CI values": "(95% CI 0.77-1.18)", "method": "statistical modelling approach"}},{"contribution":{"disease name": "Ebola virus disease (EVD)", "location": "Liberia", "date": "2013-2015", "R0 value": "1.26", "%CI values": "(95% CI 0.98-1.55)", "method": "statistical modelli…	2016-07-19 10:00:00		1188
gc0szicq	gc0szicq	Abstract: In this article, we formulated a mathematical model for the spread of the COVID-19 disease and we introduced quarantined and isolated compartments. The next generation matrix method was adopted to compute the basic reproduction number in order to assess the transmission dynamics of the COVID-19 deadly disease. Stability analysis of the disease free equilibrium is investigated based on t…	Mathematical Analysis of COVID-19 Transmission Dynamics. A Case Study with Nigeria	0	disease name: COVID-19 location: Nigeria date: - R0 value: - %CI values: - method: The next generation matrix	[{"contribution":{"disease name": "COVID-19", "location": "Nigeria", "date": "-", "R0 value": "-", "%CI values": "-", "method": "The next generation matrix"}}]	2020-10-23 10:00:00
0gbjl8wp	0gbjl8wp	The novel of COVID-19 disease started in late 2019 making the worldwide governments came across a high number of critical and death cases, beyond constant fear of the collapse in their health systems. Since the beginning of the pandemic, researchers and authorities are mainly concerned with carrying out quantitative studies (modeling and predictions) overcoming the scarcity of tests that lead us …	Bayesian modeling of COVID-19 cases with a correction to account for under-reported cases	0	disease name: COVID-19 location: Brazil date: - R0 value: - %CI values: - method: a Bayesian approach to the SIR model with correction for under-reporting in the analysis of COVID-19 cases in Brazil	[{"contribution":{"disease name": "COVID-19", "location": "Brazil", "date": "-", "R0 value": "-", "%CI values": "-", "method": "a Bayesian approach to the SIR model with correction for under-reporting in the analysis of COVID-19 cases in Brazil"}}]	2020
acrxl5bq	acrxl5bq	In the present paper, we formulate a new mathematical model for the dynamics of COVID-19 with quarantine and isolation. Initially, we provide a brief discussion on the model formulation and provide relevant mathematical results. Then, we consider the fractal-fractional derivative in Atangana-Baleanu sense, and we also generalize the model. The generalized model is used to obtain its stability res…	The dynamics of COVID-19 with quarantined and isolation.	1	disease name: COVID-19 location: China date: January 11 till April 9, 2020 R0 value: 6.6361 %CI values: - method: fractal-fractional derivative in Atangana-Baleanu sense	[{"contribution":{"disease name": "COVID-19", "location": "China", "date": "January 11 till April 9, 2020", "R0 value": "6.6361", "%CI values": "-", "method": "fractal-fractional derivative in Atangana-Baleanu sense"}}]	2020
uazqkay9	uazqkay9	There is conflicting evidence on the influence of weather on COVID-19 transmission. Our aim is to estimate weather-dependent signatures in the early phase of the pandemic, while controlling for socio-economic factors and non-pharmaceutical interventions. We identify a modest non-linear association between mean temperature and the effective reproduction number (R(e)) in 409 cities in 26 countries,…	A cross-sectional analysis of meteorological factors and SARS-CoV-2 transmission in 409 cities across 26 countries	-1	unanswerable	unanswerable	2021-10-13 10:00:00
3l2sedxc	3l2sedxc	This paper focuses on the dynamics of the COVID-19 pandemic and estimation of associated real-time variables characterizing disease spread. A nonlinear dynamic model is developed which enhances the traditional SEIR epidemic model to include additional variables of hospitalizations, ICU admissions, and deaths. A 6-month data set containing Minnesota data on infections, hospital-ICU admissions and …	Estimation of the Basic Reproduction Number for the COVID-19 Pandemic in Minnesota	0	disease name: COVID-19 location: Minnesota date: 6-month data set R0 value: - %CI values: - method: Nonlinear dynamic model, SEIR epidemic model, cascaded observer	[{"contribution":{"disease name": "COVID-19", "location": "Minnesota", "date": "6-month data set", "R0 value": "-", "%CI values": "-", "method": "Nonlinear dynamic model, SEIR epidemic model, cascaded observer"}}]	2021-12-31 05:00:00
sxi6c3rt	sxi6c3rt	Human interaction and behavior were proven to be decisive factors for disease spread among the members of a community. Recent events, determined by the COVID-19 outbreak, forced us to develop methods of control, in order to lower the reproductive number and overall, reduce the number of cases. We propose a software simulation method centered on in what manner a virus spreads inside a closed space…	Simulating the Evolution of Infectious Agents Through Human Interaction	-1	unanswerable	unanswerable	2020
97vfgg3q	97vfgg3q	Background: In the era of social distancing to curb the spread of COVID-19, bubbling is the combining of two or more households to create an exclusive larger group. The impact of bubbling on COVID-19 transmission is challenging to quantify because of the complex social structures involved. Methods: We developed a network description of households in the UK, using the configuration model to link h…	Household bubbles and COVID-19 transmission: insights from percolation theory	-1	unanswerable	unanswerable	2020-12-18 05:00:00		319
kw8j8ksy	kw8j8ksy	Following the rapid dissemination of COVID-19 cases in Colombia in 2020, large-scale non-pharmaceutical interventions (NPIs) were implemented as national emergencies in most of the municipalities of the country starting by a lockdown on March 20th of 2020. Using combinations of meta-population models SEAIIRD (Susceptible-Exposed-Asymptomatic-Infected-Recovered-Diseased) which describes the diseas…	Estimating and forecasting the burden and spread of SARS-CoV2 first wave in Colombia.	-1	unanswerable	unanswerable	2021-01-15 05:00:00
q8stbf8n	q8stbf8n	A mathematical model was developed describing the dynamic of the COVID-19 virus over a population considering that the infected can either be symptomatic or not. The model was calibrated using data on the confirmed cases and death from several countries like France, Philippines, Italy, Spain, United Kingdom, China, and the USA. First, we derived the basic reproduction number, R0, and estimated th…	Accounting for symptomatic and asymptomatic in a SEIR-type model of COVID-19	0	disease name: COVID-19 location: several countries date: - R0 value: - %CI values: - method: mathematical model | disease name: COVID-19 location: France date: - R0 value: - %CI values: - method: mathematical model | disease name: COVID-19 location: Philippines date: - R0 value: - %CI values: - method: mathematical model | disease name: COVID-19 location: Italy date: - R0 value: - %CI values: - m…	[{"contribution":{"disease name": "COVID-19", "location": "several countries", "date": "-", "R0 value": "-", "%CI values": "-", "method": "mathematical model"}},{"contribution":{"disease name": "COVID-19", "location": "France", "date": "-", "R0 value": "-", "%CI values": "-", "method": "mathematical model"}},{"contribution":{"disease name": "COVID-19", "location": "Philippines", "date": "-", "R0 …	2020		551
ik9xp5qf	ik9xp5qf	First identified in Wuhan, China, in December 2019, a novel coronavirus (SARS-CoV-2) has affected over 16,800,000 people worldwide as of July 29, 2020 and was declared a pandemic by the World Health Organization on March 11, 2020. Influenza studies have shown that influenza viruses survive longer on surfaces or in droplets in cold and dry air, thus increasing the likelihood of subsequent transmis…	The role of environmental factors on transmission rates of the COVID-19 outbreak: an initial assessment in two spatial scales	-1	unanswerable	unanswerable	2020
r9djydgi	r9djydgi	Model-based epidemiological assessment is useful to support decision-making at the beginning of an emerging Aedes-transmitted outbreak. However, early forecasts are generally unreliable as little information is available in the first few incidence data points. Here, we show how past Aedes-transmitted epidemics help improve these predictions. The approach was applied to the 2015Ã¢â‚¬â€œ2017 Zika v…	Improving early epidemiological assessment of emerging Aedes-transmitted epidemics using historical data	-1	unanswerable	unanswerable	2018-06-04
uxq43me8	uxq43me8	Our ability to respond appropriately to infectious diseases is enhanced by identifying differences in the potential for transmitting infection between individuals. Here, we identify epidemiological traits of self-limited infections (i.e. infections with an effective reproduction number satisfying [Image: see text]) that correlate with transmissibility. Our analysis is based on a branching process…	Detecting Differential Transmissibilities That Affect the Size of Self-Limited Outbreaks	-1	unanswerable	unanswerable	2014-10-30 05:00:00
ml3vrg35	ml3vrg35	The coronavirus disease 2019 (COVID-19) has resulted in an ongoing pandemic worldwide. Countries have adopted non-pharmaceutical interventions (NPI) to slow down the spread. This study proposes an agent-based model that simulates the spread of COVID-19 among the inhabitants of a city. The agent-based model can be accommodated for any location by integrating parameters specific to the city. The si…	An Agent-Based Modeling of COVID-19: Validation, Analysis, and Recommendations	-1	unanswerable	unanswerable	2021
hehn2o6q	hehn2o6q	Covid-19 is a recently-emerged infectious disease caused by the novel severe acute respiratory syndrome coronavirus SARS-CoV2. SARS-CoV2 differs from previous coronavirus infections (SARS and MERS) due to its high infectivity (reproduction value, R0, typically 2-4) and pre- or asymptomatic transmission, properties that have contributed to the current global Covid-19 pandemic. Identified risk fact…	Covid-19 and Diabetes: A Complex Bidirectional Relationship	-1	unanswerable	unanswerable	2020
54tep5pb	54tep5pb	BackgroundSuperspreading infections play an important role in the SARS-CoV-2 pandemic. Superspreading is caused primarily by heterogeneity in social contact rates, and therefore represents an opportunity for targeting surveillance and control via consideration of social network topologies, particularly in resource-limited settings. Yet, it remains unclear how to implement such surveillance and co…	Targeting SARS-CoV-2 superspreading infections could dramatically improve the efficiency of epidemic control strategies in resource-limited contexts	-1	unanswerable	unanswerable	2022
us3t4yqz	us3t4yqz	The SIQR model is exploited to analyze the outbreak of COVID-19 in Japan where the number of the daily confirmed new cases is explicitly treated as an observable. It is assumed that the society consists of four compartments; susceptible individuals (S), infected individuals at large (I), quarantined patients (Q) and recovered individuals (R), and the time evolution of the pandemic is described by…	Analysis of the outbreak of COVID-19 in Japan by SIQR model	-1	unanswerable	unanswerable	2020
2cmk4jqm	2cmk4jqm	PURPOSE: SARS-CoV-2 is a recently emerged ÃƒÅ¸-coronavirus. Here we present the current knowledge on its epidemiologic features. METHODS: Non-systematic review. RESULTS: SARS-CoV-2 replicates in the upper and lower respiratory tract. It is mainly transmitted by droplets and aerosols from asymptomatic and symptomatic infected subjects. The consensus estimate for the basis reproduction number (R(0)…	Epidemiology of SARS-CoV-2	-1	unanswerable	unanswerable	2020-10-08 10:00:00
1cmoc2i4	1cmoc2i4	Mexico has experienced one of the highest COVID-19 mortality rates in the world. A delayed implementation of social distancing interventions in late March 2020 and a phased reopening of the country in June 2020 has facilitated sustained disease transmission in the region. In this study we systematically generate and compare 30-day ahead forecasts using previously validated growth models based on …	Transmission dynamics and forecasts of the COVID-19 pandemic in Mexico, March-December 2020	-1	unanswerable	unanswerable	2021-07-21 10:00:00
j53d8ewt	j53d8ewt	2As COVID-19 vaccine research efforts seem to be yielding the first tangible results, the proportion of individuals needed to reap the benefits of herd immunity is a key element from a Public Health programs perspective. This magnitude, termed the critical immunization threshold (q), can be obtained from the classical SIR model equilibrium equation, equaling (1 - 1/R0)/ {epsilon}, where R0 is the…	COVID-19 immunization threshold(s): an analysis	-1	unanswerable	unanswerable	2021
elatvjj4	elatvjj4	By 21 May 2020, severe acute respiratory syndrome-coronavirus-2 (SARS-CoV-2) had caused more than 5 million cases of coronavirus 2019 (COVID-19) across more than 200 countries. Most countries with significant outbreaks have introduced social distancing or "lockdown" measures to reduce viral transmission. So the key question now is when, how and to what extent these measures can be lifted.Publicly…	Estimates of the ongoing need for social distancing and control measures post-"lockdown" from trajectories of COVID-19 cases and mortality	1	disease name: COVID-19 location: the countries with the largest number of cases available for analysis (USA, Italy, Spain, France and UK) date: up to 21 May 2020 (before lockdown) R0 value: 2.0 and 3.7 %CI values: - method: regression models | disease name: COVID-19 location: France date: up to 21 May 2020 (under the control measures) R0 value: 0.76 %CI values: (95% CI 0.72-0.82) method: regressi…	[{"contribution":{"disease name": "COVID-19", "location": "the countries with the largest number of cases available for analysis (USA, Italy, Spain, France and UK)", "date": "up to 21 May 2020 (before lockdown)", "R0 value": "2.0 and 3.7", "%CI values": "-", "method": "regression models"}},{"contribution":{"disease name": "COVID-19", "location": "France", "date": "up to 21 May 2020 (under the con…	2020		31
cxxvkbiq	cxxvkbiq	BACKGROUND & OBJECTIVES: A significant number of reported COVID-19 cases can be traced back to superspreader events (SSEs), where a disproportionally large number of secondary cases relative to the standard reproductive rate, R0, are initiated. Although a superspreader is an individual who undergoes more viral shedding and transmission than others, it appears likely that environmental factors hav…	SARS-CoV-2 (COVID-19) superspreader events	-1	unanswerable	unanswerable	2020
5pzaozvr	5pzaozvr	Vigorous non-pharmaceutical interventions have largely suppressed the COVID-19 outbreak in Wuhan, China. We extended the susceptible-exposed-infectious-recovered model to study the transmission dynamics and evaluate the impact of interventions using 32,583 laboratory-confirmed cases from December 8, 2019 till March 8, 2020, accounting for presymptomatic infectiousness, and time-varying ascertainm…	Full-spectrum dynamics of the coronavirus disease outbreak in Wuhan, China: a modeling study of 32,583 laboratory-confirmed cases	1	disease name: COVID-19 location: Wuhan, China date: December 8, 2019 till March 8, 2020 R0 value: 0.27 %CI values: (0.23-0.32) method: extended susceptible-exposed-infectious-recovered model	[{"contribution":{"disease name": "COVID-19", "location": "Wuhan, China", "date": "December 8, 2019 till March 8, 2020", "R0 value": "0.27", "%CI values": "(0.23-0.32)", "method": "extended susceptible-exposed-infectious-recovered model"}}]	2020-05-04 10:00:00
40xpx6ej	40xpx6ej	OBJECTIVES: During the 6 months since the first coronavirus disease 2019 (COVID-19) patient was diagnosed in Korea on January 20, 2020, various prevention and control measures have been implemented according to the COVID-19 epidemic pattern. Therefore, this study aimed to estimate the reproductive numbers (R) for each epidemic stage to analyze the effects of the preventive measures and to predict…	Analyzing the effects of social distancing on the COVID-19 pandemic in Korea using mathematical modeling	1	disease name: COVID-19 location: Korea date: February 18, 2020 - February 28, 2020 R0 value: 3.53 %CI values: - method: deterministic mathematical model | disease name: COVID-19 location: Korea date: March 14, 2020 - April 29, 2020 R0 value: 0.45 %CI values: - method: deterministic mathematical model | disease name: COVID-19 location: Korea date: April 30, 2020 - May 13, 2020 R0 value: 2.69 %CI v…	[{"contribution":{"disease name": "COVID-19", "location": "Korea", "date": "February 18, 2020 - February 28, 2020", "R0 value": "3.53", "%CI values": "-", "method": "deterministic mathematical model"}},{"contribution":{"disease name": "COVID-19", "location": "Korea", "date": "March 14, 2020 - April 29, 2020", "R0 value": "0.45", "%CI values": "-", "method": "deterministic mathematical model"}},{"…	2020-09-07 10:00:00		937
jofj39xe	jofj39xe	OBJECTIVES: The outbreak of novel coronavirus (COVID-19) epidemic is reaching its final phase in China. The complete epidemic data are available for a complete assessment of epidemiological parameters in all regions and time periods. METHODS: This study aims to present a spatiotemporal epidemic model based on spatially stratified heterogeneity (SSH) to simulate the epidemic spread. A susceptible-…	Modeling the complete spatiotemporal spread of the COVID-19 epidemic in mainland China	1	disease name: novel coronavirus (COVID-19) location: China date: January 20th, 2020 R0 value: an initial value between 2 and 3.5 %CI values: - method: susceptible-exposed/latent-infected-removed (SEIR) model	[{"contribution":{"disease name": "novel coronavirus (COVID-19)", "location": "China", "date": "January 20th, 2020", "R0 value": "an initial value between 2 and 3.5", "%CI values": "-", "method": "susceptible-exposed/latent-infected-removed (SEIR) model"}}]	2021
sk9lud0o	sk9lud0o	The basic reproduction number, R(0), a summary measure of the transmission potential of an infectious disease, is estimated from early epidemic growth rate, but a likelihood-based method for the estimation has yet to be developed. The present study corrects the concept of the actual reproduction number, offering a simple framework for estimating R(0) without assuming exponential growth of cases. …	Correcting the Actual Reproduction Number: A Simple Method to Estimate R(0) from Early Epidemic Growth Data	1	disease name: HIV location: European countries date: - R0 value: 3.60 to 3.74 %CI values: - method: simple framework for estimating R(0) without assuming exponential growth of cases	[{"contribution":{"disease name": "HIV", "location": "European countries", "date": "-", "R0 value": "3.60 to 3.74", "%CI values": "-", "method": "simple framework for estimating R(0) without assuming exponential growth of cases"}}]	2010-01-21 05:00:00
96wkqutc	96wkqutc	The outbreak of novel coronavirus (COVID-19) has the potential for global spread, infecting large numbers in all countries. In this case, estimating the country-specific basic reproductive ratio is a vital first step in public-health planning. The basic reproductive ratio (R0) is determined by both the nature of pathogen and the network of contacts through which the disease can spread - with this…	Estimation of country-level basic reproductive ratios for novel Coronavirus (COVID-19) using synthetic contact matrices	1	disease name: COVID-19 location: Eastern Europe and Japan date: - R0 value: Highest %CI values: - method: synthetic contact matrices | disease name: COVID-19 location: Africa, Central America and South-Western Asia date: - R0 value: lowest %CI values: - method: synthetic contact matrices	[{"contribution":{"disease name": "COVID-19", "location": "Eastern Europe and Japan", "date": "-", "R0 value": "Highest", "%CI values": "-", "method": "synthetic contact matrices"}},{"contribution":{"disease name": "COVID-19", "location": "Africa, Central America and South-Western Asia", "date": "-", "R0 value": "lowest", "%CI values": "-", "method": "synthetic contact matrices"}}]	2020-02-27 05:00:00		826
pnqia21v	pnqia21v	With the rapid spread of the SARS-CoV-2 virus since the end of 2019, public health confinement measures to contain the propagation of the pandemic have been implemented. Our method to estimate the reproduction number using Bayesian inference with time-dependent priors enhances previous approaches by considering a dynamic prior continuously updated as restrictive measures and comportments within t…	Adaptive Time-Dependent Priors and Bayesian Inference to Evaluate SARS-CoV-2 Public Health Measures Validated on 31 Countries	-1	unanswerable	unanswerable	2020
8iwcwts1	8iwcwts1	India imposed one of the worldÃ¢â‚¬â„¢s strictest population-wide lockdown on 25 March 2020 for COVID-19. We estimated epidemiological parameters, evaluated the effect of control measures on the epidemic in India and explored strategies to exit lockdown. We obtained patient-level data to estimate the delay from onset to confirmation and the asymptomatic proportion. We estimated the basic and time…	Transmission dynamics of the COVID-19 epidemic in India and modelling optimal lockdown exit strategies	1	disease name: COVID-19 location: India date: 4 March to 25 April 2020 R0 value: 2·08 %CI values: - method: SEIR-QDPA model	[{"contribution":{"disease name": "COVID-19", "location": "India", "date": "4 March to 25 April 2020", "R0 value": "2·08", "%CI values": "-", "method": "SEIR-QDPA model"}}]	2020-12-03
3g2us5zh	3g2us5zh	The main goal of this paper is to develop the forward and inverse modeling of the Coronavirus (COVID-19) pandemic using novel computational methodologies in order to accurately estimate and predict the pandemic. This leads to governmental decisions support in implementing effective protective measures and prevention of new outbreaks. To this end, we use the logistic equation and the SIR system of…	Uncertainty Quantification in Epidemiological Models for COVID-19 Pandemic	0	disease name: COVID-19 location: Austria date: - R0 value: - %CI values: - method: adaptive Markov-chain Monte-Carlo (MCMC) algorithm	[{"contribution":{"disease name": "COVID-19", "location": "Austria", "date": "-", "R0 value": "-", "%CI values": "-", "method": "adaptive Markov-chain Monte-Carlo (MCMC) algorithm"}}]	2020-06-03 10:00:00
yo147o8u	yo147o8u	The coronavirus infectious disease (COVID-19) is a novel respiratory disease reported in 2019 in China. The infection is very destructive to human lives and caused millions of deaths. Various approaches have been made recently to understand the complex dynamics of COVID-19. The mathematical modeling approach is one of the considerable tools to study the disease spreading pattern. In this article,…	Numerical simulation of a Caputo fractional epidemic model for the novel coronavirus with the impact of environmental transmission	-1	unanswerable	unanswerable	2021-10-11 10:00:00
r1rxmdzj	r1rxmdzj	OBJECTIVES: We study the effect of the coronavirus disease 2019 (COVID-19) in India and model the epidemic to guide those involved in formulating policy and building health-care capacity. METHODS: This effect is studied using the Susceptible-Exposed-Infected-Recovered (SEIR) compartmental model. We estimate the infection rate using a least square method with Poisson noise and calculate the reprod…	Prediction of the Peak, Effect of Intervention, and Total Infected by COVID-19 in India	1	disease name: coronavirus disease 2019 (COVID-19) location: India date: August 9, 2020 R0 value: 2.70 %CI values: - method: Susceptible-Exposed-Infected-Recovered (SEIR) compartmental model	[{"contribution":{"disease name": "coronavirus disease 2019 (COVID-19)", "location": "India", "date": "August 9, 2020", "R0 value": "2.70", "%CI values": "-", "method": "Susceptible-Exposed-Infected-Recovered (SEIR) compartmental model"}}]	2020
gl6p0p1q	gl6p0p1q	BACKGROUND: Estimates of seroprevalence to SARS-CoV-2 vary widely and may influence vaccination response. We ascertained IgG levels across a single US metropolitan site, Chicago, from June 2020 through December 2020. METHODS: Participants (n = 7935) were recruited through electronic advertising and received materials for a self-sampled dried-blood spot assay through the mail or a minimal contact …	Patterns and persistence of SARS-CoV-2 IgG antibodies in Chicago to monitor COVID-19 exposure	-1	unanswerable	unanswerable	2021-05-10 10:00:00
sowqbvtd	sowqbvtd	BackgroundWe recently showed that seasonal patterns of COVID-19 incidence and Influenza-Like Illnesses incidence are highly similar, in a country in the temperate climate zone, such as the Netherlands (latitude: 52{degrees}N). We hypothesize that in The Netherlands the same environmental factors and mobility trends that are associated with the seasonality of flu-like illnesses are predictors of C…	Environmental factors and mobility predict COVID-19 seasonality	-1	unanswerable	unanswerable	2021		154
u6gr7n8w	u6gr7n8w	In the shadow of the coronavirus (Covid-19) pandemic, the sterilization has become a major necessity for humans to avoid exponential Infection. In order to avoid touching contaminated surfaces, we develop an embedded system prototype, which allows the bottle or any other medium to pour the sterilization product without touching it. The human hands are detected using two sensors HC-SR04 and LM35. …	Embedded System Prototype to Fight Covid-19 Pandemic Contamination with Less Cost	-1	unanswerable	unanswerable	2021
85a57ux0	85a57ux0	SIMPLE SUMMARY: This retrospective study reports on 10 patients with radiation-associated angiosarcoma of the breast and chest wall treated during the past decade. In this rare disease local control is highly dependent on the extent of surgery. Further treatment options are urgently needed. Re-iradiation in combination with localized hyperthermia should be considered for adjuvant and definitive t…	Radiation-Associated Angiosarcoma of the Breast and Chest Wall Treated with Thermography-Controlled, Contactless wIRA-Hyperthermia and Hypofractionated Re-Irradiation	-1	unanswerable	unanswerable	2021-08-03 10:00:00
x14iywtr	x14iywtr	We propose an additional intervention that would contribute to the control of the COVID-19 pandemic, offer more protection for people working in essential jobs, and help guide an eventual reopening of society. The intervention is based on: (1) testing every individual (2) repeatedly, and (3) self-quarantine of infected individuals. Using a standard epidemiological model (SIR), we show here that b…	Population-scale testing can suppress the spread of COVID-19	-1	unanswerable	unanswerable	2020-05-01 10:00:00
3vntjg8d	3vntjg8d	COVID-19 data from India is compared against several countries as well as key states in the US with a major outbreak, and it is found that the basic reproduction number R_0 for India is in the expected range of 1.4-3.9. Further, the rate of growth of infections in India is very close to that in Washington and California. Exponential and classic susceptible-infected-recovered (SIR) models based on…	Predictions for COVID-19 outbreak in India using Epidemiological models	1	disease name: COVID-19 location: India date: by the end of May 2020 R0 value: 1.4-3.9 %CI values: - method: Exponential and classic susceptible-infected-recovered (SIR) models	[{"contribution":{"disease name": "COVID-19", "location": "India", "date": "by the end of May 2020", "R0 value": "1.4-3.9", "%CI values": "-", "method": "Exponential and classic susceptible-infected-recovered (SIR) models"}}]	2020-04-06
jxyz8d9w	jxyz8d9w	In this article, we model and study the spread of COVID-19 in Germany, Japan, India and highly impacted states in India, i.e., in Delhi, Maharashtra, West Bengal, Kerala and Karnataka. We consider recorded data published in Worldometers and COVID-19 India websites from April 2020 to July 2021, including periods of interest where these countries and states were hit severely by the pandemic. Our me…	Dynamical analysis of the infection status in diverse communities due to COVID-19 using a modified SIR model	-1	unanswerable	unanswerable	2022-03-11 05:00:00
36j3x8hv	36j3x8hv	The Philippines confirmed local transmission of COVID-19 on 7 March 2020. We described the characteristics and epidemiological time-to-event distributions for laboratory-confirmed cases in the Philippines recorded up to 29 April 2020 and followed until 22 May 2020. The median age of 8212 cases was 46 years (IQR 32-61), with 46.2% being female and 68.8% living in the National Capital Region. Healt…	Epidemiological profile and transmission dynamics of COVID-19 in the Philippines	1	disease name: COVID-19 location: Philippines date: prior to the enhanced community quarantine (ECQ; 11 February and 19 March) R0 value: 2.41 %CI values: (95% CI 2.33-2.48) method: - | disease name: COVID-19 location: Philippines date: During the ECQ (20 March to 9 April) R0 value: 0.89 %CI values: (95% CI 0.78-1.02) method: -	[{"contribution":{"disease name": "COVID-19", "location": "Philippines", "date": "prior to the enhanced community quarantine (ECQ; 11 February and 19 March)", "R0 value": "2.41", "%CI values": "(95% CI 2.33-2.48)", "method": "-"}},{"contribution":{"disease name": "COVID-19", "location": "Philippines", "date": "During the ECQ (20 March to 9 April)", "R0 value": "0.89", "%CI values": "(95% CI 0.78-…	2020		279
ctixnkkb	ctixnkkb	State government-mandated social distancing measures have helped to slow the growth of the COVID-19 pandemic in the United States. Many of the current predictive models of the development of COVID-19, especially after mitigation efforts, partially rely on extrapolations from data collected in other countries. Since most states enacted stay-at-home orders towards the end of March, the resulting ef…	Effect of mitigation measures on the spreading of COVID-19 in hard-hit states in the U.S	-1	unanswerable	unanswerable	2020
lwdf5i0x	lwdf5i0x	Middle East respiratory syndrome coronavirus has been persistent in the Middle East region since 2012. In this paper, we propose a deterministic mathematical model to investigate the effect of media coverage on the transmission and control of Middle Eastern respiratory syndrome coronavirus disease. In order to do this we develop model formulation. Basic reproduction number R 0 will be calculated …	Modeling the Transmission Dynamics of Middle Eastern Respiratory Syndrome Coronavirus with the Impact of Media Coverage	0	disease name: Middle Eastern Respiratory Syndrome Coronavirus (MERS-CoV) location: - date: - R0 value: - %CI values: - method: deterministic mathematical model	[{"contribution":{"disease name": "Middle Eastern Respiratory Syndrome Coronavirus (MERS-CoV)", "location": "-", "date": "-", "R0 value": "-", "%CI values": "-", "method": "deterministic mathematical model"}}]	2021
l8bv5t3o	l8bv5t3o	Background: In December 2019, an outbreak of respiratory illness caused by a novel coronavirus (2019-nCoV) emerged in Wuhan, China and has swiftly spread to other parts of China and a number of foreign countries. The 2019-nCoV cases might have been under-reported roughly from 1 to 15 January 2020, and thus we estimated the number of unreported cases and the basic reproduction number, R(0), of 201…	Estimating the Unreported Number of Novel Coronavirus (2019-nCoV) Cases in China in the First Half of January 2020: A Data-Driven Modelling Analysis of the Early Outbreak	1	disease name: 2019-nCoV location: China date: 1 December 2019 - 24 January 2020 R0 value: 2.56 %CI values: (95% CI: 2.49-2.63). method: maximum likelihood estimation, serial intervals (SI) of SARS and MERS	[{"contribution":{"disease name": "2019-nCoV", "location": "China", "date": "1 December 2019 - 24 January 2020", "R0 value": "2.56", "%CI values": "(95% CI: 2.49-2.63).", "method": "maximum likelihood estimation, serial intervals (SI) of SARS and MERS"}}]	2020-02-01 05:00:00
lggsbtal	lggsbtal	This paper deals with a general SEIR model for the coronavirus disease 2019 (COVID-19) with the effect of time delay proposed. We get the stability theorems for the disease-free equilibrium and provide adequate situations of the COVID-19 transmission dynamics equilibrium of present and absent cases. A Hopf bifurcation parameter Ãâ€ž concerns the effects of time delay and we demonstrate that the …	A study on COVID-19 transmission dynamics: stability analysis of SEIR model with Hopf bifurcation for effect of time delay	-1	unanswerable	unanswerable	2020
pr7wbh5a	pr7wbh5a	INTRODUCTION: The SARS-COVID-19 pandemic restricted in-lab research activities especially in older individuals who are considered at-risk for severe disease. To continue longitudinal sleep research in this population we sought to test the feasibility of remotely conducting at-home sleep and memory research and to compare two ambulatory polysomnography (PSG) devices for ongoing home sleep testing.…	703 From in-lab to at-home: Measuring sleep and memory in the time of SARS-COVID-19	-1	unanswerable	unanswerable	2021-05-03 10:00:00
kidzfxzg	kidzfxzg	Building an effective and highly usable epidemiology model presents two main challenges: finding the appropriate, realistic enough model that takes into account complex biological, social and environmental parameters and efficiently estimating the parameter values with which the model can accurately match the available outbreak data, provide useful projections. The reproduction number of the nove…	Estimation of parameters for a humidity-dependent compartmental model of the COVID-19 outbreak	-1	unanswerable	unanswerable	2021-02-18 05:00:00
cq6mivr9	cq6mivr9	Background: Estimating key infectious disease parameters from the COVID-19 outbreak is quintessential for modelling studies and guiding intervention strategies. Whereas different estimates for the incubation period distribution and the serial interval distribution have been reported, estimates of the generation interval for COVID-19 have not been provided. Methods: We used outbreak data from clus…	Estimating the generation interval for COVID-19 based on symptom onset data	0	disease name: COVID-19 location: Singapore and Tianjin, China date: - R0 value: - %CI values: - method: -	[{"contribution":{"disease name": "COVID-19", "location": "Singapore and Tianjin, China", "date": "-", "R0 value": "-", "%CI values": "-", "method": "-"}}]	2020-03-08 05:00:00
ao75xgxr	ao75xgxr	INTRODUCTION: The COVID-19 pandemic is an enormous stressor that can impact various dimensions of health, including sleep health. Older adults may be particularly vulnerable. Coping strategies to manage stress can also impact health outcomes by modifying the relationships between perceived stress and health outcomes. This study examined concurrent and longitudinal associations between perceived s…	649 Coping strategies moderate the effect of perceived stress on sleep and health in older adults during the COVID-19 pandemic	-1	unanswerable	unanswerable	2021-05-03 10:00:00
u7tqolyi	u7tqolyi	Background England has experienced one of the highest rates of confirmed COVID-19 mortality in the world. SARS-CoV-2 virus has circulated in hospitals, care homes and the community since January 2020. Our current epidemiological knowledge is largely informed by clinical cases with far less understanding of community transmission. Methods The REal-time Assessment of Community Transmission (REACT) …	Community prevalence of SARS-CoV-2 virus in England during May 2020: REACT study	1	disease name: COVID-19 location: England date: May 2020 R0 value: 0.57 %CI values: 0.45, 0.72 method: REal-time Assessment of Community Transmission (REACT) study	[{"contribution":{"disease name": "COVID-19", "location": "England", "date": "May 2020", "R0 value": "0.57", "%CI values": "0.45, 0.72", "method": "REal-time Assessment of Community Transmission (REACT) study"}}]	2020-07-11
hp6ovupr	hp6ovupr	Determinants of COVID-19 clinical severity are commonly assessed by transverse or longitudinal studies of the fatality counts. However, the fatality counts depend both on disease clinical severity and transmissibility, as more infected also lead to more deaths. Moreover, fatality counts (and related measures such as Case Fatality Rate) are dynamic quantities, as they appear with a delay to infect…	COVID-19 severity determinants inferred through ecological and epidemiological modeling	-1	unanswerable	unanswerable	2021
ej2u795y	ej2u795y	This paper studies a new extended SEIR (susceptible-exposed-infectious recovered) epidemic model which incorporates the contribution of infective contagions to the resident population from infective exposed (E-o) and infectious (I-o) outsiders as well as eventual delayed re-susceptibility by partial loss of immunity. It is referred to as a SEIRDEoIo since the dead individuals caused by the diseas…	On a new SEIRDEoIo epidemic model eventually initiated from outside with delayed re-susceptibility and vaccination and treatment feedback controls	-1	unanswerable	unanswerable	2021
2srcjvkb	2srcjvkb	In this study, we have presented a data-driven SEIR compartmental model for the 2019 coronavirus infections in Ghana. Using the fminsearch optimization routine in Matlab, and the reported cumulative infected cases of COVID-19 in Ghana from 13th March 2020 to 6th October 2020, we have estimated the basic reproduction number, R-0 approximate to 1.0413. We have further developed a controlled SEIR dy…	Nonlinear Dynamics of Covid-19 Seir Infection Model with Optimal Control Analysis	1	disease name: COVID-19 location: Ghana date: 13th March 2020 to 6th October 2020 R0 value: 1.0413 %CI values: - method: a data-driven SEIR compartmental model	[{"contribution":{"disease name": "COVID-19", "location": "Ghana", "date": "13th March 2020 to 6th October 2020", "R0 value": "1.0413", "%CI values": "-", "method": "a data-driven SEIR compartmental model"}}]	2021
o4h9ufl7	o4h9ufl7	Background: Since the outbreak of novel coronavirus disease (COVID-19) in Wuhan, China at the beginning of December 2019, there have been over 11,200,000 confirmed cases in the world as of the 3rd July 2020, affecting over 213 countries and regions with nearly 530,000 deaths. The pandemic has been sweeping all continents, North America, Latin America, Europe, Middle East and South Asia among othe…	The global COVID-19 pandemic at a crossroads: relevant countermeasures and ways ahead	-1	unanswerable	unanswerable	2020
4svw6b35	4svw6b35	INTRODUCTION: Research on the benefits of Ã¢â‚¬ËœartsÃ¢â‚¬â„¢ interventions to improve individualsÃ¢â‚¬â„¢ physical, social and psychological well-being is growing, but evidence on implementation and scale-up into health and social care systems is lacking. This protocol reports the SHAPER-Implement programme (Scale-up of Health-Arts Programmes Effectiveness-Implementation Research), aimed at stud…	Study protocol: randomised controlled hybrid type 2 trial evaluating the scale-up of two arts interventions for postnatal depression and ParkinsonÃ¢â‚¬â„¢s disease	-1	unanswerable	unanswerable	2022-02-01 05:00:00
wa5il5go	wa5il5go	Novel infectious diseases continue to emerge within human populations. Predictive studies have begun to identify pathogen traits associated with emergence. However, emerging pathogens vary widely in virulence, a key determinant of their ultimate risk to public health. Here, we use structured literature searches to review the virulence of each of the 214 known human-infective RNA virus species. We…	Tissue tropism and transmission ecology predict virulence of human RNA viruses	-1	unanswerable	unanswerable	2019-11-26 05:00:00
8mvz3425	8mvz3425	OBJECTIVES: To investigate the heterogeneous transmission patterns of Middle East respiratory syndrome (MERS) in the Republic of Korea, with a particular focus on epidemiological characteristics of superspreaders. DESIGN: Retrospective epidemiological analysis. SETTING: Multiple healthcare facilities of secondary and tertiary care centres in an urban setting. PARTICIPANTS: A total of 185 laborato…	Identifying determinants of heterogeneous transmission dynamics of the Middle East respiratory syndrome (MERS) outbreak in the Republic of Korea, 2015: a retrospective epidemiological analysis	1	disease name: Middle East respiratory syndrome (MERS) location: Republic of Korea date: - R0 value: 1.0 %CI values: - method: a function of time and according to different types of hosts	[{"contribution":{"disease name": "Middle East respiratory syndrome (MERS)", "location": "Republic of Korea", "date": "-", "R0 value": "1.0", "%CI values": "-", "method": "a function of time and according to different types of hosts"}}]	2016-02-22 05:00:00
t7bq4yqw	t7bq4yqw	Background The first COVID-19 case in Kenya was confirmed on March 13th, 2020. Here, we provide forecasts for the potential incidence rate, and magnitude, of a COVID-19 epidemic in Kenya based on the observed growth rate and age distribution of confirmed COVID-19 cases observed in China, whilst accounting for the demographic and geographic dissimilarities between China and Kenya. Methods We devel…	Forecasting the scale of the COVID-19 epidemic in Kenya	1	disease name: COVID-19 location: Kenya date: March 13th, 2020 R0 value: 1.78 to 3.46 %CI values: (95% CI 1.44 - 2.14) to (95% CI 2.81-4.17) method: a modelling framework to simulate SARS-CoV-2 transmission in Kenya, KenyaCoV	[{"contribution":{"disease name": "COVID-19", "location": "Kenya", "date": "March 13th, 2020", "R0 value": "1.78 to 3.46", "%CI values": "(95% CI 1.44 - 2.14) to (95% CI 2.81-4.17)", "method": "a modelling framework to simulate SARS-CoV-2 transmission in Kenya, KenyaCoV"}}]	2020-04-14
keoham3m	keoham3m	ABSTRACT Objective: to produce a predictive model for the incidence of COVID-19 cases, severity and deaths in Ponta Grossa, state of ParanÃƒÂ¡. Methods: this is an ecological study with data from confirmed cases of COVID-19 reported between March 21, 2020 and May 3, 2020 in Ponta Grossa and proportion of severity, hospitalization and lethality in the literature. A susceptible-infected-recovered (…	Predictive model for Covid-19 incidence in a medium-sized municipality in Brazil (Ponta Grossa, ParanÃƒÂ¡)/ Modelo predictivo de la ocurrencia de Covid-19 en un municipio de tamaÃƒÂ±o medio en Brasil (Ponta Grossa-ParanÃƒÂ¡)/ Modelo preditivo da ocorrÃƒÂªncia de Covid-19 em municÃƒÂ­pio de mÃƒÂ©dio porte no Brasil (Ponta Grossa-ParanÃƒÂ¡)	1	disease name: COVID-19 location: Ponta Grossa date: March 21, 2020 and May 3, 2020 R0 value: 1.07 %CI values: - method: susceptible-infected-recovered (SIR) epidemic model	[{"contribution":{"disease name": "COVID-19", "location": "Ponta Grossa", "date": "March 21, 2020 and May 3, 2020", "R0 value": "1.07", "%CI values": "-", "method": "susceptible-infected-recovered (SIR) epidemic model"}}]	2020
l0t0bnwh	l0t0bnwh	Objectives: Compartmental models are helpful tools to simulate and predict the spread of infectious diseases. In this work we use the SEIR model to discuss the spreading of COVID-19 pandemic for countries with the most confirmed cases up to the end of 2020, i.e. the United States, Russia, the United Kingdom, France, Brazil, and India. The simulation considers the susceptible, exposed, infective, …	Applying SEIR model without vaccination for COVID-19 in case of the United States, Russia, the United Kingdom, Brazil, France, and India	1	disease name: COVID-19 location: United States, Russia, the United Kingdom, France, Brazil, and India date: up to December 29, 2020 R0 value: 2.146 (average value), [1.0158-3.6642 ] (range without vaccination) %CI values: - method: SEIR model	[{"contribution":{"disease name": "COVID-19", "location": "United States, Russia, the United Kingdom, France, Brazil, and India", "date": "up to December 29, 2020", "R0 value": "2.146 (average value), [1.0158-3.6642 ] (range without vaccination)", "%CI values": "-", "method": "SEIR model"}}]	2021
ce8rg7qh	ce8rg7qh	It is unclear when, where and how novel pathogens such as human immunodeficiency virus (HIV), monkeypox and severe acute respiratory syndrome (SARS) will cross the barriers that separate their natural reservoirs from human populations and ignite the epidemic spread of novel infectious diseases. New pathogens are believed to emerge from animal reservoirs when ecological changes increase the pathog…	The role of evolution in the emergence of infectious diseases	-1	unanswerable	unanswerable	2003
1qfsf1i2	1qfsf1i2	The SARS-CoV-2 virus from Europe has reached Peru on March 5 and since March 16 a state of national emergency has been declared, leading to the confinement of the entire population. The objective of this study is to characterize the epidemic evolution of coronavirus disease (COVID-19) applying the SIR model (Susceptible-Infectious-recovered or deceased) during a period of 200 days. The time serie…	Modelo SIR de la tendencia pandÃƒÂ©mica de COVID-19 en PerÃƒÂº	1	disease name: COVID-19 location: Peru date: March 06 to May 14, 2020 R0 value: 1.5 %CI values: - method: SIR model (Susceptible-Infectious-recovered or deceased)	[{"contribution":{"disease name": "COVID-19", "location": "Peru", "date": "March 06 to May 14, 2020", "R0 value": "1.5", "%CI values": "-", "method": "SIR model (Susceptible-Infectious-recovered or deceased)"}}]	2021-08-23
feen4e8w	feen4e8w	In this paper, we propose a dynamical model to describe the transmission of COVID-19, which is spreading in China and many other countries. To avoid a larger outbreak in the worldwide, Chinese government carried out a series of strong strategies to prevent the situation from deteriorating. Home quarantine is the most important one to prevent the spread of COVID-19. In order to estimate the effect…	Modeling the Control of COVID-19: Impact of Policy Interventions and Meteorological Factors	-1	unanswerable	unanswerable	2020-03-06 05:00:00
jpo2qfhm	jpo2qfhm	BACKGROUND: At present, India is in the decreasing phase of the second wave of severe acute respiratory syndrome coronavirus 2 (SARS-CoV-2). But India as a country is in the second position in a high number of confirmed cases (33,678,786) in the world (after the United States of America) and third position in the number of COVID-19 deaths (after the United States and Brazil) at 465,082 deaths. Al…	COVID-19 disease spread modeling by QSIR method: The parameter optimal control approach	1	disease name: COVID-19 location: India date: May 25, 2020 R0 value: 1.1475 %CI values: - method: conventional SIR model was modified so that a new compartment Q(quarantine) is added to the conventional SIR model to analyze the COVID-19 impact	[{"contribution":{"disease name": "COVID-19", "location": "India", "date": "May 25, 2020", "R0 value": "1.1475", "%CI values": "-", "method": "conventional SIR model was modified so that a new compartment Q(quarantine) is added to the conventional SIR model to analyze the COVID-19 impact"}}]	2021-12-14
qd3alhhq	qd3alhhq	OBJECTIVE: To understand the epidemiology and burden of severe coronavirus disease 2019 (covid-19) during the first epidemic wave on the west coast of the United States. DESIGN: Prospective cohort study. SETTING: Kaiser Permanente integrated healthcare delivery systems serving populations in northern California, southern California, and Washington state. PARTICIPANTS: 1840 people with a first acu…	Incidence, clinical outcomes, and transmission dynamics of severe coronavirus disease 2019 in California and Washington: prospective cohort study	-1	unanswerable	unanswerable	2020-05-22
b4vqz5cz	b4vqz5cz	Background: Coronavirus Disease 2019 (COVID-19) is currently a global public health threat. Outside of China, Italy is one of the countries suffering the most with the COVID-19 epidemic. It is important to predict the epidemic trend of the COVID-19 epidemic in Italy to help develop public health strategies. Methods: We used time-series data of COVID-19 from Jan 22 2020 to Apr 02 2020. An infectio…	Extended SIR Prediction of the Epidemics Trend of COVID-19 in Italy and Compared With Hunan, China	1	disease name: COVID-19 location: Italy date: Jan 22 2020 to Apr 02 2020 R0 value: 4.34 %CI values: (95% CI, 3.04-6.00) method: Markov Chain Monte Carlo | disease name: COVID-19 location: Hunan, China date: Jan 22 2020 to Apr 02 2020 R0 value: 3.16 %CI values: (95% CI, 1.73-5.25) method: Markov Chain Monte Carlo	[{"contribution":{"disease name": "COVID-19", "location": "Italy", "date": "Jan 22 2020 to Apr 02 2020", "R0 value": "4.34", "%CI values": "(95% CI, 3.04-6.00)", "method": "Markov Chain Monte Carlo"}},{"contribution":{"disease name": "COVID-19", "location": "Hunan, China", "date": "Jan 22 2020 to Apr 02 2020", "R0 value": "3.16", "%CI values": "(95% CI, 1.73-5.25)", "method": "Markov Chain Monte …	2020		377
wubaahn2	wubaahn2	A key priority in infectious disease research is to understand the ecological and evolutionary drivers of viral diseases from data on disease incidence as well as viral genetic and antigenic variation. We propose using a simulation-based, Bayesian method known as Approximate Bayesian Computation (ABC) to fit and assess phylodynamic models that simulate pathogen evolution and ecology against summa…	Phylodynamic Inference and Model Assessment with Approximate Bayesian Computation: Influenza as a Case Study	-1	unanswerable	unanswerable	2012-12-27
0q8fedqf	0q8fedqf	Limited information is available on the transmission and spread of influenza virus in pig populations with differing immune statuses. In this study we assessed differences in transmission patterns and quantified the spread of a triple reassortant H1N1 influenza virus in naÃƒÂ¯ve and vaccinated pig populations by estimating the reproduction ratio (R) of infection (i.e. the number of secondary infe…	Vaccination of influenza a virus decreases transmission rates in pigs	1	disease name: H1N1 influenza location: - date: - R0 value: 10.66 non-vaccinated (NV) %CI values: (6.57-16.46) in non-vaccinated (NV) method: deterministic Susceptible-Infectious-Recovered (SIR) model, fitted on experimental data | disease name: H1N1 influenza location: - date: - R0 value: 1 vaccinated with a heterologous vaccine (HE) %CI values: (0.39-2.09) vaccinated with a heterologous vaccine …	[{"contribution":{"disease name": "H1N1 influenza", "location": "-", "date": "-", "R0 value": "10.66 non-vaccinated (NV)", "%CI values": "(6.57-16.46) in non-vaccinated (NV)", "method": "deterministic Susceptible-Infectious-Recovered (SIR) model, fitted on experimental data"}},{"contribution":{"disease name": "H1N1 influenza", "location": "-", "date": "-", "R0 value": "1 vaccinated with a heterol…	2011-12-20 05:00:00		1219
v346cpkl	v346cpkl	Background: The SARS-CoV-2 disease 2019 (COVID-19) pandemic has spread across the world with varying impact on health systems and outcomes. We assessed how the type and timing of public- health interventions impacted the course of the outbreak in Alberta and other Canadian provinces. Methods: We used publicly-available data to summarize rates of laboratory data and mortality in relation to measur…	The Coronavirus 2019 pandemic in Canada: the impact of public health interventions on the course of the outbreak in Alberta and other provinces	1	disease name: SARS-CoV-2 disease 2019 (COVID-19) location: Canada date: before the state of emergency declaration R0 value: varied widely from 2.6 to 6.4 %CI values: varied widely from (95% confidence intervals 1.9-3.4) (4.3-8.5) method: -	[{"contribution":{"disease name": "SARS-CoV-2 disease 2019 (COVID-19)", "location": "Canada", "date": "before the state of emergency declaration", "R0 value": "varied widely from 2.6 to 6.4", "%CI values": "varied widely from (95% confidence intervals 1.9-3.4) (4.3-8.5)", "method": "-"}}]	43964.4
viy8flxm	viy8flxm	BACKGROUND: Rapid spread of severe acute respiratory syndrome coronavirus 2 (SARS-CoV-2) in Wuhan, China, prompted heightened surveillance in Shenzhen, China. The resulting data provide a rare opportunity to measure key metrics of disease course, transmission, and the impact of control measures. METHODS: From Jan 14 to Feb 12, 2020, the Shenzhen Center for Disease Control and Prevention identifie…	Epidemiology and transmission of COVID-19 in 391 cases and 1286 of their close contacts in Shenzhen, China: a retrospective cohort study	1	disease name: SARS-CoV-2 location: Shenzhen, China date: Jan 14 to Feb 12, 2020 R0 value: 0.4 %CI values: 95% CI 0.3-0.5 method: -	[{"contribution":{"disease name": "SARS-CoV-2", "location": "Shenzhen, China", "date": "Jan 14 to Feb 12, 2020", "R0 value": "0.4", "%CI values": "95% CI 0.3-0.5", "method": "-"}}]	2020
8cb0d5rd	8cb0d5rd	Vaccination is an effective measure to control the diffusion of infectious disease such as COVID-19. This paper analyzes the basic reproduction number in South Korea which enables us to identify a necessary level of vaccine stockpile to achieve herd immunity. An susceptible-infected-susceptible model is adopted that allows a stochastic diffusion. The result shows that the basic reproduction numbe…	A Study on Herd Immunity of COVID-19 in South Korea: Using a Stochastic Economic-Epidemiological Model	1	disease name: COVID-19 location: South Korea date: - R0 value: approximately 2 %CI values: - method: susceptible-infected-susceptible model	[{"contribution":{"disease name": "COVID-19", "location": "South Korea", "date": "-", "R0 value": "approximately 2", "%CI values": "-", "method": "susceptible-infected-susceptible model"}}]	2020
i77kln5g	i77kln5g	As the world experiences yet another surge in cases of COVID-19, many organizations and jurisdictions have reinstated or expanded mandates to protect workers, children, older people, and the public at large. Mandates to wear face masks in indoor public areas are often met with confusion, fear, anger, disagreement, and lack of knowledge about risks and benefits of action and inaction. To move towa…	Index-Based Policy to Guide Mask-Wearing for SARS-CoV-2 and Other Pandemics (preprint)	-1	unanswerable	unanswerable	2022
1dcaz8v2	1dcaz8v2	BACKGROUND: To put COVID-19 patients into hospital timely, the clinical diagnosis had been implemented in Wuhan in the early epidemic. Here we compared the epidemiological characteristics of laboratory-confirmed and clinically diagnosed cases with COVID-19 in Wuhan. METHODS: Demographics, case severity and outcomes of 29,886 confirmed cases and 21,960 clinically diagnosed cases reported between D…	The comparison of epidemiological characteristics between confirmed and clinically diagnosed cases with COVID-19 during the early epidemic in Wuhan, China	-1	unanswerable	unanswerable	2021
hkodduzn	hkodduzn	In this work, the SIR epidemiological model is reformulated so to highlight the important {\em effective reproduction number}, as well as to account for the {\em generation time}, inverse of the {\em incidence rate}, and the {\em infectious period} (or {\em removal period}), inverse of the {\em removal rate}. The aim is to check whether the relationships the model poses among the various observab…	The SIR model towards he data. One year of Covid-19 pandemic in Italy case study and plausible"real"numbers	-1	unanswerable	unanswerable	2021-06-03 10:00:00
jplg9qjm	jplg9qjm	The objective of this Personal View is to compare transmissibility, hospitalisation, and mortality rates for severe acute respiratory syndrome coronavirus 2 (SARS-CoV-2) with those of other epidemic coronaviruses, such as severe acute respiratory syndrome coronavirus (SARS-CoV) and Middle East respiratory syndrome coronavirus (MERS-CoV), and pandemic influenza viruses. The basic reproductive rate…	Comparing SARS-CoV-2 with SARS-CoV and influenza pandemics	-1	unanswerable	unanswerable	2020
mw2x69wb	mw2x69wb	The most important question and concern in these circumstances of COVID-19 epidemic outspread is when will the pandemic end? Vaccination is the only solution to restore life to normalcy in the fastest and safest possible manner. Therefore, we have carried out a predictive analysis for realistic timescale estimates for overcoming the epidemic considering vaccination rate effect on the dynamics of …	Predictive analysis of COVID-19 eradication with vaccination in India, Brazil, and U.S.A	-1	unanswerable	unanswerable	2021
4ngvwm6j	4ngvwm6j	The global pandemic of coronavirus disease 2019 (COVID-19) has killed almost two million people worldwide and over 400 thousand in the United States (US). As the pandemic evolves, informed policy-making and strategic resource allocation relies on accurate forecasts. To predict the spread of the virus within US counties, we curated an array of county-level demographic and COVID-19-relevant health …	A seq2seq model to forecast the COVID-19 cases, deaths and reproductive R numbers in US counties	0	disease name: COVID-19 location: US counties date: - R0 value: - %CI values: - method: a forecasting model using deep learning (DL), an autoencoder-based Seq2Seq model with gated recurrent units (GRUs) in the deep recurrent layers	[{"contribution":{"disease name": "COVID-19", "location": "US counties", "date": "-", "R0 value": "-", "%CI values": "-", "method": "a forecasting model using deep learning (DL), an autoencoder-based Seq2Seq model with gated recurrent units (GRUs) in the deep recurrent layers"}}]	2021-04-20 10:00:00
uoo72jrd	uoo72jrd	As of October 2021, neither established agents (e.g., hydroxychloroquine) nor experimental drugs have lived up to their initial promise as antiviral treatment against SARS-CoV-2 infection. While vaccines are being globally deployed, variants of concern (VOCs) are emerging with the potential for vaccine escape. VOCs are characterized by a higher within-host transmissibility, and this may alter the…	Effectiveness of Antiviral Therapy in Highly-Transmissible Variants of SARS-CoV-2: A Modeling and Simulation Study	-1	unanswerable	unanswerable	2022-02-09 05:00:00
sahy3tu4	sahy3tu4	In this paper, a generalized fractional-order SEIR model is proposed, denoted by SEIQRP model, which has a basic guiding significance for the prediction of the possible outbreak of infectious diseases like COVID-19 and other insect diseases in the future. Firstly, some qualitative properties of the model are analyzed. The basic reproduction number $R_{0}$ is derived. When $R_{0}<1$, the disease-f…	Forecast analysis of the epidemics trend of COVID-19 in the United States by a generalized fractional-order SEIR model	-1	unanswerable	unanswerable	2020-04-27 10:00:00
f4il3snf	f4il3snf	The goal of this work is to analyse the effects of control policies for the coronavirus (COVID-19) epidemic in Brazil. This is done by considering an age-structured SEIR model with a quarantine class and two types of controls. The first one studies the sensitivity with regard to the parameters of the basic reproductive number R0 which is calculated by the next generation method. The second one ev…	Assessing the Efficiency of Different Control Strategies for the Coronavirus (COVID-19) Epidemic	0	disease name: Coronavirus (COVID-19) location: Brazil date: - R0 value: - %CI values: - method: next generation method	[{"contribution":{"disease name": "Coronavirus (COVID-19)", "location": "Brazil", "date": "-", "R0 value": "-", "%CI values": "-", "method": "next generation method"}}]	2020
lht9jsel	lht9jsel	In an effort to provide regional decision support for the public healthcare, we design a data-driven compartment-based model of COVID-19 in Sweden. From national hospital statistics we deduce parameter priors, and we develop linear filtering techniques to drive the simulations given data in the form of daily healthcare demands. We additionally put forward an optimization scheme which enables a re…	Bayesian Monitoring of COVID-19 in Sweden	-1	unanswerable	unanswerable	2022-05-02 10:00:00
lpnxwxql	lpnxwxql	We propose an epidemiological model using an adaptive dynamic three compartment (with four states) SIR(D) model. Our approach is similar to non-parametric curve fitting in spirit and automatically adapts to key external factors, such as interventions, while retaining the parsimonious nature of the standard SIR(D) model. Initial dynamic temporal estimates of the model parameters are obtained by mi…	Modelling COVID-19 -- I A dynamic SIR(D) with application to Indian data	1	disease name: COVID-19 location: India, three regions (Andhra Pradesh, Maharashtra and Uttar Pradesh) date: March 14 - August 31, 2020 R0 value: More than 2 %CI values: - method: epidemiological model using an adaptive dynamic three compartment (with four states) SIR(D) model | disease name: COVID-19 location: India, in 13 regions date: March 14 - August 31, 2020 R0 value: between 1.5 and 2 %CI v…	[{"contribution":{"disease name": "COVID-19", "location": "India, three regions (Andhra Pradesh, Maharashtra and Uttar Pradesh)", "date": "March 14 - August 31, 2020", "R0 value": "More than 2", "%CI values": "-", "method": "epidemiological model using an adaptive dynamic three compartment (with four states) SIR(D) model"}},{"contribution":{"disease name": "COVID-19", "location": "India, in 13 re…	2020		945
y2bshgjf	y2bshgjf	When the entire world is eagerly waiting for a safe, effective and widely available COVID-19 vaccine, unprecedented spikes of new cases are evident in numerous countries. To gain a deeper understanding about the future dynamics of COVID-19, a compartmental mathematical model has been proposed in this paper incorporating all possible non-pharmaceutical intervention policies. Model parameters have …	Projections and fractional dynamics of COVID-19 with optimal control analysis	-1	unanswerable	unanswerable	2020-11-18 05:00:00
u170bj15	loh2ch0q	Following the rapid dissemination of COVID-19 cases in Switzerland, large-scale non-pharmaceutical interventions (NPIs) were implemented by the cantons and the federal government between 28 February and 20 March 2020. Estimates of the impact of these interventions on SARS-CoV-2 transmission are critical for decision making in this and future outbreaks. We here aim to assess the impact of these NP…	Assessing the impact of non-pharmaceutical interventions on SARS-CoV-2 transmission in Switzerland.	1	disease name: COVID-19 location: Switzerland date: at the beginning of the epidemic R0 value: 2.8 %CI values: 95% confidence interval 2.1-3.8 method: fitting a stochastic transmission model explicitly simulating within-hospital dynamics | disease name: COVID-19 location: Switzerland date: in the period of 29 March to 5 April R0 value: 0.4 %CI values: (95% QR 0.3-0.58) method: fitting a stochastic…	[{"contribution":{"disease name": "COVID-19", "location": "Switzerland", "date": "at the beginning of the epidemic", "R0 value": "2.8", "%CI values": "95% confidence interval 2.1-3.8", "method": "fitting a stochastic transmission model explicitly simulating within-hospital dynamics"}},{"contribution":{"disease name": "COVID-19", "location": "Switzerland", "date": "in the period of 29 March to 5 A…	2020-05-18	change_main_cord_id	1265
fbbs7ful	fbbs7ful	The SARS-CoV-2 epidemic in France has had a large death toll. It has not affected all regions similarly, since the death rate can vary several folds between regions where the epidemic has remained at a low level and regions where it got an early burst. The epidemic has been slowed down by a lockdown that lasted for almost eight weeks, and individuals can now move between metropolitan French regio…	Predicted effects of summer holidays and seasonality on the SARS-Cov-2 epidemic in France	-1	unanswerable	unanswerable	2020-07-07 10:00:00
7vovcrj5	7vovcrj5	Timely prediction of the COVID-19 progression is not possible without a comprehensive understanding of environmental factors that may affect the infection transmissibility. Studies addressing parameters that may influence COVID-19 progression relied on either the total numbers of detected cases and similar proxies and/or a small number of analyzed factors, including analysis of regions that displ…	Effects of demographic and weather parameters on COVID-19 basic reproduction number	0	disease name: COVID-19 location: 118 different countries date: - R0 value: - %CI values: - method: nonlinear dynamics methods to the exponential regime	[{"contribution":{"disease name": "COVID-19", "location": "118 different countries", "date": "-", "R0 value": "-", "%CI values": "-", "method": "nonlinear dynamics methods to the exponential regime"}}]	2020-10-19 10:00:00
y23uvvut	y23uvvut	BACKGROUND: To date, there is a lack of sufficient evidence on the type of clusters in which severe acute respiratory syndrome coronavirus 2 (SARS-CoV-2) is most likely to spread. Notably, the differences between cluster-level and population-level outbreaks in epidemiological characteristics and transmissibility remain unclear. Identifying the characteristics of these two levels, including epidem…	Epidemiological Characteristics and Transmissibility for SARS-CoV-2 of Population Level and Cluster Level in a Chinese City	1	disease name: severe acute respiratory syndrome coronavirus 2 (SARS-CoV-2) location: Chaoyang District, Beijing City, China date: 1 Jan 2020 to 2 March 2020 R0 value: factory-level clusters: 16 %CI values: - method: susceptible-exposed-infected-asymptomatic-recovered (SEIAR) model | disease name: severe acute respiratory syndrome coronavirus 2 (SARS-CoV-2) location: Chaoyang District, Beijing Cit…	[{"contribution":{"disease name": "severe acute respiratory syndrome coronavirus 2 (SARS-CoV-2)", "location": "Chaoyang District, Beijing City, China", "date": "1 Jan 2020 to 2 March 2020", "R0 value": "factory-level clusters: 16", "%CI values": "-", "method": "susceptible-exposed-infected-asymptomatic-recovered (SEIAR) model"}},{"contribution":{"disease name": "severe acute respiratory syndrome …	44579		1292
mtcdkiq0	mtcdkiq0	We analyzed the social isolation relaxation strategies adopted by the twelve biggest Brazilian cities in 2020, in relation to the number of cases, number of deaths and the effective reproduction number (Rt), which are internationally considered the fundamental epidemiological criteria for allowing wider population mobility in public spaces. The Brazilian central government has not set unique guid…	Social isolation relaxation and the effective reproduction number (Rt) of COVID-19 in twelve Brazilian cities	-1	unanswerable	unanswerable	2021
2jobhrry	2jobhrry	In late 2019, a novel coronavirus, the SARS-CoV-2 outbreak was identified in Wuhan, China and later spread to every corner of the globe. Whilst the number of infection-induced deaths in Ghana, West Africa are minimal when compared with the rest of the world, the impact on the local health service is still significant. Compartmental models are a useful framework for investigating transmission of d…	Modelling COVID-19 Transmission Dynamics in Ghana	1	disease name: COVID-19 location: Ghana date: March 13 to August 10, 2020 R0 value: 3.11 %CI values: 2.042 - 3.240 method: modified SEIR compartmental model with nine compartments (CoVCom9) | disease name: COVID-19 location: Ghana date: March 13 to August 10, 2020 R0 value: 2.623 (mean value) %CI values: - method: modified SEIR compartmental model with nine compartments (CoVCom9)	[{"contribution":{"disease name": "COVID-19", "location": "Ghana", "date": "March 13 to August 10, 2020", "R0 value": "3.11", "%CI values": "2.042 - 3.240", "method": "modified SEIR compartmental model with nine compartments (CoVCom9)"}},{"contribution":{"disease name": "COVID-19", "location": "Ghana", "date": "March 13 to August 10, 2020", "R0 value": "2.623 (mean value)", "%CI values": "-", "me…	2021		285
8b337dze	8b337dze	Colombia is the worldÃ¢â‚¬â„¢s largest producer of fique fibers (Furcraea bedinghausii), with a net production of 30,000 tons per year. This work proposes to revalue waste from the Colombian fique agroindustry. For this purpose, cellulose nanofibers were obtained from fique and used as reinforcement material to create acrylic superabsorbent hydrogels. Unreinforced acrylic hydrogels (AHR0) and acr…	Hydrogels Are Reinforced with Colombian Fique Nanofibers to Improve Techno-Functional Properties for Agricultural Purposes	-1	unanswerable	unanswerable	2022
cmavwmbp	cmavwmbp	We propose a mathematical model with five compartments for the SARS-CoV-2 transmission: susceptible $S$, undetected infected asymptomatic $A$, undetected infected symptomatic $I$, confirmed positive and isolated $L$, and recovered $ R$, for which we have a twofold objective. First, we formulate and solve an inverse problem focusing mainly on the identification of the values $A_{0}$ and $ I_{0}$ o…	Identification and control of SARS-CoV-2 epidemic model parameters	-1	unanswerable	unanswerable	2020
hc151hwg	hc151hwg	Aims To generate a predictive model for the SARS-COV-2 viral reproductive rate, based on government policy and weather parameters. Methods A multivariate model for the log10 of viral reproductive rate was constructed for each country using lockdown stringency (Oxford University tracker), temperature and humidity, for the 1st 110 days of 2020. This was validated by extrapolating to the following 5…	Predicting the future SARS-COV-2 reproductive rate	0	disease name: SARS-COV-2 location: 40 countries date: - R0 value: - %CI values: - method: -	[{"contribution":{"disease name": "SARS-COV-2", "location": "40 countries", "date": "-", "R0 value": "-", "%CI values": "-", "method": "-"}}]	2020-08-13 10:00:00
lsl0j6cp	lsl0j6cp	The infection caused by COVID-19 (i.e. corona virus disease 2019) has caused more than 5.2 million cases and more than 337,000 deaths worldwide. Italy was the European epicenter for virus spread and one with most cases and deaths. The first Italian patient was diagnosed on February 18th, a young man hospitalized in Lombardy (Northern Italy). The Italian government not only isolated the village wh…	COVID-19 Infection Pandemic: From the Frontline in Italy.	1	disease name: COVID-19 (i.e. corona virus disease 2019) location: Italy date: during the first three months after the outbreak R0 value: between 2.1 and 3.3 %CI values: - method: Analysis of COVID-19 Italian data during the first three months after the outbreak and the effect of lockdown.	[{"contribution":{"disease name": "COVID-19 (i.e. corona virus disease 2019)", "location": "Italy", "date": "during the first three months after the outbreak", "R0 value": "between 2.1 and 3.3", "%CI values": "-", "method": "Analysis of COVID-19 Italian data during the first three months after the outbreak and the effect of lockdown."}}]	2020-10-16
wh4ald1r	wh4ald1r	An epidemic disease caused by a new coronavirus has spread in Northern Italy with a strong contagion rate. We implement an SEIR model to compute the infected population and number of casualties of this epidemic. The example may ideally regard the situation in the Italian Region of Lombardy, where the epidemic started on February 25, but by no means attempts to perform a rigorous case study in vie…	A simulation of a COVID-19 epidemic based on a deterministic SEIR model	1	disease name: COVID-19 location: Northern Italy date: initially R0 value: 3 %CI values: - method: deterministic SEIR model | disease name: COVID-19 location: Northern Italy date: at day 22 R0 value: 1.38 %CI values: - method: deterministic SEIR model | disease name: COVID-19 location: Northern Italy date: after day 35 R0 value: 0.64 %CI values: - method: deterministic SEIR model	[{"contribution":{"disease name": "COVID-19", "location": "Northern Italy", "date": "initially", "R0 value": "3", "%CI values": "-", "method": "deterministic SEIR model"}},{"contribution":{"disease name": "COVID-19", "location": "Northern Italy", "date": "at day 22", "R0 value": "1.38", "%CI values": "-", "method": "deterministic SEIR model"}},{"contribution":{"disease name": "COVID-19", "locatio…	43945		134
19h9l5fh	19h9l5fh	BACKGROUND: Mathematical modelling may aid in understanding the complex interactions between injury and immune response in critical illness. METHODS: We utilize a system biology model of COVID-19 to analyze the effect of altering baseline patient characteristics on the outcome of immunomodulatory therapies. We create example parameter sets meant to mimic diverse patient types. For each patient ty…	Strategies to minimize heterogeneity and optimize clinical trials in Acute Respiratory Distress Syndrome (ARDS): Insights from mathematical modelling	-1	unanswerable	unanswerable	2022-01-13 05:00:00
rmtyrbg0	rmtyrbg0	We developed and studied a mathematical model of HIV+. Two equilibriums points were found, disease free and endemic equilibrium, and basic reproduction ratio [Formula: see text] was also calculated by the use of next generation matrix. Global stability analysis of the equilibria was carried out by the use of Lyapunov function, and it was shown that the stability of the equilibria depends on the m…	Global Stability Analysis of HIV+ Model	1	disease name: HIV+ location: Turkey date: - R0 value: 1.98998 %CI values: - method: Global stability analysis of the equilibria was carried out by the use of Lyapunov function	[{"contribution":{"disease name": "HIV+", "location": "Turkey", "date": "-", "R0 value": "1.98998", "%CI values": "-", "method": "Global stability analysis of the equilibria was carried out by the use of Lyapunov function"}}]	2018-12-29
6rvgnalf	6rvgnalf	Background: Treatment options for outpatients with COVID-19 could reduce morbidity and prevent SARS-CoV-2 transmission. Methods: In this randomized, double-blind, three-arm (1:1:1) placebo-equivalent controlled trial conducted remotely throughout the United States, adult outpatients with laboratory-confirmed SARS-CoV-2 infection were recruited. Participants were randomly assigned to receive hydro…	Hydroxychloroquine with or without azithromycin for treatment of early SARS-CoV-2 infection among high-risk outpatient adults: A randomized clinical trial	-1	unanswerable	unanswerable	2021
2233iv8q	2233iv8q	The state of an infectious disease can represent the degree of infectivity of infected individuals, or susceptibility of susceptible individuals, or immunity of recovered individuals, or a combination of these measures. When the disease progression is long such as for HIV, individuals often experience switches among different states. We derive an epidemic model in which infected individuals have …	Epidemic models with discrete state structures	-1	unanswerable	unanswerable	2021
sbam78qr	sbam78qr	The conventional susceptible-infectious-recovered (SIR) model tends to magnify the transmission dynamics of infectious diseases, and thus the estimated total infections and immunized population may be higher than the threshold required for infection control and eradication. The study developed a new SIR framework that allows the transmission rate of infectious diseases to decline along with the r…	Modelling infectious diseases with herd immunity in a randomly mixed population	-1	unanswerable	unanswerable	2021-10-18 10:00:00
9axupkbr	9axupkbr	This work explores Routhâ€“Hurwitz stability and complex dynamics in models for awareness programs to mitigate the spread of epidemics. Here, the investigated models are the integer-order model for awareness programs and their corresponding fractional form. A non-negative solution is shown to exist inside the globally attracting set (GAS) of the fractional model. It is also shown that the disease…	Routhâ€“Hurwitz Stability and Quasiperiodic Attractors in a Fractional-Order Model for Awareness Programs: Applications to COVID-19 Pandemic	1	disease name: COVID-19 location: KSA date: - R0 value: 1.977828168 %CI values: - method: extended fractional Routhâ€“Hurwitz scheme	[{"contribution":{"disease name": "COVID-19", "location": "KSA", "date": "-", "R0 value": "1.977828168", "%CI values": "-", "method": "extended fractional Routhâ€“Hurwitz scheme"}}]	2022
l049jxw8	l049jxw8	We propose a general Bayesian approach to modeling epidemics such as COVID-19. The approach grew out of specific analyses conducted during the pandemic, in particular an analysis concerning the effects of non-pharmaceutical interventions (NPIs) in reducing COVID-19 transmission in 11 European countries. The model parameterizes the time varying reproduction number $R_t$ through a regression framew…	Semi-Mechanistic Bayesian Modeling of COVID-19 with Renewal Processes	-1	unanswerable	unanswerable	2020
xykdxq26	xykdxq26	In December 2019, a novel coronavirus (SARS-CoV-2) has been identified to cause acute respiratory disease in humans. An outbreak of this disease has been reported in mainland China with the city of Wuhan as the recognized epicenter. The disease has also been exported to other countries, including the Philippines, but the level of spread is still under control (as of 08 February 2020). To describe…	Insights from early mathematical models of 2019-nCoV acute respiratory disease (COVID-19) dynamics	-1	unanswerable	unanswerable	2020
ruwt7sj6	ruwt7sj6	Background: Symptoms associated with SARS-CoV-2 infection remain incompletely understood, especially among ambulatory, non-hospitalized individuals. Objective: Identify symptom and patient factors associated with detection of SARS-CoV-2 in outpatients. Design: Retrospective cohort analysis. Setting: An outpatient testing program in North Carolina. Patients: 20,177 individuals presenting between M…	COVID-19 Symptoms at Presentation and Association with Positivity Among Outpatients Tested for SARS-CoV-2	-1	unanswerable	unanswerable	2021
vfeu3zli	vfeu3zli	The rapid expansion of coronavirus disease 2019 (COVID-19) has been observed in many parts of the world. Many newly reported cases of COVID-19 during early outbreak phases have been associated with travel history from an epidemic region (identified as imported cases). For those cases without travel history, the risk of wider spreads through community contact is even higher. However, most populati…	The effects of border control and quarantine measures on the spread of COVID-19	1	disease name: coronavirus disease 2019 (COVID-19) location: top 10 visiting cities from Wuhan in China date: - R0 value: 2.92 %CI values: - method: mathematical framework extending from a meta-population model embedding city-to-city connections to stratify the dynamics of transmission waves caused by imported, secondary, and others from an outbreak source region when control measures are consider…	[{"contribution":{"disease name": "coronavirus disease 2019 (COVID-19)", "location": "top 10 visiting cities from Wuhan in China", "date": "-", "R0 value": "2.92", "%CI values": "-", "method": "mathematical framework extending from a meta-population model embedding city-to-city connections to stratify the dynamics of transmission waves caused by imported, secondary, and others from an outbreak so…	2020
cssi466a	cssi466a	DPCAR's short- and long-term outcomes are highly diverse, while the causes and prevention of ischemic complications are unclear. To assess oncological, surgical, and hemodynamic outcomes of 40 consecutive DPCARs for pancreatic (n37) and gastric tumors (n3) (2009-2021), retrospective analyses of mortality, morbidity, survival, and hemodynamic consequences after DPCAR were undertaken using case his…	Hemodynamic, Surgical and Oncological Outcomes of 40 Distal Pancreatectomies with Celiac and Left Gastric Arteries Resection (DP CAR) without Arterial Reconstructions and Preoperative Embolization	-1	unanswerable	unanswerable	2022
we2co7wh	we2co7wh	BackgroundThe third wave of COVID-19 in England peaked in January 2022 resulting from the rapid transmission of the Omicron variant. However, rates of hospitalisations and deaths were substantially lower than in the first and second waves MethodsIn the REal-time Assessment of Community Transmission-1 (REACT-1) study we obtained data from a random sample of 94,950 participants with valid throat an…	The Omicron SARS-CoV-2 epidemic in England during February 2022	-1	unanswerable	unanswerable	2022
wj97hgf0	wj97hgf0	As the COVID-19 pandemic has strongly disrupted people's daily work and life, a great amount of scientific research has been conducted to understand the key characteristics of this new epidemic. In this manuscript, we focus on four crucial epidemic metrics with regard to the COVID-19, namely the basic reproduction number, the incubation period, the serial interval and the epidemic doubling time. …	Meta-analysis of several epidemic characteristics of COVID-19.	-1	unanswerable	unanswerable	2020-07-01 10:00:00
fgwoijut	fgwoijut	Brazil holds approximately 1/3 of population living infected with AIDS (acquired immunodeficiency syndrome) in Central and South Americas, and it was also the first developing country to implement a large-scale control and intervention program against AIDS epidemic. In this scenario, we investigate the temporal evolution and current status of the AIDS epidemic in Brazil. Specifically, we analyze …	Growth Patterns and Scaling Laws Governing AIDS Epidemic in Brazilian Cities	-1	unanswerable	unanswerable	2014-10-23
q0kzgcsi	q0kzgcsi	INTRODUCTION: Early in the COVID-19 pandemic, Brazil adopted measures to minimize the spread of the virus, including quarantine orders where people only left home for essential business. This practice could negatively impact sleep by reducing exposure to daylight and physical activity. We examined subjective sleep quality in Baependi, a small rural town in Brazil during the COVID-19 quarantine or…	234 Sleep quality during the coronavirus pandemic in a Brazilian family-based cohort	-1	unanswerable	unanswerable	2021-05-03 10:00:00
osg76shb	osg76shb	BACKGROUND: While most children who contract COVID-19 experience mild disease, high-risk children with underlying conditions may develop severe disease, requiring interventions. Kinetics of antibodies transferred via COVID-19 convalescent plasma early in disease have not been characterized. METHODS: In this study, high-risk children were prospectively enrolled to receive high-titer COVID-19 conva…	Pharmacokinetics of high-titer antiÃ¢â‚¬â€œSARS-CoV-2 human convalescent plasma in high-risk children	-1	unanswerable	unanswerable	2022-01-25
ljfnqqwr	ljfnqqwr	Aiming to achieve the highest combustion efficiency and less pollutant emission, a catalytic coating for cylinder walls in internal combustion engines was developed and tested under several conditions. The coating consists of a La0.8Sr0.2CoO3 (LSCO) catalyst on an aluminum-based ceramic support. Atomic force microscopy was applied to investigate the surface roughness of the LSCO coating, while in…	Perovskite Catalyst for In-Cylinder Coating to Reduce Raw Pollutant Emissions of Internal Combustion Engines	-1	unanswerable	unanswerable	2022
x40l8ljx	x40l8ljx	Background: Physical distancing measures that reduce social contacts have formed a key part of national COVID-19 containment and mitigation strategies. Many Sub-Saharan African nations are now facing increasing numbers of cases of COVID-19 and there is a need to understand what levels of measures may be required to successfully reduce transmission. Methods: We collated epidemiological data along …	The projected impact of mitigation and suppression strategies on the COVID-19 epidemic in Senegal: A modelling study	1	disease name: COVID-19 location: Senegal date: - R0 value: 1.9 to 1.3 %CI values: (95% CI 1.7-2.2) to (95% CI 1.2-1.5) method: age-structured SEIR model	[{"contribution":{"disease name": "COVID-19", "location": "Senegal", "date": "-", "R0 value": "1.9 to 1.3", "%CI values": "(95% CI 1.7-2.2) to (95% CI 1.2-1.5)", "method": "age-structured SEIR model"}}]	44016.4
spwnhin2	spwnhin2	Viral diseases are very hazardous for humanity because in the case of most viral diseases, drugs are not effective. At present, the whole world is living with the fear of COVID-19. From time to time, several viral diseases have been troubling human life. In this article, we have tried to capture the progression dynamics of Zika Virus (ZIKV) infection in the Indian scenario. A constructed model is…	SIR-SI mathematical model for Zika virus progression dynamics in India: a case study	1	disease name: Zika Virus (ZIKV) location: India date: - R0 value: 0.36 %CI values: - method: Susceptible-Infected-Recovered (SIR) structure	[{"contribution":{"disease name": "Zika Virus (ZIKV)", "location": "India", "date": "-", "R0 value": "0.36", "%CI values": "-", "method": "Susceptible-Infected-Recovered (SIR) structure"}}]	2021
fp6fhijm	fp6fhijm	Objectives.--To estimate the basic reproduction number of the Wuhan novel coronavirus (2019-nCoV). Methods.--Based on the susceptible-exposed-infected-removed (SEIR) compartment model and the assumption that the infectious cases with symptoms occurred before January 25, 2020 are resulted from free propagation without intervention, we estimate the basic reproduction number of 2019-nCoV according t…	Preliminary prediction of the basic reproduction number of the Wuhan novel coronavirus 2019-nCoV	1	disease name: 2019-nCoV location: Wuhan date: - R0 value: 2.8 to 3.3 %CI values: - method: (SEIR) compartment model, using the real-time reports on the number of 2019-nCoV infected cases from People's Daily in China | disease name: 2019-nCoV location: Wuhan date: - R0 value: 3.2 and 3.9 %CI values: - method: (SEIR) compartment model, on the basis of the predicted number of infected cases from col…	[{"contribution":{"disease name": "2019-nCoV", "location": "Wuhan", "date": "-", "R0 value": "2.8 to 3.3", "%CI values": "-", "method": "(SEIR) compartment model, using the real-time reports on the number of 2019-nCoV infected cases from People's Daily in China"}},{"contribution":{"disease name": "2019-nCoV", "location": "Wuhan", "date": "-", "R0 value": "3.2 and 3.9", "%CI values": "-", "method"…	2020		269
l82zj4ne	l82zj4ne	We review and assess the classic SIR and SEIR epidemiological models regarding possible applications to the COVID-19 pandemic. In spite of numerous more complicated models, we show how the qualitative features of the solution to the SIR and SEIR models continue to provide valuable public health insights in some scenarios. Using estimated COVID-19 data as of this date, the SEIR model shows that if…	The SIR and SEIR Epidemiological Models Revisited	1	disease name: COVID-19 location: - date: - R0 value: reduce R0 from 2.5 to 1.25 %CI values: - method: classic SIR and SEIR epidemiological models	[{"contribution":{"disease name": "COVID-19", "location": "-", "date": "-", "R0 value": "reduce R0 from 2.5 to 1.25", "%CI values": "-", "method": "classic SIR and SEIR epidemiological models"}}]	2020
oyrj0uvz	oyrj0uvz	Severe acute respiratory syndrome coronavirus 2 (SARS-CoV-2)--the virus that causes coronavirus disease (COVID-19)--has been detected in domestic dogs and cats, raising concerns of transmission from, to, or between these animals. There is currently no indication that feline- or canine-to-human transmission can occur, though there is rising evidence of the reverse. To explore the extent of animal-…	Rising evidence of COVID-19 transmission potential to and between animals: do we need to be concerned?	1	disease name: coronavirus disease (COVID-19) location: Wuhan, China date: as of 15 May 2020 R0 value: 1.09 %CI values: 95% confidence interval: 1.05, 1.13 method: -	[{"contribution":{"disease name": "coronavirus disease (COVID-19)", "location": "Wuhan, China", "date": "as of 15 May 2020", "R0 value": "1.09", "%CI values": "95% confidence interval: 1.05, 1.13", "method": "-"}}]	2020-05-25
q3r327z7	q3r327z7	BACKGROUND: Standard epidemiological theory claims that in structured populations competition between multiple pathogen strains is a deterministic process which is mediated by the basic reproduction number ([Image: see text]) of the individual strains. A new theory based on analysis, simulation and empirical study challenges this predictor of success. PRINCIPAL FINDINGS: We show that the quantity…	Evolutionary Entropy Determines Invasion Success in Emergent Epidemics	-1	unanswerable	unanswerable	2010-09-23
hpm3nm0n	hpm3nm0n	The second wave of COVID-19, which began in India around 11 February 2021, has hit the country hard with daily cases reaching nearly triple the first peak value as on 19 April 2021. The epidemic evolution in India is complex due to regional inhomogeneities and the spread of several coronavirus mutants. In this study, we characterize the virus spread in the ongoing second wave in India and its sta…	Characterization of the second wave of COVID-19 in India	-1	unanswerable	unanswerable	2021
aynb6d9b	aynb6d9b	Aim: The outbreak of the new coronavirus pandemic (SARS-CoV-2) was initiated in December 2019, and within a couple of months it became a global health emergency. Given the importance to assess the evolution and transmissibility of SARS-CoV-2 and to forecast the next scenario of the pandemic, mainly in countries with limited healthcare systems, we estimated the reproductive number (R0) of SARS-CoV…	Predicted impacts of government policies and actions on the SARS-CoV-2 disease in the northwestern Himalayan region, India	1	disease name: SARS-CoV-2 location: Jammu and Kashmir (J&K), India date: - R0 value: 1.041 %CI values: - method: -	[{"contribution":{"disease name": "SARS-CoV-2", "location": "Jammu and Kashmir (J&K), India", "date": "-", "R0 value": "1.041", "%CI values": "-", "method": "-"}}]	2021
9jhwjmya	9jhwjmya	Most U.S. colleges have reopened campuses for in-person teaching this Fall, following rapid closures at the onset of the COVID-19 pandemic this Spring. Despite administrative efforts at mitigation and preventive measures, the large congregation of students within close quarters has caused public health concerns. In this paper, we examine college reopenings' association with changes in human mobil…	College Openings, Mobility, and the Incidence of COVID-19 Cases	-1	unanswerable	unanswerable	2020-09-23 10:00:00
5h65alv0	5h65alv0	Background: The basic reproduction number values give an initial prediction of the disease because the values predict of end of the disease if the values are less than one or the disease converts to epidemic if the values are more than one. We apply the SIRD epidemiology model for estimating the basic reproduction number of the new coronavirus disease for multiple different countries. Methods: Fo…	The basic reproduction number of the new coronavirus pandemic with mortality for India, the Syrian Arab Republic, the United States, Yemen, China, France, Nigeria and Russia with different rate of cases	1	disease name: new coronavirus disease location: India, the Syrian Arab Republic, the United States, Yemen, China, France, Nigeria and Russia date: reported up to date July 30, 2020 R0 value: 1.0011 for the smallest value and 2.7936 for the greatest value %CI values: - method: SIRD model using the Runge-Kutta simulation method	[{"contribution":{"disease name": "new coronavirus disease", "location": "India, the Syrian Arab Republic, the United States, Yemen, China, France, Nigeria and Russia", "date": "reported up to date July 30, 2020", "R0 value": "1.0011 for the smallest value and 2.7936 for the greatest value", "%CI values": "-", "method": "SIRD model using the Runge-Kutta simulation method"}}]	2020
0p3jnxx2	0p3jnxx2	There are five different forms of intervention presently realised by the Indonesian government in an effort to end the COVID-19 pandemic: vaccinations, social restrictions, tracings, testings, and treatments. In this paper, we construct an SVEIQHR-type mathematical model for the disease's spread in the country, which incorporates as parameters the rates of the above interventions, as well as the …	From Pandemic to a New Normal: Strategies to Optimise Governmental Interventions in Indonesia Based on an SVEIQHR-Type Mathematical Model	-1	unanswerable	unanswerable	2022-03-30
0rutgr1j	0rutgr1j	In this work, we develop and analyze a nonautonomous mathematical model for the spread of the new corona-virus disease (COVID-19) in Saudi Arabia. The model includes eight time-dependent compartments: the dynamics of low-risk [Formula: see text] and high-risk [Formula: see text] susceptible individuals; the compartment of exposed individuals E; the compartment of infected individuals (divided int…	A mathematical model for the spread of COVID-19 and control mechanisms in Saudi Arabia	-1	unanswerable	unanswerable	2021-05-14 10:00:00
ow88ttby	ow88ttby	In this study, we develop and analyze a nested multi-scale model for COVID -19 disease that integrates within-host scale and between-host scale sub-models. First, the well-posedness of the multi-scale model is discussed, followed by the stability analysis of the equilibrium points. The disease-free equilibrium point is shown to be globally asymptotically stable for $R_0<1$. When $R_0$ exceeds uni…	A Nested Multi-Scale Model for COVID-19 Viral Infection	-1	unanswerable	unanswerable	2021-08-27 10:00:00
hgjmdajl	hgjmdajl	The outbreak of COVID-19 on the Diamond Princess Cruise Ship provides an unprecedented opportunity to estimate its original transmissibility with basic reproductive number (R0) and the effectiveness of containment measures. We developed an ordinary differential equation-based Susceptible-Exposed-Infected-Recovery (SEIR) model with Bayesian underpinning to estimate the main parameter of R0 determi…	The Bayesian Susceptible-Exposed-Infected-Recovered model for the outbreak of COVID-19 on the Diamond Princess Cruise Ship	1	disease name: COVID-19 location: Diamond Princess Cruise Ship date: 2020 R0 value: 5.70 %CI values: 95% credible interval: 4.23-7.79 method: ordinary differential equation-based Susceptible-Exposed-Infected-Recovery (SEIR) model with Bayesian underpinning	[{"contribution":{"disease name": "COVID-19", "location": "Diamond Princess Cruise Ship", "date": "2020", "R0 value": "5.70", "%CI values": "95% credible interval: 4.23-7.79", "method": "ordinary differential equation-based Susceptible-Exposed-Infected-Recovery (SEIR) model with Bayesian underpinning"}}]	2021
ow86uvwi	ow86uvwi	In this work, we use a within-host viral dynamic model to describe the SARS-CoV-2 kinetics in the host. Chest radiograph score data are used to estimate the parameters of that model. Our result shows that the basic reproductive number of SARS-CoV-2 in host growth is around 3.79. Using the same method we also estimate the basic reproductive number of MERS virus is 8.16 which is higher than SARS-Co…	The within-host viral kinetics of SARS-CoV-2.	1	disease name: SARS-CoV-2 location: - date: - R0 value: 3.79 %CI values: - method: PRCC method	[{"contribution":{"disease name": "SARS-CoV-2", "location": "-", "date": "-", "R0 value": "3.79", "%CI values": "-", "method": "PRCC method"}}]	2020-03-26
7q2hbawl	7q2hbawl	BACKGROUND: Communicable disease outbreaks of novel or existing pathogens threaten human health around the globe. It would be desirable to rapidly characterize such outbreaks and develop accurate projections of their duration and cumulative size even when limited preliminary data are available. Here we develop a mathematical model to aid public health authorities in tracking the expansion and con…	An IDEA for Short Term Outbreak Projection: Nearcasting Using the Basic Reproduction Number	-1	unanswerable	unanswerable	2013-12-31 05:00:00
tjuiwbru	tjuiwbru	Estimates of the basic reproduction number (R(0)) for COVID-19 are particularly variable in the context of transmission within locations such as long-term healthcare (LTHC) facilities. We sought to characterize the heterogeneity of R(0) across known outbreaks within these facilities. We used a unique comprehensive dataset of all outbreaks that occurred within LTHC facilities in British Columbia, …	Quantifying transmissibility of SARS-CoV-2 and impact of intervention within long-term healthcare facilities	1	disease name: COVID-19 location: British Columbia, Canada date: as of 21 September 2020 R0 value: 2.51 %CI values: (90% credible interval 0.47-9.0) method: novel Bayesian hierarchical dynamic model	[{"contribution":{"disease name": "COVID-19", "location": "British Columbia, Canada", "date": "as of 21 September 2020", "R0 value": "2.51", "%CI values": "(90% credible interval 0.47-9.0)", "method": "novel Bayesian hierarchical dynamic model"}}]	2022-01-12 05:00:00
919uu0yq	919uu0yq	Novel variants continue to emerge in the SARS-CoV-2 pandemic. University testing programs may provide timely epidemiologic and genomic surveillance data to inform public health responses. We conducted testing from September 2021 to February 2022 in a university population under vaccination and indoor mask mandates. A total of 3,048 of 24,393 individuals tested positive for SARS-CoV-2 by RT-PCR; w…	Mapping the emergence of SARS-CoV-2 Omicron variants on a university campus	1	disease name: SARS-CoV-2 (Omicron) location: university campus date: September 2021 to February 2022 R0 value: 2.4 %CI values: - method: - | disease name: SARS-CoV-2(Delta) location: university campus date: September 2021 to February 2022 R0 value: 1.8 %CI values: - method: -	[{"contribution":{"disease name": "SARS-CoV-2 (Omicron)", "location": "university campus", "date": "September 2021 to February 2022", "R0 value": "2.4", "%CI values": "-", "method": "-"}},{"contribution":{"disease name": "SARS-CoV-2(Delta)", "location": "university campus", "date": "September 2021 to February 2022", "R0 value": "1.8", "%CI values": "-", "method": "-"}}]	2022		222
32v44sw9	32v44sw9	Summary Background Since Dec 31, 2019, the Chinese city of Wuhan has reported an outbreak of atypical pneumonia caused by the 2019 novel coronavirus (2019-nCoV). Cases have been exported to other Chinese cities, as well as internationally, threatening to trigger a global outbreak. Here, we provide an estimate of the size of the epidemic in Wuhan on the basis of the number of cases exported from W…	Nowcasting and forecasting the potential domestic and international spread of the 2019-nCoV outbreak originating in Wuhan, China: a modelling study	1	disease name: 2019 novel coronavirus (2019-nCoV) location: Wuhan, China date: Dec 31, 2019, to Jan 28, 2020 R0 value: 2.68 %CI values: 95% CrI 2·47-2·86 method: Markov Chain Monte Carlo methods	[{"contribution":{"disease name": "2019 novel coronavirus (2019-nCoV)", "location": "Wuhan, China", "date": "Dec 31, 2019, to Jan 28, 2020", "R0 value": "2.68", "%CI values": "95% CrI 2·47-2·86", "method": "Markov Chain Monte Carlo methods"}}]	2020-03-06
songybub	songybub	The COVID-19 epidemic had spread rapidly through China and subsequently proliferated globally leading to a pandemic situation around the globe. Human-to-human transmissions, as well as asymptomatic transmissions of the infection, have been confirmed. As of April 03, 2020, public health crisis in China due to COVID-19 is potentially under control. We compiled a daily dataset of case counts, mortal…	COVID-19 in China: Risk Factors and R(0) Revisited	0	disease name: COVID-19 location: China date: January 11 to April 07, 2020 R0 value: - %CI values: - method: computational analysis utilizing the reported cases in China	[{"contribution":{"disease name": "COVID-19", "location": "China", "date": "January 11 to April 07, 2020", "R0 value": "-", "%CI values": "-", "method": "computational analysis utilizing the reported cases in China"}}]	2020-10-22 10:00:00		853
l5o5ck0w	l5o5ck0w	Background: The emergence of Coronavirus disease 2019 (COVID-19) as a global pandemic presents a serious health threat to African countries and the livelihoods of its people. To mitigate the impact of this disease, these countries implemented intervention measures including self-isolation, the closure of schools, banning of public gatherings, social distancing and border closures. Several epidemi…	Using outbreak data to estimate the dynamic COVID-19 landscape in Eastern Africa	1	disease name: Coronavirus Disease 2019 (COVID-19) location: Rwanda date: since March 02 2020 R0 value: 1.32 %CI values: 95% CI, 1.17 - 1.49 method: Extended Susceptible-Infected-Removed (eSIR) Compartmental Model | disease name: Coronavirus Disease 2019 (COVID-19) location: Kenya date: since March 02 2020 R0 value: 8.52 %CI values: 95% CI: 3.73 - 14.10 method: Extended Susceptible-Infected-Remove…	[{"contribution":{"disease name": "Coronavirus Disease 2019 (COVID-19)", "location": "Rwanda", "date": "since March 02 2020", "R0 value": "1.32", "%CI values": "95% CI, 1.17 - 1.49", "method": "Extended Susceptible-Infected-Removed (eSIR) Compartmental Model"}},{"contribution":{"disease name": "Coronavirus Disease 2019 (COVID-19)", "location": "Kenya", "date": "since March 02 2020", "R0 value": "…	2021		1320
0yalk7qe	0yalk7qe	BACKGROUND: Without any pharmaceutical intervention and vaccination, the only way to combat Coronavirus Disease 2019 (COVID-19) is to slow down the spread of the disease by adopting non-pharmaceutical public health interventions (PHIs). Patient isolation, lockdown, quarantine, social distancing, changes in health care provision, and mass screening are the most common non-pharmaceutical PHIs to co…	Effectiveness of the non-pharmaceutical public health interventions against COVID-19; a protocol of a systematic review and realist review	-1	unanswerable	unanswerable	2020
0vha3dkc	0vha3dkc	We fitted a model of SARS-CoV-2 transmission in care homes and the community to regional surveillance data for England. Among control measures implemented, only national lockdown brought the reproduction number below 1 consistently; introduced one week earlier it could have reduced first wave deaths from 36,700 to 15,700 (95%CrI: 8,900-26,800). Improved clinical care reduced the infection fatalit…	The 2020 SARS-CoV-2 epidemic in England: key epidemiological drivers and impact of interventions	-1	unanswerable	unanswerable	2021-01-13 05:00:00
cj43pn0f	cj43pn0f	Italy was the first European country affected by the Sars-Cov-2 pandemic, with the first autochthonous case identified on Feb 21st. Specific control measures restricting social contacts were introduced by the Italian government starting from the beginning of March. In the current study we analyzed public data from the four most affected Italian regions. We (i) estimated the time-varying reproduct…	Approaches to Daily Monitoring of the SARS-CoV-2 Outbreak in Northern Italy	-1	unanswerable	unanswerable	2020-05-22 10:00:00
hi3z5093	hi3z5093	Background: Prediction of the dynamics of new SARS-CoV-2 infections during the current COVID-19 pandemic is critical for public health planning of efficient health care allocation and monitoring the effects of policy interventions. We describe a new approach that forecasts the number of incident cases in the near future given past occurrences using only a small number of assumptions. Methods: Our…	COVID-19: Short term prediction model using daily incidence data	-1	unanswerable	unanswerable	2020-11-24 05:00:00
r9itwxcp	r9itwxcp	Understanding the transmission dynamics of COVID-19 is crucial for evaluating its spread pattern, especially in metropolitan areas of China, as its spread can lead to secondary outbreaks outside Wuhan, the center of the new coronavirus disease outbreak. In addition, the experiences gained and lessons learned from China have the potential to provide evidence to support other metropolitan areas and…	Evaluating the secondary transmission pattern and epidemic prediction of the COVID-19 in metropolitan areas of China	1	disease name: COVID-19 location: Beijing date: January 24, 2020, to February 23, 2020 R0 value: 2.91 %CI values: - method: group of SEIR model statistical parameters were estimated using Markov chain Monte Carlo (MCMC) methods | disease name: COVID-19 location: Shanghai date: January 24, 2020, to February 23, 2020 R0 value: 2.78 %CI values: - method: group of SEIR model statistical parameters wer…	[{"contribution":{"disease name": "COVID-19", "location": "Beijing", "date": "January 24, 2020, to February 23, 2020", "R0 value": "2.91", "%CI values": "-", "method": "group of SEIR model statistical parameters were estimated using Markov chain Monte Carlo (MCMC) methods"}},{"contribution":{"disease name": "COVID-19", "location": "Shanghai", "date": "January 24, 2020, to February 23, 2020", "R0 …	2020-03-08		1463
imwtbtgy	imwtbtgy	The COVID-19 pandemic has had unprecedented social and economic consequences in the United States. Therefore, accurately predicting the dynamics of the pandemic can be very beneficial. Two main elements required for developing reliable predictions include: (1) a predictive model and (2) an indicator of the current condition and status of the pandemic. As a pandemic indicator, we used the effectiv…	Predicting the Dynamics of the COVID-19 Pandemic in the United States Using Graph Theory-Based Neural Networks	-1	unanswerable	unanswerable	2021
gg9i3hnr	gg9i3hnr	The effective reproductive number Re is a key indicator of the growth of an epidemic. Since the SARS-CoV-2 pandemic started, many methods and online dashboards have sprung up to monitor this number. However, these methods are not always thoroughly tested or are applied only to a limited geographic range. Here, we present a method for near real time monitoring of Re, applied to epidemic data from …	Estimation and worldwide monitoring of the effective reproductive number of SARS-CoV-2	-1	unanswerable	unanswerable	2020-11-30
1mc6ebzj	1mc6ebzj	We analyse the economics and epidemiology of different scenarios for a phased restart of the UK economy. Our economic model is designed to address the unique features of the COVID-19 pandemic. Social distancing measures affect both supply and demand, and input-output constraints play a key role in restricting economic output. Standard models for production functions are not adequate to model the …	Production networks and epidemic spreading: How to restart the UK economy?	-1	unanswerable	unanswerable	2020
7ivhai9s	7ivhai9s	OBJECTIVES: A hospital-related cluster of 22 cases of coronavirus disease 2019 (COVID-19) occurred in Taiwan in January-February 2021. Rigorous control measures were introduced and could only be relaxed once the outbreak was declared over. Each day after the apparent outbreak end, we estimated the risk of future cases occurring in order to inform decision-making. METHODS: Probabilistic transmissi…	A hospital-related outbreak of SARS-CoV-2 associated with variant Epsilon (B.1.429) in Taiwan: transmission potential and outbreak containment under intensified contact tracing, January-February 2021	1	disease name: coronavirus disease 2019 (COVID-19) location: Taiwan date: January-February 2021 R0 value: 1.30 %CI values: 95% credible interval (CI) 0.57-3.80 method: Probabilistic transmission networks were reconstructed, and transmission parameters (the reproduction number R and overdispersion parameter k) were estimated	[{"contribution":{"disease name": "coronavirus disease 2019 (COVID-19)", "location": "Taiwan", "date": "January-February 2021", "R0 value": "1.30", "%CI values": "95% credible interval (CI) 0.57-3.80", "method": "Probabilistic transmission networks were reconstructed, and transmission parameters (the reproduction number R and overdispersion parameter k) were estimated"}}]	2021		1284
6xz6jnht	6xz6jnht	In this research, COVID-19 model is formulated by incorporating harmonic mean type incidence rate which is more realistic in average speed. Basic reproduction number, equilibrium points, and stability of the proposed model is established under certain conditions. Runge-Kutta fourth order approximation is used to solve the deterministic model. The model is then fractionalized by using Caputo-Fabri…	Fractional dynamics and stability analysis of COVID-19 pandemic model under the harmonic mean type incidence rate	-1	unanswerable	unanswerable	2021
p5hp0q24	p5hp0q24	The current COVID-19 pandemic is leading experts to assess the risks posed by the disease and compare policies geared towards stalling its evolution as a global pandemic. In this setting, the virus' basic reproductive number R_0, which characterizes the average number of secondary cases generated by each primary case, takes on a significant importance in the quantification of the potential scope …	Modeling the Heterogeneity in COVID-19's Reproductive Number and its Impact on Predictive Scenarios	-1	unanswerable	unanswerable	2020-04-11 10:00:00
p6cesrdb	p6cesrdb	Background: The rapid expansion of the current COVID-19 outbreak has caused a global pandemic but how quarantine-based measures can prevent or suppress an outbreak without other more intrusive interventions has not yet been determined. Hong Kong had a massive influx of travellers from mainland China, where the outbreak began, during the early expansion period coinciding with the Lunar New Year fe…	The importance of the timing of quarantine measures before symptom onset to prevent COVID-19 outbreaks - illustrated by Hong Kong's intervention model	1	disease name: COVID-19 location: Hong Kong date: from 18 January to 29 February 2020 R0 value: 0.76 %CI values: 95% CI, 0.66 to 0.86 method: two-layered susceptible-exposed-infectious-quarantined-recovered (SEIQR) meta-population model	[{"contribution":{"disease name": "COVID-19", "location": "Hong Kong", "date": "from 18 January to 29 February 2020", "R0 value": "0.76", "%CI values": "95% CI, 0.66 to 0.86", "method": "two-layered susceptible-exposed-infectious-quarantined-recovered (SEIQR) meta-population model"}}]	2020-05-06
sugedd5n	sugedd5n	BACKGROUND: South Africa implemented rapid and strict physical distancing regulations to minimize SARS-CoV-2 epidemic spread. Evidence on the impact of such measures on interpersonal contact in rural and lower-income settings is limited. METHODS: We compared population-representative social contact surveys conducted in the same rural KwaZulu-Natal location once in 2019 and twice in mid-2020. Resp…	Impact of social distancing regulations and epidemic risk perception on social contact and SARS-CoV-2 transmission potential in rural South Africa: analysis of repeated cross-sectional surveys	0	disease name: SARS-CoV-2 location: KwaZulu-Natal date: between 2019 and June-July 2020 R0 value: - %CI values: - method: age-mixing matrices	[{"contribution":{"disease name": "SARS-CoV-2", "location": "KwaZulu-Natal", "date": "between 2019 and June-July 2020", "R0 value": "-", "%CI values": "-", "method": "age-mixing matrices"}}]	2020-12-03 05:00:00
3ruxk6u2	3ruxk6u2	Transmission of infectious diseases is characterized by the basic reproduction number R0, a metric used to assess the threat posed by an outbreak and inform proportionate preventive decision-making. Based on individual case reports from the initial stage of the coronavirus disease 2019 epidemic, R0 is often estimated to range between 2 and 4. In this report, we show that a SEIR model that properl…	Accounting for super-spreading gives the basic reproduction number R0 of COVID-19 that is higher than initially estimated	1	disease name: coronavirus disease 2019 location: China, United States, and six European countries date: - R0 value: 4.4 - 11.7 %CI values: - method: SEIR model	[{"contribution":{"disease name": "coronavirus disease 2019", "location": "China, United States, and six European countries", "date": "-", "R0 value": "4.4 - 11.7", "%CI values": "-", "method": "SEIR model"}}]	2020-05-01
jchjzhme	jchjzhme	The incubation period and generation time are key characteristics in the analysis of infectious diseases. The commonly used contact-tracing-based estimation of incubation distribution is highly influenced by the individuals' judgment on the possible date of exposure, and might lead to significant errors. On the other hand, interval censoring-based methods are able to utilize a much larger set of …	Estimation of incubation period and generation time based on observed length-biased epidemic cohort with censoring for COVID-19 outbreak in China	1	disease name: COVID-19 location: China date: - R0 value: 2.96 %CI values: 95% CI [2.15; 3.86] method: theory from renewal process is partially adopted by considering the incubation period as the interarrival time, and the duration between departure from Wuhan and onset of symptoms as the mixture of forward time and interarrival time with censored intervals	[{"contribution":{"disease name": "COVID-19", "location": "China", "date": "-", "R0 value": "2.96", "%CI values": "95% CI [2.15; 3.86]", "method": "theory from renewal process is partially adopted by considering the incubation period as the interarrival time, and the duration between departure from Wuhan and onset of symptoms as the mixture of forward time and interarrival time with censored inte…	2020
wdyirrj7	wdyirrj7	The coronavirus (COVID-19) has spread through almost 224 countries and has caused over 5 million deaths. In this paper, we propose a model to study the transmission dynamics of COVID-19 in Ghana using fractional-derivatives. The fractional-derivative is defined in the Atangana Beleanu Caputo (ABC) sense. This model considers seven (7) classes namely; Susceptible individuals, Exposed, Asymptomatic…	A Fractional Differential Equation Modeling of SARS-CoV-2 (COVID-19) Disease in Ghana	0	disease name: COVID-19 location: Ghana date: - R0 value: - %CI values: - method: Fractional Differential Equation Modeling	[{"contribution":{"disease name": "COVID-19", "location": "Ghana", "date": "-", "R0 value": "-", "%CI values": "-", "method": "Fractional Differential Equation Modeling"}}]	2022-01-18 05:00:00
9ykqr0hx	9ykqr0hx	The development and authorization of COVID-19 vaccines has provided the clearest path forward to eliminate community spread hence end the ongoing SARS-CoV-2 pandemic. However, the limited pace at which the vaccine can be administered motivates the question, to what extent must we continue to adhere to social intervention measures such as mask wearing and social distancing? To address this questio…	Interplay between COVID-19 vaccines and social measures for ending the SARS-CoV-2 pandemic	-1	unanswerable	unanswerable	2021
m93p4be6	m93p4be6	BACKGROUND: We examined school reopening policies amidst ongoing transmission of the highly transmissible Delta variant, accounting for vaccination among individuals Ã¢â€°Â¥12 years. METHODS: We collected data on social contacts among school-aged children in the California Bay Area and developed an individual-based transmission model to simulate transmission of the Delta variant of SARS-CoV-2 in …	Model-based assessment of SARS-CoV-2 Delta variant transmission dynamics within partially vaccinated K-12 school populations	-1	unanswerable	unanswerable	2021-11-25
nx2wrguu	nx2wrguu	BACKGROUND: In summer 2014, an autochthonous outbreak of dengue occurred in Tokyo, Japan, in which Yoyogi Park acted as the focal area of transmission. Recognizing the outbreak, concerted efforts were made to control viral spread, which included mosquito control, public announcement of the outbreak, and a total ban on entering the park. We sought to assess the effectiveness of these control measu…	Assessing dengue control in Tokyo, 2014	-1	unanswerable	unanswerable	2019-06-21
t7lqlv41	t7lqlv41	BACKGROUND: As a new emerging infectious disease pandemic, there is an urgent need to understand the dynamics of COVID-19 in each country to inform planning of emergency measures to contain its spread. It is essential that appropriate disease control activities are planned and implemented in a timely manner. Thailand was one of the first countries outside China to be affected with subsequent impo…	Preliminary estimation of temporal and spatiotemporal dynamic measures of COVID-19 transmission in Thailand	1	disease name: COVID-19 location: Thailand date: - R0 value: 2.23-5.90, with a mean of 3.75 %CI values: - method: metric of transmissibility	[{"contribution":{"disease name": "COVID-19", "location": "Thailand", "date": "-", "R0 value": "2.23-5.90, with a mean of 3.75", "%CI values": "-", "method": "metric of transmissibility"}}]	2020-09-24
zqwelqoe	zqwelqoe	During an epidemic, metrics such as R0, doubling time, and case fatality rates are important in understanding and predicting the course of an epidemic. However, if collected over country or regional scales, these metrics hide important smaller-scale, local dynamics. We examine how commonly used epidemiological metrics differ for each individual state within the United States during the initial CO…	State-level variation of initial COVID-19 dynamics in the United States: The role of local government interventions	-1	unanswerable	unanswerable	2020-04-17 10:00:00	keep	234
plt3jx93	plt3jx93	Monitoring the Covid19 pandemic constitutes a critical societal stake that received considerable research efforts. The intensity of the pandemic on a given territory is efficiently measured by the reproduction number, quantifying the rate of growth of daily new infections. Recently, estimates for the time evolution of the reproduction number were produced using an inverse problem formulation with…	Covid19 Reproduction Number: Credibility Intervals by Blockwise Proximal Monte Carlo Samplers	-1	unanswerable	unanswerable	2022-03-17 05:00:00
wyun3wru	wyun3wru	We present an open source model that allows quantitative prediction of the effects of testing on the rate of spread of COVID-19 described by R, the reproduction number, and on the degree of quarantine, isolation and lockdown required to limit it. The paper uses the model to quantify the outcomes of different test types and regimes, and to identify strategies and tests that can reduce the rate of …	COVID 19: Open source model for rapid reduction of R to below 1 in high R0 scenarios (preprint)/ en	-1	unanswerable	unanswerable	-
8nkouqek	8nkouqek	The COVID-19 epidemic has spread massively to almost all countries including Indonesia, in just a few months. An important step to overcoming the spread of the COVID-19 is understanding its epidemiology through mathematical modeling intervention. Knowledge of epidemic dynamics patterns is an important part of making timely decisions and preparing hospitals for the outbreak peak. In this study, we…	The susceptible-infected-recovered-dead model for long-term identification of key epidemiological parameters of COVID-19 in Indonesia	1	disease name: COVID-19 location: Indonesia date: March 2, 2020 to May 15, 2021 R0 value: 7.32 %CI values: - method: susceptible-infected-recovered-dead (SIRD) model	[{"contribution":{"disease name": "COVID-19", "location": "Indonesia", "date": "March 2, 2020 to May 15, 2021", "R0 value": "7.32", "%CI values": "-", "method": "susceptible-infected-recovered-dead (SIRD) model"}}]	2022
f4nn4qat	f4nn4qat	The emergence of severe acute respiratory syndrome coronavirus 2 (SARS-COV-2), which is causing the coronavirus disease-2019 (COVID-19) pandemic, poses a global health threat. However, it is easy to confuse COVID-19 with seasonal influenza in preliminary clinical diagnosis. In this study, the differences between influenza and COVID-19 in epidemiological features, clinical manifestations, comorbid…	Comparison of Clinical Features and Outcomes of Medically Attended COVID-19 and Influenza Patients in a Defined Population in the 2020 Respiratory Virus Season	1	disease name: coronavirus disease-2019 (COVID-19) location: - date: 2020 Respiratory Virus Season R0 value: 2.38 %CI values: - method: -	[{"contribution":{"disease name": "coronavirus disease-2019 (COVID-19)", "location": "-", "date": "2020 Respiratory Virus Season", "R0 value": "2.38", "%CI values": "-", "method": "-"}}]	2021
ommt11mm	ommt11mm	Interrupted time series analyses were conducted to measure the impact of social distancing policies (instituted on March 22, 2020) and of subsequent mandatory masking in the community (instituted on May 4, 2020) on the incidence and effective reproductive number of COVID-19 in SÃƒÂ£o Paulo State, Brazil. Overall, the impact of social distancing both on incidence and Rt was greater than the increm…	Impact of nonpharmaceutical strategies on trends of COVID-19 in SÃƒÂ£o Paulo State	-1	unanswerable	unanswerable	2021-07-27 10:00:00
en96o8zo	en96o8zo	COVID-19 presents a great threat to public health worldwide and the infectious agent SARS-CoV-2 is currently the target of much research aiming at inhibition. The virus' main protease is a dimeric enzyme that has only recently begun to be thoroughly described, opening the door for virtual screening more broadly. Here, a PAIN-filtered flavonoid database was screened against four sites of the prote…	High-Throughput Virtual Screening of 4487 flavonoids: New insights on the structural inhibition of SARS-CoV-2 Main Protease	-1	unanswerable	unanswerable	2020-08-30 10:00:00
wv25xohf	wv25xohf	The emergence of COVID-19 requires new effective tools for epidemiological surveillance. Spatio-temporal disease mapping models, which allow dealing with small units of analysis, are a priority in this context. These models provide geographically detailed and temporally updated overviews of the current state of the pandemic, making public health interventions more effective. These models also all…	Spatio-temporal small area surveillance of the COVID-19 pandemic	-1	unanswerable	unanswerable	2021
5a7ma7nf	5a7ma7nf	The COVID-19 pandemic that emerged in Wuhan China has generated substantial morbidity and mortality impact around the world during the last four months. The daily trend in reported cases has been rapidly rising in Latin America since March 2020 with the great majority of the cases reported in Brazil followed by Peru as of April 15th, 2020. Although Peru implemented a range of social distancing me…	Early transmission dynamics of COVID-19 in a southern hemisphere setting: Lima-Peru: February 29th-March 30th, 2020	1	disease name: COVID-19 location: Lima, Peru date: February 29th-March 30th, 2020 R0 value: 2.3 %CI values: 95% CI: 2.0, 2.5 method: Estimation from daily series of imported and autochthonous cases by the date of symptoms onset	[{"contribution":{"disease name": "COVID-19", "location": "Lima, Peru", "date": "February 29th-March 30th, 2020", "R0 value": "2.3", "%CI values": "95% CI: 2.0, 2.5", "method": "Estimation from daily series of imported and autochthonous cases by the date of symptoms onset"}}]	2020
z6u4fjcz	z6u4fjcz	This paper presents a study of early epidemiological assessment of COVID-19 transmission dynamics in Indonesia. The aim is to quantify heterogeneity in the numbers of secondary infections. To this end, we estimate the basic reproduction number [Formula: see text] and the overdispersion parameter [Formula: see text] at two regions in Indonesia: Jakarta-Depok and Batam. The method to estimate [Form…	Superspreading in early transmissions of COVID-19 in Indonesia	1	disease name: COVID-19 location: Indonesia: Jakarta-Depok and Batam date: - R0 value: 6.79 and 2.47 %CI values: - method: sequential Bayesian method, while the parameter [Formula: see text] is estimated by fitting the secondary case data with a negative binomial distribution	[{"contribution":{"disease name": "COVID-19", "location": "Indonesia: Jakarta-Depok and Batam", "date": "-", "R0 value": "6.79 and 2.47", "%CI values": "-", "method": "sequential Bayesian method, while the parameter [Formula: see text] is estimated by fitting the secondary case data with a negative binomial distribution"}}]	2020
3idpta01	3idpta01	Extreme public health interventions play a critical role in mitigating the local and global prevalence and pandemic potential of COVID-19. Here, we use population size for pathogen transmission to measure the intensity of public health interventions, which is a key characteristic variable for nowcasting and forecasting of the epidemic. By formulating a hidden Markov dynamic system and using nonli…	The Effect of Population Size for Pathogen Transmission on Prediction of COVID-19 Pandemic Spread	1	disease name: COVID-19 location: China date: - R0 value: 2.46 %CI values: (95% CI: 2.41-2.51) method: unscented filter and an interacting multiple model filter. | disease name: COVID-19 location: the rest of the globe except China (GEC) date: - R0 value: 3.64 %CI values: (95% CI: (3.55-3.72) method: unscented filter and an interacting multiple model filter.	[{"contribution":{"disease name": "COVID-19", "location": "China", "date": "-", "R0 value": "2.46", "%CI values": "(95% CI: 2.41-2.51)", "method": "unscented filter and an interacting multiple model filter."}},{"contribution":{"disease name": "COVID-19", "location": "the rest of the globe except China (GEC)", "date": "-", "R0 value": "3.64", "%CI values": "(95% CI: (3.55-3.72)", "method": "unscen…	2020-04-22 10:00:00		420
pb1ackse	pb1ackse	Modern transportation plays a key role in the long-distance and rapid spread of SARS-CoV-2. However, little is known about the transmission risk of SARS-CoV-2 on confined vehicles, such as airplanes and trains. Based on the itinerary and epidemiological data of COVID-19 cases and close contacts among 9,265 airline passengers on 291 airplanes and 29,335 passengers on 830 high-speed trains in China…	Transmission risk of SARS-CoV-2 on airplanes and high-speed trains	1	disease name: COVID-19 location: China (on airplanes) date: December 20, 2019 to March 17, 2020 R0 value: 0.12 to 0.19 %CI values: - method: - | disease name: COVID-19 location: China (on trains) date: December 20, 2019 to March 17, 2020 R0 value: from 0.07 to 0.12 %CI values: - method: -	[{"contribution":{"disease name": "COVID-19", "location": "China (on airplanes)", "date": "December 20, 2019 to March 17, 2020", "R0 value": "0.12 to 0.19", "%CI values": "-", "method": "-"}},{"contribution":{"disease name": "COVID-19", "location": "China (on trains)", "date": "December 20, 2019 to March 17, 2020", "R0 value": "from 0.07 to 0.12", "%CI values": "-", "method": "-"}}]	2020-12-22		1503
9vcyvone	9vcyvone	The pandemic of COVID-19 signaled an alert to all countries about controlling transmission of SARS-Cov-2 to have fewer infected individuals, making less stress to all health systems and saving lives. As a result, multiple governments, including national and local levels of government, went through several degrees of social distancing measures. The decision process about when to lift social distan…	How limitations in data of health surveillance impact decision making in the COVID-19 epidemic (preprint)/ pt	-1	unanswerable	unanswerable	-
sqapupra	sqapupra	This study aimed to explore a co-infection transmission model between Covid-19 and Rubella that involves administering vaccinations for both diseases. These two diseases not only have the same characteristics, but also has the same pattern in terms of the causes of disease, spread, clinical manifestations, and vaccines as prevention efforts. This model provided answers to the question of whether …	Co-infection Model for Covid-19 and Rubella with Vaccination Treatment: Stability and Threshold	0	disease name: Covid-19 and Rubella location: - date: - R0 value: - %CI values: - method: next generation matrix	[{"contribution":{"disease name": "Covid-19 and Rubella", "location": "-", "date": "-", "R0 value": "-", "%CI values": "-", "method": "next generation matrix"}}]	2022
6lo013es	6lo013es	We studied the COVID-19 pandemic evolution in selected African countries. For each country considered, we modeled simultaneously the data of the active, recovered and death cases. In this study, we used a year of data since the first cases were reported. We estimated the time-dependent basic reproduction numbers, [Formula: see text] , and the fractions of infected but unaffected populations, to o…	A model of COVID-19 pandemic evolution in African countries	-1	unanswerable	unanswerable	2021-09-26 10:00:00
rheyp33n	rheyp33n	The world is currently facing a pandemic called COVID-19 which has drastically changed our human lifestyle, affecting it badly. The lifestyle and the thought processes of every individual have changed with the current situation. This situation was unpredictable, and it contains a lot of uncertainties. In this paper, the authors have attempted to predict and analyze the disease along with its rela…	A systematic approach for COVID-19 predictions and parameter estimation	-1	unanswerable	unanswerable	2020
z41yiygc	z41yiygc	An epidemiological study of deaths is carried out in a dozen countries by analyzing the first wave of the COVID-19 pandemic. These countries are among those most affected by the first wave, i.e. where daily-death data series may closely resemble a solution of the basic SIR equations. The SIR equations are solved parametrically using the proper time as parameter. Some general properties of the SIR…	Systematic description of COVID-19 pandemic using exact SIR solutions and Gumbel distributions	-1	unanswerable	unanswerable	2022-04-26
84msbkhl	84msbkhl	There is no report on the serial interval (SI) of coronavirus disease 2019 (COVID-19) in Iran, the present report aims to estimate the SI and time-varying R of COVID-19 in western Iran. In this study, there were 1477 confirmed, probable and suspected cases of severe acute respiratory syndrome coronavirus 2 for Kermanshah from 22 February to 9 April. The close contacts of the confirmed cases were …	Serial interval and time-varying reproduction number estimation for COVID-19 in western Iran	-1	unanswerable	unanswerable	2020
uu09wrgz	uu09wrgz	Background: Since the outbreak of the COVID-19 pandemic, multiple efforts of modelling of the geo-temporal transmissibility of the virus have been undertaken, but none describes the pandemic spread at the global level. The aim of this research is to provide a high-resolution global model of the pandemic that overcomes the problem of biased country-level data on the number of infected cases. To ac…	From the index case to global spread: The global mobility based modelling of the COVID-19 pandemic implies higher infection rate and lower detection ratio than current estimates	1	disease name: COVID-19 location: global date: 17 November 2019 R0 value: 4.4 %CI values: - method: modified SIR metapopulation transmission model and parameterized it analytically	[{"contribution":{"disease name": "COVID-19", "location": "global", "date": "17 November 2019", "R0 value": "4.4", "%CI values": "-", "method": "modified SIR metapopulation transmission model and parameterized it analytically"}}]	2020
otfqszq8	otfqszq8	BackgroundRecent evidence indicates a potential therapeutic role of fluvoxamine for COVID-19. In the TOGETHER randomized platform clinical trial for acutely symptomatic patients with COVID-19, we assessed the efficacy of fluvoxamine vs. placebo in preventing either extended emergency room observation or hospitalization due to COVID-19. Herein, we report the preliminary findings. MethodsThis place…	Effect of Early Treatment with Fluvoxamine on Risk of Emergency Care and Hospitalization among Patients with Covid-19: the Together Randomized Platform Clinical Trial	-1	unanswerable	unanswerable	2021
kjtm68yk	kjtm68yk	BACKGROUND: Many countries worldwide are faced with the choice between the (re)surgence of COVID-19 and endangering the economic and mental well-being of their citizens. While infection numbers are monitored and measures adjusted, a systematic strategy for balancing contact restrictions and socioeconomic life in the absence of a vaccine is currently lacking. METHODS: In a mathematical model, we d…	Local measures enable COVID-19 containment with fewer restrictions due to cooperative effects	-1	unanswerable	unanswerable	2021-01-07 05:00:00
rs6m1pu8	rs6m1pu8	Non-pharmaceutical interventions (NPIs) including resource allocation, risk communication, social distancing and travel restriction, are mainstream actions to control the spreading of Coronavirus disease 2019 (COVID-19) worldwide. Different countries implemented their own combinations of NPIs to prevent local epidemics and healthcare system overloaded. Portfolios, as temporal sets of NPIs have va…	COVID-19 non-pharmaceutical intervention portfolio effectiveness and risk communication predominance	-1	unanswerable	unanswerable	2021
fimtdym3	fimtdym3	In this paper, we propose a proxy of the R0 (reproductive number) of COVID-19 by computing the entropy of the mobility graph during the first peak of the pandemic. The study was performed by the COVID-19 Data Science Task Force at the Comunidad Valenciana (Spain) during 70 days. Since mobility graphs are naturally attributed, directed and become more and more disconnected as more and more non-pha…	The Entropy of Graph Embeddings: A Proxy of Potential Mobility in Covid19 Outbreaks	-1	unanswerable	unanswerable	2021
jxydz0ra	jxydz0ra	To understand the characteristics and influencing factors related to cluster infections in Jiangsu Province, China, we investigated case reports to explore transmission dynamics and influencing factors of scales of cluster infection. The effectiveness of interventions was assessed by changes in the time-dependent reproductive number (R(t)). From 25th January to 29th February, Jiangsu Province rep…	Epidemiologic characteristics and influencing factors of cluster infection of COVID-19 in Jiangsu Province	-1	unanswerable	unanswerable	2021-02-10 05:00:00
yjmru8x8	yjmru8x8	Public transport is a fundamental service for the resumption of work and production, but the enclosed environment and dense population create very favorable conditions for the spread of epidemic infections. Thus, effective public health interventions are urgently introduced. The objective of this paper is to quantitatively estimate the SARS-CoV-2 transmission probability and evaluate the influenc…	Estimation of the SARS-CoV-2 transmission probability in confined traffic space and evaluation of the mitigation strategies	0	disease name: SARS-CoV-2 location: Diamond Princess Cruise Ship date: - R0 value: - %CI values: - method: -	[{"contribution":{"disease name": "SARS-CoV-2", "location": "Diamond Princess Cruise Ship", "date": "-", "R0 value": "-", "%CI values": "-", "method": "-"}}]	2021
nr40x5n2	nr40x5n2	While the coronavirus disease 2019 (COVID-19) outbreak has been ongoing in Korea since January 2020, there were limited transmissions during the early stages of the outbreak. In the present study, we aimed to provide a statistical characterization of COVID-19 transmissions that led to this small outbreak. We collated the individual data of the first 28 confirmed cases reported from 20 January to …	Subcritical Transmission in the Early Stage of COVID-19 in Korea	1	disease name: coronavirus disease 2019 (COVID-19) location: Korea date: from 20 January to 10 February 2020 R0 value: 0.4 %CI values: 95% CI: 0.16, 0.99 method: renewal equation, which allows for the transmissibility to differ between imported and locally transmitted cases	[{"contribution":{"disease name": "coronavirus disease 2019 (COVID-19)", "location": "Korea", "date": "from 20 January to 10 February 2020", "R0 value": "0.4", "%CI values": "95% CI: 0.16, 0.99", "method": "renewal equation, which allows for the transmissibility to differ between imported and locally transmitted cases"}}]	2021
i8gk3xi1	i8gk3xi1	The Democratic Republic of Congo (DRC) experienced a confined rural outbreak of Ebola virus disease (EVD) with 69 reported cases from July to October 2014. Understanding the transmission dynamics during the outbreak can provide important information for anticipating and controlling future EVD epidemics. I fitted an EVD transmission model to previously published data of this outbreak and estimated…	Rapid drop in the reproduction number during the Ebola outbreak in the Democratic Republic of Congo	1	disease name: Ebola virus disease (EVD) location: Democratic Republic of Congo (DRC) date: July to October 2014 R0 value: 5.2 %CI values: 95% CI [4.0-6.7] method: EVD transmission model	[{"contribution":{"disease name": "Ebola virus disease (EVD)", "location": "Democratic Republic of Congo (DRC)", "date": "July to October 2014", "R0 value": "5.2", "%CI values": "95% CI [4.0-6.7]", "method": "EVD transmission model"}}]	2015-11-19 05:00:00
imtsrg3s	imtsrg3s	INTRODUCTION: There are significant differences in the active cases and fatality rates of Covid-19 for different European countries. METHODOLOGY: The present study employs Monte Carlo based transmission growth simulations for Italy, Germany and Turkey. The probabilities of transmission at home, work and social networks and the number of initial cases have been calibrated to match the basic reprod…	Transmission dynamics of Covid-19 in Italy, Germany and Turkey considering social distancing, testing and quarantine	1	disease name: Covid-19 location: Italy, Germany, Turkey date: - R0 value: about 1.3 from 2.8 %CI values: - method: Monte Carlo based transmission growth simulations	[{"contribution":{"disease name": "Covid-19", "location": "Italy, Germany, Turkey", "date": "-", "R0 value": "about 1.3 from 2.8", "%CI values": "-", "method": "Monte Carlo based transmission growth simulations"}}]	2020
rr8h5dgy	rr8h5dgy	We propose a population approach to model the beginning of the French COVID-19 epidemic at the regional level. We rely on an extended Susceptible-Exposed-Infectious-Recovered (SEIR) mechanistic model, a simplified representation of the average epidemic process. Combining several French public datasets on the early dynamics of the epidemic, we estimate region-specific key parameters conditionally …	Population modeling of early COVID-19 epidemic dynamics in French regions and estimation of the lockdown impact on infection rate	1	disease name: COVID-19 location: French regions date: May 11th, 2020 R0 value: before isolation (between 2.4 and 3.1) %CI values: - method: extended Susceptible-Exposed-Infectious-Recovered (SEIR) mechanistic model	[{"contribution":{"disease name": "COVID-19", "location": "French regions", "date": "May 11th, 2020", "R0 value": "before isolation (between 2.4 and 3.1)", "%CI values": "-", "method": "extended Susceptible-Exposed-Infectious-Recovered (SEIR) mechanistic model"}}]	2020-04-24
i3ob59ya	i3ob59ya	Background and objectives: Public health interventions have reduced coronavirus disease 2019 (COVID-19) transmission in several countries, but their impacts on COVID-19 epidemics in the USA are unclear. We examined associations of stay-at-home order (SAHO) and face-masking recommendation with COVID-19 epidemics in the USA. Methods: In this quasi-experimental interrupted time-series study, we mode…	Associations of Stay-at-Home Order and Face-Masking Recommendation with Trends in Daily New Cases and Deaths of Laboratory-Confirmed COVID-19 in the United States	-1	unanswerable	unanswerable	2020
qbf90bso	qbf90bso	Background: COVID-19 epidemic has been widely spread all over the world. During it appears in China, Chinese government quickly put forward and implement prevention and control measures to keep its spread within limits. This study aims to investigate the impacts of the prevention and control measures in controlling COVID-19 epidemic in China, so as to give a clue to control its spread in the worl…	Modeling and Reviewing Study to the COVID-19 Epidemic in PR China	1	disease name: COVID-19 location: Hubei Province date: 2020 (before lockdown of Wuhan city) R0 value: 3.2035 %CI values: - method: least square method is used to estimate the parameters of SEIR derived model and the proposed SEIRQH model	[{"contribution":{"disease name": "COVID-19", "location": "Hubei Province", "date": "2020 (before lockdown of Wuhan city)", "R0 value": "3.2035", "%CI values": "-", "method": "least square method is used to estimate the parameters of SEIR derived model and the proposed SEIRQH model"}}]	2020		1263
5wn261n6	5wn261n6	In this policy paper, we implement the epidemiological SIR to estimate the basic reproduction number $\mathcal{R}_0$ at national and state level. We also developed the statistical machine learning model to predict the cases ahead of time. Our analysis indicates that the situation of Punjab ($\mathcal{R}_0\approx 16$) is not good. It requires immediate aggressive attention. We see the $\mathcal{R}…	Prediction of COVID-19 Disease Progression in India : Under the Effect of National Lockdown	1	disease name: COVID-19 location: India date: 04 March, 2020 R0 value: 2.75 %CI values: - method: epidemiological SIR	[{"contribution":{"disease name": "COVID-19", "location": "India", "date": "04 March, 2020", "R0 value": "2.75", "%CI values": "-", "method": "epidemiological SIR"}}]	2020
44hle6mh	44hle6mh	Since November 6$^{\mathrm{th}}$, 2020, Italian regions have been classified according to four levels, corresponding to specific risk scenarios, for which specific restrictive measures have been foreseen. By analyzing the time evolution of the reproduction number $R_t$, we estimate how much different restrictive measures affect $R_t$, and we quantify the combined effect of the diffusion of virus …	Study on the effects of the restrictive measures for containment of the COVID-19 pandemic on the reproduction number $R_t$ in Italian regions	-1	unanswerable	unanswerable	2021-06-01 10:00:00
5ng1vy7y	5ng1vy7y	The risk for severe illness and mortality from COVID-19 significantly increases with age. As a result, age-stratified modeling for COVID-19 dynamics is the key to study how to reduce hospitalizations and mortality from COVID-19. By taking advantage of network theory, we develop an age-stratified epidemic model for COVID-19 in complex contact networks. Specifically, we present an extension of stan…	Age-Stratified COVID-19 Spread Analysis and Vaccination: A Multitype Random Network Approach	-1	unanswerable	unanswerable	2021
snv5x0so	snv5x0so	BACKGROUND: The epidemiological importance of asymptomatic individuals who would never develop illness, compared to those who eventually develop symptoms, has yet to be fully clarified. METHODS: The very first cluster data in Tokyo and Kanagawa (n = 36) were analyzed. Movement of all close contact was restricted for 14 days and they underwent laboratory testing with polymerase chain reaction. The…	Transmissibility of asymptomatic COVID-19: Data from Japanese clusters	1	disease name: COVID-19 location: Tokyo and Kanagawa date: - R0 value: 1.2 %CI values: 95% confidence interval (CI): 0.5-2.9 method: -	[{"contribution":{"disease name": "COVID-19", "location": "Tokyo and Kanagawa", "date": "-", "R0 value": "1.2", "%CI values": "95% confidence interval (CI): 0.5-2.9", "method": "-"}}]	2021
2oh5ksvx	2oh5ksvx	We consider the problem of estimating the reproduction number $R_t$ of an epidemic for populations where the probability of detection of cases depends on a known covariate. We argue that in such cases the normal empirical estimator can fail when the prevalence of cases among groups changes with time. We propose a Bayesian strategy to resolve the problem, as well as a simple solution in the case o…	Systematic errors in estimates of $R_t$ from symptomatic cases in the presence of observation bias	-1	unanswerable	unanswerable	2020
n5wwiet2	n5wwiet2	The first mitigation response to the Covid-19 pandemic was to limit person-to-person interaction as much as possible. This was implemented by the temporary closing of many workplaces and people were required to follow social distancing. Networks are a great way to represent interactions among people and the temporary severing of these interactions. Here, we present a network model of human-human …	Network model and analysis of the spread of Covid-19 with social distancing	-1	unanswerable	unanswerable	2020
802x26ap	802x26ap	Control of norovirus outbreaks relies on enhanced hygiene measures, such as handwashing, surface cleaning, using disposable paper towels, and using separate toilets for sick and well persons. However, little is known about their effectiveness in limiting further spread of norovirus infections. We analyzed norovirus outbreaks in 7 camps at an international scouting jamboree in the Netherlands duri…	Enhanced hygiene measures and norovirus transmission during an outbreak.	-1	unanswerable	unanswerable	2009
gmi1ewc2	gmi1ewc2	Background: An outbreak of the novel coronavirus SARS-CoV-2 has led to 46,997 confirmed cases as of 13th February 2020. Understanding the early transmission dynamics of the infection and evaluating the effectiveness of control measures is crucial for assessing the potential for sustained transmission to occur in new areas. Methods: We combined a stochastic transmission model with data on cases of…	Early dynamics of transmission and control of COVID-19: a mathematical modelling study	-1	unanswerable	unanswerable	2020-02-02 05:00:00
k2834etw	k2834etw	The first cases of COVID-19 in France were detected on January 24, 2020. The number of screening tests carried out and the methodology used to target the patients tested do not allow for a direct computation of the real number of cases and the mortality rate.In this report, we develop a 'mechanistic-statistical' approach coupling a SIR ODE model describing the unobserved epidemiological dynamics,…	Using early data to estimate the actual infection fatality ratio from COVID-19 in France (Running title: Infection fatality ratio from COVID-19)	1	disease name: COVID-19 location: France date: - R0 value: 4.8 %CI values: - method: 'mechanistic-statistical' approach coupling a SIR ODE model describing the unobserved epidemiological dynamics, a probabilistic model describing the data acquisition process and a statistical inference method	[{"contribution":{"disease name": "COVID-19", "location": "France", "date": "-", "R0 value": "4.8", "%CI values": "-", "method": "'mechanistic-statistical' approach coupling a SIR ODE model describing the unobserved epidemiological dynamics, a probabilistic model describing the data acquisition process and a statistical inference method"}}]	2020
ss1r7ljj	ss1r7ljj	Owing to the frequent travel connections between Wuhan and Zhejiang, Zhejiang was the third worst-affected province in China with 1,205 cases confirmed before 26 February 2020. The transmissibility of the 2019 novel coronavirus disease was monitored in Zhejiang, accounting for the transmissions from imported cases. Even though Zhejiang was one of the worst-affected provinces, an interruption of d…	Monitoring disease transmissibility of 2019 novel coronavirus disease in Zhejiang, China	-1	unanswerable	unanswerable	2020
ikpo7sal	ikpo7sal	Background: Local estimates of the time-varying effective reproduction number (Rt) of COVID-19 in England became increasingly heterogeneous during April and May 2021. This may have been attributable to the spread of the Delta SARS-CoV-2 variant. This paper documents real-time analysis that aimed to investigate the association between changes in the proportion of positive cases that were S-gene po…	Estimating the increase in reproduction number associated with the Delta variant using local area dynamics in England	-1	unanswerable	unanswerable	2021-12-02 05:00:00
oxjeyw5i	oxjeyw5i	Modeling of infectious diseases is essential to comprehend dynamic behavior for the transmission of an epidemic. This research study consists of a newly proposed mathematical system for transmission dynamics of the measles epidemic. The measles system is based upon mass action principle wherein human population is divided into five mutually disjoint compartments: susceptible S(t)Ã¢â‚¬â€vaccinate…	Mathematical analysis for a new nonlinear measles epidemiological system using real incidence data from Pakistan	-1	unanswerable	unanswerable	2020-04-28
kc62suus	kc62suus	The dynamics that lead to the spread of an infectious disease through a population can be characterized as a complex system. One way to model such a system, in order to improve preparedness, and learn more about how an infectious disease, such as COVID-19, might spread through a population, is agent-based epidemiological modelling. When a pandemic is caused by an emerging disease, it takes time t…	Adapting an Agent-Based Model of Infectious Disease Spread in an Irish County to COVID-19	-1	unanswerable	unanswerable	2021
debrs1iq	debrs1iq	OBJECTIVES: In South Korea, 13 745 cases of coronavirus disease (COVID-19) had been reported as of 19 July, 2020. To examine spatiotemporal changes in the transmission potential, we aimed to present regional estimates of the doubling time and reproduction number (Rt) for COVID-19 in the country. METHODS: Daily series of confirmed COVID-19 cases in the most affected regions were extracted from pub…	Spatial variability in reproduction number and doubling time across two waves of the COVID-19 pandemic in South Korea, February to July, 2020	-1	unanswerable	unanswerable	2020
gqw815xx	gqw815xx	In a move described as unprecedented in public health history, starting 24 January 2020, China imposed quarantine and isolation restrictions in Wuhan, a city of more than 10 million people. This raised the question: is mass quarantine and isolation effective as a social tool in addition to its scientific use as a medical tool? In an effort to address this question, using a epidemiological model d…	Neural Network aided quarantine control model estimation of COVID spread in Wuhan, China	-1	unanswerable	unanswerable	2020-03-18 05:00:00
mmh5c904	mmh5c904	Herein, we provide estimations for the effective reproduction number $R_e$ for the greater metropolitan area of Athens, Greece during the first wave of the pandemic (February 26-May 15, 2020). For our calculations, we implemented, in a comparative approach, the two most widely used methods for the estimation of $R_e$, that by Wallinga and Teunis and by Cori et al. Data were retrieved from the nat…	Estimation of the effective reproduction number for SARS-CoV-2 infection during the first epidemic wave in the metropolitan area of Athens, Greece	-1	unanswerable	unanswerable	2020
ssdx8xwi	ssdx8xwi	Since the first suspected case of coronavirus disease-2019 (COVID-19) on December 1st, 2019, in Wuhan, Hubei Province, China, a total of 40,235 confirmed cases and 909 deaths have been reported in China up to February 10, 2020, evoking fear locally and internationally. Here, based on the publicly available epidemiological data for Hubei, China from January 11 to February 10, 2020, we provide esti…	Data-Based Analysis, Modelling and Forecasting of the COVID-19 outbreak	1	disease name: Coronavirus Disease-2019 (COVID-19) location: Hubei, China date: 11th of January until the 18th of January R0 value: 4.6 %CI values: - method: Susceptible-Infected-Recovered-Dead (SIDR) model, (based on official counts of confirmed cases) | disease name: Coronavirus Disease-2019 (COVID-19) location: Hubei, China date: 11th of January until the 18th of January R0 value: 3.2 %CI value…	[{"contribution":{"disease name": "Coronavirus Disease-2019 (COVID-19)", "location": "Hubei, China", "date": "11th of January until the 18th of January", "R0 value": "4.6", "%CI values": "-", "method": "Susceptible-Infected-Recovered-Dead (SIDR) model, (based on official counts of confirmed cases)"}},{"contribution":{"disease name": "Coronavirus Disease-2019 (COVID-19)", "location": "Hubei, China…	2020-02-13 05:00:00		1150
4c665f08	4c665f08	Epidemiological figures of the SARS-CoV-2 epidemic in Italy are higher than those observed in China. Our objective was to model the SARS-CoV-2 outbreak progression in Italian regions vs. Lombardy to assess the epidemic's progression. Our setting was Italy, and especially Lombardy, which is experiencing a heavy burden of SARS-CoV-2 infections. The peak of new daily cases of the epidemic has been r…	Covid-19 Outbreak Progression in Italian Regions: Approaching the Peak by the End of March in Northern Italy and First Week of April in Southern Italy	1	disease name: Covid-19 location: Lombardy date: April 23rd R0 value: 3.6 %CI values: - method: susceptible-exposed-infected-removed (SEIR) compartment model | disease name: Covid-19 location: Piedmont, Veneto, Emilia Romagna, Tuscany and Marche date: - R0 value: 3.5 %CI values: - method: susceptible-exposed-infected-removed (SEIR) compartment model | disease name: Covid-19 location: Lazio date: -…	[{"contribution":{"disease name": "Covid-19", "location": "Lombardy", "date": "April 23rd", "R0 value": "3.6", "%CI values": "-", "method": "susceptible-exposed-infected-removed (SEIR) compartment model"}},{"contribution":{"disease name": "Covid-19", "location": "Piedmont, Veneto, Emilia Romagna, Tuscany and Marche", "date": "-", "R0 value": "3.5", "%CI values": "-", "method": "susceptible-expose…	2020	keep	1031
6gmrqg4v	6gmrqg4v	PURPOSE: To analyze the epidemiologic characteristics of an outbreak of human adenovirus type 54 (HAdV-54) on Oki Island, Shimane Prefecture, Japan, in 2017 and to assess the effectiveness of a compartmentalization method in controlling the incidence and spread. STUDY DESIGN: Retrospective cohort study. METHODS: The infection was diagnosed in 136 individuals, and typing was confirmed by PCR and d…	Efficacy of compartmentalization in controlling an adenovirus type 54 keratoconjunctivitis outbreak on Oki Island, Japan	1	disease name: human adenovirus type 54 (HAdV-54) location: Oki Island, Shimane Prefecture, Japan date: - R0 value: 1.43 %CI values: - method: -	[{"contribution":{"disease name": "human adenovirus type 54 (HAdV-54)", "location": "Oki Island, Shimane Prefecture, Japan", "date": "-", "R0 value": "1.43", "%CI values": "-", "method": "-"}}]	2021-02-25 05:00:00
wp6k5dgt	wp6k5dgt	Domestic cats are susceptible to SARS-CoV-2 virus infection and given that they are in close contact with people, assessing the potential risk cats represent for the transmission and maintenance of SARS-CoV-2 is important. Assessing this risk implies quantifying transmission from humans-to-cats, from cats-to-cats and from cats-to-humans. Here we quantified the risk of cat-to-cat transmission by r…	The SARS-CoV-2 reproduction number R0 in cats	1	disease name: SARS-CoV-2 location: Domestic cats date: - R0 value: significantly higher than 1 %CI values: - method: Review of published literature describing transmission either experimentally or under natural conditions in infected households.	[{"contribution":{"disease name": "SARS-CoV-2", "location": "Domestic cats", "date": "-", "R0 value": "significantly higher than 1", "%CI values": "-", "method": "Review of published literature describing transmission either experimentally or under natural conditions in infected households."}}]	2021-07-20
5nvcu8vz	5nvcu8vz	The epidemic of the coronavirus disease 2019 (COVID-19) has been rising rapidly and life-threatening worldwide since its inception. The lack of an established vaccine for this disease has caused millions of illnesses and hundreds of thousands of deaths globally. Mathematical models have become crucial tools in determining the potential and seriousness of the disease and in helping the types of st…	Mathematical Modelling and Analysis of COVID-19 Epidemic and Predicting its Future Situation in Ethiopia.	0	disease name: coronavirus disease 2019 (COVID-19) location: Ethiopia date: between March and June 2020 R0 value: - %CI values: - method: compartmental epidemic model of COVID-19	[{"contribution":{"disease name": "coronavirus disease 2019 (COVID-19)", "location": "Ethiopia", "date": "between March and June 2020", "R0 value": "-", "%CI values": "-", "method": "compartmental epidemic model of COVID-19"}}]	2021-01-29
ety31hy9	ety31hy9	Most countries are suffering severely from the ongoing covid-19 pandemic despite various levels of preventive measures. A common question is if and when a country or region will reach herd immunity $h$. The classical herd immunity level $h_C$ is defined as $h_C=1-1/R_0$, where $R_0$ is the basic reproduction number, for covid-19 estimated to lie somewhere in the range 2.2-3.5 depending on country…	The disease-induced herd immunity level for Covid-19 is substantially lower than the classical herd immunity level	-1	unanswerable	unanswerable	2020-05-06 10:00:00
s5y4fob8	s5y4fob8	Background We aimed to describe pre-existing factors associated with severe disease, primarily admission to critical care, and death secondary to SARS-CoV-2 infection in hospitalised children and young people (CYP), within a systematic review and individual patient meta-analysis. Methods We searched Pubmed, European PMC, Medline and Embase for case series and cohort studies published between 1st …	Which children and young people are at higher risk of severe disease and death after hospitalisation with SARS-CoV-2 infection in children and young people: A systematic review and individual patient meta-analysis	-1	unanswerable	unanswerable	2022-02-28 05:00:00
hnljxtyu	hnljxtyu	Estimating the basic reproduction number of a pandemic and the changes that appear on this value over time provide a good understanding of the contagious nature of the virus and efficiency of the controlling strategies. In this paper, we focus on studying the basic reproduction number (R(0)) for two important variants of COVID-19 pandemic in Iran: Alpha and Delta variants. We use four different m…	Estimation of the basic reproduction number of Alpha and Delta variants of COVID-19 pandemic in Iran	1	disease name: COVID-19 Alpha variant location: Iran date: March 10, 2021 until June 10, 2021 R0 value: 0.9999 %CI values: (95% CI: 0.9994-1) method: Exponential Growth Rate (EGR) | disease name: COVID-19 Alpha variant location: Iran date: March 10, 2021 until June 10, 2021 R0 value: 1.046 %CI values: (95% CI: 1.044-1.049) method: Maximum Likelihood (ML) | disease name: COVID-19 Alpha variant loca…	[{"contribution":{"disease name": "COVID-19 Alpha variant", "location": "Iran", "date": "March 10, 2021 until June 10, 2021", "R0 value": "0.9999", "%CI values": "(95% CI: 0.9994-1)", "method": "Exponential Growth Rate (EGR)"}},{"contribution":{"disease name": "COVID-19 Alpha variant", "location": "Iran", "date": "March 10, 2021 until June 10, 2021", "R0 value": "1.046", "%CI values": "(95% CI: 1…	2022-05-17		1296
ivl5i3kz	ivl5i3kz	An important determinant of a pathogen's success is the rate at which it is transmitted from infected to susceptible hosts. Although there are anecdotal reports that methicillin-resistant Staphylococcus aureus (MRSA) clones vary in their transmissibility in hospital settings, attempts to quantify such variation are lacking for common subtypes, as are methods for addressing this question using rou…	Quantifying Type-Specific Reproduction Numbers for Nosocomial Pathogens: Evidence for Heightened Transmission of an Asian Sequence Type 239 MRSA Clone	-1	unanswerable	unanswerable	2012-04-12
9wrs6dyw	9wrs6dyw	COVID-19 is a respiratory illness caused by an RNA virus prone to mutations. In December 2020, variants with different characteristics that could affect transmissibility emerged around the world. To address this new dynamic of the disease, we formulate and analyze a mathematical model of a two-strain COVID- 19 transmission dynamics with strain 1 vaccination. The model is theoretically analyzed an…	Dynamic of a two-strain COVID-19 model with vaccination (preprint)	-1	unanswerable	unanswerable	2021
yomvowae	yomvowae	In the paper, we propose a semiparametric framework for modeling the COVID-19 pandemic. The stochastic part of the framework is based on Bayesian inference. The model is informed by the actual COVID-19 data and the current epidemiological findings about the disease. The framework combines many available data sources (number of positive cases, number of patients in hospitals and in intensive care,…	Modeling COVID-19 pandemic using Bayesian analysis with application to Slovene data	0	disease name: SARS-CoV-2 location: Slovenia date: - R0 value: - %CI values: - method: a semiparametric framework for modeling the COVID-19 pandemic. The stochastic part of the framework is based on Bayesian inference	[{"contribution":{"disease name": "SARS-CoV-2", "location": "Slovenia", "date": "-", "R0 value": "-", "%CI values": "-", "method": "a semiparametric framework for modeling the COVID-19 pandemic. The stochastic part of the framework is based on Bayesian inference"}}]	2020
w71814tk	w71814tk	Currently, the outbreak of COVID-19 is rapidly spreading especially in Wuhan city, and threatens 14 million people in central China. In the present study we applied the Moran index, a strong statistical tool, to the spatial panel to show that COVID-19 infection is spatially dependent and mainly spread from Hubei Province in Central China to neighbouring areas. Logistic model was employed accordin…	Spatial-temporal distribution of COVID-19 in China and its prediction: A data-driven modeling analysis.	1	disease name: COVID-19 location: China date: - R0 value: 2.23 - 2.51 %CI values: - method: SEIR Model	[{"contribution":{"disease name": "COVID-19", "location": "China", "date": "-", "R0 value": "2.23 - 2.51", "%CI values": "-", "method": "SEIR Model"}}]	2020-03-31
ramd5lit	ramd5lit	We propose a compartmental disease transmission model with an asymptomatic (or subclinical) infective class to study the role of asymptomatic infection in the transmission dynamics of infectious diseases with asymptomatic infectives, e.g., influenza. Analytical results are obtained using the respective ratios of susceptible, exposed (incubating), and asymptomatic classes to the clinical symptomat…	On the Role of Asymptomatic Infection in Transmission Dynamics of Infectious Diseases	-1	unanswerable	unanswerable	2007-08-15
lm4hvmfi	lm4hvmfi	Syria has experienced armed conflict since 2011, and the provision of health care has been severely compromised due to the hostilities. At the time of writing, Northwest Syria (NWS) was outside governmental control and faced the challenges of the COVID-19 outbreak. Since the emergence of this disease, several studies have looked at the dynamics of COVID-19 transmission, predicted its progression,…	Simulation of the Progression of the COVID-19 Outbreak in Northwest Syria Using a Basic and Adjusted SIR Model	1	disease name: COVID-19 location: Northwest Syria date: from July 2020 to March 2021 R0 value: 2.38 %CI values: - method: Suspected-Infected-Removed (SIR) Model	[{"contribution":{"disease name": "COVID-19", "location": "Northwest Syria", "date": "from July 2020 to March 2021", "R0 value": "2.38", "%CI values": "-", "method": "Suspected-Infected-Removed (SIR) Model"}}]	2022
5x1xwyov	5x1xwyov	SARS-CoV-2 rapidly spread from a regional outbreak to a global pandemic in just a few months. Global research efforts have focused on developing effective vaccines against COVID-19. However, some of the basic epidemiological parameters, such as the exponential epidemic growth rate and the basic reproductive number, R(0), across geographic areas are still not well quantified. Here, we developed an…	Estimating the reproductive number R(0) of SARS-CoV-2 in the United States and eight European countries and implications for vaccination	1	disease name: SARS-CoV-2 location: the United States date: during the early epidemic period before broad control measures were implemented R0 value: 5.8 %CI values: (confidence interval: 4.7-7.3) method: mathematical model | disease name: SARS-CoV-2 location: eight European countries date: during the early epidemic period before broad control measures were implemented R0 value: between 3.6 and 6.…	[{"contribution":{"disease name": "SARS-CoV-2", "location": "the United States", "date": "during the early epidemic period before broad control measures were implemented", "R0 value": "5.8", "%CI values": "(confidence interval: 4.7-7.3)", "method": "mathematical model"}},{"contribution":{"disease name": "SARS-CoV-2", "location": "eight European countries", "date": "during the early epidemic perio…	2021-02-13 05:00:00		257
4gz31fr9	4gz31fr9	Background and Methods : England entered its third national lockdown of the COVID-19 pandemic on 6th January 2021 with the aim of reducing the daily number of deaths and pressure on healthcare services. The real-time assessment of community transmission study (REACT-1) obtains throat and nose swabs from randomly selected people in England in order to describe patterns of SARS-CoV-2 prevalence. He…	REACT-1 round 9 interim report: downward trend of SARS-CoV-2 in England inFebruary 2021 but still at high prevalence	1	disease name: SARS-CoV-2 location: England date: 4th and 13th February 2021 R0 value: 0.72 %CI values: - method: -	[{"contribution":{"disease name": "SARS-CoV-2", "location": "England", "date": "4th and 13th February 2021", "R0 value": "0.72", "%CI values": "-", "method": "-"}}]	2021-02-23 05:00:00
91rni8t9	91rni8t9	[Image: see text] The COVID-19 pandemic has affected many in-person laboratory courses across the world. The viral spreading model is complicated but parameters, such as its reproduction number, R(t), can be estimated with the susceptible, infectious, or recovered model. COVID-19 data for many states and countries are widely available online. This provides an opportunity for the students to analy…	Remote Learning of COVID-19 Kinetic Analysis in a Physical Chemistry Laboratory Class	-1	unanswerable	unanswerable	2021-10-18 10:00:00
mwv7lp82	mwv7lp82	In present time, the whole world is in the phase of war against the deadly pandemic COVID'19 and working on different interventions in this regard. Variety of strategies are taken into account from ground level to the state to reduce the transmission rate. For this purpose, the epidemiologists are also augmenting their contribution in structuring such models that could depict a scheme to diminish…	Optimal surveillance mitigation of COVID'19 disease outbreak: Fractional order optimal control of compartment model	-1	unanswerable	unanswerable	2020-12-30 05:00:00
23yszpbr	23yszpbr	Vaccines are the most powerful pharmaceutical tool to combat the COVID-19 pandemic. While the majority (about 65%) of the German population were fully vaccinated, incidence started growing exponentially in October 2021 with about 41% of recorded new cases aged twelve or above being symptomatic breakthrough infections, presumably also contributing to the dynamics. At the time, it (i) remains elusi…	Germany's current COVID-19 crisis is mainly driven by the unvaccinated	-1	unanswerable	unanswerable	2021-11-26 05:00:00
4h4qediw	4h4qediw	BACKGROUND: In the summer of 2021, the Olympic Games were held in Tokyo during the state of emergency due to the spread of COVID-19 pandemic. New daily positive cases (DPC) increased before the Olympic Games, and then decreased a few weeks after the Games. However, several cofactors influencing DPC exist; consequently, careful consideration is needed for future international events during an epid…	Did the Tokyo Olympic Games enhance the transmission of COVID-19? An interpretation with machine learning	-1	unanswerable	unanswerable	2022-04-26 10:00:00
4q1jdlon	4q1jdlon	INTRODUCTION: Given the continuing COVID-19 pandemic and much of the U.S. implementing social distancing owing to the lack of alternatives, there has been a push to develop a vaccine to eliminate the need for social distancing. METHODS: In 2020, the team developed a computational model of the U.S. simulating the spread of COVID-19 coronavirus and vaccination. RESULTS: Simulation experiments revea…	Vaccine Efficacy Needed for a COVID-19 Coronavirus Vaccine to Prevent or Stop an Epidemic as the Sole Intervention	-1	unanswerable	unanswerable	2020
ynae0pms	ynae0pms	BACKGROUND: Novel coronavirus disease 2019 (COVID-19) has had a significant impact on the work force in hospital settings. Despite rigorous screening practices implemented at many institutions, reports have documented transmission from asymptomatic and presymptomatic individuals in community environments. Evidence of nosocomial transmission between healthcare workers and patients in the early pha…	463. Random Sampling of Asymptomatic Hospital Employees: A Period Prevalence Study	1	disease name: COVID-19 location: quaternary pediatric hospital date: April to June 2020 R0 value: 1.4 %CI values: - method: period prevalence study	[{"contribution":{"disease name": "COVID-19", "location": "quaternary pediatric hospital", "date": "April to June 2020", "R0 value": "1.4", "%CI values": "-", "method": "period prevalence study"}}]	2020-12-31
zwlwn47r	zwlwn47r	Several variants of the SARS-CoV-2 virus have been detected during the COVID-19 pandemic. Some of these new variants have been of health public concern due to their higher infectiousness. We propose a theoretical mathematical model based on differential equations to study the effect of introducing a new, more transmissible SARS-CoV-2 variant in a population. The mathematical model is formulated i…	Nonlinear Dynamics of the Introduction of a New SARS-CoV-2 Variant with Different Infectiousness	-1	unanswerable	unanswerable	2021
1xtqdlnj	1xtqdlnj	As a response to a rapidly rising number of SARS-CoV-2 infections, the Belgian government imposed strict social contact restrictions on March 13th, 2020. After nearly two months, the curve was succesfully flattened and social restrictions were gradually released. Unfortunately, pharmaceutical interventions are not yet available so it is expected that preventing COVID-19 outbreaks will depend most…	A deterministic, age-stratified, extended SEIRD model for investigating the effect of non-pharmaceutical interventions on SARS-CoV-2 spread in Belgium	1	disease name: SARS-CoV-2 location: Belgium date: March 13th, 2020 R0 value: 2.83 %CI values: - method: deterministic, continuous-time, age-stratified-SEIRD model with detailed hospital dynamics	[{"contribution":{"disease name": "SARS-CoV-2", "location": "Belgium", "date": "March 13th, 2020", "R0 value": "2.83", "%CI values": "-", "method": "deterministic, continuous-time, age-stratified-SEIRD model with detailed hospital dynamics"}}]	2020-07-17
x4ilp5uf	x4ilp5uf	In December 2019, a newly discovered SARS-CoV-2 virus was emerged from China and propagated worldwide as a pandemic. In the absence of preventive medicine or a ready to use vaccine, mathematical models can provide useful scientific insights about transmission patterns and targets for drug development. In this study, we propose a within-host mathematical model of SARS-CoV-2 infection considering i…	Within host dynamics of SARS-CoV-2 in humans: Modeling immune responses and antiviral treatments	0	disease name: SARS-CoV-2 location: - date: - R0 value: - %CI values: - method: within-host mathematical model	[{"contribution":{"disease name": "SARS-CoV-2", "location": "-", "date": "-", "R0 value": "-", "%CI values": "-", "method": "within-host mathematical model"}}]	2020
2ufwx5jp	2ufwx5jp	After slowing down the spread of the novel coronavirus COVID-19, many countries have started to relax their severe confinement measures in the face of critical damage to socioeconomic structures. At this point, it is desirable to monitor the degree to which political measures or social affairs have exerted influence on the spread of disease; however, tracing back individual transmission of infect…	Estimating the time-varying reproduction number of COVID-19 with a state-space method	-1	unanswerable	unanswerable	2020-07-11 10:00:00	keep	362
vn2qajdl	vn2qajdl	Background: We aimed to determine the generation time, the best model for estimating reproduction number (R), and to estimate the basic reproduction number (R0) and effective reproduction number (Rt) for COVID-19 in Iran. Methods: We used the daily incidence cases of COVID-19, hospitalized due to a probable diagnosis of COVID-19 from 19 February 2020 to 17 November 2020 in Iran. Four models, incl…	The Dynamic Effective Reproductive Number of COVID-19 during the Epidemic in Iran	1	disease name: COVID-19 location: Iran date: first week of the epidemic, leading up to 21 February 2020 R0 value: 7.19 %CI values: 95% CI: 5.56, 9.00 method: time-dependent (TD) model	[{"contribution":{"disease name": "COVID-19", "location": "Iran", "date": "first week of the epidemic, leading up to 21 February 2020", "R0 value": "7.19", "%CI values": "95% CI: 5.56, 9.00", "method": "time-dependent (TD) model"}}]	2022
ew7re39b	ew7re39b	England has been heavily affected by the SARS-CoV-2 pandemic, with severe 'lockdown' mitigation measures now gradually being lifted. The real-time pandemic monitoring presented here has contributed to the evidence informing this pandemic management throughout the first wave. Estimates on the 10 May showed lockdown had reduced transmission by 75%, the reproduction number falling from 2.6 to 0.61. …	Real-time nowcasting and forecasting of COVID-19 dynamics in England: the first wave	1	disease name: COVID-19 location: England date: 10 May (before lockdown) R0 value: 2.6 %CI values: - method: - | disease name: COVID-19 location: England date: 19 June (after lockdown) R0 value: 0.61 %CI values: - method: -	[{"contribution":{"disease name": "COVID-19", "location": "England", "date": "10 May (before lockdown)", "R0 value": "2.6", "%CI values": "-", "method": "-"}},{"contribution":{"disease name": "COVID-19", "location": "England", "date": "19 June (after lockdown)", "R0 value": "0.61", "%CI values": "-", "method": "-"}}]	2021		560
g03jicel	g03jicel	BACKGROUND: A second wave of COVID-19 cases in autumn, 2020, in England led to localised, tiered restrictions (so-called alert levels) and, subsequently, a second national lockdown. We examined the impact of these tiered restrictions, and alternatives for lockdown stringency, timing, and duration, on severe acute respiratory syndrome coronavirus 2 (SARS-CoV-2) transmission and hospital admissions…	Association of tiered restrictions and a second lockdown with COVID-19 deaths and hospital admissions in England: a modelling study	-1	unanswerable	unanswerable	2020-12-24 05:00:00
n59q479q	n59q479q	Corona Virus Disease 2019 (COVID-19) started in Wuhan province of China in November 2019 and within a short time, it was declared as a worldwide pandemic by World Health Organisation due to very fast worldwide spread of the virus. In the absence of any vaccine, various mitigation measures were used. In the past, the effect of temperature and humidity on the spread of the virus was studied for a v…	Study of the Dependence of Effective Reproduction Number of COVID-19 on the Temperature and Humidity: A Case Study with the Indian States	-1	unanswerable	unanswerable	2020-07-06 10:00:00
54cuem0b	54cuem0b	We study the effect of the coronavirus disease 2019 (COVID-19) in India using the SEIR compartmental model. After it's outbreak in Wuhan, China, it has been imported to India which is a densely populated country. India is fighting against this disease by ensuring nationwide social distancing. We estimate the infection rate to be 0.258 using a least square method with Poisson noise and estimate th…	Prediction of the Peak, Effect of Intervention and Total Infected by the Coronavirus Disease in India	1	disease name: Coronavirus Disease 2019 (COVID-19) location: India date: - R0 value: 2.58 %CI values: - method: least square method with Poisson noise	[{"contribution":{"disease name": "Coronavirus Disease 2019 (COVID-19)", "location": "India", "date": "-", "R0 value": "2.58", "%CI values": "-", "method": "least square method with Poisson noise"}}]	2020-04-24
s634zdc5	s634zdc5	Severe acute respiratory syndrome (SARS) is a recently described illness of humans that has spread widely over the past 6 months. With the use of detailed epidemiologic data from Singapore and epidemic curves from other settings, we estimated the reproductive number for SARS in the absence of interventions and in the presence of control efforts. We estimate that a single infectious case of SARS w…	Transmission dynamics and control of severe acute respiratory syndrome.	1	disease name: Severe acute respiratory syndrome (SARS) location: Singapore date: - R0 value: - %CI values: - method: use of detailed epidemiologic data from Singapore and epidemic curves from other settings	[{"contribution":{"disease name": "Severe acute respiratory syndrome (SARS)", "location": "Singapore", "date": "-", "R0 value": "-", "%CI values": "-", "method": "use of detailed epidemiologic data from Singapore and epidemic curves from other settings"}}]	2003
4ppe6zgu	4ppe6zgu	When encountering the outbreak and early spreading of COVID-19, the Government of Japan imposed gradually upgraded restriction policies and declared the state of emergency in April 2020 for the first time. To evaluate the efficacy of the countering strategies in different periods, we constructed a SEIADR (susceptible-exposed-infected-asymptomatic-documented-recovered) model to simulate the cases …	The Impact of the Declaration of the State of Emergency on the Spread of COVID-19: A Modeling Analysis	-1	unanswerable	unanswerable	2021-07-26 10:00:00
7h1wg0oa	7h1wg0oa	Introduction: Since December 29, 2019 a pandemic of new novel coronavirus-infected pneumonia named COVID-19 has started from Wuhan, China, has led to 254 996 confirmed cases until midday March 20, 2020. Sporadic cases have been imported worldwide, in Algeria, the first case reported on February 25, 2020 was imported from Italy, and then the epidemic has spread to other parts of the country very q…	COVID-19 outbreak in Algeria: A mathematical Model to predict cumulative cases	1	disease name: new novel coronavirus-infected pneumonia named COVID-19 location: Algeria date: - R0 value: 2.55 %CI values: - method: Alg-COVID-19 Model	[{"contribution":{"disease name": "new novel coronavirus-infected pneumonia named COVID-19", "location": "Algeria", "date": "-", "R0 value": "2.55", "%CI values": "-", "method": "Alg-COVID-19 Model"}}]	2020-03-23
isrjp99w	isrjp99w	The new coronavirus that was first identified in December 2019 in Wuhan China, now called SARS-CoV-2, which causes the disease called COVID-19, has spread from China to the entire world in a few months. Due to its contagious potential (R0: 5.7) and because there is still no effective treatment to stop the infection, and a vaccine for prevention it is not yet available to the general population, C…	SARS-CoV-2 in Mexico: Beyond Detection Methods, Scope and Limitations	-1	unanswerable	unanswerable	2021-01-14 05:00:00
g77d8vy8	g77d8vy8	INTRODUCTION: the level five (L5) lockdown was a very stringent social distancing measure taken to reduce the spread of COVID-19 infections. This study assessed the impact of the L5 lockdown and its association with the incidence of COVID-19 cases in South Africa (SA). METHODS: data was obtained from the National Department of Health (NDoH) from the 5(th) March to the 30(th) April 2020. A basic r…	Impact of level five lockdown on the incidence of COVID-19: lessons learned from South Africa	-1	unanswerable	unanswerable	2021-06-23 10:00:00
qh96bfi6	qh96bfi6	One of the primary strategies of slowing down the COVID-19 pandemic has been the establishment of social distancing rules that recommend keeping a buffer distance between individuals, and this has proven effective in helping in reducing the basic reproduction number [R 0] . However, social distancing rules have put the use of public spaces in densely populated places under strain, and this is esp…	Lack of sufficient public space can limit the effectiveness of COVID-19's social distancing measures	-1	unanswerable	unanswerable	2020-06-12 10:00:00
7unh303n	7unh303n	Accurately estimating relative transmission rates of SARS-CoV-2 Variant of Concern and Variant of Interest viruses remains a scientific and public health priority. Recent studies have used the sample proportions of different variants from sequence data to describe variant frequency dynamics and relative transmission rates, but frequencies alone cannot capture the rich epidemiological behavior of …	SARS-CoV-2 variant dynamics across US states show consistent differences in effective reproduction numbers	-1	unanswerable	unanswerable	2021-12-11		422
se6ghkg3	se6ghkg3	An epidemiological model for COVID-19 was developed and implemented in MATLAB/GNU Octave for use by public health practitioners, policy makers and the general public. The model distinguishes four stages in the disease: infected, sick, seriously sick, and better. The model was preliminarily parameterized based on observations of the spread of the disease. The model is consistent with a mortality r…	A COVID-19 Epidemiological Model for Community and Policy Maker Use	1	disease name: COVID-19 location: worldwide outside of China date: late February - early March 2020 R0 value: 2.82 %CI values: - method: epidemiological model for COVID-19 was developed and implemented in MATLAB/GNU Octave | disease name: COVID-19 location: Western world date: late February - early March 2020 R0 value: 3.83 %CI values: - method: epidemiological model for COVID-19 was developed and…	[{"contribution":{"disease name": "COVID-19", "location": "worldwide outside of China", "date": "late February - early March 2020", "R0 value": "2.82", "%CI values": "-", "method": "epidemiological model for COVID-19 was developed and implemented in MATLAB/GNU Octave"}},{"contribution":{"disease name": "COVID-19", "location": "Western world", "date": "late February - early March 2020", "R0 value"…	2020		1357
2ua7dzjk	2ua7dzjk	Although dengue and Zika cocirculation has increased within the past 5 years, very little is known about its epidemiological consequences. To investigate the effect of dengue and Zika cocirculation on the spread of both pathogens, we create a deterministic dengue and Zika coinfection model, the first to incorporate altered infectivity of mosquitoes (due to coinfection). The model also addresses i…	Coinfection, Altered Vector Infectivity, and Antibody-Dependent Enhancement: The DengueÃ¢â‚¬â€œZika Interplay	-1	unanswerable	unanswerable	2020-01-14
edy26pkk	edy26pkk	The outbreak of COVID-19 was first experienced in Wuhan City, China, during December 2019 before it rapidly spread over globally. This paper has proposed a mathematical model for studying its transmission dynamics in the presence of face mask wearing and hospitalization services of human population in Tanzania. Disease-free and endemic equilibria were determined and subsequently their local and g…	Mathematical modelling on COVID-19 transmission impacts with preventive measures: a case study of Tanzania	1	disease name: COVID-19 location: Tanzania date: December 2019 R0 value: in the presence of face masks wearing and medication services or hospitalization as preventive measure for its transmission, R 0 = 0.698 while in their absence R 0 = 3.8 %CI values: - method: Lyapunov function technique	[{"contribution":{"disease name": "COVID-19", "location": "Tanzania", "date": "December 2019", "R0 value": "in the presence of face masks wearing and medication services or hospitalization as preventive measure for its transmission, R 0 = 0.698 while in their absence R 0 = 3.8", "%CI values": "-", "method": "Lyapunov function technique"}}]	2020
hu6iwoab	hu6iwoab	Background: An epidemic model based only on respiratory droplets and close contact could not fully explain the regional differences in the spread of the recent severe acute respiratory syndrome COVID-19 in Italy, which was fast and dramatic only in Lombardy and Po Valley. On March 16th 2020, we presented a Position Paper proposing a research hypothesis concerning the association between higher mo…	The Potential role of Particulate Matter in the Spreading of COVID-19 in Northern Italy: First Evidence-based Research Hypotheses	-1	unanswerable	unanswerable	2020-04-17 10:00:00
cdb1nvdr	cdb1nvdr	In SÃƒÂ£o Paulo, Brazil, the first case of coronavirus disease 2019 (CoViD-19) was confirmed on 26 February, the first death due to CoViD-19 was registered on 16 March, and on 24 March, SÃƒÂ£o Paulo implemented the isolation of persons in non-essential activities. A mathematical model was formulated based on non-linear ordinary differential equations considering young (60 years old or less) and e…	Mathematical model describing CoViD-19 in SÃƒÂ£o Paulo, Brazil Ã¢â‚¬â€œ evaluating isolation as control mechanism and forecasting epidemiological scenarios of release	1	disease name: coronavirus disease 2019 (CoViD-19) location: Sao Paulo, Brazil date: - R0 value: 6.8 %CI values: - method: non-linear ordinary differential equations	[{"contribution":{"disease name": "coronavirus disease 2019 (CoViD-19)", "location": "Sao Paulo, Brazil", "date": "-", "R0 value": "6.8", "%CI values": "-", "method": "non-linear ordinary differential equations"}}]	2020-07-20
ixrdxh6a	ixrdxh6a	COVID-19 pandemic has been raging all around the world for almost a year now, as of November 1, 2020. In this paper, we try to analyze the variation of the COVID-19 pandemic in different countries in the light of some modifications to the susceptible-infected-recovered (SIR) model. The SIR model was modified by taking time-dependent rate parameters. From this modified SIR model, the basic reprodu…	Universality and herd immunity threshold: Revisiting the SIR model for COVID-19	0	disease name: COVID-19 location: India date: - R0 value: - %CI values: - method: SIR model	[{"contribution":{"disease name": "COVID-19", "location": "India", "date": "-", "R0 value": "-", "%CI values": "-", "method": "SIR model"}}]	2021
jrqdbb5q	jrqdbb5q	The Coronavirus Disease 2019 (COVID)-19 pandemic has placed unprecedented pressures on societies around the world. Successful vaccines, developed against the spike protein of the Severe Acute Respiratory Syndrome Virus 2 (SARS-CoV-2) virus, offer hope that new hospitalisations and new deaths will subside. However, vaccination takes place in a dynamic environment. For example, new variants of the …	Theoretically quantifying the direct and indirect benefits of vaccination against SARS-CoV-2 in terms of avoided deaths	-1	unanswerable	unanswerable	2022-05-25 10:00:00
dvyew37f	dvyew37f	This study aims to understand the features of the COVID-19 spread in the South Region of Brazil by estimating the Effective Reproduction Number (ERN) for the states of Parana (PR), Rio Grande do Sul (RS), and Santa Catarina (SC). We used the SIRD (Susceptibles-Infectious-Recovered-Dead) model to describe the past data and to simulate strategies for the gradual mitigation of the epidemic curve by …	Modeling the COVID-19 dissemination in the South Region of Brazil and testing gradual mitigation strategies	-1	unanswerable	unanswerable	2020-07-04 10:00:00
ge871ypq	ge871ypq	Recent studies suggest that, for disease transmission models with latent and infectious periods, the use of gamma distribution assumption seems to provide a better fit for the associated epidemiological data in comparison to the use of exponential distribution assumption. The objective of this study is to carry out a rigorous mathematical analysis of a communicable disease transmission model with…	Qualitative study of a quarantine/isolation model with multiple disease stages	-1	unanswerable	unanswerable	2011-11-01 05:00:00
yeygx7lj	yeygx7lj	The COVID-19 outbreak has highlighted our vulnerability to novel infections. Faced with this threat and no effective treatment, in line with many other countries, the UK adopted enforced social distancing (lockdown) to reduce transmission-successfully reducing the reproductive number R below one. However, given the large pool of susceptible individuals that remain, complete relaxation of controls…	Modelling optimal vaccination strategy for SARS-CoV-2 in the UK	-1	unanswerable	unanswerable	2021
yxvhurow	yxvhurow	Objective: To evaluate effectiveness of prevention and control strategies for COVID-19 in Ningbo by using an epidemic dynamic model. Methods: The incidence data and epidemic information of COVID-19 reported in Ningbo as of 9 March, 2020 were collected, and based on the implementation of prevention and control strategies, we developed a SEIR epidemic dynamics model. The basic and real-time reprodu…	[Epidemic dynamic model based evaluation of effectiveness of prevention and control strategies for COVID-19 in Ningbo].	1	disease name: COVID-19 location: Ningbo date: 9 March, 2020 R0 value: 4.8 %CI values: - method: SEIR epidemic dynamics model	[{"contribution":{"disease name": "COVID-19", "location": "Ningbo", "date": "9 March, 2020", "R0 value": "4.8", "%CI values": "-", "method": "SEIR epidemic dynamics model"}}]	2020-10-10
rbnzz1cd	rbnzz1cd	PURPOSE: To estimate the basic reproduction ratio () of SARS-CoV-2 inside a correctional facility early in the COVID-19 pandemic. METHODS: We developed a dynamic transmission model for a large, urban jail in the United States. We used the next generation method to determine the basic reproduction ratio We included anonymized data of incarcerated individuals and correctional staff with confirmed C…	Estimation of COVID-19 basic reproduction ratio in a large urban jail in the United States	1	disease name: COVID-19 location: large urban jail in the United States date: - R0 value: 8.44 %CI values: 95% Credible Interval (CrI): 5.00-13.13 method: dynamic transmission model	[{"contribution":{"disease name": "COVID-19", "location": "large urban jail in the United States", "date": "-", "R0 value": "8.44", "%CI values": "95% Credible Interval (CrI): 5.00-13.13", "method": "dynamic transmission model"}}]	2020
zi3thqe6	zi3thqe6	The contributions of asymptomatic infections to herd immunity and community transmission are key to the resurgence and control of COVID-19, but are difficult to estimate using current models that ignore changes in testing capacity. Using a model that incorporates daily testing information fit to the case and serology data from New York City, we show that the proportion of symptomatic cases is low…	Quantifying asymptomatic infection and transmission of COVID-19 in New York City using observed cases, serology, and testing capacity	1	disease name: COVID-19 location: New York City date: - R0 value: from 3.2 to 4.4 %CI values: - method: model that incorporates daily testing information fit to the case and serology data	[{"contribution":{"disease name": "COVID-19", "location": "New York City", "date": "-", "R0 value": "from 3.2 to 4.4", "%CI values": "-", "method": "model that incorporates daily testing information fit to the case and serology data"}}]	2021
y8nfhnax	y8nfhnax	BACKGROUND: Human coronaviruses (HCoVs), rhinoviruses, and non-polio enteroviruses (NPEVs) are leading causes of seasonal acute respiratory infections among children and adults, posing significant health and economic burden annually. Despite this, little is known about their epidemiological dynamics, including the role of asymptomatic shedding in transmission; the durations of virus incubation an…	Transmission Dynamics of Respiratory Viruses in a Congregated Military Population: Prospective Cohort Study	1	disease name: HCoV-OC43 location: Military recruits date: 65 days during winter 2017 R0 value: 1.97 %CI values: (95% credible interval: 1.49, 2.60) method: Bayesian methods | disease name: HCoV-229E location: Military recruits date: 65 days during winter 2017 R0 value: 5.69 %CI values: (3.92, 7.98) method: Bayesian methods | disease name: Human coronaviruses (HCoVs), rhinoviruses, and non-polio e…	[{"contribution":{"disease name": "HCoV-OC43", "location": "Military recruits", "date": "65 days during winter 2017", "R0 value": "1.97", "%CI values": "(95% credible interval: 1.49, 2.60)", "method": "Bayesian methods"}},{"contribution":{"disease name": "HCoV-229E", "location": "Military recruits", "date": "65 days during winter 2017", "R0 value": "5.69", "%CI values": "(3.92, 7.98)", "method": …	2017-10-04 10:00:00		1213
wve91emq	wve91emq	Background: Mathematical modeling constitutes an important tool for planning robust responses to epidemics. This study was conducted to guide the Qatari national response to the severe acute respiratory syndrome coronavirus 2 (SARS-CoV-2) epidemic. The study investigated the epidemic's time-course, forecasted health care needs, predicted the impact of social and physical distancing restrictions, …	Mathematical modeling of the SARS-CoV-2 epidemic in Qatar and its impact on the national response to COVID-19	1	disease name: SARS-CoV-2 location: Qatar date: By October 15, 2020 R0 value: 1.07-2.78 %CI values: - method: age-structured deterministic model	[{"contribution":{"disease name": "SARS-CoV-2", "location": "Qatar", "date": "By October 15, 2020", "R0 value": "1.07-2.78", "%CI values": "-", "method": "age-structured deterministic model"}}]	2021
cdrj005f	cdrj005f	Background: The first confirmed cases of COVID-19 in Iran were reported on February 19, 2020. The coronavirus expanded rapidly in all Iranian provinces and three waves of COVID-19 cases have been observed since the pandemic took effect and the fourth wave of Covid-19 cases will likely be observed soon. This study aimed to model the spread of COVID-19 in Iran and to estimate the epidemic parameter…	Modeling COVID-19 in Iran using Particle Swarm Optimization algorithm	-1	unanswerable	unanswerable	2021-04-15 10:00:00
5x1xwyov	3zgx2kxk	SARS-CoV-2 rapidly spread from a regional outbreak to a global pandemic in just a few months. Global research efforts have focused on developing effective vaccines against SARS-CoV-2 and the disease it causes, COVID-19. However, some of the basic epidemiological parameters, such as the exponential epidemic growth rate and the basic reproductive number, R0, across geographic areas are still not we…	Estimating the reproductive number R0 of SARS-CoV-2 in the United States and eight European countries and implications for vaccination	1	disease name: SARS-CoV-2 location: the United States date: during the early epidemic period before broad control measures were implemented R0 value: 5.8 %CI values: (confidence interval: 4.7-7.3) method: mathematical model | disease name: SARS-CoV-2 location: eight European countries date: during the early epidemic period before broad control measures were implemented R0 value: between 3.6 and 6.…	[{"contribution":{"disease name": "SARS-CoV-2", "location": "the United States", "date": "during the early epidemic period before broad control measures were implemented", "R0 value": "5.8", "%CI values": "(confidence interval: 4.7-7.3)", "method": "mathematical model"}},{"contribution":{"disease name": "SARS-CoV-2", "location": "eight European countries", "date": "during the early epidemic perio…	2020-08-04 10:00:00	change_main_cord_id	257
qbf90bso	2gh124uk	This study is to investigate the impacts of the strategies against COVID-19 epidemic in China, so as to provide a solid reference to control its spread in the world. A two-stage dynamics transmission model is proposed using 'lockdown of Wuhan city' as the time line. The first stage is a SEIR derived model that considers the contagious of the exposed ones. It simulates the COVID-19 epidemic in Hub…	Modeling the COVID-19 Epidemic in PR China	1	disease name: COVID-19 location: Hubei Province date: before April 30, 2020 R0 value: 3.2035 %CI values: - method: SEIR derived model	[{"contribution":{"disease name": "COVID-19", "location": "Hubei Province", "date": "before April 30, 2020", "R0 value": "3.2035", "%CI values": "-", "method": "SEIR derived model"}}]	2021	change_main_cord_id	1263
paqq56in	paqq56in	BACKGROUND: The estimates of several key epidemiological parameters of the COVID-19 pandemic are often based on small sample sizes or are inaccurate for various reasons. OBJECTIVE: The aim of this study is to obtain more robust estimates of the incubation period, serial interval, frequency of presymptomatic transmission, and basic reproduction number (R0) of COVID-19 based on a large case series.…	Epidemiological Parameters of COVID-19: Case Series Study	1	disease name: COVID-19 location: China, Japan, and Singapore date: - R0 value: 1.85 %CI values: (95% CI 1.37-2.60) method: Widely used models such as gamma distributions	[{"contribution":{"disease name": "COVID-19", "location": "China, Japan, and Singapore", "date": "-", "R0 value": "1.85", "%CI values": "(95% CI 1.37-2.60)", "method": "Widely used models such as gamma distributions"}}]	2020
gtk9044r	gtk9044r	The coronavirus disease 2019 (COVID-19) has grown up to be a pandemic within a short span of time. To investigate transmission dynamics and then determine control methodology, we took epidemic in Wuhan as a study case. Unfortunately, to our best knowledge, the existing models are based on the common assumption that the total population follows a homogeneous spatial distribution, which is not the …	Transmission dynamics and control methodology of COVID-19: A modeling study	1	disease name: coronavirus disease 2019 (COVID-19) location: Wuhan date: - R0 value: 7.9 %CI values: - method: novel epidemic model called SEIR-HC	[{"contribution":{"disease name": "coronavirus disease 2019 (COVID-19)", "location": "Wuhan", "date": "-", "R0 value": "7.9", "%CI values": "-", "method": "novel epidemic model called SEIR-HC"}}]	2020
clt0sgbz	clt0sgbz	Background: The effective reproduction number, Rt, is a tool to track and understand epidemic dynamics. This investigation of Rt estimations was conducted to guide the national COVID-19 response in Qatar, from the onset of the epidemic until August 18, 2021. Methods: Real-time empirical RtEmpirical was estimated using five methods, including the Robert Koch Institute, Cislaghi, Systrom-Bettencour…	Characterizing the effective reproduction number during the COVID-19 epidemic: Insights from Qatar experience	-1	unanswerable	unanswerable	2021-10-07 10:00:00
n28o6qwt	n28o6qwt	This work presents a simple and realistic approach to handle the available data of COVID-19 patients in India and to forecast the scenario. The model proposed is based on the available facts like the onset of lockdown (as announced by the Government on 25th day, {\tau}0 and the recovery pattern dictated by a mean life recovery time of {\tau}1 ( normally said to be around 14 days). The data of inf…	COVID 19, a realistic model for saturation, growth and decay of the India specific disease	1	disease name: COVID-19 location: India date: March 2, 2020 to April 16, 2020 R0 value: close to 1/6 %CI values: - method: -	[{"contribution":{"disease name": "COVID-19", "location": "India", "date": "March 2, 2020 to April 16, 2020", "R0 value": "close to 1/6", "%CI values": "-", "method": "-"}}]	2020-04-21
htvxfms0	htvxfms0	Background and objectivesSARS-CoV-2 has wrecked the world for the past 17 months. India has been hit by the second wave of the virus which has been characterized by new symptoms. This study focuses on the pattern of infection over the last 13 months utilizing epidemic model to predict course of the pandemic. Material and methodsThe data was collected from covid19india.org to perform analysis base…	Epidemiology study of SARS-CoV-2 pandemic in India, the first and second wave	-1	unanswerable	unanswerable	2021
u58zch5z	u58zch5z	Addressed in this work is the performance of five popular algorithms, which aim at assessing the dissemination dynamics of the COVID-19 disease on the basis of the time series of new confirmed cases. The tests are based on simulated data, generated by means of a deterministic compartmental epidemiological model \cite{Matsinos2020a}, adapted herein to also include the possibility of the loss of im…	COVID-19: The extraction of the effective reproduction number from the time series of new cases	-1	unanswerable	unanswerable	2021-05-07 10:00:00
eisjfix3	eisjfix3	BACKGROUND: An increasing number of patients come to the operating room in use of opioid analgesics. They have different levels of tolerance to opioid effects which challenge the anesthesiologists in search of safe and effective opioid dosing perioperatively. The tested hypothesis is that simple measures introduced will allow us to measure tolerance qualitatively. Opioid effects on pain (analgesi…	Qualitative measurement of opioid effects on pain and dyspnea: gender difference in the sensitivity	-1	unanswerable	unanswerable	2020
1v9qubxp	1v9qubxp	OBJECTIVES: To compare a mathematical tool and time-dependent reproduction number (R(t)) estimates to assess the COVID-19 pandemic progression in a Canadian context. METHODS: Total number of reported cases were plotted against total number of tests for COVID-19 performed over time, with and without smoothing, for Canada and some Canadian provinces individually. Changes in curvature profile were i…	Assessing the progression of the COVID-19 pandemic in Canada using testing data and time-dependent reproduction numbers	-1	unanswerable	unanswerable	2020-10-22 10:00:00
9e6a5bgy	9e6a5bgy	The COVID-19 outbreak caused by SARS-CoV-2 began in December 2019 and was basically under control in April 2020 in Wuhan. To explore the impact of intervention measures on the COVID-19 epidemic, we established SEIR models to predict the epidemic characteristics of COVID-19 at four different phases (beginning, outbreak, recession, and plateau) from January 1st, 2020, to March 30th, 2020. We found …	Retrospective prediction of the epidemic trend of COVID-19 in Wuhan at four phases.	1	disease name: COVID-19 location: Wuhan date: January 1st, 2020 to March 30th, 2020 (phase I) R0 value: 10.7843 %CI values: - method: SEIR models to predict the epidemic characteristics of COVID-19 at four different phases (beginning, outbreak, recession, and plateau) | disease name: COVID-19 location: Wuhan date: January 1st, 2020 to March 30th, 2020 (phase II) R0 value: 13.8144 %CI values: - met…	[{"contribution":{"disease name": "COVID-19", "location": "Wuhan", "date": "January 1st, 2020 to March 30th, 2020 (phase I)", "R0 value": "10.7843", "%CI values": "-", "method": "SEIR models to predict the epidemic characteristics of COVID-19 at four different phases (beginning, outbreak, recession, and plateau)"}},{"contribution":{"disease name": "COVID-19", "location": "Wuhan", "date": "January…	2021-01-07		1522
dlgvge3s	qbr3aomm	France has been heavily affected by the SARS-CoV-2 epidemic and went into lockdown on the 17th March 2020. Using models applied to hospital and death data, we estimate the impact of the lockdown and current population immunity. We find 2.6% of infected individuals are hospitalized and 0.53% die, ranging from 0.001% in those <20y to 8.3% in those >80y. Across all ages, men are more likely to be ho…	Estimating the burden of SARS-CoV-2 in France	1	disease name: SARS-CoV-2 location: France date: 17th March 2020 R0 value: 3.3 to 0.5 %CI values: - method: Models applied to hospital and death data	[{"contribution":{"disease name": "SARS-CoV-2", "location": "France", "date": "17th March 2020", "R0 value": "3.3 to 0.5", "%CI values": "-", "method": "Models applied to hospital and death data"}}]	2020-04-24	change_main_cord_id	216
mc7sk1gs	mc7sk1gs	The outbreak of a novel coronavirus (COVID-19) generated an outbreak of public opinions in the Chinese Sina-microblog. To help in designing effective communication strategies during a major public health emergency, we propose a multiple-information susceptible-discussing-immune (M-SDI) model in order to understand the patterns of key information propagation on social networks. We develop the M-SD…	COVID-19 information propagation dynamics in the Chinese Sina-microblog.	1	disease name: novel coronavirus (COVID-19) location: Chinese Sina date: - R0 value: fallen from 1.7769 and maintained around 0.97 %CI values: - method: multiple-information susceptible-discussing-immune (M-SDI) model	[{"contribution":{"disease name": "novel coronavirus (COVID-19)", "location": "Chinese Sina", "date": "-", "R0 value": "fallen from 1.7769 and maintained around 0.97", "%CI values": "-", "method": "multiple-information susceptible-discussing-immune (M-SDI) model"}}]	2020-03-09
4fnmpryv	4fnmpryv	Epidemiological Modeling supports the evaluation of various disease management activities. The value of epidemiological models lies in their ability to study various scenarios and to provide governments with a priori knowledge of the consequence of disease incursions and the impact of preventive strategies. A prevalent method of modeling the spread of pandemics is to categorize individuals in the…	Using Unstated Cases to Correct for COVID-19 Pandemic Outbreak and Its Impact on Easing the Intervention for Qatar	-1	unanswerable	unanswerable	2021
jcbljdd0	jcbljdd0	Grapevine leafroll-associated virus 3 (GLRaV-3) is one of the causal agents of grapevine leafroll disease (GLD), which severely impacts grapevine production in most viticultural regions of the world. The development of virus-resistant plants is a desirable strategy for the efficient control of viral diseases. However, natural resistant resources have not been reported in the genus Vitis, and anti…	Engineering CRISPR immune systems conferring GLRaV-3 resistance in grapevine	-1	unanswerable	unanswerable	2022-01-28
zakwiu6t	zakwiu6t	This paper stresses its base contribution on a new SIR-type model including direct and fomite transmission as well as the effect of distinct household structures. The model derivation is modulated by several mechanistic processes inherent from typical airborne diseases. The notion of minimum contact radius is included in the direct transmission, facilitating the arguments on physical distancing. …	An epidemic model integrating direct and fomite transmission as well as household structure applied to COVID-19	0	disease name: COVID-19 location: - date: - R0 value: - %CI values: - method: -	[{"contribution":{"disease name": "COVID-19", "location": "-", "date": "-", "R0 value": "-", "%CI values": "-", "method": "-"}}]	2021-01-05 05:00:00
8ooub9fa	8ooub9fa	BACKGROUND: School closure is a common mitigation strategy during severe influenza epidemics and pandemics. However, the effectiveness of this strategy remains controversial. In this study, we aimed to explore the effectiveness of school closure on seasonal influenza epidemics in provincial-level administrative divisions (PLADs) with varying urbanization rates in China. METHODS: This study analyz…	Increased urbanization reduced the effectiveness of school closures on seasonal influenza epidemics in China	-1	unanswerable	unanswerable	2021-10-21 10:00:00
ntx35a8s	ntx35a8s	BACKGROUND: In mid-June 2009 the State of Victoria in Australia appeared to have the highest notification rate of pandemic (H1N1) 2009 influenza in the world. We hypothesise that this was because community transmission of pandemic influenza was already well established in Victoria at the time testing for the novel virus commenced. In contrast, this was not true for the pandemic in other parts of …	Pandemic (H1N1) 2009 Influenza Community Transmission Was Established in One Australian State When the Virus Was First Identified in North America	-1	unanswerable	unanswerable	2010-06-28
87mjdccj	87mjdccj	BACKGROUND: The anticipated extent of antiviral use during an influenza pandemic can have adverse consequences for the development of drug resistance and rationing of limited stockpiles. The strategic use of drugs is therefore a major public health concern in planning for effective pandemic responses. METHODS: We employed a mathematical model that includes both sensitive and resistant strains of …	Antiviral resistance during pandemic influenza: implications for stockpiling and drug use	-1	unanswerable	unanswerable	2009-01-22
nmmimc71	nmmimc71	BACKGROUND: Fast changes in human demographics worldwide, coupled with increased mobility, and modified land uses make the threat of emerging infectious diseases increasingly important. Currently there is worldwide alert for H5N1 avian influenza becoming as transmissible in humans as seasonal influenza, and potentially causing a pandemic of unprecedented proportions. Here we show how epidemiologi…	Real Time Bayesian Estimation of the Epidemic Potential of Emerging Infectious Diseases	-1	unanswerable	unanswerable	2008-05-14
73954x6m	73954x6m	This work presents a mobility indicator derived from fully anonymised and aggregated mobile positioning data. Even though the indicator does not provide information about the behaviour of individuals, it captures valuable insights into the mobility patterns of the population in the EU and it is expected to inform responses against the COVID-19 pandemic. Spatio-temporal harmonisation is carried ou…	Measuring the impact of COVID-19 confinement measures on human mobility using mobile positioning data. A European regional analysis	-1	unanswerable	unanswerable	2020
xvwpqhvf	xvwpqhvf	In this paper we analyze general deterministic epidemiological models described by autonomous ordinary differential equations taking into account heterogeneity related to the infectivity and vital dynamics, in which the flow into the compartment of the susceptible individuals is given by a generic function. Our goal is to provide a new tool that facilitates the qualitative analysis of equilibrium…	Stability analysis of epidemiological models incorporating heterogeneous infectivity	-1	unanswerable	unanswerable	2020-08-14
iwp45xnf	iwp45xnf	An insufficient supply of effective SARS-CoV-2 vaccine in most countries demands an effective vaccination strategy to minimize the damage caused by the disease. Currently, many countries vaccinate their population in descending order of age to minimize the deaths caused by the disease;however, the effectiveness of this strategy needs to be quantitatively assessed. We employed the susceptible-infe…	Efficient vaccination strategies to reduce the epidemic mortality in population with heterogeneous fatality rate	-1	unanswerable	unanswerable	2021		122
6tnkz6hh	6tnkz6hh	Coronavirus disease (COVID-19) broke out in Wuhan, Hubei province,China, in December 2019 and soon after Chinese health authorities tookunprecedented prevention and control measures to curb the spreading ofthe novel coronavirus-related pneumonia. We develop a mathematicalmodel based on daily updates of reported cases to study the evolutionof the epidemic. With the model, on 95% confidence level, …	A deterministic epidemic model for the emergence of COVID-19 in China	1	disease name: COVID-19 location: China date: - R0 value: 2.82 %CI values: ± 0.11 method: mathematicalmodel based on daily updates of reported cases	[{"contribution":{"disease name": "COVID-19", "location": "China", "date": "-", "R0 value": "2.82", "%CI values": "± 0.11", "method": "mathematicalmodel based on daily updates of reported cases"}}]	2020-03-10 05:00:00
73oe5as9	73oe5as9	Despite various levels of preventive measures, in 2020 many countries have suffered severely from the coronavirus 2019 (COVID-19) pandemic caused by the severe acute respiratory syndrome coronavirus 2 (SARS-CoV-2) virus. We show that population heterogeneity can significantly impact disease-induced immunity as the proportion infected in groups with the highest contact rates is greater than in gro…	A mathematical model reveals the influence of population heterogeneity on herd immunity to SARS-CoV-2	-1	unanswerable	unanswerable	2020-06-23 10:00:00
kkooawv0	kkooawv0	BACKGROUND: The prevalence and severity of the 2009 H1N1 pandemic appeared to vary significantly across populations and geographic regions. We sought to investigate the variability in transmissibility of H1N1 pandemic in different health regions (including urban centres and remote, isolated communities) in the province of Manitoba, Canada. METHODS: The Richards model was used to fit to the daily …	Variability in transmissibility of the 2009 H1N1 pandemic in Canadian communities	1	disease name: 2009 H1N1 location: Manitoba, Canada date: spring and fall waves of the H1N1 pandemic R0 value: 1.55 to 2.24 %CI values: 1.45 to 2.88 method: Richards model	[{"contribution":{"disease name": "2009 H1N1", "location": "Manitoba, Canada", "date": "spring and fall waves of the H1N1 pandemic", "R0 value": "1.55 to 2.24", "%CI values": "1.45 to 2.88", "method": "Richards model"}}]	2011-12-13 05:00:00
6psf7c3q	6psf7c3q	BACKGROUND: On 31 March 2013, the first human infections with the novel influenza A/H7N9 virus were reported in Eastern China. The outbreak expanded rapidly in geographic scope and size, with a total of 132 laboratory-confirmed cases reported by 3 June 2013, in 10 Chinese provinces and Taiwan. The incidence of A/H7N9 cases has stalled in recent weeks, presumably as a consequence of live bird mark…	Transmission potential of influenza A/H7N9, February to May 2013, China	1	disease name: influenza A/H7N9 location: China date: April and May 2013 R0 value: near 0.1 %CI values: 95% credible intervals by the Bayesian method (0.01 to 0.49) method: Bayesian approach combined with a SEIR (Susceptible-Exposed-Infectious-Removed) transmission model	[{"contribution":{"disease name": "influenza A/H7N9", "location": "China", "date": "April and May 2013", "R0 value": "near 0.1", "%CI values": "95% credible intervals by the Bayesian method (0.01 to 0.49)", "method": "Bayesian approach combined with a SEIR (Susceptible-Exposed-Infectious-Removed) transmission model"}}]	2013-10-02 10:00:00
4i5ocst8	4i5ocst8	Estimating the time-varying reproductive number, Rt, is critical for monitoring transmissibility of an infectious disease. The impact of imported cases on the estimation is rarely explored. We developed a model to estimate separately the Rt for local cases and imported cases, with accounting for imperfect contact tracing of cases. We applied this framework to data on COVID-19 outbreaks in Hong Ko…	Accounting for imported cases in estimating the time-varying reproductive number of COVID-19 in Hong Kong	-1	unanswerable	unanswerable	2021
xqrvl8pw	xqrvl8pw	Rapid growth of the B.1.617.2 variant of SARS-CoV-2 has been observed in many countries. Broadly, the factors driving the recent rapid growth of COVID-19 cases could be attributed to shorten generation intervals or higher transmissibility (effective reproduction number, R), or both. As such, establishing reasons for the observed rapid growth will allow countries to know how best to enhance their …	Serial intervals observed in SARS-CoV-2 B.1.617.2 variant cases	0	disease name: SARS-CoV-2 B.1.617.2 variant location: - date: - R0 value: - %CI values: - method: -	[{"contribution":{"disease name": "SARS-CoV-2 B.1.617.2 variant", "location": "-", "date": "-", "R0 value": "-", "%CI values": "-", "method": "-"}}]	2021-06-04 10:00:00
zccp5q72	zccp5q72	The raging COVID-19 pandemic is arguably the most important threat to global health presently. There is currently no vaccine or therapeutics and several interventions, mostly preventive measures have been proposed to reduce the spread of infection but the efficacy of these interventions, and their likely impact on the number of COVID-19 infections is unknown. In this study, we proposed the SEIQHR…	Mathematical modeling of COVID-19 infection dynamics in Ghana: Impact evaluation of integrated government and individual level interventions	-1	unanswerable	unanswerable	2021-01-22 05:00:00
7tzcxlbw	7tzcxlbw	BACKGROUND: COVID-19 outbreaks have occurred in homeless shelters across the US, highlighting an urgent need to identify the most effective infection control strategy to prevent future outbreaks. METHODS: We developed a microsimulation model of SARS-CoV-2 transmission in a homeless shelter and calibrated it to data from cross-sectional polymerase chain reaction (PCR) surveys conducted during COVI…	Comparison of infection control strategies to reduce COVID-19 outbreaks in homeless shelters in the United States: a simulation study	1	disease name: COVID-19 location: homeless shelters in the United States date: March 28 to April 10, 2020 R0 value: 2.9-6.2 %CI values: - method: microsimulation model of SARS-CoV-2 transmission in a homeless shelter and calibrated it to data from cross-sectional polymerase chain reaction (PCR) surveys conducted during COVID-19 outbreaks in five homeless shelters in three US cities	[{"contribution":{"disease name": "COVID-19", "location": "homeless shelters in the United States", "date": "March 28 to April 10, 2020", "R0 value": "2.9-6.2", "%CI values": "-", "method": "microsimulation model of SARS-CoV-2 transmission in a homeless shelter and calibrated it to data from cross-sectional polymerase chain reaction (PCR) surveys conducted during COVID-19 outbreaks in five homele…	2021
fc2q7fym	fc2q7fym	The effective reproduction number, R(t), is a central point in the study of infectious diseases. It establishes in an explicit way the extent of an epidemic spread process in a population. The current estimation methods for the time evolution of R(t), using incidence data, rely on the generation interval distribution, g(\tau), which is usually obtained from empirical data or already known distrib…	Estimating the effective reproduction number for heterogeneous models using incidence data	-1	unanswerable	unanswerable	2021-02-25 05:00:00
wdlvo4n2	wdlvo4n2	Whether meteorological factors influence COVID-19 transmission is an issue of major public health concern, but available evidence remains unclear and limited for several reasons, including the use of report date which can lag date of symptom onset by a considerable period. We aimed to generate reliable and robust evidence of this relationship based on date of onset of symptoms. We evaluated impor…	Meteorological conditions are heterogeneous factors for COVID-19 risk in China	-1	unanswerable	unanswerable	2021-04-16 10:00:00
cwvuyvrl	cwvuyvrl	The susceptible-exposed-infectious-recovered (SEIR) model is a widely used epidemiological model used to predict the rise in infections. This model has been widely used in different countries to predict the number of Coronavirus disease 2019 (Covid-19) cases. But the original SEIR model does not take into account the effect of factors such as lockdowns, vaccines, and re-infections. In India the f…	Modeling Effect of Lockdowns and Other Effects on India Covid-19 Infections Using SEIR Model and Machine Learning	-1	unanswerable	unanswerable	2022
1odpdgic	1odpdgic	Detecting changes in COVID-19 disease transmission over time is a key indicator of epidemic growth.Near real-time monitoring of the pandemic growth is crucial for policy makers and public health officials who need to make informed decisions about whether to enforce lockdowns or allow certain activities. The effective reproduction number Rt is the standard index used in many countries for this goa…	A COVINDEX based on a GAM beta regression model with an application to the COVID-19 pandemic in Italy	-1	unanswerable	unanswerable	2021-04-03 10:00:00
v60vv99o	v60vv99o	Since the re-emergence of Ebola in West Africa in 2014, comprehensive and stringent interventions have been implemented to decelerate the spread of the disease. The effectiveness of interventions still remains unclear. In this paper, we develop an epidemiological model that includes various controlling measures to systematically evaluate their effects on the disease transmission dynamics. By fitt…	Modeling the effect of comprehensive interventions on Ebola virus transmission	1	disease name: Ebola location: Guinea date: until March 22, 2015 R0 value: 1.2552 %CI values: - method: epidemiological model | disease name: Ebola location: Sierra Leone date: until March 22, 2015 R0 value: 1.6093 %CI values: - method: epidemiological model | disease name: Ebola location: Liberia date: until March 22, 2015 R0 value: 1.7994 %CI values: - method: epidemiological model	[{"contribution":{"disease name": "Ebola", "location": "Guinea", "date": "until March 22, 2015", "R0 value": "1.2552", "%CI values": "-", "method": "epidemiological model"}},{"contribution":{"disease name": "Ebola", "location": "Sierra Leone", "date": "until March 22, 2015", "R0 value": "1.6093", "%CI values": "-", "method": "epidemiological model"}},{"contribution":{"disease name": "Ebola", "loc…	2015-10-30 05:00:00		1183
phepjf55	phepjf55	BACKGROUND: Management of emerging infectious diseases such as the 2009 influenza pandemic A (H1N1) poses great challenges for real-time mathematical modeling of disease transmission due to limited information on disease natural history and epidemiology, stochastic variation in the course of epidemics, and changing case definitions and surveillance practices. FINDINGS: The Richards model and its …	On epidemic modeling in real time: An application to the 2009 Novel A (H1N1) influenza outbreak in Canada	1	disease name: 2009 Novel A (H1N1) influenza location: Canada date: April 1 to May 4 R0 value: 1.30 %CI values: (95% CI 1.12-1.47) method: Richards model and its variants | disease name: 2009 Novel A (H1N1) influenza location: Canada date: May 4 to June 19 R0 value: 1.35 %CI values: (95% CI 1.16-1.54) method: Richards model and its variants | disease name: 2009 Novel A (H1N1) influenza location: C…	[{"contribution":{"disease name": "2009 Novel A (H1N1) influenza", "location": "Canada", "date": "April 1 to May 4", "R0 value": "1.30", "%CI values": "(95% CI 1.12-1.47)", "method": "Richards model and its variants"}},{"contribution":{"disease name": "2009 Novel A (H1N1) influenza", "location": "Canada", "date": "May 4 to June 19", "R0 value": "1.35", "%CI values": "(95% CI 1.16-1.54)", "method"…	2010-11-05 05:00:00		1169
abs3tc3r	abs3tc3r	BACKGROUND: Despite several immunization efforts, China saw a resurgence of measles in 2012. Monitoring of transmissions of individuals from different age groups could offer information that would be valuable for planning adequate disease control strategies. We compared the age-specific effective reproductive numbers (R) of measles during 2009Ã¢â‚¬â€œ2016 in Guangdong, China. METHODS: We estimate…	Monitoring the age-specificity of measles transmissions during 2009-2016 in Southern China	-1	unanswerable	unanswerable	2018-10-08
62az1zqo	62az1zqo	Objective: The aim of this study is to analyze the latent class of basic reproduction number (R(0)) trends of the 2019 novel coronavirus disease (COVID-19) in the major endemic areas of China. Methods: The provinces that reported more than 500 cases of COVID-19 till February 18, 2020 were selected as the major endemic areas. The Verhulst model was used to fit the growth rate of cumulative confirm…	Basic Reproduction Number of the 2019 Novel Coronavirus Disease in the Major Endemic Areas of China: A Latent Profile Analysis	1	disease name: 2019 novel coronavirus disease (COVID-19) location: Major Endemic Areas of China date: till February 18, 2020 R0 value: 1.84-3.18 %CI values: - method: Verhulst model (calculated from SARS parameters) | disease name: 2019 novel coronavirus disease (COVID-19) location: Major Endemic Areas of China date: till February 18, 2020 R0 value: 1.74-2.91 %CI values: - method: Verhulst model (…	[{"contribution":{"disease name": "2019 novel coronavirus disease (COVID-19)", "location": "Major Endemic Areas of China", "date": "till February 18, 2020", "R0 value": "1.84-3.18", "%CI values": "-", "method": "Verhulst model (calculated from SARS parameters)"}},{"contribution":{"disease name": "2019 novel coronavirus disease (COVID-19)", "location": "Major Endemic Areas of China", "date": "till…	2021-09-14		1419
e35o9t85	e35o9t85	Background & Objective: Screening and timely diagnosis of positive individuals is one of the important issues in controlling pandemic of Covid-19. Early and timely diagnosis of asymptomatic individuals, contact tracking, disconnection of Covid-19 transmission chain through early detection of patients and decreasing R0 were the main objectives of the current study. Materials & Methods: The Covid-1…	Outpatient Screening Project for Suspected Covid-19 Patients in Zanjan Province, Iran	1	disease name: Covid-19 location: Zanjan Province, Iran date: March 26, 2020 R0 value: 1.4 %CI values: - method: Covid-19 outpatient sampling detection project	[{"contribution":{"disease name": "Covid-19", "location": "Zanjan Province, Iran", "date": "March 26, 2020", "R0 value": "1.4", "%CI values": "-", "method": "Covid-19 outpatient sampling detection project"}}]	2022
z56dmve7	z56dmve7	BACKGROUND: The COVID-19 pandemic has disproportionately impacted the most vulnerable and widened the health disparity gap in both physical and mental well-being. Consequentially, it is vital to understand how to best support elderly individuals, particularly Black Americans and people of low socioeconomic status, in navigating stressful situations during the COVID-19 pandemic and beyond. The aim…	Racial and socioeconomic status differences in stress, posttraumatic growth, and mental health in an older adult cohort during the COVID-19 pandemic	-1	unanswerable	unanswerable	2022-03-13 05:00:00
fk0ba1yz	fk0ba1yz	The SARS-CoV-2 pathogen is currently spreading worldwide and its propensity for presymptomatic and asymptomatic transmission makes it difficult to control. The control measures adopted in several countries aim at isolating individuals once diagnosed, limiting their social interactions and consequently their transmission probability. These interventions, which have a strong impact on the disease d…	On realized serial and generation intervals given control measures: The COVID-19 pandemic case	-1	unanswerable	unanswerable	2021
oqla9bnr	oqla9bnr	INTRODUCTION: Growing evidence has documented the adverse impact of the global coronavirus pandemic on sleep quality. Older adults may be especially susceptible to declines in sleep quality for multiple reasons, including their elevated risk of social isolation and loneliness during the pandemic. Given the adverse health consequences of poor sleep, there is a need to identify resilience factors t…	221 Social Integration and Sleep Quality during the COVID-19 Pandemic: Prospective Evidence from a Study of Retired Older Adults	-1	unanswerable	unanswerable	2021-05-03 10:00:00
vophc838	vophc838	This research quantifies the various South African lockdown regimes, for the SARS-CoV-2 pandemic, in terms of the basic reproduction number, $r_0$. It further calculates the levels of immunity required in order for these selfsame lockdown regimes to begin to work. The first, level-5 lockdown was a valiant attempt to contain the highly infectious, SARS-CoV-2 virus, based on a limited knowledge. It…	Quantification of the South African Lockdown Regimes, for the SARS-CoV-2 Pandemic, and the Levels of Immunity They Require to Work	1	disease name: SARS-CoV-2 location: Swedish context date: - R0 value: 3.09 %CI values: - method: -	[{"contribution":{"disease name": "SARS-CoV-2", "location": "Swedish context", "date": "-", "R0 value": "3.09", "%CI values": "-", "method": "-"}}]	2020-06-02
28mfnhsl	28mfnhsl	Action plans against the current SARS-CoV-2 pandemic have been implemented around the globe in order to reduce transmission. The reproduction number has been found to respond to public health interventions changing throughout the pandemic waves. However, the actual global burden of SARS-CoV-2 remains unknown due to severe under-ascertainment of cases. The use of reported deaths has been pointed o…	A modelling framework for the analysis of the transmission of SARS-CoV2	-1	unanswerable	unanswerable	2022-03-07 05:00:00
luip8wly	luip8wly	Although efficacious vaccines have significantly reduced the morbidity and mortality of COVID-19, there remains an unmet medical need for treatment options, which monoclonal antibodies (mAbs) can potentially fill. This unmet need is exacerbated by the emergence and spread of SARS-CoV-2 variants of concern (VOCs) that have shown some resistance to vaccine responses. Here we report the isolation of…	A combination of potently neutralizing monoclonal antibodies isolated from an Indian convalescent donor protects against the SARS-CoV-2 Delta variant	-1	unanswerable	unanswerable	2022-04-28 10:00:00
09yxnwzy	09yxnwzy	A Rift Valley fever (RVF) epidemic affecting animals on domestic livestock farms was reported in South Africa during JanuaryÃ¢â‚¬â€œAugust 2010. The first cases occurred after heavy rainfall, and the virus subsequently spread countrywide. To determine the possible effect of environmental conditions and vaccination on RVF virus transmissibility, we estimated the effective reproduction number (R(e)…	Transmission Potential of Rift Valley Fever Virus over the Course of the 2010 Epidemic in South Africa	-1	unanswerable	unanswerable	2013-06-03
xdub2wxo	xdub2wxo	Key high transmission dates for the year 2020 are used to create scenarios to model the evolution of the COVID-19 pandemic in several states of Mexico for 2021. These scenarios are obtained through the estimation of a time-dependent contact rate, where the main assumption is that the dynamic of the disease is heavily determined by the mobility and social activity of the population during holidays…	COVID-19 epidemic scenarios into 2021 based on observed key superdispersion events	-1	unanswerable	unanswerable	2021-04-20 10:00:00
pmmtpmka	pmmtpmka	In 2019, a new infectious disease called pandemic COVID-19 began to spread from Wuhan, China. In spite of the efforts to stop the disease, being out of the control of the governments it spread rapidly all over the world. From then on, much research has been done in the world with the aim of controlling this contagious disease. A mathematical model for modeling the spread of COVID-19 and also cont…	Controlling of Pandemic COVID-19 Using Optimal Control Theory	-1	unanswerable	unanswerable	2021
kqqmhi7f	kqqmhi7f	As of May 14, 2020, Italy has been one of the red hotspots for the COVID-19 pandemic. In particular, the regions of Emilia Romagna, Piedmont, and especially Lombardy were the most affected and had to face very serious health emergencies, which brought them to the brink of collapse. Since the virus has demonstrated local properties, i.e., greater severity and contagiousness in specific regions, th…	Modeling the Epidemiological Trend and Behavior of COVID-19 in Italy	0	disease name: SARS-CoV-2 location: Italy date: February 22 to March 14, 2020 R0 value: - %CI values: - method: computational simulation of the Susceptible-Exposed-Infectious-Recovered (S.E.I.R.) mode	[{"contribution":{"disease name": "SARS-CoV-2", "location": "Italy", "date": "February 22 to March 14, 2020", "R0 value": "-", "%CI values": "-", "method": "computational simulation of the Susceptible-Exposed-Infectious-Recovered (S.E.I.R.) mode"}}]	2020-08-20 10:00:00
mtvv1j02	mtvv1j02	The 2019 novel coronavirus disease (COVID-19) outbreaks that emerged in Wuhan city, Hubei province, have led to a formidable number of confirmed cases that resulted in &gt;5,700 deaths globally, including 143 countries in all 6 continents. The World Health Organization declared a Public Health Emergency of International Concern with a very high level of global risk assessment. Severe acute respir…	2019 Novel Coronavirus Disease Outbreak and Molecular Genetic Characteristics of Severe Acute Respiratory Syndrome-coronavirus-2	-1	unanswerable	unanswerable	2020
4c18f8nz	4c18f8nz	Human to human transmissible infectious diseases spread in a population using human interactions as its transmission vector. The early stages of such an outbreak can be modeled by a graph whose edges encode these interactions between individuals, the vertices. This article attempts to account for the case when each individual entails in different kinds of interactions which have therefore differe…	Early epidemic spread, percolation and Covid-19	-1	unanswerable	unanswerable	2020-06-08 10:00:00
fsrdu4tq	fsrdu4tq	After two months from the first case in COVID-19 outbreak, Italy counts more than 190,000 confirmed positive cases. From the beginning of April 2020, the nationwide lockdown started to show early effects by reducing the total cumulative incidence reached by the epidemic wave. This allows the government to program the measures to loosen lockdown restrictions for the so called "Phase 2". Here we pr…	COVID-19 outbreak in Italy: estimation of reproduction numbers over two months toward the Phase 2	1	disease name: COVID-19 location: Italy date: February 24th to April 24th, 2020 R0 value: 3.29 %CI values: - method: -	[{"contribution":{"disease name": "COVID-19", "location": "Italy", "date": "February 24th to April 24th, 2020", "R0 value": "3.29", "%CI values": "-", "method": "-"}}]	2020-05-18 10:00:00
ie3aq6tp	ie3aq6tp	PurposeThe purpose of this paper is to investigate the effects of irregular unsettling on the smoking model in form of the stochastic model as in the deterministic model these effects are neglected for simplicity.Design/methodology/approachIn this research, the authors investigate a stochastic smoking system in which the contact rate is perturbed by LÃƒÂ©vy noise to control the trend of smoking. …	A stability analysis on a smoking model with stochastic perturbation	-1	unanswerable	unanswerable	2022
qkk4r0co	qkk4r0co	Background: On 30 January 2020, the World Health Organization declared the novel severe acute respiratory syndrome coronavirus-2 to be a Public Health Emergency of International Concern. Egypt is among the five countries reporting the highest number of cases in Africa. Aims: We aimed to provide an overview of the epidemic features of COVID-19 in Egypt in order to help guide an effective lockdown-…	Epidemiology of SARS-CoV-2 in Egypt	1	disease name: COVID-19 location: Egypt date: As of 21 May 2020 R0 value: 2.6 %CI values: ±1.55 method: incidence proportions, case fatality rates (CFR), growth rates, doubling time (Td), basic reproductive number (R0) and Herd Immunity Threshold (HIT) were calculated weekly and reviewed	[{"contribution":{"disease name": "COVID-19", "location": "Egypt", "date": "As of 21 May 2020", "R0 value": "2.6", "%CI values": "±1.55", "method": "incidence proportions, case fatality rates (CFR), growth rates, doubling time (Td), basic reproductive number (R0) and Herd Immunity Threshold (HIT) were calculated weekly and reviewed"}}]	2020
2itihmi8	2itihmi8	Vitamin D deficiency (VDD) is thought to play a role in determining the outcomes of COVID-19. India has a high prevalence of VDD. We hypothesized that VDD as measured by serum 25-hydroxyvitamin D (25OHD) &amp;lt;20 ng/mL is associated with severe COVID-19 infection. Outcomes were assessed by the WHO ordinal scale for clinical improvement (OSCI)1, the need for oxygen therapy, admission to an inten…	Lack of Association Between 25-Hydroxyvitamin D Level and Outcomes in Hospitalized Indian Patients With COVID-19	-1	unanswerable	unanswerable	2021
hmc33cty	hmc33cty	It is generally agreed that striking a balance between resuming economic and social activities and keeping the effective reproductive number (R0) below 1 using non-pharmaceutical interventions is an important goal until and even after effective vaccines become available. Therefore, the need remains to understand how the virus is transmitted in order to identify high-risk environments and activiti…	SARS-CoV-2 transmission dynamics should inform policy	-1	unanswerable	unanswerable	2020
vqoxd64i	vqoxd64i	The Democratic Republic of the Congo has experienced the most outbreaks of Ebola virus disease since the virus' discovery in 1976. This article provides for the first time a description and a line list for all outbreaks in this country, comprising 996 cases. Compared to patients over 15 years old, the odds of dying were significantly lower in patients aged 5 to 15 and higher in children under fiv…	Ebola virus disease in the Democratic Republic of the Congo, 1976-2014	-1	unanswerable	unanswerable	2015-11-03
995zs8xb	995zs8xb	Modeling the dynamics of COVID-19 pandemic spread is a challenging and relevant problem. Established models for the epidemic spread such as compartmental epidemiological models e.g. Susceptible-Infected-Recovered (SIR) models and its variants, have been discussed extensively in the literature and utilized to forecast the growth of the pandemic across different hot-spots in the world. The standard…	Network-based Modeling of COVID-19 Dynamics: Early Pandemic Spread in India	-1	unanswerable	unanswerable	2021-03-20 05:00:00
h1i7otfd	h1i7otfd	A pandemic caused by a new coronavirus has spread worldwide, causing an epidemic in Argentina. We implement an SEIR model to analyze the evolution of the disease in Buenos Aires and neighbouring cities (RMBA) with 15 million inhabitants. The parameters of the model are calibrated by using as data the number of casualties officially reported. Since infinite solutions honour the data, we show a set…	A numerical simulation of the COVID-19 epidemic in Argentina using the SEIR model	1	disease name: COVID-19 location: Buenos Aires and neighbouring cities (RMBA) date: initially R0 value: 3.33 %CI values: - method: SEIR model | disease name: COVID-19 location: Buenos Aires and neighbouring cities (RMBA) date: April 8, after the lockdown R0 value: 0.95 %CI values: - method: SEIR model | disease name: COVID-19 location: Buenos Aires and neighbouring cities (RMBA) date: after April …	[{"contribution":{"disease name": "COVID-19", "location": "Buenos Aires and neighbouring cities (RMBA)", "date": "initially", "R0 value": "3.33", "%CI values": "-", "method": "SEIR model"}},{"contribution":{"disease name": "COVID-19", "location": "Buenos Aires and neighbouring cities (RMBA)", "date": "April 8, after the lockdown", "R0 value": "0.95", "%CI values": "-", "method": "SEIR model"}},{"…	2020-05-12 10:00:00		479
nzbopcxg	nzbopcxg	BACKGROUND: In December 2019, a pneumonia caused by a novel coronavirus (SARS-CoV-2) emerged in Wuhan, China and has rapidly spread around the world since then. AIM: This study aims to understand the research gaps related to COVID-19 and propose recommendations for future research. METHODS: We undertook a scoping review of COVID-19, comprehensively searching databases and other sources to identif…	Coronavirus disease (COVID-19): a scoping review	-1	unanswerable	unanswerable	2020-04-16 10:00:00
luhkbfzz	luhkbfzz	Based on the reported data from February 16, 2020 to March 9, 2020 in South Korea including confirmed cases, death cases and recovery cases, the control reproduction number was estimated respectively at different control measure phases using Markov chain Monte Carlo method and presented using the resulting posterior mean and 95% credible interval (CrI). At the early phase from February 16 to Febr…	Phase-adjusted estimation of the COVID-19 outbreak in South Korea under multi-source data and adjustment measures: a modelling study.	1	disease name: COVID-19 location: South Korea date: from February 16 to February 24 R0 value: 4.79 %CI values: 95% CrI 4.38 - 5.2 method: Markov chain Monte Carlo method	[{"contribution":{"disease name": "COVID-19", "location": "South Korea", "date": "from February 16 to February 24", "R0 value": "4.79", "%CI values": "95% CrI 4.38 - 5.2", "method": "Markov chain Monte Carlo method"}}]	2020-05-18
5zzqt1vp	5zzqt1vp	Objective: To describe the basic characteristics of clusters of coronavirus diseases 2019 (COVID-19) cases in Ningbo, Zhejiang province, and evaluate the generation time (Tg) and basic reproduction number (R(0)) of COVID-19. Methods: The basic information and onset times of the clusters of COVID-19 cases in Ningbo were investigated, the inter-generational interval of the cases were fitted by usin…	[Study on transmission dynamic of 15 clusters of coronavirus disease 2019 cases in Ningbo].	1	disease name: coronavirus diseases 2019 (COVID-19) location: Ningbo, Zhejiang province date: January 23 to February 4 R0 value: 3.06 %CI values: 95%CI: 2.64 - 3.51 method: SEIR Model	[{"contribution":{"disease name": "coronavirus diseases 2019 (COVID-19)", "location": "Ningbo, Zhejiang province", "date": "January 23 to February 4", "R0 value": "3.06", "%CI values": "95%CI: 2.64 - 3.51", "method": "SEIR Model"}}]	2020-05-13
toizrp89	toizrp89	Background and Objective To analyze the impact of different patterns of migration flow in two cities, Hefei and Shenzhen, on the epidemic and disease control of Coronavirus Disease 2019 (COVID-19), in order to provide insight for making differentiated controlling policies. Methods We collected demographic and epidemiological information of confirmed COVID-19 cases in Hefei and Shenzhen between Ja…	Association of Population Migration and Coronavirus Disease 2019 Epidemic Control	0	disease name: COVID-19 location: Hefei date: January 19 and February 11, 2020 R0 value: - %CI values: - method: - | disease name: COVID-19 location: Shenzhen date: January 19 and February 11, 2020 R0 value: - %CI values: - method: -	[{"contribution":{"disease name": "COVID-19", "location": "Hefei", "date": "January 19 and February 11, 2020", "R0 value": "-", "%CI values": "-", "method": "-"}},{"contribution":{"disease name": "COVID-19", "location": "Shenzhen", "date": "January 19 and February 11, 2020", "R0 value": "-", "%CI values": "-", "method": "-"}}]	2020-02-20 05:00:00		834
osv673g3	osv673g3	INTRODUCTION: Epidemic forecasting and prediction tools have the potential to provide actionable information in the midst of emerging epidemics. While numerous predictive studies were published during the 2016Ã¢â‚¬â€œ2017 Zika Virus (ZIKV) pandemic, it remains unknown how timely, reproducible, and actionable the information produced by these studies was. METHODS: To improve the functional use of …	A systematic review and evaluation of Zika virus forecasting and prediction research during a public health emergency of international concern	-1	unanswerable	unanswerable	2019-10-04
3xwfitl6	3xwfitl6	Background: Compartmental models may help deciding on public health interventions. They were used during the first French COVID-19 lockdown to estimate the reproduction numbers and predict the number of hospital beds required. This study aimed to assess the ability of similar compartmental models to reflect equivalent epidemic dynamics. Methods: The study considered three compartmental models ind…	Lessons learnt from the use of compartmental models over the COVID-19 induced lockdown in France	-1	unanswerable	unanswerable	2021-01-13 05:00:00
as7sw98q	as7sw98q	Oxide nano-springs have attracted many research interests because of their anti-corrosion, high-temperature tolerance, oxidation resistance, and enhanced-mechanic-response from unique helix structures, enabling various nano-manipulators, nano-motors, nano-switches, sensors, and energy harvesters. However, preparing oxide nano-springs is a challenge for their intrinsic lack of elasticity. Here, we…	Self-assembled Epitaxial Ferroelectric Oxide Nano-spring with Super-scalability	-1	unanswerable	unanswerable	2022
dr1ym2mb	dr1ym2mb	The quarantine of people suspected of being exposed to an infectious agent is one of the most basic public health measure that has historically been used to combat the spread of communicable diseases in human communities. This study presents a new deterministic model for assessing the population-level impact of the quarantine of individuals suspected of being exposed to disease on the spread of t…	Modeling the impact of quarantine during an outbreak of Ebola virus disease	-1	unanswerable	unanswerable	2019-02-05
nc4fc9wy	nc4fc9wy	Background: Obesity and diabetes have been independently linked to COVID-19 severity, but their joint impact has not been extensively investigated. This study examines the joint and mediating role of diabetes and weight in COVID-19 severity and mortality in a large sample of patients treated in a large urban hospital located in Southern California.Methods: A retrospective observational cohort stu…	The Obesity-COVID-19 Relationship: How Much Do Diabetes and Age Matter?	-1	unanswerable	unanswerable	2021
1swcrydm	1swcrydm	BACKGROUND: Non-pharmaceutical interventions (NPIs) have been implemented worldwide to curb COVID-19 spread. Belarus is a rare case of a country with a relatively modern healthcare system, where highly limited NPIs have been enacted. Thus, investigation of Belarusian COVID-19 dynamics is essential for the local and global assessment of the impact of NPI strategies. METHODS: We integrate genomic e…	SARS-CoV-2 transmission dynamics in Belarus in 2020 revealed by genomic and incidence data analysis	-1	unanswerable	unanswerable	2021-09-16 10:00:00
n9itt63j	n9itt63j	BACKGROUND: As governments across Europe have issued non-pharmaceutical interventions (NPIs) such as social distancing and school closing, the mobility patterns in these countries have changed. Most states have implemented similar NPIs at similar time points. However, it is likely different countries and populations respond differently to the NPIs and that these differences cause mobility pattern…	Estimating the impact of mobility patterns on COVID-19 infection rates in 11 European countries	-1	unanswerable	unanswerable	2020-09-15 10:00:00
5z012sr6	5z012sr6	The first case of coronavirus disease 2019 (COVID-19) in Japan was reported on 15 January 2020 and the number of reported cases has increased day by day. The purpose of this study is to give a prediction of the epidemic peak for COVID-19 in Japan by using the real-time data from 15 January to 29 February 2020. Taking into account the uncertainty due to the incomplete identification of infective p…	Prediction of the Epidemic Peak of Coronavirus Disease in Japan, 2020	0	disease name: COVID-19 location: Japan date: 15 January 2020 to 29 February 2020 R0 value: - %CI values: - method: least-square-based method with Poisson noise	[{"contribution":{"disease name": "COVID-19", "location": "Japan", "date": "15 January 2020 to 29 February 2020", "R0 value": "-", "%CI values": "-", "method": "least-square-based method with Poisson noise"}}]	2020-03-13 05:00:00
v5js0ssk	v5js0ssk	BACKGROUD: Effective communication of accurate information through social media constitutes an important component of public health interventions in modern time, when traditional public health approaches such as contact tracing, quarantine and isolation are among the few options for the containing the disease spread in the population. The success of control of COVID-19 outbreak started from Wuhan…	Quantify the role of superspreaders -opinion leaders- on COVID-19 information propagation in the Chinese Sina-microblog	-1	unanswerable	unanswerable	2020
h7907xv5	h7907xv5	After national case-based surveillance for pandemic influenza A (H1N1) ceased on July 23, 2009, a daily case-based surveillance system was implemented in Maebashi City, Japan. All medical facilities in the city reported all patients who had positive rapid antigen tests for influenza A. When the epidemic exploded in late October, case-based surveillance for influenza-like illness (ILI) was impleme…	Case-Based Surveillance of Pandemic (H1N1) 2009 in Maebashi City, Japan.	1	disease name: Influenza A (H1N1) 2009 location: Maebashi City, Japan date: September 30 to October 14 R0 value: 1.48 %CI values: (95% confidence interval, 1.41-1.56) method: next-generation matrix	[{"contribution":{"disease name": "Influenza A (H1N1) 2009", "location": "Maebashi City, Japan", "date": "September 30 to October 14", "R0 value": "1.48", "%CI values": "(95% confidence interval, 1.41-1.56)", "method": "next-generation matrix"}}]	2012
fvmssufn	fvmssufn	BACKGROUND: Despite recent achievements in vaccines, antiviral drugs, and medical infrastructure, the emergence of COVID-19 has posed a serious threat to humans worldwide. Most countries are well connected on a global scale, making it nearly impossible to implement perfect and prompt mitigation strategies for infectious disease outbreaks. In particular, due to the explosive growth of internationa…	Risk Assessment of Importation and Local Transmission of COVID-19 in South Korea: Statistical Modeling Approach	1	disease name: COVID-19 location: South Korea date: - R0 value: 1.87 %CI values: (95% CI 1.47-2.34) method: statistical model	[{"contribution":{"disease name": "COVID-19", "location": "South Korea", "date": "-", "R0 value": "1.87", "%CI values": "(95% CI 1.47-2.34)", "method": "statistical model"}}]	2021
mosiakop	mosiakop	The recent COVID-19 pandemic highlighted the need of non-pharmaceutical interventions in the first stages of a pandemic. Among these, lockdown policies proved unavoidable yet extremely costly from an economic perspective. To better understand the tradeoffs between economic and epidemic costs of lockdown interventions, we here focus on a simple SIR epidemic model and study lockdowns as solutions t…	Lockdown interventions in SIR model: Is the reproduction number the right control variable?	-1	unanswerable	unanswerable	2021-12-13 05:00:00
79dzsxpi	79dzsxpi	This paper presents a deep learning framework for epidemiology system identification from noisy and sparse observations with quantified uncertainty. The proposed approach employs an ensemble of deep neural networks to infer the time-dependent reproduction number of an infectious disease by formulating a tensor-based multi-step loss function that allows us to efficiently calibrate the model on mul…	COVID-19 dynamics across the US: A deep learning study of human mobility and social behavior	0	disease name: COVID-19 location: US date: 66 days R0 value: - %CI values: - method: a deep learning framework for epidemiology system identification from noisy and sparse observations with quantified uncertainty	[{"contribution":{"disease name": "COVID-19", "location": "US", "date": "66 days", "R0 value": "-", "%CI values": "-", "method": "a deep learning framework for epidemiology system identification from noisy and sparse observations with quantified uncertainty"}}]	2020-09-23 10:00:00
q1xkto4d	q1xkto4d	To flatten the curve of the natural epidemic of covid-19, many countries adopted lockdown or isolation resulting in the containment of the SARS-CoV-2 transmission. However, an important question arises about the strategies of release of isolated persons to avoid overloaded hospitals and increased deaths. Sao Paulo State (Brazil) implemented the isolation of the population in non- essential activi…	Evaluating the impacts of release in Sao Paulo State (Brazil) on the epidemic of covid-19 based on mathematical model	-1	unanswerable	unanswerable	2020-08-14 10:00:00
rr23gz2r	rr23gz2r	INTRODUCTION: SARS-CoV-2 was declared a pandemic by the WHO on March 11th, 2020. Public protective measures were enforced in every country to limit the diffusion of SARS-CoV-2. Its transmission, mainly by droplets, has been measured by the effective reproduction number (Rt) that counts the number of secondary cases caused in a population by an average infectious individual at time t. Current stra…	Early prediction of SARS-CoV-2 reproductive number from environmental, atmospheric and mobility data: A supervised machine learning approach	-1	unanswerable	unanswerable	2022-04-01 10:00:00
xb0r2axf	xb0r2axf	Compartmental transmission models have become an invaluable tool to study the dynamics of infectious diseases. The Susceptible-Infectious-Recovered (SIR) model is known to have an exact semi-analytical solution. In the current study, the approach of Harko et al. (Appl. Math. Comput. 236:184Ã¢â‚¬â€œ194, 2014) is generalised to obtain an approximate semi-analytical solution of the Susceptible-Expos…	The approximately universal shapes of epidemic curves in the Susceptible-Exposed-Infectious-Recovered (SEIR) model	-1	unanswerable	unanswerable	2020-11-09
xrm49ycj	xrm49ycj	This work is the consideration of a fractal fractional mathematical model on the transmission and control of corona virus (COVID-19), in which the total population of an infected area is divided into susceptible, infected and recovered classes. We consider a fractal-fractional order SIR type model for investigation of Covid-19. To realize the transmission and control of corona virus in a much bet…	Fractal-Fractional Mathematical Model Addressing the Situation of Corona Virus in Pakistan	0	disease name: COVID-19 location: Pakistan date: - R0 value: - %CI values: - method: fractal fractional mathematical model	[{"contribution":{"disease name": "COVID-19", "location": "Pakistan", "date": "-", "R0 value": "-", "%CI values": "-", "method": "fractal fractional mathematical model"}}]	2020
bv7chwur	bv7chwur	BACKGROUND: The dynamics of vaccination against SARS-CoV-2 are complicated by age-dependent factors, changing levels of infection, and the relaxation of non-pharmaceutical interventions (NPIs) as the perceived risk declines, necessitating the use of mathematical models. Our aims were to use epidemiological data from the UK together with estimates of vaccine efficacy to predict the possible long-t…	Vaccination and non-pharmaceutical interventions for COVID-19: a mathematical modelling study	1	disease name: SARS-CoV-2 location: UK date: January, 2021- January, 2024 R0 value: 1.58 %CI values: 95% CI 1.36-1.84 method: mathematical model	[{"contribution":{"disease name": "SARS-CoV-2", "location": "UK", "date": "January, 2021- January, 2024", "R0 value": "1.58", "%CI values": "95% CI 1.36-1.84", "method": "mathematical model"}}]	2021
db1p281r	db1p281r	Coronavirus disease 2019 (COVID-19), which causes severe respiratory illness, has become a pandemic. The World Health Organization has declared it a public health crisis of international concern. We developed a susceptible, exposed, infected, recovered (SEIR) model for COVID-19 to show the importance of estimating the reproduction number (R0). This work is focused on predicting the COVID-19 outbr…	Estimation of the reproduction number and early prediction of the COVID-19 outbreak in India using a statistical computing approach	1	disease name: COVID-19 location: India date: March 2, 2020 to April 2, 2020 R0 value: 1.471 %CI values: (95% confidence interval [CI], 1.351 to 1.592) method: earlyR package	[{"contribution":{"disease name": "COVID-19", "location": "India", "date": "March 2, 2020 to April 2, 2020", "R0 value": "1.471", "%CI values": "(95% confidence interval [CI], 1.351 to 1.592)", "method": "earlyR package"}}]	2020
pwelmjdz	pwelmjdz	After a year of living with the COVID-19 pandemic and its associated consequences, hope looms on the horizon thanks to vaccines. The question is what percentage of the population needs to be immune to reach herd immunity, that is to avoid future outbreaks. The answer depends on the basic reproductive number, R 0 , a key epidemiological parameter measuring the transmission capacity of a disease. B…	Caveats on COVID-19 Herd Immunity Threshold: the Spain case	1	disease name: COVID-19 location: Spain date: - R0 value: 1.39 to 3.10 %CI values: - method: Different combinations of characteristics of the population and their environment, accuracy of data, and generation time distribution.	[{"contribution":{"disease name": "COVID-19", "location": "Spain", "date": "-", "R0 value": "1.39 to 3.10", "%CI values": "-", "method": "Different combinations of characteristics of the population and their environment, accuracy of data, and generation time distribution."}}]	2021
ydut43dg	ydut43dg	A compartmental epidemiological model with seven groups is introduced herein, to account for the dissemination of diseases similar to the Coronavirus disease 2019 (COVID-19). In its simplified version, the model contains ten parameters, four of which relate to characteristics of the virus, whereas another four are transition probabilities between the groups;the last two parameters enable the empi…	A Compartmental Epidemiological Model for the Dissemination of the COVID-19 Disease	1	disease name: Coronavirus disease 2019 (COVID-19) location: Five countries (to be specific, of those which had suffered most fatalities by April 30, 2020) date: April 30, 2020 R0 value: 4.91(33) %CI values: - method: compartmental epidemiological model with seven groups	[{"contribution":{"disease name": "Coronavirus disease 2019 (COVID-19)", "location": "Five countries (to be specific, of those which had suffered most fatalities by April 30, 2020)", "date": "April 30, 2020", "R0 value": "4.91(33)", "%CI values": "-", "method": "compartmental epidemiological model with seven groups"}}]	2020
zo9yngfc	zo9yngfc	Andalusia (Southern Spain) is considered one of the main routes of introduction of bluetongue virus (BTV) into Europe, evidenced by a devastating epidemic caused by BTV-1 in 2007. Understanding the pattern and the drivers of BTV-1 spread in Andalusia is critical for effective detection and control of future epidemics. A long-standing metric for quantifying the behaviour of infectious diseases is …	Understanding Spatio-Temporal Variability in the Reproduction Ratio of the Bluetongue (BTV-1) Epidemic in Southern Spain (Andalusia) in 2007 Using Epidemic Trees	-1	unanswerable	unanswerable	2016-03-10
hfoy148w	hfoy148w	Countries around the globe have implemented unprecedented measures to mitigate the coronavirus disease 2019 (COVID-19) pandemic. We aim to predict the COVID-19 disease course and compare the effectiveness of mitigation measures across countries to inform policy decision making using a robust and parsimonious survival-convolution model. We account for transmission during a pre-symptomatic incubati…	Survival-Convolution Models for Predicting COVID-19 Cases and Assessing Effects of Mitigation Strategies	-1	unanswerable	unanswerable	2020-07-03 10:00:00
496b4cow	496b4cow	The impact of the outbreak of COVID-19 on health has been widely concerned. Disease risk assessment, prediction, and early warning have become a significant research field. Previous research suggests that there is a relationship between air quality and the disease. This paper investigated the impact of the atmospheric environment on the basic reproduction number (R$_0$) in Australia, South Korea,…	The short-term seasonal analyses between atmospheric environment and COVID-19 in epidemic areas of Cities in Australia, South Korea, and Italy	-1	unanswerable	unanswerable	2020
756kgzjh	756kgzjh	A susceptible-infectious-recovered (SIRS) epidemic model with a generalized nonmonotone incidence rate kIS 1 + ÃƒÅ¸ I + &#945; I 2 ( ÃƒÅ¸ > - 2 &#945; such that 1 + ÃƒÅ¸ I + &#945; I 2 > 0 for all I &#8805; 0 ) is considered in this paper. It is shown that the basic reproduction number R 0 does not act as a threshold value for the disease spread anymore, and there exists a sub-threshold value R &…	Global Dynamics of a Susceptible-Infectious-Recovered Epidemic Model with a Generalized Nonmonotone Incidence Rate	-1	unanswerable	unanswerable	2020
ug8ua7xr	ug8ua7xr	[...]the authors state "many estimations methods [for infection date] homogenize substantial heterogeneities," but they disregard this in their demonstration of recovering infection date in Figure 2: "infection dates were estimated as symptom onset dates minus a median incubation period. "1(p2129) Although this is straightforward to calculate, it ignores the "substantial heterogeneities," and lea…	Further Improving Analysis of Date-Based COVID-19 Surveillance Data/Respond	-1	unanswerable	unanswerable	2022
6epfkl3g	6epfkl3g	The current COVID-19 pandemic has caused several damages to the world, especially in public health sector. This study considered a simple deterministic SIR (Susceptible- Infectious-Recovered) model to characterize and predict future course of the pandemic in the West African countries. We estimated specific characteristics of the disease's dynamics such as its initial conditions, reproduction num…	Modeling COVID-19 dynamics in the sixteen West African countries	1	disease name: COVID-19 location: West African countries date: - R0 value: 1.15 (Burkina-Faso) and 4.45 (Niger) %CI values: - method: simple deterministic SIR (Susceptible- Infectious-Recovered) model	[{"contribution":{"disease name": "COVID-19", "location": "West African countries", "date": "-", "R0 value": "1.15 (Burkina-Faso) and 4.45 (Niger)", "%CI values": "-", "method": "simple deterministic SIR (Susceptible- Infectious-Recovered) model"}}]	44081
ua97aen7	ua97aen7	The ongoing pandemic situation due to COVID-19 originated from the Wuhan city, China affects the world in an unprecedented scale. Unavailability of totally effective vaccination and proper treatment regimen forces to employ a non-pharmaceutical way of disease mitigation. The world is in desperate demand of useful control intervention to combat the deadly virus. This manuscript introduces a new ma…	The effectiveness of contact tracing in mitigating COVID-19 outbreak: A model-based analysis in the context of India	0	disease name: COVID-19 location: India date: - R0 value: - %CI values: - method: Mathematical Model	[{"contribution":{"disease name": "COVID-19", "location": "India", "date": "-", "R0 value": "-", "%CI values": "-", "method": "Mathematical Model"}}]	2021		878
mg3sk73z	mg3sk73z	We study a novel multi-strain SIR epidemic model with selective immunity by vaccination. A newer strain is made to emerge in the population when a preexisting strain has reached equilbrium. We assume that this newer strain does not exhibit cross-immunity with the original strain, hence those who are vaccinated and recovered from the original strain become susceptible to the newer strain. Recent e…	The local stability of a modified multi-strain SIR model for emerging viral strains	0	disease name: COVID-19 location: - date: - R0 value: - %CI values: - method: a novel multi-strain SIR epidemic model	[{"contribution":{"disease name": "COVID-19", "location": "-", "date": "-", "R0 value": "-", "%CI values": "-", "method": "a novel multi-strain SIR epidemic model"}}]	2020
vljil7r8	vljil7r8	Mathematical modelling performs a vital part in estimating and controlling the recent outbreak of coronavirus disease 2019 (COVID-19). In this epidemic, most countries impose severe intervention measures to contain the spread of COVID-19. The policymakers are forced to make difficult decisions to leverage between health and economic development. How and when to make clinical and public health dec…	An evaluation of mathematical models for the outbreak of COVID-19	-1	unanswerable	unanswerable	2020-05-22
zfsp559f	zfsp559f	Objectives Our primary objective is to predict the dynamics of COVID-19 epidemic in India while adjusting for the effects of various progressively implemented containment measures. Apart from forecasting the major turning points and parameters associated with the epidemic, we intend to provide an epidemiological assessment of the impact of these containment measures in India. Methods We propose a…	Forecasting Transmission Dynamics of COVID-19 Epidemic in India under Various Containment Measures- A Time-Dependent State-Space SIR Approach	1	disease name: COVID-19 location: India date: - R0 value: 4.46 (7.1)( no-intervention) assuming 14-day (24-day) infectious period %CI values: - method: time-series SIR model | disease name: COVID-19 location: India date: - R0 value: 1.47 (2.33)(partial-lockdown) assuming 14-day (24-day) infectious period %CI values: - method: time-series SIR model | disease name: COVID-19 location: India date: - R…	[{"contribution":{"disease name": "COVID-19", "location": "India", "date": "-", "R0 value": "4.46 (7.1)( no-intervention) assuming 14-day (24-day) infectious period", "%CI values": "-", "method": "time-series SIR model"}},{"contribution":{"disease name": "COVID-19", "location": "India", "date": "-", "R0 value": "1.47 (2.33)(partial-lockdown) assuming 14-day (24-day) infectious period", "%CI value…	2020-05-13 10:00:00		923
me6gqc9c	me6gqc9c	Based on the well known SIR model, this paper develops a model for predicting the number of necessary testings of asymptomatic persons in order to push Reff below 1, thus suppressing an outbreak. The model considers R0, time for obtaining a test result, and effect of population discipline. The outcome are closed form expressions for the number of daily tests.	How Often Should People be Tested for Corona to Avoid a Shutdown?	-1	unanswerable	unanswerable	2020-04-27 10:00:00
toxv6k7k	toxv6k7k	Asymptomatic transmission of the coronavirus disease and the infected individual prediction has become very important in the COVID-19 outbreak study. The asymptomatic and symptomatic transmission studies are still ongoing to assess their impacts on disease monitoring and burden. However, there has been limited research on how asymptomatic and symptomatic transmissions together can affect the coro…	Modeling the SARS-CoV-2 parallel transmission dynamics: Asymptomatic and symptomatic pathways	-1	unanswerable	unanswerable	2022-01-25 05:00:00
8b9r9jy9	8b9r9jy9	Data-based analysis gives out an estimation of the incubation period. A dynamic model is established and discussed. Disease reproduction number reveals the high probability of COVID-19 pandemic, but strengthening the exposure of asymptomatic people will help to curb the transmission, and measures of contact-tracking and stay-at-home play a replaceable role. Discussions point out that social disru…	Investigations on the Control of COVID-19 and Suggestions for Re-Open Based on Model Study	-1	unanswerable	unanswerable	2022
n2abv3ub	n2abv3ub	BACKGROUND: The new Middle East respiratory syndrome coronavirus (MERS-CoV) infection shares many clinical, epidemiological, and virological similarities with that of severe acute respiratory syndrome (SARS)-CoV. We aimed to estimate virus transmissibility and the epidemic potential of MERS-CoV, and to compare the results with similar findings obtained for prepandemic SARS. METHODS: We retrieved …	Interhuman transmissibility of Middle East respiratory syndrome coronavirus: estimation of pandemic risk	1	disease name: MERS-CoV location: - date: June 21, 2013, excluding cases notified in the previous 2 weeks R0 value: 0·69 (pessimistic scenario) %CI values: (95% CI 0·50-0·92) method: Bayesian analysis | disease name: MERS-CoV location: - date: June 21, 2013, excluding cases notified in the previous 2 weeks R0 value: 0·60 (optimistic scenario) %CI values: (0·42-0·80) method: Bayesian analysis	[{"contribution":{"disease name": "MERS-CoV", "location": "-", "date": "June 21, 2013, excluding cases notified in the previous 2 weeks", "R0 value": "0·69 (pessimistic scenario)", "%CI values": "(95% CI 0·50-0·92)", "method": "Bayesian analysis"}},{"contribution":{"disease name": "MERS-CoV", "location": "-", "date": "June 21, 2013, excluding cases notified in the previous 2 weeks", "R0 value": "…	2013-07-05 10:00:00		891
kghgfzn2	kghgfzn2	The sequence of non-structural protein NS1 of bluetongue virus (BTV), which contains immunodominant CD8+ T cell epitopes, is highly conserved among BTV serotypes, and has therefore become a major tool in the development of a universal BTV vaccine. In this work, we have engineered multiserotype BTV vaccine candidates based on recombinant chimpanzee adenovirus (ChAdOx1) and modified vaccinia virus …	Heterologous Combination of ChAdOx1 and MVA Vectors Expressing Protein NS1 as Vaccination Strategy to Induce Durable and Cross-Protective CD8+ T Cell Immunity to Bluetongue Virus	-1	unanswerable	unanswerable	2020-06-29
47y193qj	47y193qj	BACKGROUND: The purpose of the work is to analyze population adaptation to SARS-CoV-2 in Europe in March-May 2020, predict herd immunity formation in the nearest several months on the basis of our SIR modified epidemiological model of the virus spread and elaborate recommendations to governments regarding a second wave of COVID-19 pandemic. METHODS: Outer (1,006,512 RT-PCR tests results for SARS-…	Trends in adaptation of fifteen European countries population to SARS-CoV-2 in March-May 2020: Can Taiwanese experience be adopted?	1	disease name: SARS-CoV-2 location: Europe date: March 2 - May 22, 2020 R0 value: r0 = 4.671 for the full-lockdown mode %CI values: - method: SIR modified epidemiological model | disease name: SARS-CoV-2 location: Europe date: March 2 - May 22, 2020 R0 value: r0 = 5.539 for the no-lockdown mode %CI values: - method: SIR modified epidemiological model	[{"contribution":{"disease name": "SARS-CoV-2", "location": "Europe", "date": "March 2 - May 22, 2020", "R0 value": "r0 = 4.671 for the full-lockdown mode", "%CI values": "-", "method": "SIR modified epidemiological model"}},{"contribution":{"disease name": "SARS-CoV-2", "location": "Europe", "date": "March 2 - May 22, 2020", "R0 value": "r0 = 5.539 for the no-lockdown mode", "%CI values": "-", "…	2020		1546
sfww0xcc	sfww0xcc	The recent emergence of a previously unknown coronavirus (SARS-CoV-2), first confirmed in the city of Wuhan in China in December 2019, has caused serious public health and economic issues due to its rapid dissemination worldwide. Although 61,888 confirmed cases had been reported in Brazil by 28 April 2020, little was known about the SARS-CoV-2 epidemic in the country. To better understand the rec…	The ongoing COVID-19 epidemic in Minas Gerais, Brazil: insights from epidemiological data and SARS-CoV-2 whole genome sequencing.	-1	unanswerable	unanswerable	2020-05-11 10:00:00
hvslu1vf	hvslu1vf	Masks are a vital tool for limiting SARS-CoV-2 spread in the population. Here we utilize a mathematical model to assess the impact of masking on transmission within individual transmission pairs and at the population level. Our model quantitatively links mask efficacy to reductions in viral load and subsequent transmission risk. Our results reinforce that the use of masks by both a potential tran…	Slight reduction in SARS-CoV-2 exposure viral load due to masking results in a significant reduction in transmission with widespread implementation	-1	unanswerable	unanswerable	2021
61v05oxj	61v05oxj	In the current manuscript, we deal with the dynamics of a piecewise covid-19 mathematical model with quarantine class and vaccination using SEIQR epidemic model. For this, we discussed the deterministic, stochastic, and fractional forms of the proposed model for different steps. It has a great impact on the infectious disease models and especially for covid-19 because in start the deterministic m…	A robust study of a piecewise fractional order COVID-19 mathematical model	-1	unanswerable	unanswerable	2021-11-20
1n0rg5vd	1n0rg5vd	BACKGROUND: Contact tracing plays an important role in the control of emerging infectious diseases, but little is known yet about its effectiveness. Here we deduce from a generic mathematical model how effectiveness of tracing relates to various aspects of time, such as the course of individual infectivity, the (variability in) time between infection and symptom-based detection, and delays in the…	The Effectiveness of Contact Tracing in Emerging Epidemics	-1	unanswerable	unanswerable	2006-12-20
z4hr6tcz	z4hr6tcz	The aim of this paper is to show how North Cyprus fights Covid-19 by using the basic reproduction number R-0 and effective reproduction number R-t. According to the Wikipedia page with title Covid-19 pandemic in Northern Cyprus. North Cyprus is the first country in Europe to free from Covid-19. One of the important reasons of this is that the government decided for tackling Covid-19 pandemic by u…	Effective Reproduction Number for North Cyprus Fighting Covid-19	1	disease name: Covid-19 location: North Cyprus date: March 11, 2020 to May 15, 2020 R0 value: 0.65 to 2.38 %CI values: - method: SEW model	[{"contribution":{"disease name": "Covid-19", "location": "North Cyprus", "date": "March 11, 2020 to May 15, 2020", "R0 value": "0.65 to 2.38", "%CI values": "-", "method": "SEW model"}}]	2021
9bkcx3hr	9bkcx3hr	Des progrÃƒÂ¨s remarquables ont ÃƒÂ©tÃƒÂ© obtenus dans notre comprÃƒÂ©hension de la transmission du SARS-CoV-2 et la rÃƒÂ©duction de sa propagation. La prise en compte du risque majeur des formes asymptomatiques par le port universel du masque est une de ces avancÃƒÂ©es. Les donnÃƒÂ©es ÃƒÂ©pidÃƒÂ©miologiques (taux d'attaque et R0) ainsi que l'accumulation de donnÃƒÂ©es en contexte clinique suggÃƒ…	Modes de transmission du SARS-CoV-2 : que sait-on actuellement ?	-1	unanswerable	unanswerable	2022-01-31 05:00:00
cpc6nh2p	cpc6nh2p	A systematic review and meta-analysis of the entire COVID-19 Tracheostomy cohort was conducted to determine the cumulative incidence of complications, mortality, time to decannulation and ventilatory weaning. Outcomes of surgical versus percutaneous and outcomes relative to tracheostomy timing were also analysed. Studies reporting outcome data on patients with COVID-19 undergoing tracheostomy wer…	Systematic review and meta-analysis of tracheostomy outcomes in covid-19 patients	-1	unanswerable	unanswerable	2021-05-18 10:00:00
xt1pmchb	xt1pmchb	BACKGROUND: SARS-CoV-2, the novel coronavirus that causes COVID-19, is a global pandemic with higher mortality and morbidity than any other virus in the last 100 years. Without public health surveillance, policy makers cannot know where and how the disease is accelerating, decelerating, and shifting. Unfortunately, existing models of COVID-19 contagion rely on parameters such as the basic reprodu…	Dynamic Panel Estimate-Based Health Surveillance of SARS-CoV-2 Infection Rates to Inform Public Health Policy: Model Development and Validation	-1	unanswerable	unanswerable	2020
5s1q8i4l	5s1q8i4l	The basic reproductive number [Formula: see text] of a discrete SIR epidemic model is defined and the dynamical behavior of the model is studied. It is proved that the disease free equilibrium is globally asymptotically stable if [Formula: see text], and the persistence of the model is obtained when [Formula: see text]. The main attention is paid to the global stability of the endemic equilibrium…	Global stability of the endemic equilibrium of a discrete SIR epidemic model	-1	unanswerable	unanswerable	2013-02-25
ihzvr0nc	ihzvr0nc	Mathematical models and statistical inference are fundamental for surveillance and control of the COVID-19 pandemic. Several aspects cause regional heterogeneity in disease spread. Individual behaviour, mobility, viral variants and transmission vary locally, temporally and with season, and interventions and vaccination are often implemented regionally. Therefore, we developed a new regional chang…	Regional probabilistic situational awareness and forecasting of COVID-19	0	disease name: COVID-19 location: Norway date: - R0 value: - %CI values: - method: sequential Approximate Bayesian Computation	[{"contribution":{"disease name": "COVID-19", "location": "Norway", "date": "-", "R0 value": "-", "%CI values": "-", "method": "sequential Approximate Bayesian Computation"}}]	2021		340
q4a1n1wm	q4a1n1wm	The effective reproduction number, Rt, is a key time-varying prognostic for the growth rate of any infectious disease epidemic. Significant changes in Rt can forewarn about new transmissions within a population or predict the efficacy of interventions. Inferring Rt reliably and in real-time from observed time-series of infected (demographic) data is an important problem in population dynamics. Th…	Using information theory to optimise epidemic models for real-time prediction and estimation	-1	unanswerable	unanswerable	2020
n3biy29t	n3biy29t	To assess the effectiveness of the containment strategies proposed in Japan, an SEIAQR (susceptible-exposed-infected-asymptomatic-quarantined-recovered) model was established to simulate the transmission of COVID-19. We divided the spread of COVID-19 in Japan into different stages based on policies. The effective reproduction number [Formula: see text] and the transmission parameters were determi…	Modelling Analysis of COVID-19 Transmission and the State of Emergency in Japan	-1	unanswerable	unanswerable	2021-06-26 10:00:00
x0q9ekcz	x0q9ekcz	The novel coronavirus (2019-nCoV) is a recently emerged human pathogen that has spread widely since January 2020. Initially, the basic reproductive number, R0, was estimated to be 2.2 to 2.7. Here we provide a new estimate of this quantity. We collected extensive individual case reports and estimated key epidemiology parameters, including the incubation period. Integrating these estimates and hig…	The Novel Coronavirus, 2019-nCoV, is Highly Contagious and More Infectious Than Initially Estimated	1	disease name: 2019-nCoV location: - date: - R0 value: between 4.7 and 6.6 %CI values: - method: mathematical models	[{"contribution":{"disease name": "2019-nCoV", "location": "-", "date": "-", "R0 value": "between 4.7 and 6.6", "%CI values": "-", "method": "mathematical models"}}]	2020-02-09 05:00:00
fugtzr7d	fugtzr7d	Background: Quantitative characterisation of any contagious diseases could help in making effective strategy to prevent further spreading of the disease. Despite the rapid research in prevention of spreading COVID-19, yet there is no quantitatively information about spatiotemporal epidemiology and epidemic intensity of COVID-19. Therefore, we aimed to quantitatively characterize spatiotemporal ep…	COVID-19 Potential To Infect 4.44% Indian Population	1	disease name: COVID-19 location: India date: April-2021 to May-2021 R0 value: 0.77 %CI values: - method: Novel statistical model was designed to quantitatively characterize spatiotemporal epidemiology and epidemic intensity of COVID-19	[{"contribution":{"disease name": "COVID-19", "location": "India", "date": "April-2021 to May-2021", "R0 value": "0.77", "%CI values": "-", "method": "Novel statistical model was designed to quantitatively characterize spatiotemporal epidemiology and epidemic intensity of COVID-19"}}]	2021
zd4c5g5g	zd4c5g5g	Coronavirus disease (COVID-19) caused by SARS-CoV-2 was notified from Wuhan city, Hubei province, China in the mid of December 2019. The disease is showing dynamic change in the pattern of COVID-19 confirmed cases and death toll in these low and middle-income countries (LMICs). In this study, exponential growth (EG) method was used to calculate the reproductive rate (Rt) for initial and current s…	Responses to COVID-19 in South Asian Association for Regional Cooperation (SAARC) countries in 2020, a data analysis during a world of crises	-1	unanswerable	unanswerable	2021-08-05 10:00:00
qvn9ehkh	qvn9ehkh	To estimate the reproductive number (R0) of the coronavirus in the present scenario and to predict the incidence of daily and probable cumulative cases, by 20 August, 2020 for Karnataka state in India. The model used serial interval with a gamma distribution and applied 'early R' to estimate the R0 and 'projections' package in R program. This was performed to mimic the probable cumulative epidemi…	Prediction of daily and cumulative cases for COVID-19 infection based on reproductive number (R0) in Karnataka: a data-driven analytics	1	disease name: COVID-19 location: Karnataka state in India date: June 2020 R0 value: 2.242 %CI values: 1.50-3.00 method: bootstrap resampling method	[{"contribution":{"disease name": "COVID-19", "location": "Karnataka state in India", "date": "June 2020", "R0 value": "2.242", "%CI values": "1.50-3.00", "method": "bootstrap resampling method"}}]	2021
a3l1dp35	a3l1dp35	BACKGROUND: During the second wave of COVID-19 in August 2020, the Tokyo Metropolitan Government implemented public health and social measures to reduce on-site dining. Assessing the associations between human behavior, infection, and social measures is essential to understand achievable reductions in cases and identify the factors driving changes in social dynamics. OBJECTIVE: The aim of this st…	On-site Dining in Tokyo During the COVID-19 Pandemic: Time Series Analysis Using Mobile Phone Location Data	-1	unanswerable	unanswerable	2021
b9nzuj0b	b9nzuj0b	This study aimed at estimating the transmissibility of hepatitis C. The data for hepatitis C cases were collected in six districts in Xiamen City, China from 2004 to 2018. A population-mixed susceptible-infectious-chronic-recovered (SICR) model was used to fit the data and the parameters of the model were calculated. The basic reproduction number (R(0)) and the number of newly transmitted cases b…	The transmissibility of hepatitis C virus: a modelling study in Xiamen City, China	1	disease name: hepatitis C location: Xiamen City, China date: 2004 to 2018 R0 value: 0.4059 %CI values: - method: population-mixed susceptible-infectious-chronic-recovered (SICR) model	[{"contribution":{"disease name": "hepatitis C", "location": "Xiamen City, China", "date": "2004 to 2018", "R0 value": "0.4059", "%CI values": "-", "method": "population-mixed susceptible-infectious-chronic-recovered (SICR) model"}}]	2020-11-25 05:00:00
wtpr7m9v	wtpr7m9v	SARS is a respiratory infection caused by Coronavirus (Nidoviruses, RNA) from which 3 groups are known. Group 1 affects dogs, cats, pigs, and the human agent is 229 E. Group 2 affects bovines or rodents, and the human agent is OC43. And group 3 corresponds to the avian pathology.... The epidemics emerged on February 2003 in Guangdong, South China, due to consumption of exotic animals (Civeta, etc…	[Epidemiological perspectives on SARS and avian influenza].	1	disease name: SARS and Avian Influenza location: Guangdong, South China and Asia date: emerged on February 2003 R0 value: 2 to 4 %CI values: - method: -	[{"contribution":{"disease name": "SARS and Avian Influenza", "location": "Guangdong, South China and Asia", "date": "emerged on February 2003", "R0 value": "2 to 4", "%CI values": "-", "method": "-"}}]	2004
n7wt41g2	n7wt41g2	Genomic sequencing has significant potential to inform public health management for SARS-CoV-2. Here we report high-throughput genomics for SARS-CoV-2, sequencing 80% of cases in Victoria, Australia (population 6.24 million) between 6 January and 14 April 2020 (total 1,333 COVID-19 cases). We integrate epidemiological, genomic and phylodynamic data to identify clusters and impact of interventions…	Tracking the COVID-19 pandemic in Australia using genomics	-1	unanswerable	unanswerable	2020-09-01 10:00:00
cod0jmvw	cod0jmvw	In the work, author's presents a very significant and important issues related to the health of mankind's. Which is extremely important to realize the complex dynamic of inflected disease. With the help of Caputo fractional derivative, We capture the epidemiological system for the transmission of Novel Coronavirus-19 Infectious Disease (nCOVID-19). We constructed the model in four compartments su…	Theoretical and Numerical Analysis of Novel COVID-19 via Fractional order Mathematical Model	-1	unanswerable	unanswerable	2020
ayn1724y	ayn1724y	This paper investigates the impact of human activity and mobility (HAM) in the spreading dynamics of an epidemic. Specifically, it explores the interconnections between HAM and its effect on the early spread of the COVID-19 virus. During the early stages of the pandemic, effective reproduction numbers exhibited a high correlation with human mobility patterns, leading to a hypothesis that the HAM …	A Linear Dynamical Perspective on Epidemiology: Interplay Between Early COVID-19 Outbreak and Human Mobility	-1	unanswerable	unanswerable	2021
ieejlnk0	ieejlnk0	In the first wave of the COVID-19 pandemic, broad usage of non-pharmaceutical interventions played a crucial role in controlling epidemics. However, the substantial economic and societal costs of continuous use of border controls, travel restrictions, and physical distancing measures suggest that these measures may not be sustainable and that policymakers have to seek strategies to lift the restr…	Effects of case- and population-based COVID-19 interventions in Taiwan	-1	unanswerable	unanswerable	2020-08-19 10:00:00
i4us2rq1	i4us2rq1	COVID-19 remains the concern of the globe as governments struggle to defeat the pandemic. Understanding the dynamics of the epidemic is as important as detecting and treatment of infected individuals. Mathematical models play a crucial role in exploring the dynamics of the outbreak by deducing strategies paramount for curtailing the disease. The research extensively studies the SEQIAHR compartmen…	Global Analysis and Optimal Control Model of COVID-19	0	disease name: COVID-19 location: - date: - R0 value: - %CI values: - method: -	[{"contribution":{"disease name": "COVID-19", "location": "-", "date": "-", "R0 value": "-", "%CI values": "-", "method": "-"}}]	2022-01-27 05:00:00
xctq1cju	xctq1cju	The COVID-19 pandemic disrupted health systems and economies throughout the world during 2020 and was particularly devastating for the United States. Many of epidemiological features that produced observed rates of morbidity and mortality have not been thoroughly assessed. Here we use a data-driven model-inference approach to simulate the pandemic at county-scale in the United States during 2020 …	Overall burden and characteristics of COVID-19 in the United States during 2020	-1	unanswerable	unanswerable	2021-02-17
1j7i1ju5	1j7i1ju5	SARS-CoV-2 or COVID-19 was introduced into India by multiple sources generating local clusters and leading to the nationwide spread. A retrospective study has been conducted on the epidemiological features and spatial spread of COVID-19 in India during February 2020Ã¢â‚¬â€œMarch 2021. For each district, the cumulative number of confirmed COVID-19 cases were fitted to exponential growth model for …	District-wise estimation of Basic reproduction number (R(0)) for COVID-19 in India in the initial phase	1	disease name: COVID-19 location: India date: February 2020-March 2021 R0 value: R(0) > 7 %CI values: - method: exponential growth model for the initial phase of the outbreak	[{"contribution":{"disease name": "COVID-19", "location": "India", "date": "February 2020-March 2021", "R0 value": "R(0) > 7", "%CI values": "-", "method": "exponential growth model for the initial phase of the outbreak"}}]	2021-07-17
774azp7u	774azp7u	The role of school-based contacts in the epidemiology of SARS-CoV-2 is incompletely understood. We use an age-structured transmission model fitted to age-specific seroprevalence and hospital admission data to assess the effects of school-based measures at different time points during the COVID-19 pandemic in the Netherlands. Our analyses suggest that the impact of measures reducing school-based c…	Model-based evaluation of school- and non-school-related measures to control the COVID-19 pandemic	-1	unanswerable	unanswerable	2021
mzi8504f	mzi8504f	Background: The coronavirus disease 2019 (COVID-19) first identified in China, spreads rapidly across the globe and is considered the fastest moving pandemic in history. The new disease has challenged policymakers and scientists on key issues such as the magnitude of the first-time problem, the susceptibility of the population, the severity of the disease, and its symptoms. Most countries have ad…	The signature features of COVID-19 pandemic in a hybrid mathematical model - implications for optimal work-school lockdown policy	1	disease name: coronavirus disease 2019 (COVID-19) location: Israel date: September 1, 2020 R0 value: 2.2 %CI values: - method: age-structured mathematical model is based on SIRD two age-class model	[{"contribution":{"disease name": "coronavirus disease 2019 (COVID-19)", "location": "Israel", "date": "September 1, 2020", "R0 value": "2.2", "%CI values": "-", "method": "age-structured mathematical model is based on SIRD two age-class model"}}]	2020-11-04
v5n6z095	v5n6z095	Disease outbreaks, such as those of Severe Acute Respiratory Syndrome in 2003 and the 2009 pandemic A(H1N1) influenza, have highlighted the potential for airborne transmission in indoor environments. Respirable pathogen-carrying droplets provide a vector for the spatial spread of infection with droplet transport determined by diffusive and convective processes. An epidemiological model describing…	Spatial dynamics of airborne infectious diseases	-1	unanswerable	unanswerable	2012-03-21 05:00:00
m0d72ntg	m0d72ntg	In order to quantitatively characterize the epidemic of COVIDÃ¢â‚¬â€¢19, useful relations among parameters describing an epidemic in general are derived based on the Kermack-McKendrick model. The first relation is 1/Ãâ€žgrow=1/Ãâ€žtransÃ¢Ë†â€™1/Ãâ€žinf, where Ãâ€žgrow is the time constant of the exponential growth of an epidemic, Ãâ€žtrans is the time for a pathogen to be transmitted from on…	Relations of parameters for describing the epidemic of COVIDÃ¢â‚¬â€¢19 by the KermackÃ¢â‚¬â€¢McKendrick model	-1	unanswerable	unanswerable	2020-03-03 05:00:00
q02rwxku	q02rwxku	In Latin America, there has been tremendous progress towards eliminating canine rabies. Major components of rabies elimination programs leading to these successes have been constant and regular surveillance for rabid dogs and uninterrupted yearly mass dog vaccination campaigns. Unfortunately, vital measures to control COVID-19 have had the negative trade-off of jeopardizing these rabies eliminati…	The impact of the COVID-19 pandemic on rabies reemergence in Latin America: The case of Arequipa, Peru	-1	unanswerable	unanswerable	2021
p3kx4bbm	p3kx4bbm	Background: The COVID-19 pandemic has shown how a newly emergent communicable disease can lay considerable burden on public health. To avoid system collapse, governments have resorted to several social distancing measures. In Belgium, this included a lockdown and a following period of phased re-opening. Methods: A representative sample of Belgian adults was asked about their contact behaviour fro…	CoMix: comparing mixing patterns in the Belgian population during and after lockdown	1	disease name: COVID-19 location: Belgium date: mid-April to mid-July R0 value: median value larger than one, although with a wide dispersion %CI values: - method: Rapidly deployed survey	[{"contribution":{"disease name": "COVID-19", "location": "Belgium", "date": "mid-April to mid-July", "R0 value": "median value larger than one, although with a wide dispersion", "%CI values": "-", "method": "Rapidly deployed survey"}}]	2020-08-07		125
eytjk3px	eytjk3px	BACKGROUND: An outbreak of severe acute respiratory syndrome coronavirus 2 (SARS-CoV-2) has led to 95ÃƒÂ¢Ã‚â‚¬Ã‚Ë†333 confirmed cases as of March 5, 2020. Understanding the early transmission dynamics of the infection and evaluating the effectiveness of control measures is crucial for assessing the potential for sustained transmission to occur in new areas. Combining a mathematical model of sever…	Early dynamics of transmission and control of COVID-19: a mathematical modelling study	-1	unanswerable	unanswerable	2020
9k8bd3wy	9k8bd3wy	The novel coronavirus disease 2019 (COVID-19) outbreak on the Diamond Princess (DP) ship has caused over 634 cases as of February 20, 2020. We model the transmission process on the ship with a stochastic branching process, and estimate the basic reproduction number at 2.9 (95%CrI: 1.7Ã¢â‚¬â€œ7.7). The epidemic doubling time is at 3.4 days, and thus timely actions were crucial. We estimate the COV…	Modelling COVID-19 outbreak on the Diamond Princess ship using the public surveillance data	1	disease name: COVID-19 location: Diamond Princess ship date: - R0 value: 2.9 %CI values: (95%CrI: 1.7-7.7) method: stochastic branching process	[{"contribution":{"disease name": "COVID-19", "location": "Diamond Princess ship", "date": "-", "R0 value": "2.9", "%CI values": "(95%CrI: 1.7-7.7)", "method": "stochastic branching process"}}]	2022-05-26 10:00:00
6smyl1k0	6smyl1k0	The development of health technology and the use of technology at this time are very useful in helping human activities especially regarding health. During the COVID-19 pandemic many people are worried about safety when doing activities indoors or outdoors. In this case the government recommends doing the 3 M washing hands wearing masks and social distance. In this case it certainly has a big imp…	Perancangan sistem perhitungan jumlah orang dalam suatu ruangan berbasis HC-SR04 di SMK Perintis	-1	unanswerable	unanswerable	2021
iewh60sv	iewh60sv	The current work is of interest to introduce a detailed analysis of the novel fractional COVID-19 model. Non-local fractional operators are one of the most efficient tools in order to understand the dynamics of the disease spread. For this purpose, we intend as an attempt at investigating the fractional COVID-19 model through Caputo operator with order &#967; &#8712; ( 0 , 1 ) . Employing the fix…	Analysis of novel fractional COVID-19 model with real-life data application	-1	unanswerable	unanswerable	2021
0plt9dhh	0plt9dhh	BACKGROUND: During the coronavirus disease 2019 (COVID-19) epidemic, many countries have instituted population-wide measures for social distancing. The requirement of patients on dialysis for regular treatment in settings typically not conducive to social distancing may increase their vulnerability to COVID-19. METHODS: Over a 6-week period, we recorded new COVID-19 infections and outcomes for al…	Epidemiology of COVID-19 in an Urban Dialysis Center	1	disease name: coronavirus disease 2019 (COVID-19) location: Large dialysis center date: Over a 6-week period R0 value: 2.2 %CI values: - method: predictive epidemic model	[{"contribution":{"disease name": "coronavirus disease 2019 (COVID-19)", "location": "Large dialysis center", "date": "Over a 6-week period", "R0 value": "2.2", "%CI values": "-", "method": "predictive epidemic model"}}]	2020
khdjsc4r	khdjsc4r	With limited availability of vaccines, an efficient use of the limited supply of vaccines in order to achieve herd immunity will be an important tool to combat the wide-spread prevalence of COVID-19. Here, we propose a targeted vaccination approach (EHR) that provides a significant reduction in the necessary number of doses needed achieve herd immunity compared to age-prioritized and random selec…	Strategies for vaccination against SARS-CoV-2 to efficiently bring R<1	-1	unanswerable	unanswerable	2021-02-01 05:00:00
gs8i9msz	gs8i9msz	On February 5 the Japanese government ordered the passengers and crew on the Diamond Princess to start a two week quarantine after a former passenger tested positive for COVID-19. During the quarantine the virus spread rapidly throughout the ship. By February 20, there were 651 cases. We model this quarantine with a SEIR model including asymptomatic infections with differentiated shipboard roles …	Minimizing disease spread on a quarantined cruise ship: A model of COVID-19 with asymptomatic infections	-1	unanswerable	unanswerable	2020
jg5p6qnf	jg5p6qnf	BACKGROUND: Whole-genome sequencing of pathogens can improve resolution of outbreak clusters and define possible transmission networks. We applied high-throughput genome sequencing of SARS-CoV-2 to 75% of cases in the State of Victoria (population 6.24 million) in Australia. METHODS: Cases of SARS-CoV-2 infection were detected through active case finding and contact tracing. A dedicated SARS-CoV-…	Tracking the COVID-19 pandemic in Australia using genomics	-1	unanswerable	unanswerable	2020-05-16 10:00:00
ds53gw95	ds53gw95	Middle East Respiratory Syndrome Coronavirus (MERS-CoV) causes severe acute respiratory illness with a case fatality rate (CFR) of 35,5%. The highest number of MERS-CoV cases are from Saudi-Arabia, the major worldwide hotspot for this disease. In the absence of neither effective treatment nor a ready-to-use vaccine and with yet an incomplete understanding of its epidemiological cycle, prevention …	A realistic two-strain model for MERS-CoV infection uncovers the high risk for epidemic propagation	1	disease name: MERS-CoV location: Macca, Madina and Riyadh date: 2012-2016 R0 value: a high epidemic risk (1&#8804;R0&#8804;2,5) in Riyadh and Macca %CI values: - method: mathematical models of disease epidemiology, 2-strain models	[{"contribution":{"disease name": "MERS-CoV", "location": "Macca, Madina and Riyadh", "date": "2012-2016", "R0 value": "a high epidemic risk (1&#8804;R0&#8804;2,5) in Riyadh and Macca", "%CI values": "-", "method": "mathematical models of disease epidemiology, 2-strain models"}}]	2020
x2zq0lnt	x2zq0lnt	BACKGROUND: With the increased occurrence of outbreaks of H5N1 worldwide there is concern that the virus could enter commercial poultry farms with severe economic consequences. METHODOLOGY/PRINCIPAL FINDINGS: We analyse data from four recent outbreaks of highly pathogenic avian influenza (HPAI) in commercial poultry to estimate the farm-to-farm reproductive number for HPAI. The reproductive numbe…	The Transmissibility of Highly Pathogenic Avian Influenza in Commercial Poultry in Industrialised Countries	1	disease name: highly pathogenic avian influenza (HPAI) location: commercial poultry date: prior to controls R0 value: 1.1 to 2.4 (mean farm-to-farm) %CI values: - method: - | disease name: highly pathogenic avian influenza (HPAI) location: commercial poultry date: prior to controls R0 value: 2.2 to 3.2 (maximum farm-based) %CI values: - method: - | disease name: highly pathogenic avian influenza …	[{"contribution":{"disease name": "highly pathogenic avian influenza (HPAI)", "location": "commercial poultry", "date": "prior to controls", "R0 value": "1.1 to 2.4 (mean farm-to-farm)", "%CI values": "-", "method": "-"}},{"contribution":{"disease name": "highly pathogenic avian influenza (HPAI)", "location": "commercial poultry", "date": "prior to controls", "R0 value": "2.2 to 3.2 (maximum farm…	39176.4		1160
[truncated: 560 more rows]
